# Supplementary material for: Isolation and characterization of diverse microbial representatives from the human skin microbiome
Source: Microbiome. 2020 Apr 22;8:58. doi: 10.1186/s40168-020-00831-y (PMC7178971; doi:10.1186/s40168-020-00831-y)
Supplement: Supplementary file 2 — Additional file 1. This file contains supporting tables and information not included in the primary text. [file 40168_2020_831_MOESM1_ESM.xlsx]

## Sheet: ST1_SubjectMetadata
MURIID	A1_AGE	A3_SEX	A4_HEIGHTFEET	A4_HEIGHTINCHES	A4_WEIGHT	A6_ETHNICITY	A7_ANCESTRY	A8_COUNTRY_OF_BIRTH	A9_COUNTRIES_YOU_HAVE_LIVED_IN	A10_EDUCATION	B1_SHOWER	B1_BATHE	B2_SHOWER_/_BATHE_TEMPERATURE	B3_SUN_EXPOSURE	B4_HAND_SOAP_-_BRAND_/_TYPE	B4_HAND_SOAP_-_SITE_OF_APPLICATION	B4_HAND_SOAP_-_FREQUENCY	B4_BAR_SOAP_-_BRAND_/_TYPE	B4_BAR_SOAP_-_SITE_OF_APPLICATION	B4_BAR_SOAP_-_FREQUENCY	B4_BODY_WASH_-_BRAND_/_TYPE	B4_BODY_WASH_-_SITE_OF_APPLICATION	B4_BODY_WASH_-_FREQUENCY	B4_FACIAL_SOAP,_SCRUB,_CLEANSER_-_BRAND_/_TYPE	B4_FACIAL_SOAP,_SCRUB,_CLEANSER_-_SITE_OF_APPLICATION	B4_FACIAL_SOAP,_SCRUB,_CLEANSER_-_FREQUENCY	B4_FACE_MASK_-_BRAND_/_TYPE	B4_FACE_MASK_-_SITE_OF_APPLICATION	B4_FACE_MASK_-_FREQUENCY	B4_SHAMPOO_-_BRAND_/_TYPE	B4_SHAMPOO_-_SITE_OF_APPLICATION	B4_SHAMPOO_-_FREQUENCY	B4_OTHER_HAIR_CARE_PRODUCTS_-_BRAND_/_TYPE	B4_OTHER_HAIR_CARE_PRODUCTS_-_SITE_OF_APPLICATION	B4_OTHER_HAIR_CARE_PRODUCTS_-_FREQUENCY	B4_HAND_SANITIZER_-_BRAND_/_TYPE	B4_HAND_SANITIZER_-_SITE_OF_APPLICATION	B4_HAND_SANITIZER_-_FREQUENCY	B4_MOISTURIZING_OR_RESORATIVE_CREAM_-_BRAND_/_TYPE	B4_MOISTURIZING_OR_RESORATIVE_CREAM_-_SITE_OF_APPLICATION	B4_MOISTURIZING_OR_RESORATIVE_CREAM_-_FREQUENCY	B4_MOISTURIZING_OR_RESORATIVE_LOTION_-_BRAND_/_TYPE	B4_MOISTURIZING_OR_RESORATIVE_LOTION_-_SITE_OF_APPLICATION	B4_MOISTURIZING_OR_RESORATIVE_LOTION_-_FREQUENCY	B4_SHAVING_CREAM_OR_LOTION_-_BRAND_/_TYPE	B4_SHAVING_CREAM_OR_LOTION_-_SITE_OF_APPLICATION	B4_SHAVING_CREAM_OR_LOTION_-_FREQUENCY	B4_SKIN_OIL_-_BRAND_/_TYPE	B4_SKIN_OIL_-_SITE_OF_APPLICATION
54	38	FEMALE	5	6	155	NOT+HISPANIC+OR+LATINO	WHITE	USA	USA	Bachelors	4	0	Fairly+hot	2	TraderJoesDishSoap%0D%0A	Hands%0D%0A	2%2Fday%0D%0A	TraderJoesPeppermintSoap%0D%0A	Hands%0D%0A	2%2Fday%0D%0A	JasonsOrganic%0D%0A	Body%0D%0A	4%2Fweek%0D%0A	TraderJoesFaceWash%0D%0A	Face%0D%0A	1%2Fday%0D%0A	N%2FA%0D%0A	N%2FA%0D%0A	N%2FA%0D%0A	Pantene%0D%0A	Hair%0D%0A	4%2Fweek%0D%0A	BatisteDryShampoo%0D%0A	Hair%0D%0A	2%2Fweek%0D%0A	Purell%0D%0A	Hands%0D%0A	2%2Fweek%0D%0A	DavitaSPF30FaceLotion%0D%0A	Face%0D%0A	Daily%0D%0A	CurellBodyLotionUnscented%0D%0A	Body%0D%0A	4%2Fweek%0D%0A	Gilette%0D%0A	Armpits%0D%0ALegs%0D%0A	1%2Fweek%0D%0A	N%2FA%0D%0A	N%2FA%0D%0A
55	31	MALE	6	0	185	NOT+HISPANIC+OR+LATINO	BLACK+OR+AFRICAN+AMERICAN	Nigeria	USA%2C+Nigeria%2C+England	Associates	6	0	Fairly+hot	10	Softsoap%0D%0A	Hands%0D%0A	10%2Fday%0D%0A	N%2FA%0D%0A	N%2FA%0D%0A	N%2FA%0D%0A	WhiteRain%0D%0A	Body%0D%0A	6%2Fweek%0D%0A	WhiteRain%0D%0A	Face%0D%0A	6%2Fweek%0D%0A	N%2FA%0D%0A	N%2FA%0D%0A	N%2FA%0D%0A	WhiteRain%0D%0A	Head%0D%0A	6%2Fweek%0D%0A	N%2FA%0D%0A	N%2FA%0D%0A	N%2FA%0D%0A	N%2FA%0D%0A	N%2FA%0D%0A	N%2FA%0D%0A	N%2FA%0D%0A	N%2FA%0D%0A	N%2FA%0D%0A	Dermasil%0D%0A	Body%0D%0A	1%2Fday%0D%0A	N%2FA%0D%0A	N%2FA%0D%0A	N%2FA%0D%0A	N%2FA%0D%0A	N%2FA%0D%0A
56	22	FEMALE	5	1	125	NOT+HISPANIC+OR+LATINO	WHITE	USA	USA	Bachelors	4	0	Very+hot+%2F+Scalding	2	Dove%0D%0A	Hands%0D%0A	3%2Fday%0D%0A	N%2FA%0D%0A	N%2FA%0D%0A	N%2FA%0D%0A	N%2FA%0D%0A	N%2FA%0D%0A	N%2FA%0D%0A	TimewiseRepairMicrodermabrasion%0D%0AMaryKayPoreMinimizer%0D%0A	Face%0D%0A	Daily%0D%0A3-4%2Fweek%0D%0A	N%2FA%0D%0A	N%2FA%0D%0A	N%2FA%0D%0A	RedkenColorRestore%0D%0A	Hair%0D%0A	5%2Fweek%0D%0A	N%2FA%0D%0A	N%2FA%0D%0A	N%2FA%0D%0A	N%2FA%0D%0A	N%2FA%0D%0A	N%2FA%0D%0A	SatinHandsMaryKay%0D%0A	Hands%0D%0A	2%2Fweek%0D%0A	N%2FA%0D%0A	N%2FA%0D%0A	N%2FA%0D%0A	N%2FA%0D%0A	N%2FA%0D%0A	N%2FA%0D%0A	N%2FA%0D%0A	N%2FA%0D%0A
57	39	FEMALE	5	3	141	NOT+HISPANIC+OR+LATINO	WHITE	USA	USA	High+School+Diploma	3	0	Fairly+hot	17	Multiple%0D%0A	Hands%0D%0A	10%2Fday%0D%0A	N%2FA%0D%0A	N%2FA%0D%0A	N%2FA%0D%0A	OilofOlay%0D%0AWalmart%0D%0A	Body%0D%0A	3%2Fweek%0D%0A	OilofOlay%0D%0A	Face%0D%0A	7%2Fweek%0D%0A	N%2FA%0D%0A	N%2FA%0D%0A	N%2FA%0D%0A	Garnier%0D%0ATresemme%0D%0A	Hair%0D%0A	3%2Fweek%0D%0A	LeaveinConditioner%0D%0A	Hair%0D%0A	7%2Fweek%0D%0A	N%2FAN%2FA%0D%0A	N%2FA%0D%0A	N%2FA%0D%0A	N%2FA%0D%0A	N%2FA%0D%0A	N%2FA%0D%0A	Jergens%0D%0A	Body%0D%0A	7%2Fweek%0D%0A	N%2FA%0D%0A	N%2FA%0D%0A	N%2FA%0D%0A	N%2FA%0D%0A	N%2FA%0D%0A
58	45	FEMALE	5	8	236	NOT+HISPANIC+OR+LATINO	BLACK+OR+AFRICAN+AMERICAN	United+States	United+States	Doctorate	2	4	Fairly+hot	15	Dialliquid%0D%0AUnknownliwquid(genericatwork)%0D%0A	Hnads%0D%0ALowerarms%0D%0A	Aftereating%0D%0AAfterbathroom%0D%0A	Dove%0D%0A	Body%0D%0A	5-6%2Fweek%0D%0A	N%2FA%0D%0A	N%2FA%0D%0A	N%2FA%0D%0A	AfricanBlackSoap%0D%0A	Face%0D%0ANeck%0D%0A	Daily%0D%0A	N%2FA%0D%0A	N%2FA%0D%0A	N%2FA%0D%0A	N%2FA%0D%0A	N%2FA%0D%0A	N%2FA%0D%0A	SheaButter%0D%0AClarielHerbalEssencesConditioner%0D%0AAlmondandSheaButter%0D%0ATotallyTwisted%0D%0A	Hair%0D%0A	Daily%0D%0A	N%2FA%0D%0A	N%2FA%0D%0A	N%2FA%0D%0A	Neutrogena%0D%0AHydroBoostWaterGel%0D%0A	Face%0D%0ANeck%0D%0A	Daily%0D%0A2%2Fday%0D%0A	MaryKayTimewiseLotion%0D%0A	Body%0D%0A	AsNeeded%0D%0A	N%2FA%0D%0A	N%2FA%0D%0A	N%2FA%0D%0A	N%2FA%0D%0A	N%2FA%0D%0A
59	22	MALE	5	8	150	NOT+HISPANIC+OR+LATINO	OTHER+ASIAN	Nepal	Neoal%2C+Unitee+States	High+School+Diploma	3	0	Lukewarm	15	Dial%0D%0A	Hands%0D%0A	3-4%2Fday%0D%0A	N%2FA%0D%0A	N%2FA%0D%0A	N%2FA%0D%0A	Axe%0D%0A	Body%0D%0A	Once%0D%0A	AcloverFaceGel%0D%0A	Face%0D%0A	Twice%0D%0A	N%2FA%0D%0A	N%2FA%0D%0A	N%2FA%0D%0A	Aveda%0D%0A	Head%0D%0A	Once%0D%0A	Aveda%0D%0A	Hair%0D%0A	Once%0D%0A	Yermit%0D%0A	Hand%0D%0A	Once%0D%0A	N%2FA%0D%0A	N%2FA%0D%0A	N%2FA%0D%0A	N%2FA%0D%0A	N%2FA%0D%0A	N%2FA%0D%0A	N%2FA%0D%0A	N%2FA%0D%0A	N%2FA%0D%0A	N%2FA%0D%0A	N%2FA%0D%0A
60	29	FEMALE	5	2	132	NOT+HISPANIC+OR+LATINO	NATIVE+KOREAN	Jamaica	Jamaica%2C+United+States	High+School	8	3	Fairly+hot	36	Dial%0D%0A	Hands%0D%0A	6%2Fday%0D%0A	Dove%0D%0A	Body%0D%0A	2-3%2Fday%0D%0A	N%2FA%0D%0A	N%2FA%0D%0A	N%2FA%0D%0A	N%2FA%0D%0A	N%2FA%0D%0A	N%2FA%0D%0A	N%2FA%0D%0A	N%2FA%0D%0A	N%2FA%0D%0A	SalonBrand%0D%0A	Hair%0D%0A	1%2Fbiweekly%0D%0A	Coconutoil%0D%0A	Hair%0D%0A	1%2Fbiweekly%0D%0A	Any%0D%0A	Hands%0D%0A	6%2Fday%0D%0A	N%2FA%0D%0A	N%2FA%0D%0A	N%2FA%0D%0A	DoveLotion%0D%0A	Arms%0D%0ALegs%0D%0AFace%0D%0AFeet%0D%0A	Daily%0D%0A	N%2FA%0D%0A	N%2FA%0D%0A	N%2FA%0D%0A	N%2FA%0D%0A	N%2FA%0D%0A
61	34	FEMALE	5	5	255	NOT+HISPANIC+OR+LATINO	BLACK+OR+AFRICAN+AMERICAN	United+States	United+States	Some+college	5	2	Fairly+hot	12	BodyShopHandSoap%0D%0A	Hands%0D%0A	4%2Fday%0D%0A	MethodBarSoap%0D%0ATraderJoe'sTeaTreeSoap%0D%0A	Hands%0D%0AFace%0D%0ABody%0D%0A	1-2%2Fweek%0D%0A	CrystalWaters%0D%0A	Body%0D%0A	5%2Fweek%0D%0A	CetaphilSkinCleanser%0D%0A	Face%0D%0A	7%2Fweek%0D%0A	N%2FA%0D%0A	N%2FA%0D%0A	N%2FA%0D%0A	Dr.Bronner'sMagicSoap%0D%0A	Hair%0D%0A	1%2Fmonth%0D%0A	N%2FA%0D%0A	N%2FA%0D%0A	N%2FA%0D%0A	N%2FA%0D%0A	N%2FA%0D%0A	N%2FA%0D%0A	AveenoDailyMoisture%0D%0A	Body%0D%0AHands%0D%0A	5%2Fweek%0D%0A	HeneFreeRepairLotion%0D%0ATraderJoeBrand%0D%0A	Face%0D%0AFace%0D%0A	3-5%2Fweek%0D%0A	N%2FA%0D%0A	N%2FA%0D%0A	N%2FA%0D%0A	N%2FA%0D%0A	N%2FA%0D%0A
62	24	MALE	5	10	150	NOT+HISPANIC+OR+LATINO	BLACK+OR+AFRICAN+AMERICAN	St+Lucia	St.+Lucia%2C+United+States	Bachelor+of+Science	12	0	Fairly+hot	4	N%2FA%0D%0A	N%2FA%0D%0A	N%2FA%0D%0A	IrishSpring%0D%0A	Body%0D%0A	EveryShower%0D%0A	N%2FA%0D%0A	N%2FA%0D%0A	N%2FA%0D%0A	N%2FA%0D%0A	N%2FA%0D%0A	N%2FA%0D%0A	N%2FA%0D%0A	N%2FA%0D%0A	N%2FA%0D%0A	N%2FA%0D%0A	N%2FA%0D%0A	N%2FA%0D%0A	N%2FA%0D%0A	N%2FA%0D%0A	N%2FA%0D%0A	N%2FA%0D%0A	N%2FA%0D%0A	N%2FA%0D%0A	N%2FA%0D%0A	N%2FA%0D%0A	N%2FA%0D%0A	EqualineBodyLotion%0D%0A	Body%0D%0A	Daily%0D%0A	N%2FA%0D%0A	N%2FA%0D%0A	N%2FA%0D%0A	N%2FA%0D%0A	N%2FA%0D%0A
63	33	MALE	5	9	180	NOT+HISPANIC+OR+LATINO	SAMOAN	Untied+States	United+States%2C+Kuwait%2C+Iraq%2C+Afghanistan%2C+%3F%3F%3F%2C+Norway	Masters	6	0	Fairly+hot	42	EcolabEndure%0D%0A	Hands%0D%0A	Daily%0D%0A	N%2FA%0D%0A	N%2FA%0D%0A	N%2FA%0D%0A	DoveMenCare%0D%0A	Body%0D%0A	Daily%0D%0A	NiveaDeepCleaningFacialScrub%0D%0A	Face%0D%0ANeck%0D%0A	Daily%0D%0A	N%2FA%0D%0A	N%2FA%0D%0A	N%2FA%0D%0A	HeadandShouldersMen%0D%0A	Hair%0D%0A	Everyotherday%0D%0A	LorealConditioner%0D%0A	Hair%0D%0A	EveryOtherDay%0D%0A	Purell%0D%0A	Hands%0D%0A	several%2Fday%0D%0A	N%2FA%0D%0A	N%2FA%0D%0A	N%2FA%0D%0A	N%2FA%0D%0A	N%2FA%0D%0A	N%2FA%0D%0A	NiveaSensitiveShavingGel%0D%0A	Face%0D%0A	Weekdays%0D%0A	N%2FA%0D%0A	N%2FA%0D%0A
64	31	FEMALE	5	10	334	NOT+HISPANIC+OR+LATINO	WHITE	United+States	United+States	Bachelors	5	0	Very+hot+%2F+Scalding	10	BathandBodyWorks%0D%0A	Hands%0D%0A	Frequently%0D%0A	N%2FA%0D%0A	N%2FA%0D%0A	N%2FA%0D%0A	Dove%0D%0A	Body%0D%0A	5%2Fweek%0D%0A	Cetaphil%0D%0A	Face%0D%0A	Morning%0D%0ANight%0D%0A	Lush%0D%0A	Face%0D%0A	2%2Fweek%0D%0A	HeadandShoulders%0D%0A	Head%0D%0A	5days%2Fweek%0D%0A	Detangler%0D%0A	Head%0D%0A	5%2Fweek%0D%0A	GermEx%0D%0A	Hands%0D%0A	2%2Fday%0D%0A	BathandBodyWorks%0D%0A	Body%0D%0AHands%0D%0A	Daily%0D%0A	Cetaphil%0D%0A	Face%0D%0A	Morning%0D%0ANight%0D%0A	N%2FA%0D%0A	N%2FA%0D%0A	N%2FA%0D%0A	N%2FA%0D%0A	N%2FA%0D%0A
65	27	FEMALE	5	2	200	NOT+HISPANIC+OR+LATINO	WHITE	Germany	Germany%2C+Belgium%2C+Korea	College	3	3	Very+hot+%2F+Scalding	8	Dial%0D%0ASoftSoap%0D%0A	Hands%0D%0A	1%2Fhour(9-5)%0D%0A	Dove%0D%0A	Everywhere%0D%0A	3%2Fweek%0D%0A	BathandBody%0D%0ADove%0D%0A	Notvagina%0D%0ABody%0D%0A	3%2Fweek%0D%0A	N%2FA%0D%0A	N%2FA%0D%0A	N%2FA%0D%0A	SheaMoisturizer%0D%0A	Noteyes%0D%0A	1%2Fmonth%0D%0A	Treseme%0D%0ASheaMoisturizer%0D%0A	Hair%0D%0A	1%2Fweek%0D%0AEverotherweekifhairisbraided%0D%0A	CoconutOil%0D%0ACantuLeaveInConditioner%0D%0A	Hair%0D%0A	2%2Fweek(unlesshairisbraided)%0D%0A	Purell%0D%0ABathandBodyWorks%0D%0A	Hands%0D%0A	Daily%0D%0AAtleast18%2Fday%0D%0A	N%2FA%0D%0A	N%2FA%0D%0A	N%2FA%0D%0A	GoldBondDiabetics%0D%0A	Body%0D%0AFace%0D%0A	3-4%2Fweek%0D%0A	N%2FA%0D%0A	N%2FA%0D%0A	N%2FA%0D%0A	N%2FA%0D%0A	N%2FA%0D%0A
66	29	FEMALE	5	3	154	NOT+HISPANIC+OR+LATINO	BLACK+OR+AFRICAN+AMERICAN	United+States	USA	College+graduate	14	0	Fairly+hot	15	Dial%0D%0ABathandBodyWorks%0D%0A	Hands%0D%0AWrists%0D%0A	Frequently%0D%0A	N%2FA%0D%0A	N%2FA%0D%0A	N%2FA%0D%0A	Suave%0D%0ABathandBodyWorks%0D%0A	Body%0D%0A	Everyday%0D%0A	ClearPoreCleanser%0D%0A	Face%0D%0A	Everymorning%0D%0A	N%2FA%0D%0A	N%2FA%0D%0A	N%2FA%0D%0A	HerbalEssence%0D%0A	Hair%0D%0A	2%2Fmonth%0D%0A	BathandBodyWorksFragranceMist%0D%0A	Body%0D%0A	Everynight%2Fmorning%0D%0A	Purell%0D%0A	Hands%0D%0A	N%2FA%0D%0A	CetaphilDailyMoisturizer%0D%0A	Face%0D%0A	Everymorning%0D%0A	SuaveCocoaButterLotion%0D%0A	Body%0D%0AFeet%0D%0A	Daily%0D%0A	N%2FA%0D%0A	N%2FA%0D%0A	N%2FA%0D%0A	N%2FA%0D%0A	N%2FA%0D%0A
67	30	FEMALE	5	9	145	NOT+HISPANIC+OR+LATINO	BLACK+OR+AFRICAN+AMERICAN	Nigeria	Nigera%2CUnited+States+		5	5	Fairly+hot	10	N%2FA%0D%0A	N%2FA%0D%0A	N%2FA%0D%0A	55HT%0D%0A	Face%0D%0ABody%0D%0A	Daily%0D%0A	N%2FA%0D%0A	N%2FA%0D%0A	N%2FA%0D%0A	N%2FA%0D%0A	N%2FA%0D%0A	v%0D%0A	Biore%0D%0A	Face%0D%0A	3%2Fweek%0D%0A	Suave%0D%0A	Hair%0D%0A	Daily%0D%0A	ArganOil%0D%0A	Hair%0D%0A	Daily%0D%0A	N%2FA%0D%0A	N%2FA%0D%0A	N%2FA%0D%0A	N%2FA%0D%0A	N%2FA%0D%0A	N%2FA%0D%0A	N%2FA%0D%0A	N%2FA%0D%0A	N%2FA%0D%0A	N%2FA%0D%0A	N%2FA%0D%0A	N%2FA%0D%0A	N%2FA%0D%0A	N%2FA%0D%0A
68	28	MALE	5	11	195	NOT+HISPANIC+OR+LATINO	WHITE	United+States	United+States	Bachelors	7	0	Fairly+hot	0	EcolabEndureFoam%0D%0ADial%0D%0A	Hands%0D%0Awrists%0D%0A	25%2Fday%0D%0A5%2Fday%0D%0A	N%2FA%0D%0A	N%2FA%0D%0A	N%2FA%0D%0A	DoveDeepMoisture%0D%0A	Body%0D%0AHead%0D%0A	Daily%0D%0A	NeutrogenaAll-In-OneAcneControlDailyScrub%0D%0A	Face%0D%0ANeck%0D%0AArms%0D%0AShoulders%0D%0ABack%0D%0AChest%0D%0A	daily%0D%0A	N%2FA%0D%0A	N%2FA%0D%0A	N%2FA%0D%0A	HeadandShoulders%0D%0A	Hair%0D%0AScalp%0D%0A	daily%0D%0A	N%2FA%0D%0A	N%2FA%0D%0A	N%2FA%0D%0A	Purell%0D%0A	Hands%0D%0AWrist%0D%0A	50%2Fday%0D%0A	N%2FA%0D%0A	N%2FA%0D%0A	N%2FA%0D%0A	MedlineRemedySkinRepairCream%0D%0ALubridermDailyMoistureLotion(fragrancefree)%0D%0A	Hands%2Fwrist%0D%0AFace%0D%0ANeck%0D%0AArms%0D%0AChest%0D%0ABakc%0D%0A	3%2Fday%0D%0A1%2Fday%0D%0A	DoveSensitiveShaveGel%0D%0A	Face%0D%0A	1%2Fweek%0D%0A	N%2FA%0D%0A	N%2FA%0D%0A
69	45	FEMALE	5	2	196	NOT+HISPANIC+OR+LATINO	BLACK+OR+AFRICAN+AMERICAN	United+States	USA	Freshman+Highschool	3	3	Fairly+hot	10	Dove%0D%0A	Body%0D%0A	Daily%0D%0A	Dove%0D%0A	Body%0D%0A	3%2Fweek%0D%0A	Dove%0D%0A	Body%0D%0A	2%2Fweek%0D%0A	Dove%0D%0A	Face%0D%0A	3%2Fweek%0D%0A	N%2FA%0D%0A	N%2FA%0D%0A	N%2FA%0D%0A	CremeofNature%0D%0A	Hair%0D%0A	1%2Fweek%0D%0A	Kemioylherbalgrowcastoroil%0D%0A	Hair%0D%0AScalp%0D%0A	1%2Fweek%0D%0A	N%2FA%0D%0A	N%2FA%0D%0A	N%2FA%0D%0A	JohnsonBabyLotion%0D%0A	Arms%0D%0ALegs%0D%0A	3%2Fweek%0D%0A	N%2FA%0D%0A	N%2FA%0D%0A	N%2FA%0D%0A	N%2FA%0D%0A	N%2FA%0D%0A	N%2FA%0D%0A	BabyOil%0D%0A	Feet%0D%0A
70	45	FEMALE	5	3	230	NOT+HISPANIC+OR+LATINO	BLACK+OR+AFRICAN+AMERICAN	United+States	USA	AAS	7	2	Fairly+hot	6	Dawn%0D%0ADove%0D%0A	Hands%0D%0A	3%2Fday%0D%0A	Peppermint%2FLilac%0D%0ADove%0D%0A	Body%0D%0AFeet%0D%0AFace%0D%0A	2%2Fday%0D%0A	Neutrogena%0D%0ARainbato%0D%0A	Body%0D%0A	2%2Fday%0D%0A	H20Dove%0D%0APeppermintsoap%0D%0A	Face%0D%0A	2%2Fday%0D%0A	N%2FA%0D%0A	N%2FA%0D%0A	N%2FA%0D%0A	MiracleGro%0D%0A	Head%0D%0A	1%2Fweek%0D%0A	OliveOil%0D%0APeppermint%0D%0APaulMitchell%0D%0A	Hair%0D%0A	Daily%0D%0AMonthly%0D%0AAsneeded%0D%0A	Publicaccess%0D%0A	Hands%0D%0A	Asneeded%0D%0A	Sheabutter%0D%0A	Body%0D%0AFeet%0D%0A	2%2Fday%0D%0A	Sheabutter%0D%0A	Body%0D%0AFeet%0D%0A	Asneeded%0D%0A	N%2FA%0D%0A	N%2FA%0D%0A	N%2FA%0D%0A	N%2FA%0D%0A	N%2FA%0D%0A
[truncated: 404 more columns]

## Sheet: ST2_RepresentativeIsolates
Genus/Tax	Isolate_name	Sequence	Growth
Acinetobacter	AF056_001	tattagtgggggacaacgttccgaaaggagcgctaataccgcatacgtcctacgggagaaagcaggggacctttgggccttgcgctaatagatgagcctaagtcggattagctagttggtagggtaaaggcctaccaaggcgacgatctgtagcgggtctgagaggatgatccgccacactgggactgagacacggcccagactcctacgggaggcagcagtggggaatattggacaatggggggaaccctgatccagccatgccgcgtgtgtgaagaaggccttttggttgtaaagcactttaagcgaggaggaggctacctagattaatactttaggatagtggacgttactcgcagaataagcaccggctaactctgtgccagcagccgcggtaat…	Overnight
Acinetobacter	AM058_018	cctggntggggaactccatctcgggagggatgctaataccgcatacgtcctacgggagaaagcaggggatcttcggaccttgcgctaatagatgagcctaagtcggattagctagttggtggggtaaaggcctaccaaggcgacgatctgtagcgggtctgagaggatgatccgccacactgggactgagacacggcccagactcctacgggaggcagcagtggggaatattggacaatgggcgcaagcctgatccagccatgccgcgtgtgtgaagaaggccttatggttgtaaagcactttaagcgaggaggaggctactttagataatacctagagatagtggacgttactcgcagaataagcaccggctaactctgtgccagcagccgcggtaat…	Overnight
Acinetobacter	FM056_001	tattagtgggggacaacatttcgaaagggatgctaataccgcatacgtcctacgggagaaagcaggggatcttcggaccttgcgctaatagatgagcctaagtcggattagctagttggtggggtaaaggcctaccaaggcgacgatctgtagcgggtctgagaggatgatccgccacactgggactgagacacggcccagactcctacgggaggcagcagtggggaatattggacaatggggggaaccctgatccagccatgccgcgtgtgtgaagaaggccttatggttgtaaagcactttaagcgaggaggagggtactggtattaatactaccaggtactggacgttactcgcagaataagcaccggctaactctgtgccagcagccgcggtaat…	Overnight
Acinetobacter lwoffii	FM058_005	tattagtgggggacaacatctcgaaagggatgctaataccgcatacgtcctacgggagaaagcaggggaccttcgggccttgcgctaatagatgagcctaagtcggattagctagttggtggggtaaaggcctaccaaggcgacgatctgtagcgggtctgagaggatgatccgccacactgggactgagacacggcccagactcctacgggaggcagcagtggggaatattggacaatggggggaaccctgatccagccatgccgcgtgtgtgaagaaggccttttggttgtaaagcactttaagcgaggaggaggctaccgagattaatactcttggatagtggacgttactcgcagaataagcaccggctaactctgtgccagcagccgcggtaat…	Overnight
Arthrobacter	AF065_001	TTTTTGGGATTAGCTCCACCTCACAGTATCGCAACCCTTTGTACCGGCCATTGTAGCATGCGTGAAGCCCAAGACATAAGGGGCATGATGATTTGACGTCGTCCCCACCTTCCTCCGAGTTGACCCCGGCAGTCTCCTATGAGTCCCCACCATCACGTGCTGGCAACATAGAACGAGGGTTGCGCTCGTTGCGGGACTTAACCCAACATCTCACGACACGAGCTGACGACAACCATGCACCACCTGTAAACCGACCGCAAGCGGGGCACCTGTCTCCAGGTATTACCGGTTCATGTCAAGCCTTGGTAAGGTTCTTCGCGTTGCATCGAATTAATCCGCATGCTCCGCCGCTTGTGCGGGCCCCCGTCAATTCCTTTGAGTTTTAGCCTTGCGGCCGTA…	Overnight
Bacillus	AF054_003	tgtaagactgggataactccgggaaaccggagctaataccggatagttccttgaaccgcatggttcaaggatgaaagacggtttcggctgtcacttacagatggacccgcggcgcattagctagttggtggggtaatggctcaccaaggcgacgatgcgtagccgacctgagagggtgatcggccacactgggactgagacacggcccagactcctacgggaggcagcagtagggaatcttccgcaatggacgaaagtctgacggagcaacgccgcgtgagtgatgaaggttttcggatcgtaaagctctgttgttagggaagaacaagtgcgagagtaactgctcgcaccttgacggtacctaaccagaaagccacggctaactacgtgccagcagcc…	Overnight
Bacillus flexus	AF055_006	tgtaagactgggataacttcgggaaaccgaagctaataccggataggatcttctccttcatgggagatgattgaaagatggtttcggctatcacttacagatgggcccgcggtgcattagctagttggtgaggtaacggctcaccaaggcaacgatgcatagccgacctgagagggtgatcggccacactgggactgagacacggcccagactcctacgggaggcagcagtagggaatcttccgcaatggacgaaagtctgacggagcaacgccgcgtgagtgatgaaggctttcgggtcgtaaaactctgttgttagggaagaacaagtacaagagtaactgcttgtaccttgacggtacctaaccagaaagccacggctaactacgtgccagcagcc…	Overnight
Brevundimonas	AM066_402	cgtagntcgtaacacggtagggttcggtcttactcagggaaacttgtgctaataccgaatgtgcccttcgggggaaagatttatcgccattagagcggcccgcgtctgattagctagttggtgaggtaaaggctcaccaaggcgacgatcagtagctggtctgagaggatgaccagccacactgggactgagacacggcccagactcctacgggaggcagcagtggggaatcttgcgcaatgggcgaaagcctgacgcagccatgccgcgtgaatgatgaaggtcttaggattgtaaaattctttcaccggggacgataatgacggtacccggagaagaagccccggctaacttcgtgccagcagccgcggtaatacgaagggggctagcgttgctcgg…	Overnight
Curtobacterium	FM057_001	cctgactctgggataagcgttggaaacgacgtctaatactggatatgatcactggccgcatggtctggtggtggaaagattttttggttggggatggactcgcggcctatcagcttgttggtgaggtaatggctcaccaaggcgacgacgggtagccggcctgagagggtgaccggccacactgggactgagacacggcccagactcctacgggaggcagcagtggggaatattgcacaatgggcgaaagcctgatgcagcaacgccgcgtgagggatgacggccttcgggttgtaaacctcttttagtagggaagaagcgaaagtgacggtacctgcagaaaaagcaccggctaactacgtgccagcagccgcggtaatacgtagggtgcaagcgttg…	Overnight
Dermabacter	FM060_104	ctccactttgggataactccgagaaatcggggctaatactggatatgactatggcccgcatgggttgtggtggaaagtttttcggtgggggatgggctcgcggcctatcagtttgttggtgaggtagtggctcaccaaggcgatgacgggtagccggcctgagagggcgaccggccacactgggactgagacacggcccagactcctacgggaggcagcagtggggaatattgcacaatgggcgaaagcctgatgcagcgacgccgcgtgggggatgacggccttcgggttgtaaacctctttcagcaaggaagaagcgaaagtgacggtacttgcagaagaagcgccggctaactacgtgccagcagccgcggtaatacgtagggcgcaagcgttgtc…	Overnight
Enhydrobacter	AF055_004	tagtagtgggggatagctcggggaaactcgaattaataccgcatacgacctacgggtgaaagggggcgcaagctcttgctattagatgagcctaaatcagattagctagttggtggggtaaaggcccaccaaggcgacgatctgtaactggtctgagaggatgatcagtcacaccggaactgagacacggtccggactcctacgggaggcagcagtggggaatattggacaatgggggcaaccctgatccagccatgccgcgtgtgtgaagaaggccttttggttgtaaagcactttaagcagggaggagaggctaatggttaatacccattagattagacgttacctgcagaataagcaccggctaactctgtgccagcagccgcggtaatacagagg…	Overnight
Erwinia	FM058_002	cgatggagggggataactactggaaacggtagctaataccgcataacgtcgcaagaccaaagtgggggaccttcgggcctcacaccatcggatgtgcccagatgggattagctagtaggtggggtaacggctcacctaggcgacgatccctagctggtctgagaggatgaccagccacactggaactgagacacggtccagactcctacgggaggcagcagtggggaatattgcacaatgggcgcaagcctgatgcagccatgccgcgtgtatgaagaaggccttcgggttgtaaagtactttcagcggggaggaaggcgacgcggttaataaccgcgtcgattgacgttacccgcagaagaagcaccggctaactccgtgccagcagccgcggtaata…	Overnight
f__Micrococcaceae	AF058_003	cttaactctgggataagcctgggaaactgggtctaataccggatatgactcctcatcgcatggtggggggtggaaagctttattgtggttttggatggactcgcggcctatcagcttgttggtgaggtaatggcttaccaaggcgacgacgggtagccggcctgagagggtgaccggccacactgggactgagacacggcccagactcctacgggaggcagcagtggggaatattgcacaatgggcgcaagcctgatgcagcgacgccgcgtgagggatgacggccttcgggttgtaaacctctttcagtagggaagaagcgaaagtgacggtacctgcagaagaagcgccggctaactacgtgccagcagccgcggtaatacgtagggcgcaagcgtt…	Overnight
f__Bacillaceae	AF054_024	cataagactgggataactccgggaaaccggggctaataccggataatattttgaactgcatggttcgaaattgaaaggcggcttcggctgtcacttatggatggacccgcgtcgcattagctagttggtgaggtaacggctcaccaaggcaacgatgcgtagccgacctgagagggtgatcggccacactgggactgagacacggcccagactcctacgggaggcagcagtagggaatcttccgcaatggacgaaagtctgacggagcaacgccgcgtgagtgatgaaggctttcgggtcgtaaaactctgttgttagggaagaacaagtgctagttgaataagctggcaccttgacggtacctaaccagaaagccacggctaactacgtgccagcagc…	Overnight
Kocuria	FM054_004	cttgactctgggataagcctgggaaactgggtctaatactggatatgacctcctgtcgcatggtggggggtggaaagggtttgtactggttgtggatgggctcacggcctatcagcttgttggtggggtaatggcctaccaaggcgacgacgggtagccggcctgagagggtgaccggccacactgggactgagacacggcccagactcctacgggaggcagcagtggggaatattgcacaatgggcgcaagcctgatgcagcgacgccgcgtgagggatgacggccttcgggttgtaaacctctttcagcacggaagaagcgaaagtgacggtacgtgcagaagaagcgccggctaactacgtgccagcagccgcggtaatacgtagggcgcaagcgt…	Overnight
Lysinibacillus boronitoleran	AM060_001	ctatagtttgggataactccgggaaaccggggctaataccgaataatctcttttgcttcatggtgaaagactgaaagacggtttcggctgtcgctataggatgggcccgcggcgcattagctagttggtgaggtaacggctcaccaaggcgacgatgcgtagccgacctgagagggtgatcggccacactgggactgagacacggcccagactcctacgggaggcagcagtagggaatcttccacaatgggcgaaagcctgatggagcaacgccgcgtgagtgaagaaggttttcggatcgtaaaactctgttgtaagggaagaacaagtacagtagtaactggctgtaccttgacggtaccttattagaaagccacggctaactacgtgccagcagcc…	Overnight
Microbacterium	AM057_004	ctggactctgggataagcgctggaaacggcgtctaatactggatatgagccccttccgcatggtgggggttggaaagattttttggtctgggatgggctcgcggcctatcagcttgttggtgaggtaatggctcaccaaggcgtcgacgggtagccggcctgagagggtgaccggccacactgggactgagacacggcccagactcctacgggaggcagcagtggggaatattgcacaatgggcggaagcctgatgcagcaacgccgcgtgagggatgacggccttcgggttgtaaacctcttttagcagggaagaagcgagagtgacggtacctgcagaaaaagcgccggctaactacgtgccagcagccgcggtaatacgtagggcgcaagcgttat…	Overnight
Micrococcus	FM055_016	GACCGGCTTTTTGGGATTAGCTCCACCTCACAGTATCGCAACCCATTGTACCGGCCATTGTAGCATGCGTGAAGCCCAAGACATAAGGGGCATGATGATTTGACGTCGTCCTCACCTTCCTCCGAGTTGACCCCGGCAGTCTTCCATGAGTCCCCACCATTACGTGCTGGCAACATGGAACGAGGGTTGCGCTCGTTGCGGGACTTAACCCAACATCTCACGACACGAGCTGACGACAACCATGCACCACCTGTGAACCCGCCCCAAAGGGGAAACCGTATCTCTACGGCGATCGAGAAC	Overnight
Paenibacillus	FM054_001	cttcagactgggataactaccggaaacggtagctaataccggataatttcttttttctcctgagagaagaatgaaagacggagcaatctgtcactgagggatgggcctgcggcgcattagctagttggtggggtaacggcccaccaaggcgacgatgcgtagccgacctgagagggtgaacggccacactgggactgagacacggcccagactcctacgggaggcagcagtagggaatcttccgcaatgggcgaaagcctgacggagcaacgccgcgtgagtgatgaaggttttcggatcgtaaagctctgttgccagggaagaacgtccggtagagtaactgctaccggagtgacggtacctgagaagaaagccccggctaactacgtgccagcagcc…	Overnight
Pseudomonas	AF058_004	tagtagtgggggacaacgtttcgaaaggaacgctaataccgcatacgtcctacgggagaaagtgggggatcttcggacctcacgctattagatgagcctaggtcggattagctagttggtagggtaaaggcctaccaaggcgacgatccgtaactggtctgagaggatgatcagtcacactggaactgagacacggtccagactcctacgggaggcagcagtggggaatattggacaatgggcgaaagcctgatccagccatgccgcgtgtgtgaagaaggccttcgggtcgtaaagcactttaagttgggaggaagggctcatagcgaatacctgtgagttttgacgttaccaacagaataagcaccggctaacttcgtgccagcagccgcggtaata…	Overnight
Pseudomonas	FM058_015	tagtagtgggggacaacgtttcgaaaggaacgctaataccgcatacgtcctacgggagaaagtgggggatcttcggacctcacgctattagatgagcctaggtcggattagctagttggtagggtaaaggcctaccaaggcgacgatccgtaactggtctgagaggatgatcagtcacactggaactgagacacggtccagactcctacgggaggcagcagtggggaatattggacaatgggcgaaagcctgatccagccatgccgcgtgtgtgaagaaggccttcgggtcgtaaagcactttaagttgggaggaagggctcatagcgaatacctgtgagttttgacgttaccaacagaataagcaccggctaacttcgtgccagcagccgcggtaata…	Overnight
Staphylococcus	AF063_402	tataanactgggataacttcgggaaaccggagctaataccggataacatttggaaccgcatggttctaaagtgaaagatggttttgctatcacttatagatggacccgcgccgtattagctagttggtaaggtaacggcttaccaaggcgacgatacgtagccgacctgagagggtgatcggccacactggaactgagacacggtccagactcctacgggaggcagcagtagggaatcttccgcaatgggcgaaagcctgacggagcaacgccgcgtgagtgatgaagggtttcggctcgtaaaactctgttattagggaagaacaaacgtgtaagtaactgtgcacgtcttgacggtacctaatcagaaagccacggctaactacgtgccagcagccg…	Overnight
Staphylococcus	AF065_002	tataagactgggataacttcgggaaaccggagctaataccggataatatttcgaaccgcatggttcgatagtgaaagatggctttgctatcacttatagatggacctgcgccgtattagctagttggtaaggtaacggcttaccaaggcaacgatacgtagccgacctgagagggtgatcggccacactggaactgagacacggtccagactcctacgggaggcagcagtagggaatcttccgcaatgggcgaaagcctgacggagcaacgccgcgtgagtgatgaaggtcttcggatcgtaaaactctgttattagggaagaacaaacgtgtaagtaactgtgcacgtcttgacggtacctaatcagaaagccacggctaactacgtgccagcagccg…	Overnight
Staphylococcus epidermidis	FM057_002	tataagactgggataacttcgggaaaccggagctaataccggataatatattgaaccgcatggttcaatagtgaaagacggttttgctgtcacttatagatggatccgcgccgcattagctagttggtaaggtaacggcttaccaaggcaacgatgcgtagccgacctgagagggtgatcggccacactggaactgagacacggtccagactcctacgggaggcagcagtagggaatcttccgcaatgggcgaaagcctgacggagcaacgccgcgtgagtgatgaaggtcttcggatcgtaaaactctgttattagggaagaacaaatgtgtaagtaactatgcacgtcttgacggtacctaatcagaaagccacggctaactacgtgccagcagccg…	Overnight
Staphylococcus epidermidis	AM059_003	tataagactgggataacttcgggaaaccggagctaataccggataacatgttgaaccgcatggttcaacagtgaaagacggtcttgctgtcacttatagatggatccgcgccgcattagctagttggtaaggtaacggcttaccaaggcaacgatgcgtagccgacctgagagggtgatcggccacactggaactgagacacggtccagactcctacgggaggcagcagtagggaatcttccgcaatgggcgaaagcctgacggagcaacgccgcgtgagtgaagaaggtcttcggatcgtaaaactctgttattagggaagaacaaatgtgtaagtaactatgcacgtcttgacggtacctaatcagaaagccacggctaactacgtgccagcagccg…	Overnight
Staphylococcus epidermidis;	AF055_012	tataagactgggataacttcgggaaaccggagctaataccggataacatgttgaaccgcatggttcaacagtgaaagacggtcttgctgtcacttatagatggatccgcgccgcattagctagttggtaaggtaacggcttaccaaggcaacgatgcgtagccgacctgagagggtgatcggccacactggaactgagacacggtccagactcctacgggaggcagcagtagggaatcttccgcaatgggcgaaagcctgacggagcaacgccgcgtgagtgaagaaggtcttcggatcgtaaaactctgttattagggaagaacaaatgtgtaagtaactatgcacgtcttgacggtacctaatcagaaagccacggctaactacgtgccagcagccg…	Overnight
Staphylococcus haemolyticus	FM059_003	tataagactgggataacttcgggaaaccggagctaataccggataatatttcgaaccgcatggttcgatagtgaaagatggttttgctatcacttatagatggacccgcgccgtattagctagttggtaaggtaacggcttaccaaggcgacgatacgtagccgacctgagagggtgatcggccacactggaactgagacacggtccagactcctacgggaggcagcagtagggaatcttccgcaatgggcgaaagcctgacggagcaacgccgcgtgagtgatgaaggtcttcggatcgtaaaactctgttattagggaagaacatacgtgtaagtaactatgcacgtcttgacggtacctaatcagaaagccacggctaactacgtgccagcagccg…	Overnight
Stenotrophomonas	FM058_009	ctggcatgggggataacgtanggaaacttacgctaataccgcatacgacctacgggtgaaagcaggggaccttcgggccttgcgcgattgaatgagccgatgtcggattagctagttggcggggtaaaggcccaccaaggcgacgatccgtagctggtctgagaggatgatcagccacactggaactgagacacggtccagactcctacgggaggcagcagtggggaatattggacaatgggcgcaagcctgatccagccataccgcgtgggtgaagaaggccttcgggttgtaaagcccttttgttgggaaagaaatccagctggctaatacccggttgggatgacggtacccaaagaataagcaccggctaacttcgtgccagcagccgcggtaata…	Overnight
Streptococcus luteciae	AF062_002	tactagcgggggataactattggaaacgatagctaataccgcataacagcatttaacccatgttagatgcttgaaagaagcaattgcttcactagtagatggacctgcgttgtattagctagttggtgaggtaacggctcaccaaggcgacgatacatagccgacctgagagggtgatcggccacactgggactgagacacggcccagactcctacgggaggcagcagtagggaatcttcggcaatgggggcaaccctgaccgagcaacgccgcgtgagtgaagaaggttttcggatcgtaaagctctgttgtaagagaagaacgtgtgtgagagtggaaagttcacacagtgacggtaacttaccagaaagggacggctaactacgtgccagcagccg…	Overnight
Staphylococcus epidermidis	AM066_103	tataagactgggataacttcgggaaaccggagctaataccggataacatgttgaaccgcatggttcaacagtgaaagacggtcttgctgtcacttatagatggatccgcgccgcattagctagttggtaaggtaacggcttaccaaggcaacgatgcgtagccgacctgagagggtgatcggccacactggaactgagacacggtccagactcctacgggaggcagcagtagggaatcttccgcaatgggcgaaagcctgacggagcaacgccgcgtgagtgaagaaggtcttcggatcgtaaaactctgttattagggaagaacaaatgtgtaagtaactatgcacgtcttgacggtacctaatcagaaagccacggctaactacgtgccagcagccg…	Overnight
Staphylococcus epidermidis	FM060_101	tataagactgggataacttcgggaaaccggagctaataccggataacatgttgaaccgcatggttcaacagtgaaagacggtcttgctgtcacttatagatggatccgcgccgcattagctagttggtaaggtaacggcttaccaaggcaacgatgcgtagccgacctgagagggtgatcggccacactggaactgagacacggtccagactcctacgggaggcagcagtagggaatcttccgcaatgggcgaaagcctgacggagcaacgccgcgtgagtgaagaaggtcttcggatcgtaaaactctgttattagggaagaacaaatgtgtaagtaactatgcacgtcttgacggtacctaatcagaaagccacggctaactacgtgccagcagccg…	Overnight
Bacillus	AF064_002	tgtaagactgggataactccgggaaaccggagctaataccggatagttccttgaaccgcatggttcaaggatgaaagacggtttcggctgtcacttacagatggacccgcggcgcattagctagttggtgaggtaacggctcaccaaggcgacgatgcgtagccgacctgagagggtgatcggccacactgggactgagacacggcccagactcctacgggaggcagcagtagggaatcttccgcaatggacgaaagtctgacggagcaacgccgcgtgagtgatgaaggttttcggatcgtaaagctctgttgttagggaagaacaagtgcaagagtaactgcttgcaccttgacggtacctaaccagaaagccacggctaactacgtgccagcagcc…	Overnight
Bacillus	AF070_101	ggcaaggtagagctaaatccgggaaacntgggtcaaaaccgggtggttgtttgaaccgcatggttcagacataaaaggtggcttcggctaccacttacagatggacccgcggcgcattagctagttggtgaggtaacggctcaccaaggcaacgatgcgtagccgacctgagagggtgatcggccacactgggactgagacacggcccagactcctacgggaggcagcagtagggaatcttccgcaatggacgaaagtctgacggagcaacgccgcgtgagtgatgaaggttttcggatcgtaaagctctgttgttagggaagaacaagtgccgttcaaatagggcggcaccttgacggtacctaaccagaaagccacggctaactacgtgccagcagc…	Overnight
Staphylococcus	AF057_005	tataagactgggataacttcgggaaaccggagctaataccggataatattttgaaccgcatggttcaaaagtgaaagacggtcttgctgtcacttatagatggatccgcgctgcattagctagttggtaaggtaacggcttaccaaggcaacgatgcatagccgacctgagagggtgatcggccacactggaactgagacacggtccagactcctacgggaggcagcagtagggaatcttccgcaatgggcgaaagcctgacggagcaacgccgcgtgagtgatgaaggtcttcggatcgtaaaactctgttattagggaagaacatatgtgtaagtaactgtgcacatcttgacggtacctaatcagaaagccacggctaactacgtgccagcagccg…	Overnight
Dermacoccus	AF068_016	cctcactctgggataagcctgggaaactgggtctaatactggatacgaccgatctccgcatggagtgttggtggaaagtttttgtggtgggggatggactcgcggcctatcagcttgttggtggggtaatggcctaccaaggcgacgacgggtagccggcctgagagggcgaccggccacactgggactgagacacggcccagactcctacgggaggcagcagtggggaatattgcacaatgggcgaaagcctgatgcagcgacgccgcgtgagggatgacggccttcgggttgtaaacctctttcaccagggacgaagctaacgtgacggtacctggagaagaagcaccggctaactacgtgccagcagccgcggtaatacgtagggtgcgagcgttg…	Overnight
f__Planococcaceae;	AF054_005	ctgtagattgggataactccgggaaaccggggctaataccgaataatccatttcctcacatgtggagatgttaaaagacggtttcgcgctgtccctacnggaggggcccgcggcgcattacctagttggggaggtaacggctcaccaaggcaacaatgcgtacccaacctgaaagggggatcggccacccggggactgaaacccggcccaaactcctacgggaggcaccattagggaatcttccacaagggacaaaagtctgatggaccaccgccccgggagtgaaaaaggttttcggatcgtaaaactctgttgtgaggaaaaaanaattacaaaagtacctgctcgtaccttgacggtacctcattaaaaagccacggctaactacgtgccagcagc…	Overnight
Staphylococcus	AF056_011	tataagactgggataacttcgggaaaccggagctaataccggataatatttcgaaccgcatggttcgatagtgaaagatggctctgctatcacttatagatggacctgcgccgtattagctagttggtaaggtaacggcttaccaaggcaacgatacgtagccgacctgagagggtgatcggccacactggaactgagacacggtccagactcctacgggaggcagcagtagggaatcttccgcaatgggcgaaagcctgacggagcaacgccgcgtgagtgatgaaggtcttcggatcgtaaaactctgttattagggaagaacaaacgtgtaagtaactgtgcacgtcttgacggtacctaatcagaaagccacggctaactacgtgccagcagccg…	Overnight
Staphylococcus warneri	AF058_008	tataagactggaataacttcgggaaaccgaagctaatgccggataacatgtagaaccgcatggttctacagtgaaagatggccttgctatcacttatagatggacccgcgccgtattagctagttggtaaggtaacggcttaccaaggcaacgatacgtagccgacctgagagggtgatcggccacactggaactgagacacggtccagactcctacgggaggcagcagtagggaatcttccgcaatgggcgaaagcctgacggagcaacgccgcgtgagtgatgaaggtcttcggatcgtaaagctctgttattagggaagaacaagtgcgtaagtaactgtgcgcaccttgacggtacctaatcagaaagccacggctaactacgtgccagcagccg…	Overnight
Staphylococcus epidermidis	AM064_002	tataagactgggataacttcgggaaaccggagctaataccggataatatattgaaccgcatggttcaatagtgaaagacggttttgctgtcacttatagatggatccgcgccgcattagctagttggtaaggtaacggcttaccaaggcaacgatgcgtagccgacctgagagggtgatcggccacactggaactgagacacggtccagactcctacgggaggcagcagtagggaatcttccgcaatgggcgaaagcctgacggagcaacgccgcgtgagtgatgaaggtcttcggatcgtaaaactctgttattagggaagaacaaatgtgtaagtaactatgcacgtcttgacggtacctaatcagaaagccacggctaactacgtgccagcagccg…	Overnight
Aerococcus	FM058_006	tataagcgggggataacattcggaaacgggtgctaataccgcataatatcttcttccgcatggaagaagattgaaagacggctctgctgtcacttatggatgaccttgcggtgcattagttagttggtggggtaatggcctaccaagacgatgatgcatagccgacctgagagggtgatcggccacattgggactgagacacggcccaaactcctacgggaggcagcagtagggaatcttccgcaatgggcgaaagcctgacggagcaatgccgcgtgagtgaagaaggccttcgggtcgtaaaactctgttataagagaagaacaaattgtagagtaactgctacagtcttgacggtatcttatcagaaagccacggctaactacgtgccagcagccg…	Overnight
Aerococcus	AF066_409	gacaaggtagatcttaaccctgtagaggtaaatcttaaccaggtaaacttaaatcctaacnnggtanaanatagaaagacggctctgctgtcacttatagatgaccttgcggtgcattagttagttggtggggtaacggcctaccaagacgatgatgcatagccgacctgagagggtgatcggccacattgggactgagacacggcccaaactcctacgggaggcagcagtagggaatcttccgcaatgggcgaaagcctgacggagcaatgccgcgtgagtgaagaaggccttcgggtcgtaaaactctgttataagagaagaacaaattgtagagtaactgctacagtcttgacggtatcttatcagaaagccacggctaactacgtgccagcagcc…	Overnight
Agromyces	AF066_408	aatcctgacnaggtagatcttaaccaggtagcggtaaatcttaacaatgtaaccttgaaccgtatggtttggggtggaaagtttttcggtctgggatggactcgcggcctatcagcttgttggtgaggtaatggctcaccaaggcgtcgacgggtagccggcctgagagggtgaccggccacactgggactgagacacggcccagactcctacgggaggcagcagtggggaatattgcacaatgggcgcaagcctgatgcagcaacgccgcgtgcgggatgacggccttcgggttgtaaaccgcttttagtaaggaagaagggaagcttgcttcttgacggtacttgcagaaaaaggaccggctaactacgtgccagcagccgcggtaatacgtagggt…	72h
Brevibacterium	AF054_017	cctgactctgggataagcccgggaaactgggtctaataccggatatgaccattctccgcatggagtggtggtggaaagtttttcggttggggatgggctcgcggcctatcagcttgttggtggggtgatggcctaccaaggcgacgacgggtagccggcctgagagggcgaccggccacactgggactgagacacggcccagactcctacgggaggcagcagtggggaatattgcacaatgggggaaaccctgatgcagcgacgccgcgtgggggatgacggccttcgggttgtaaacctctttcagtagggaagaagccttcgggtgacggtacctgcagaagaagtaccggctaactacgtgccagcagccgcggtaatacgtagggtacaagcgtt…	72h
Cellulomonas	FM066_401	caggganatcttaatcggaaacgggggctaataccggatatgaagcgtgcctgcatgggtgtgcctggaaagatttatcggacagggatggactcgcggcctatcagcttgttggtgaggtagtggctcaccaaggcgacgacgggtagccggcctgagagggcgaccggccacactgggactgagacacggcccagactcctacgggaggcagcagtggggaatattgcacaatgggcgcaagcctgatgcagcgacgccgcgtgagggatgaaggccttcgggttgtaaacctctttcagcagggaagaagcgcaagtgacggtacctgcagaagaagcgccggctaactacgtgccagcagccgcggtaatacgtagggcgcaagcgttgtccgga…	72h
Corynebacterium sp.	AM066_013	CAAGAGTCCCCACCATCACGTGCTGGCAACATAAGACAAGGGTTGCGCTCGTTGCGGGACTTAACCCAACATCTCACGACACGAGCTGACGACAACCATGCACCACCTGTACACCAACCACAAGGGAAAACGCATCTCTGCGCCGATCTGGTGTATGTCAAGCCCAGGTAAGGTTCTTCGCGTTGCATCGAATTAATCCACATGCTCCGCCGCTTGTGCGGGCCCCCGTCAATTCCTTTGAGTTTTAGCCTTGCGGCCGTACTCCCCAGGCGGGGCGCTTAATGCGTTAGCTACGGCACGAACCCCGTGG	72h
Dietzia	AF054_025	ctgcacttcgggataagcctgggaaactgggtctaataccggatattcagctttcaccgcatggtggtggttggaaagtttttcggtgcaggatgagcccgcggcctatcagcttgttggtggggtaatggcctaccaaggcgacgacgggtagccggcctgagagggtgatcggccacactgggactgagacacggcccagactcctacgggaggcagcagtggggaatattgcacaatgggcgaaagcctgatgcagcgacgccgcgtgggggatgacggtcttcggattgtaaacccctttcagtagggacgaagcgcaagtgacggtacctgcagaagaagcaccggccaactacgtgccagcagccgcggtaatacgtagggtgcgagcgttgt…	72h
Mycetocola	FM057_015	cttgactctgggataagcgctggaaacggcgtctaataccggatatgacaaccgacggcatcgtctggttgtggaaagaattttggtcaaggatggactcgcggcctatcagcttgttggtgaggtaatggctcaccaaggcgacgacgggtagccggcctgagagggtgaccggccacactgggactgagacacggcccagactcctacgggaggcagcagtggggaatattgcacaatgggcgaaagcctgatgcagcaacgccgcgtgagggacgacggccttcgggttgtaaacctcttttagcagggaagaagcgaaagtgacggtacctgcagaaaaagcaccggctaactacgtgccagcagccgcggtaatacgtagggtgcaagcgttgt…	72h
Kocuria	AM056_014	cttgactctgggataagcctgggaaactgggtctaatactggatacgacatgtcaccgcatggtggcgtgtggaaagggttttactggttttggatgggctcacggcctatcagcttgttggtggggtaatggctcaccaaggcgacgacgggtagccggcctgagagggtgaccggccacactgggactgagacacggcccagactcctacgggaggcagcagtggggaatattgcacaatgggcgaaagcctgatgcagcgacgccgcgtgagggatgacggccttcgggttgtaaacctctttcagcacggaagaagcgaaagtgacggtacgtgcagaagaagcgccggctaactacgtgccagcagccgcggtaatacgtagggcgcaagcgtt…	72h
Microbacterium	FM062_007	cctgactctgggataagcgctggaaacggcgtctaataccggatatgagctgcgaaggcatcttcagcagttggaaagatttttcggtctgggatgggctcacggcctatcagcttgttggtgaggtaatggctcaccaaggcgtcgacgggtagccggcctgagagggtgaccggccacactgggactgagacacggcccagactcctacgggaggcagcagtggggaatattgcacaatgggcggaagcctgatgcagcaacgccgcgtgagggatgacggccttcgggttgtaaacctcttttagcagggaagaagcgaaagtgacggtacctgcagaaaaagcgccggctaactacgtgccagcagccgcggtaatacgtagggcgcaagcgtta…	72h
Micrococcus	AF056_005	cttaactctgggataagcctgggaaactgggtctaataccggataggagcgtccaccgcatggtgggtgttggaaagatttatcggttttggatggactcgcggcctatcagcttgttggtgaggtaatggctcaccaaggcgacgacgggtagccggcctgagagggtgaccggccacactgggactgagacacggcccagactcctacgggaggcagcagtggggaatattgcacaatgggcgaaagcctgatgcagcgacgccgcgtgagggatgacggccttcgggttgtaaacctctttcagtagggaagaagcgaaagtgacggtacctgcagaagaagcaccggctaactacgtgccagcagccgcggtaatacgtagggtgcgagcgttat…	72h
Micrococcus	AM054_017	cttaactctgggataagcctgggaaactgggtctaataccggataggagcgtccaccgcatggtgggtgttggaaagatttatcggttttggatggactcgcggcctatcagcttgttggtgaggtaatggctcaccaaggcgacgacgggtagccggcctgagagggtgaccggccacactgggactgagacacggcccagactcctacgggaggcagcagtggggaatattgcacaatgggcgcaagcctgatgcagcgacgccgcgtgagggatgacggccttcgggttgtaaacctctttcagtagggaagaagcgaaagtgacggtacctgcagaagaagcaccggctaactacgtgccagcagccgcggtaatacgtagggtgcgagcgttat…	72h
Micrococcus	FM061_005	cttaactctgggataagcctgggaaactgggtctaataccggataggagcgtccaccgcatggtgggtgttggaaagatttatcggttttggatggactcgcggcctatcagcttgttggtgaggtaatggctcaccaaggcgacgacgggtagccggcctgagagggtgaccggccacactgggactgagacacggcccagactcctacgggaggcagcagtggggaatattgcacaatgggcgaaagcctgatgcagcgacgccgcgtgagggatgacggccttcgggttgtaaacctctttcagtagggaagaagcgaaagtgacggtacctgcagaagaagcaccggctaactacgtgccagcagccgcggtaatacgtagggtgcgagcgttat…	72h
Moraxella	FM065_009	tagtagtgggggatagctcggggaaactcgaattaataccgcatacgacctacgggtgaaagggggcgcaagctcttgctattagatgagcctaaatcagattagctagttggtggggtaaaggcctaccaaggcgacgatctgtaactggtctgagaggatgatcagtcacaccggaactgagacacggtccggactcctacgggaggcagcagtggggaatattggacaatgggggcaaccctgatccagccatgccgcgtgtgtgaagaaggccttttggttgtaaagcactttaagcagggaggagaggctaatggttaatacccattagattagacgttacctgcagaataagcaccggctaactctgtgccagcagccgcggtaatacagagg…	72h
Mycetocola	FM057_008	cttgactctgggataagcgctggaaacggcgtctaataccggatatgacaaccgacggcatcgtctggttgtggaaagaattttggtcaaggatggactcgcggcctatcagcttgttggtgaggtaatggctcaccaaggcgacgacgggtagccggcctgagagggtgaccggccacactgggactgagacacggcccagactcctacgggaggcagcagtggggaatattgcacaatgggcgaaagcctgatgcagcaacgccgcgtgagggacgacggccttcgggttgtaaacctcttttagcagggaagaagcgaaagtgacggtacctgcagaaaaagcaccggctaactacgtgccagcagccgcggtaatacgtagggtgcaagcgttgt…	72h
Paenibacillus	FM060_005	cacaagacagggataactaccggaaacggtagctaatacccgatacatccttttcctgcatgggagaaggaggaaaggcggagcaatctgtcacttgtggatgggcctgcggcgcattagctagttggtggggtaaaggcctaccaaggcgacgatgcgtagccgacctgagagggtgatcggccacactgggactgagacacggcccagactcctacgggaggcagcagtagggaatcttccgcaatgggcgaaagcctgacggagcaacgccgcgtgagtgatgaaggttttcggatcgtaaagctctgttgccagggaagaacgtctngnagagtaactgctactanagtgacggtacctgagaagaaagccccggctaactacgtgccagcagcc…	72h
Roseomonas	AF061_002	ctgaggtgggggacaaccccgggaaactggggctaataccgcatatgggctgaggcccaaagccgagaggcgcctttggagcggcctgcgtccgattaggtagttggtggggtaaaggcctaccaagcctgcgatcggtagctggtctgagaggacgaccagccacactgggactgagacacggcccagactcctacgggaggcagcagtggggaatattggacaatgggcgaaagcctgatccagcaatgccgcgtgggtgaagaaggtcttcggatcgtaaagccctttcgacggggacgatgatgacggtacccgtagaagaagccccggctaacttcgtgccagcagccgcggtaatacgaagggggctagcgttgctcggaattactgggcgta…	72h
Roseomonas	FM065_010	ctgaggtgggggacaaccccgggaaactggggctaataccgcatatgggctgaggcccaaagccgagaggcgcctttggagcggcctgcgtccgattaggtagttggtggggtaaaggcctaccaagcctgcgatcggtagctggtctgagaggacgaccagccacactgggactgagacacggcccagactcctacgggaggcagcagtggggaatattggacaatgggcgaaagcctgatccagcaatgccgcgtgggtgaagaaggtcttcggatcgtaaagccctttcgacggggacgatgatgacggtacccgtagaagaagccccggctaacttcgtgccagcagccgcggtaatacgaagggggctagcgttgctcggaattactgggcgta…	72h
Sphingomonas	FM070_701	gtatggttcggacttgagttggaaacgactgctaataccggatgatgacgttaagtccaaagatttatcgccagaggatgagcccgcgtgagattaggtagttggtggggtaaaggcctaccaagccgacgatctctagctggtctgagaggatgatcagccacactgggactgagacacggcccagactcctacgggaggcagcagtggggaatattggacaatgggcgcaagcctgatccagcaatgccgcgtgagtgatgaaggccttagggttgtaaagctcttttacccgggatgataatgacagtaccgggagaataagccccggctaactccgtgccagcagccgcggtaatacggagggggctagcgttgttcggaattactgggcgtaaa…	72h
Brevibacillus reuszeri	AF070_009	tctcagactgggataacatagggaaacttatgctaataccggataggtttttggaccgcatggtccgaaaagaaaagatggcttcggctatcactgggagatgggcctgcggcgcattagctagttggtggggtaacggcctaccaaggcgacgatgcgtagccgacctgagagggtgaccggccacactgggactgagacacggcccagactcctacgggaggcagcagtagggaattttccacaatggacgaaagtctgatggagcaacgccgcgtgaacgatgaaggtcttcggattgtaaagttctgttgttagggacgaataagtaccgttcgaatagggcggtaccttgacggtacctgacgagaaagccacggctaactacgtgccagcagc…	72h
Micrococcus luteus	FM070_401	cttaactctgggataagcctgggaaactgggtctaataccggataggagcgtccaccgcatggtgggtgttggaaagatttatcggttttggatggactcgcggcctatcagcttgttggtgaggtaatggctcaccaaggcgacgacgggtagccggcctgagagggtgaccggccacactgggactgagacacggcccagactcattcgggaggcagcagtggggaatattgcacaatgggcgcaagcctgatgcagcgacgccgcgtgagggatgacggccttcgggttgtaaacctctttcagtagggaagaagcgaaagtgacggtacctgcagaagaagcaccggctaactacgtgccagcagccgcggtaatacgtagggtgcgagcgttat…	72h
f__Caulobacteraceae;	FM066_009	GGAAGGGCCACNTNTAGGTGGGTAGGACTTAGNNNNCAGGGCCGGGAACTAATTCGCCGCGGCATGCTGATCCGCGATTACTAGCGATTCCTACTTCATGCCCTCGAGTTGCAGAGGACAATCCGAACTGAGACGACTTTTAAGGATTAACCCTCTGTAGTCGCCATTGTAGCACGTGTGTAGCCCACCCTGTAAGGGCCATGAGGACTTGACGTCATCCCCACCTTCCTCCGGCTTAGCACCGGCAGTCCCATTAGAGTTCCCAACTAAATGATGGCAACTAATGGCGAGGGTTGCGCTCGTTGCGGGACTTAACCCAACATCTCACGACACGAGCTGACGACAGCCATGCAGCACCTGTGTCCTAGTCCCCGAAGGGAAAGCCAGATCTCTCTGGCG…	72h
Dermacoccus	AF068_008	cctcactctgggataagcctgggaaactgggtctaatactggatacgaccgatctccgcatggagtgttggtggaaagtttttgtggtgggggatggactcgcggcctatcagcttgttggtggggtaatggcctaccaaggcgacgacgggtagccggcctgagagggcgaccggccacactgggactgagacacggcccagactcctacgggaggcagcagtggggaatattgcacaatgggcgaaagcctgatgcagcgacgccgcgtgagggatgacggccttcgggttgtaaacctctttcaccagggacgaagctaacgtgacggtacctggagaagaagcaccggctaactacgtgccagcagccgcggtaatacgtagggtgcgagcgttg…	72h
Rhodococcus	FM066_001	ctaacaaggtagaccttaatcatgtagccgtagatcttaacaaggtanacgttgctcgtagcgtggtggaaagatttatcggtgcaggatgggcccgcggcctatcagcttgttggtggggtaatggcctaccaaggcgacgacgggtagccggcctgagagggcgaccggccacactgggactgagacacggcccagactcctacgggaggcagcagtggggaatattgcacaatgggcgcaagcctgatgcagcgacgccgcgtgagggatgacggccttcgggttgtaaacctctttcagcagggacgaagcgcaagtgacggtacctgcagaagaagcaccggccaactacgtgccagcagccgcggtaatacgtagggtgcaagcgttgtccgg…	72h
Corynebacterium	FM063_115	CCTGGGAAACTGGGTCTAATACCGGATAGGACCACGTTTTGGATGGCGTGGTGGAAAGTTTTTCGGTGTGGGATGAGCTCGCGGCCTATCAGCTTGTTGGTGGGGTAATGGCCTACCAAGGCGTCGACGGGTAGCCGGCCTGAGAGGGTGTACGGCCACATTGGGACTGAGATACGGCCCAGACTCCTACGGGAGGCAGCAGTGGGGAATATTGCACAATGGGCGCAAGCCTGATGCAGCGACGCCGCGTGGGGGATGACGGCCTTCGGGTTGTAAACTCCTTTCGCTAGGGACG	72h
Roseomonas	FM070_011	ctgaggtgggggacaaccccgggaaactggggctaataccgcatatgggctgaggcccaaagccgagaggcgcctttggagcggcctgcgtccgattaggtagttggtggggtaaaggcctaccaagcctgcgatcggtagctggtctgagaggacgaccagccacactgggactgagacacggcccagactcctacgggaggcagcagtggggaatattggacaatgggcgaaagcctgatccagcaatgccgcgtgggtgaagaaggtcttcggatcgtaaagccctttcgacggggacgatgatgacggtacccgtagaagaagccccggctaacttcgtgccagcagccgcggtaatacgaagggggctagcgttgctcggaattactgggcgta…	72h
Dietzia	FM054_012	ctgcacttcgggataagcctgggaaactgggtctaataccggatattcagttcctgccgcatggtgggggttggaaagtttttcggtgcaggatgagcccgcggcctatcagcttgttggtggggtaatggcctaccaaggcgacgacgggtagccggcctgagagggtgatcggccacactgggactgagacacggcccagactcctacgggaggcagcagtggggaatattgcacaatgggcgaaagcctgatgcagcgacgccgcgtgggggatgacggtcttcggattgtaaacccctttcagtagggacgaagcgcaagtgacggtacctgcagaagaagcaccggccaactacgtgccagcagccgcggtaatacgtagggtgcgagcgttgt…	72h
f__Dermabacteraceae	AM054_011	cccctcttcgggataacctcgggaaatcggggctaataccggatatgacttcgcaccgcatggtgtgttgtggaaagtttttcggtgggggatggactcgcggcctatcagtttgttggtgaggtaatggctcaccaaggcgatgacgggtagccggcctgagagggcgaccggccacactgggactgagacacggcccagactcctacgggaggcagcagtggggaatattgcacaatgggcgaaagcctgatgcagcgacgccgcgtgggggatgacggccttcgggttgtaaacctctttcagtagggaagaagcgaaagtgacggtacctgcagaagaagcgccggctaactacgtgccagcagccgcggtaatacgtagggcgcaagcgttgtc…	72h
Micrococcus	AF054_004	cttaactctgggataagcctgggaaactgggtctaataccggataggagcgtccaccgcatggtgggtgttggaaagatttatcggttttggatggactcgcggcctatcagcttgttggtgaggtaatggctcaccaaggcgacgacgggtagccggcctgagagggtgaccggccacactgggactgagacacggcccagactcctacgggaggcagcagtggggaatattgcacaatgggcgcaagcctgatgcagcgacgccgcgtgagggatgacggccttcgggttgtaaacctctttcagtagggaagaagcgaaagtgacggtacctgcagaagaagcaccggctaactacgtgccagcagccgcggtaatacgtagggtgcgagcgttat…	72h
Propionibacterium	FM066_203	ctgacaaggtagatcttaaccaggtagccgtaaatcttaacaaggtatcctttaatcntggcggggtttggaaagcttcggcggttttggatggactcgcggcttatcagcttgttggtggggtagtggcttaccaaggctttgacgggtagccggcctgagagggcgaccggccacattgggactgagatacggcccagactcctacgggaggcagcagtggggaatattgcacaatgggcggaagcctgatgcagcaacgccgcgtgcgggatgacggccttcgggttgtaaaccgctttcagcaggggcgaagcttgtggtgacggtacctgcagaagaagcaccggctaactacgtgccagcagccgcggtgatacgtagggtgcgagcgttgtc…	72h
Enhydrobacter	AM057_005	tagtagtgggggatagctcggggaaactcgaattaataccgcatacgacctacgggtgaaagggggcgcaagctcttgctattagatgagcctaaatcagattagctagttggtggggtaaaggcccaccaaggcgacgatctgtaactggtctgagaggatgatcagtcacaccggaactgagacacggtccggactcctacgggaggcagcagtggggaatattggacaatgggggcaaccctgatccagccatgccgcgtgtgtgaagaaggccttttggttgtaaagcactttaagcagggaggagaggctaatggttaatacccattagattagacgttacctgcagaataagcaccggctaactctgtgccagcagccgcggtaatacagagg…	72h
f__Micrococcaceae	FM057_005	tttaactctgggataagccttggaaacgaggtctaataccggatacgactagttcccgcatgggatgctggtggaaagggatatgtactggttttagatgggctcacggcctatcagcttgttggtgaggtaacggctcaccaaggcgacgacgggtagccggcctgagagggtgaccggccacactgggactgagacacggcccagactcctacgggaggcagcagtggggaatattgcacaatgggcgcaagcctgatgcagcgacgccgcgtgagggatgacggccttcgggttgtaaacctctttcagcagggaagaagcgaaagtgacggtacctgcagaagaagcgccggctaactacgtgccagcagccgcggtaatacgtagggcgcgagc…	72h
Paracoccus aminovorans	AM058_014	cttctctacggaatagccctgggaaactgggagtaataccgtatacgccctattggggaaagatttatcggagaaggatcagcccgcgttggattaggtagttggtggggtaatggcctaccaagccgacgatccatagctggtttgagaggatgatcagccacactgggactgagacacggcccagactcctacgggaggcagcagtggggaatcttagacaatgggggcaaccctgatctagccatgccgcgtgagtgatgaaggccttagggttgtaaagctctttcagctgggaagataatgacggtaccagcagaagaagccccggctaactccgtgccagcagccgcggtaatacggagggggctagcgttgttcggaattactgggcgtaaa…	72h
Sporosarcina	AM054_018	ctgcagatggggataactccgggaaaccggggctaataccgaataatcggttcttccgcatggaagaactctgaaagacggtttcggctgtcactgcaggatgggcccgcggcgcattagctagttggtggggtaacggcctaccaaggcgacgatgcgtagccgacctgagagggtgatcggccacactgggactgagacacggcccagactcctacgggaggcagcagtagggaatcttccacaatggacgaaagtctgatggagcaacgccgcgtgagcgaagaaggttttcggatcgtaaagctctgttgcgagggaagaacaagtacgggagtaactgcccgtaccttgacggtacctcgttagaaagccacggctaactacgtgccagcagcc…	72h
Kocuria palustris	AF060_010	cttgactctgggataagcccgggaaactgggtctaatactggatgctacatgtcaccgcatggtggtgtgtggaaagggtttactggtcttggatgggctcacggcctatcagcttgttggtgaggtaatggctcaccaaggcgacgacgggtagccggcctgagagggtgaccggccacactgggactgagacacggcccagactcctacgggaggcagcagtggggaatattgcacaatgggcgaaagcctgatgcagcgacgccgcgtgagggatgacggccttcgggttgtaaacctctttcagcagggaagaagccacaagtgacggtacctgcagaagaagcgccggctaactacgtgccagcagccgcggtaatacgtagggcgcaagcgtt…	72h
Kocuria	AF066_401	aaggtagatcttaacccggtaaacttagatcttaacagggtgcaacttgtccccgcatgggggtgtgtggaaagggttttactggtcttggatgggctcacggcctatcagcttgttggtgaggtaatggctcaccaaggcgacgacgggtagccggcctgagagggtgaccggccacactgggactgagacacggcccagactcctacgggaggcagcagtggggaatattgcacaatgggcggaagcctgatgcagcgacgccgcgtgagggatgacggccttcgggttgtaaacctctttcagcagggaagaagccacaagtgacggtacctgcagaagaagcgccggctaactacgtgccagcagccgcggtaatacgtagggcgcaagcgttgt…	72h
Bacillus firmus	AM065_006	tgtaagactgggataactccgggaaaccggggctaataccggataattctttccctcacatgagggaaagctgaaagatggtttcggctatcacttacagatgggcccgcggcgcattagctagttggtgaggtaacggctcaccaaggcaacgatgcgtagccgacctgagagggtgatcggccacactgggactgagacacggcccagactcctacgggaggcagcagtagggaatcttccgcaatggacgaaagtctgacggagcaacgccgcgtgagtgatgaaggttttcggatcgtaaaactctgttgttagggaagaacaagtaccggagtaactgccggtaccttgacggtacctaaccagaaagccacggctaactacgtgccagcagcc…	72h
Bacillus selenatarsenatis	AM069_007	tgtaagactgggataacttcgggaaaccggagctaataccggataatcctttccctctcatgagggaaagctgaaagacggtttcggctgtcacttacagatgggcccgcggcgcattagctagttggtgaggtaacggctcaccaaggcgacgatgcgtagccgacctgagagggtgatcggccacactgggactgagacacggcccagactcctacgggaggcagcagtagggaatcttccgcaatggacgaaagtctgacggagcaacgccgcgtgagcgatgaaggccttcgggtcgtaaagctctgttgtcagggaagaacaagtaccggagtaactgccggtaccttgacggtacctgaccagaaagccacggctaactacgtgccagcagcc…	72h
Paracoccus	AM055_003	ctttgctgctcaatantcccgggaaactgggggtaataccgcatacgccctttgggggaaagatttatcggcgaaggatcggcccgcgttggattaggtagttggtggggtaatggcccaccaagccgacgatccatagctggtttgagaggatgatcagccacactgggactgagacacggcccagactcctacgggaggcagcagtggggaatcttagacaatgggggcaaccctgatctagccatgccgcgtgagtgatgaaggccttagggttgtaaagctctttcagctgggaagataatgacggtaccagcagaagaagccccggctaactccgtgccagcagccgcggtaatacggagggggctagcgttgttcggaattactgggcgtaaa…	72h

## Sheet: ST3_16S_classification
isolate name	Trimmed sequence	lca_tax_embl	lca_tax_greengenes	lca_tax_ltp	lca_tax_rdp	lca_tax_slv													ct
AF054_001	cataagactgggataactccgggaaaccggggctaataccggataacattttgaactgcatggttcgaaattgaaaggcggcttcggctgtcacttatggatggacccgcgtcgcattagctagttggtgaggtaacggctcaccaaggcaacgatgcgtagccgacctgagagggtgatcggccacactgggactgagacacggcccagactcctacgggaggcagcagtagggaatcttccgcaatggacgaaagtctgacggagcaacgccgcgtgagtgatgaaggctttcgggtcgtaaaactctgttgttagggaagaacaagtgctagttgaataagctggcaccttgacggtacctaaccagaaagccacggctaactacgtgccagcagc…	Bacteria;	k__Bacteria;p__Firmicutes;c__Bacilli;o__Bacillales;f__Bacillaceae;	Unclassified;	Bacteria;Firmicutes;Bacilli;Bacillales;Bacillaceae 1;Bacillus;	Bacteria;Firmicutes;Bacilli;Bacillales;Bacillaceae;Bacillus;						Bacteria;Firmicutes;Bacilli;Bacillales;Staphylococcaceae;Staphylococcus;	Bacteria	Firmicutes	Bacilli	Bacillales	Staphylococcaceae	Staphylococcus	398
AF054_002	cataagactgggataactccgggaaaccggggctaataccggataatattttgaactgcatggttcgaaattgaaaggcggcttcggctgtcacttatggatggacccgcgtcgcattagctagttggtgaggtaacggctcaccaaggcaacgatgcgtagccgacctgagagggtgatcggccacactgggactgagacacggcccagactcctacgggaggcagcagtagggaatcttccgcaatggacgaaagtctgacggagcaacgccgcgtgagtgatgaaggctttcgggtcgtaaaactctgttgttagggaagaacaagtgctagttgaataagctggcaccttgacggtacctaaccagaaagccacggctaactacgtgccagcagc…	Bacteria;Firmicutes;Bacilli;Bacillales;Bacillaceae;Bacillus;	k__Bacteria;p__Firmicutes;c__Bacilli;o__Bacillales;f__Bacillaceae;	Unclassified;	Bacteria;Firmicutes;Bacilli;Bacillales;Bacillaceae 1;Bacillus;	Bacteria;Firmicutes;Bacilli;Bacillales;Bacillaceae;Bacillus;						Bacteria;Actinobacteria;Actinobacteria;Micrococcales;Micrococcaceae;Micrococcus;	Bacteria	Actinobacteria	Actinobacteria	Micrococcales	Micrococcaceae	Micrococcus	111
AF054_003	tgtaagactgggataactccgggaaaccggagctaataccggatagttccttgaaccgcatggttcaaggatgaaagacggtttcggctgtcacttacagatggacccgcggcgcattagctagttggtggggtaatggctcaccaaggcgacgatgcgtagccgacctgagagggtgatcggccacactgggactgagacacggcccagactcctacgggaggcagcagtagggaatcttccgcaatggacgaaagtctgacggagcaacgccgcgtgagtgatgaaggttttcggatcgtaaagctctgttgttagggaagaacaagtgcgagagtaactgctcgcaccttgacggtacctaaccagaaagccacggctaactacgtgccagcagcc…	Bacteria;Firmicutes;Bacilli;Bacillales;Bacillaceae;Bacillus;	k__Bacteria;p__Firmicutes;c__Bacilli;o__Bacillales;f__Bacillaceae;g__Bacillus;	Unclassified;	Bacteria;Firmicutes;Bacilli;Bacillales;Bacillaceae 1;Bacillus;	Bacteria;Firmicutes;Bacilli;Bacillales;Bacillaceae;Bacillus;						Bacteria;Firmicutes;Bacilli;Bacillales;Bacillaceae;Bacillus;	Bacteria	Firmicutes	Bacilli	Bacillales	Bacillaceae	Bacillus	40
AF054_004	cttaactctgggataagcctgggaaactgggtctaataccggataggagcgtccaccgcatggtgggtgttggaaagatttatcggttttggatggactcgcggcctatcagcttgttggtgaggtaatggctcaccaaggcgacgacgggtagccggcctgagagggtgaccggccacactgggactgagacacggcccagactcctacgggaggcagcagtggggaatattgcacaatgggcgcaagcctgatgcagcgacgccgcgtgagggatgacggccttcgggttgtaaacctctttcagtagggaagaagcgaaagtgacggtacctgcagaagaagcaccggctaactacgtgccagcagccgcggtaatacgtagggtgcgagcgttat…	Bacteria;Actinobacteria;Micrococcales;Micrococcaceae;Micrococcus;	k__Bacteria;p__Actinobacteria;c__Actinobacteria;o__Actinomycetales;f__Micrococcaceae;g__Micrococcus;s__luteus;	Unclassified;	Bacteria;"Actinobacteria";Actinobacteria;Actinobacteridae;Actinomycetales;Micrococcineae;Micrococcaceae;Micrococcus;	Bacteria;Actinobacteria;Actinobacteria;Micrococcales;Micrococcaceae;Micrococcus;						Bacteria;Actinobacteria;Actinobacteria;Propionibacteriales;Propionibacteriaceae;Cutibacterium;	Bacteria	Actinobacteria	Actinobacteria	Propionibacteriales	Propionibacteriaceae	Cutibacterium	33
AF054_005	ctgtagattgggataactccgggaaaccggggctaataccgaataatccatttcctcacatgtggagatgttaaaagacggtttcgcgctgtccctacnggaggggcccgcggcgcattacctagttggggaggtaacggctcaccaaggcaacaatgcgtacccaacctgaaagggggatcggccacccggggactgaaacccggcccaaactcctacgggaggcaccattagggaatcttccacaagggacaaaagtctgatggaccaccgccccgggagtgaaaaaggttttcggatcgtaaaactctgttgtgaggaaaaaanaattacaaaagtacctgctcgtaccttgacggtacctcattaaaaagccacggctaactacgtgccagcagc…	Bacteria;	k__Bacteria;p__Firmicutes;c__Bacilli;o__Bacillales;f__Planococcaceae;	Unclassified;	Bacteria;Firmicutes;Bacilli;Bacillales;Planococcaceae;Planococcaceae_incertae_sedis;	Bacteria;Firmicutes;Bacilli;Bacillales;Planococcaceae;						Bacteria;Actinobacteria;Actinobacteria;Micrococcales;Micrococcaceae;Kocuria;	Bacteria	Actinobacteria	Actinobacteria	Micrococcales	Micrococcaceae	Kocuria	13
AF054_007	cttaactcggggataagcctgggaaactgggtctaataccggataggagcgtccaccgcatggtgggtgttggaaagatttatcggttttggatggactcgcggcctatcagcttgttggtgaggtaatggctcaccaaggcgacgacgggtagccggcctgagagggtgaccggccacactgggactgagacacggcccagactcctacgggaggcagcagtggggaatattgcacaatgggcgcaagcctgatgcagcgacgccgcgtgagggatgacggccttcgggttgtaaacctctttcagtagggaagaagcgaaagtgacggtacctgcagaagaagcaccggctaactacgtgccagcagccgcggtaatacgtagggtgcgagcgttat…	Bacteria;Actinobacteria;Micrococcales;Micrococcaceae;Micrococcus;	k__Bacteria;p__Actinobacteria;c__Actinobacteria;o__Actinomycetales;f__Micrococcaceae;g__Micrococcus;s__luteus;	Unclassified;	Bacteria;"Actinobacteria";Actinobacteria;Actinobacteridae;Actinomycetales;Micrococcineae;Micrococcaceae;Micrococcus;	Bacteria;Actinobacteria;Actinobacteria;Micrococcales;Micrococcaceae;Micrococcus;						Bacteria;Proteobacteria;Alphaproteobacteria;Acetobacterales;Acetobacteraceae;Roseomonas;	Bacteria	Proteobacteria	Alphaproteobacteria	Acetobacterales	Acetobacteraceae	Roseomonas	13
AF054_008	cttacatgggagattttantggggaactgggtctaataccggataggagcgtccaccgcatggtgggtgttggaaagatttatcggttttggatggactcgcggcctatcagcttgttggtgaggtaatggctcaccaaggcgacgacgggtagccggcctgagagggtgaccggccacactgggactgagacacggcccagactcctacgggaggcagcagtggggaatattgcacaatgggcgcaagcctgatgcagcgacgccgcgtgagggatgacggccttcgggttgtaaacctctttcagtagggaagaagcgaaagtgacggtacctgcagaagaagcaccggctaactacgtgccagcagccgcggtaatacgtagggtgcgagcgttat…	Bacteria;Actinobacteria;Micrococcales;Micrococcaceae;Micrococcus;	k__Bacteria;p__Actinobacteria;c__Actinobacteria;o__Actinomycetales;f__Micrococcaceae;g__Micrococcus;s__luteus;	Unclassified;	Bacteria;"Actinobacteria";Actinobacteria;Actinobacteridae;Actinomycetales;Micrococcineae;Micrococcaceae;Micrococcus;	Bacteria;Actinobacteria;Actinobacteria;Micrococcales;Micrococcaceae;Micrococcus;						Bacteria;Firmicutes;Bacilli;Bacillales;Paenibacillaceae;Paenibacillus;	Bacteria	Firmicutes	Bacilli	Bacillales	Paenibacillaceae	Paenibacillus	13
AF054_009	cttaactctgggataagcctgggaaactgggtctaataccggataggagcgtccaccgcatggtgggtgttggaaagatttatcggttttggatggactcgcggcctatcagcttgttggtgaggtaatggctcaccaaggcgacgacgggtagccggcctgagagggtgaccggccacactgggactgagacacggcccagactcctacgggaggcagcagtggggaatattgcacaatgggcgcaagcctgatgcagcgacgccgcgtgagggatgacggccttcgggttgtaaacctctttcagtagggaagaagcgaaagtgacggtacctgcagaagaagcaccggctaactacgtgccagcagccgcggtaatacgtagggtgcgagcgttat…	Bacteria;Actinobacteria;Micrococcales;Micrococcaceae;Micrococcus;	k__Bacteria;p__Actinobacteria;c__Actinobacteria;o__Actinomycetales;f__Micrococcaceae;g__Micrococcus;s__luteus;	Unclassified;	Bacteria;"Actinobacteria";Actinobacteria;Actinobacteridae;Actinomycetales;Micrococcineae;Micrococcaceae;Micrococcus;	Bacteria;Actinobacteria;Actinobacteria;Micrococcales;Micrococcaceae;Micrococcus;						Bacteria;Proteobacteria;Gammaproteobacteria;Pseudomonadales;Moraxellaceae;Acinetobacter;	Bacteria	Proteobacteria	Gammaproteobacteria	Pseudomonadales	Moraxellaceae	Acinetobacter	7
AF054_010	cttaactctgggataagcctgggaaactgggtctaataccggataggagcgtccaccgcatggtgggtgttggaaagatttatcggttttggatggactcgcggcctatcagcttgttggtgaggtaatggctcaccaaggcgacgacgggtagccggcctgagagggtgaccggccacactgggactgagacacggcccagactcctacgggaggcagcagtggggaatattgcacaatgggcgaaagcctgatgcagcgacgccgcgtgagggatgacggccttcgggttgtaaacctctttcagtagggaagaagcgaaagtgacggtacctgcagaagaagcaccggctaactacgtgccagcagccgcggtaatacgtagggtgcgagcgttat…	Bacteria;Actinobacteria;Micrococcales;Micrococcaceae;	k__Bacteria;p__Actinobacteria;c__Actinobacteria;o__Actinomycetales;f__Micrococcaceae;g__Micrococcus;s__luteus;	Bacteria;Actinobacteria;Actinobacteria;Micrococcales;Micrococcaceae;Micrococcus;	Bacteria;"Actinobacteria";Actinobacteria;Actinobacteridae;Actinomycetales;Micrococcineae;Micrococcaceae;Micrococcus;	Bacteria;Actinobacteria;Actinobacteria;Micrococcales;Micrococcaceae;Micrococcus;						Bacteria;Actinobacteria;Actinobacteria;Corynebacteriales;Dietziaceae;Dietzia;	Bacteria	Actinobacteria	Actinobacteria	Corynebacteriales	Dietziaceae	Dietzia	6
AF054_012	cttgactctgggataagcctgggaaactgggtctaatactggatatgacttctcaccgcatggtggggggtggaaagatttattggtcttggatggactcgcggcctatcagcttgttggtgaggtaatggctcaccaaggcgacgacgggtagccggcctgagagggtgaccggccacactgggactgagacacggcccagactcctacgggaggcagcagtggggaatattgcacaatgggcgcaagcctgatgcagcgacgccgcgtgagggatgacggccttcgggttgtaaacctctttcagtagggaagaagcgaaagtgacggtacctgcagaagaagcgccggctaactacgtgccagcagccgcggtaatacgtagggcgcgagcgttat…	Bacteria;Actinobacteria;Micrococcales;Micrococcaceae;	k__Bacteria;p__Actinobacteria;c__Actinobacteria;o__Actinomycetales;f__Micrococcaceae;	Bacteria;Actinobacteria;Actinobacteria;Micrococcales;Micrococcaceae;Micrococcus;	Bacteria;"Actinobacteria";Actinobacteria;Actinobacteridae;Actinomycetales;Micrococcineae;Micrococcaceae;Micrococcus;	Bacteria;Actinobacteria;Actinobacteria;Micrococcales;Micrococcaceae;Micrococcus;						Bacteria;Actinobacteria;Actinobacteria;Micrococcales;Dermacoccaceae;Dermacoccus;	Bacteria	Actinobacteria	Actinobacteria	Micrococcales	Dermacoccaceae	Dermacoccus	6
AF054_014	cttaactctgggataagcctgggaaactgggtctaataccggataggagcgtccaccgcatggtgggtgttggaaagatttatcggttttggatggactcgcggcctatcagcttgttggtgaggtaatggctcaccaaggcgacgacgggtagccggcctgagagggtgaccggccacactgggactgagacacggcccagactcctacgggaggcagcagtggggaatattgcacaatgggcgcaagcctgatgcagcgacgccgcgtgagggatgacggccttcgggttgtaaacctctttcagtagggaagaagcgaaagtgacggtacctgcagaagaagcaccggctaactacgtgccagcagccgcggtaatacgtagggtgcgagcgttat…	Bacteria;Actinobacteria;Micrococcales;Micrococcaceae;Micrococcus;	k__Bacteria;p__Actinobacteria;c__Actinobacteria;o__Actinomycetales;f__Micrococcaceae;g__Micrococcus;s__luteus;	Unclassified;	Bacteria;"Actinobacteria";Actinobacteria;Actinobacteridae;Actinomycetales;Micrococcineae;Micrococcaceae;Micrococcus;	Bacteria;Actinobacteria;Actinobacteria;Micrococcales;Micrococcaceae;Micrococcus;						Bacteria;Proteobacteria;Gammaproteobacteria;Pseudomonadales;Moraxellaceae;Enhydrobacter;	Bacteria	Proteobacteria	Gammaproteobacteria	Pseudomonadales	Moraxellaceae	Enhydrobacter	4
AF054_015	cttgactctgggataagcctgggaaactgggtctaatactggatatgacttctcaccgcatggtggggggtggaaagatttattggtcttggatggactcgcggcctatcagcttgttggtgaggtaatggctcaccaaggcgacgacgggtagccggcctgagagggtgaccggccacactgggactgagacacggcccagactcctacgggaggcagcagtggggaatattgcacaatgggcgcaagcctgatgcagcgacgccgcgtgagggatgacggccttcgggttgtaaacctctttcagtagggaagaagcgaaagtgacggtacctgcagaagaagcgccggctaactacgtgccagcagccgcggtaatacgtagggcgcgagcgttat…	Bacteria;Actinobacteria;Micrococcales;Micrococcaceae;	k__Bacteria;p__Actinobacteria;c__Actinobacteria;o__Actinomycetales;f__Micrococcaceae;	Bacteria;Actinobacteria;Actinobacteria;Micrococcales;Micrococcaceae;Micrococcus;	Bacteria;"Actinobacteria";Actinobacteria;Actinobacteridae;Actinomycetales;Micrococcineae;Micrococcaceae;Micrococcus;	Bacteria;Actinobacteria;Actinobacteria;Micrococcales;Micrococcaceae;Micrococcus;						Bacteria;Proteobacteria;Gammaproteobacteria;Pseudomonadales;Pseudomonadaceae;Pseudomonas;	Bacteria	Proteobacteria	Gammaproteobacteria	Pseudomonadales	Pseudomonadaceae	Pseudomonas	4
AF054_017	cctgactctgggataagcccgggaaactgggtctaataccggatatgaccattctccgcatggagtggtggtggaaagtttttcggttggggatgggctcgcggcctatcagcttgttggtggggtgatggcctaccaaggcgacgacgggtagccggcctgagagggcgaccggccacactgggactgagacacggcccagactcctacgggaggcagcagtggggaatattgcacaatgggggaaaccctgatgcagcgacgccgcgtgggggatgacggccttcgggttgtaaacctctttcagtagggaagaagccttcgggtgacggtacctgcagaagaagtaccggctaactacgtgccagcagccgcggtaatacgtagggtacaagcgtt…	Bacteria;environmental samples;	k__Bacteria;p__Actinobacteria;c__Actinobacteria;o__Actinomycetales;f__Brevibacteriaceae;g__Brevibacterium;	Unclassified;	Bacteria;"Actinobacteria";Actinobacteria;Actinobacteridae;Actinomycetales;Micrococcineae;Brevibacteriaceae;Brevibacterium;	Bacteria;Actinobacteria;Actinobacteria;Micrococcales;Brevibacteriaceae;Brevibacterium;						Bacteria;Proteobacteria;Alphaproteobacteria;Rhodobacterales;Rhodobacteraceae;Paracoccus;	Bacteria	Proteobacteria	Alphaproteobacteria	Rhodobacterales	Rhodobacteraceae	Paracoccus	4
AF054_018	tataagactgggataactccgggaaaccggagctaataccggataatattttgaaccgcatggttcaaaagtgaaagatggttctgctatcacttatagatggacccgcgccgtattagctagttggtaaggtaacggcttaccaaggcgacgatacgtagccgacctgagagggtgatcggccacactggaactgagacacggtccagactcctacgggaggcagcagtagggaatcttccgcaatgggcgaaagcctgacggagcaacgccgcgtgagtgatgaaggtcttcggatcgtaaaactctgttattagggaagaacatacgtgtaagtaactgtgcacgtcttgacggtacctaatcagaaagccacggctaactacgtgccagcagccg…	Bacteria;	k__Bacteria;p__Firmicutes;c__Bacilli;o__Bacillales;f__Staphylococcaceae;g__Staphylococcus;s__haemolyticus;	Bacteria;Firmicutes;Bacilli;Bacillales;Staphylococcaceae;Staphylococcus;	Bacteria;Firmicutes;Bacilli;Bacillales;Staphylococcaceae;Staphylococcus;	Bacteria;Firmicutes;Bacilli;Bacillales;Staphylococcaceae;Staphylococcus;						Bacteria;Actinobacteria;Actinobacteria;Micrococcales;Microbacteriaceae;Microbacterium;	Bacteria	Actinobacteria	Actinobacteria	Micrococcales	Microbacteriaceae	Microbacterium	3
AF054_019	cttgactctgggataagcctgggaaactgggtctaatactggatatgacttctcaccgcatggtggggggtggaaagatttattggtcttggatggactcgcggcctatcagcttgttggtgaggtaatggctcaccaaggcgacgacgggtagccggcctgagagggtgaccggccacactgggactgagacacggcccagactcctacgggaggcagcagtggggaatattgcacaatgggcgcaagcctgatgcagcgacgccgcgtgagggatgacggccttcgggttgtaaacctctttcagtagggaagaagcgaaagtgacggtacctgcagaagaagcgccggctaactacgtgccagcagccgcggtaatacgtagggcgcgagcgttat…	Bacteria;Actinobacteria;Micrococcales;Micrococcaceae;	k__Bacteria;p__Actinobacteria;c__Actinobacteria;o__Actinomycetales;f__Micrococcaceae;	Bacteria;Actinobacteria;Actinobacteria;Micrococcales;Micrococcaceae;Micrococcus;	Bacteria;"Actinobacteria";Actinobacteria;Actinobacteridae;Actinomycetales;Micrococcineae;Micrococcaceae;Micrococcus;	Bacteria;Actinobacteria;Actinobacteria;Micrococcales;Micrococcaceae;Micrococcus;						Bacteria;Firmicutes;Bacilli;Bacillales;Planococcaceae;Sporosarcina;	Bacteria	Firmicutes	Bacilli	Bacillales	Planococcaceae	Sporosarcina	3
AF054_020	cttaactcggggataagcctgggaaactgggtctaataccggataggagcgcctaccgcatggtgggtgttggaaagatttatcggttttggatggactcgcggcctatcagcttgttggtgaggtaatggctcaccaaggcgacgacgggtagccggcctgagagggtgaccggccacactgggactgagacacggcccagactcctacgggaggcagcagtggggaatattgcacaatgggcgaaagcctgatgcagcgacgccgcgtgagggatgacggccttcgggttgtaaacctctttcagtagggaagaagcgaaagtgacggtacctgcagaagaagcaccggctaactacgtgccagcagccgcggtaatacgtagggtgcgagcgttat…	Bacteria;Actinobacteria;Micrococcales;Micrococcaceae;Micrococcus;	k__Bacteria;p__Actinobacteria;c__Actinobacteria;o__Actinomycetales;f__Micrococcaceae;g__Micrococcus;s__luteus;	Unclassified;	Bacteria;"Actinobacteria";Actinobacteria;Actinobacteridae;Actinomycetales;Micrococcineae;Micrococcaceae;Micrococcus;	Bacteria;Actinobacteria;Actinobacteria;Micrococcales;Micrococcaceae;Micrococcus;						Bacteria;Actinobacteria;Actinobacteria;Micrococcales;Dermabacteraceae;Brachybacterium;	Bacteria	Actinobacteria	Actinobacteria	Micrococcales	Dermabacteraceae	Brachybacterium	2
AF054_021	ctgcacttcgggataagcctgggaaactgggtctaataccggatattcagttcctgccgcatggtgggggttggaaagtttttcggtgcaggatgagcccgcggcctatcagcttgttggtggggtaatggcctaccaaggcgacgacgggtagccggcctgagagggtgatcggccacactgggactgagacacggcccagactcctacgggaggcagcagtggggaatattgcacaatgggcgaaagcctgatgcagcgacgccgcgtgggggatgacggtcttcggattgtaaacccctttcagtagggacgaagcgcaagtgacggtacctgcagaagaagcaccggccaactacgtgccagcagccgcggtaatacgtagggtgcgagcgttgt…	Bacteria;	k__Bacteria;p__Actinobacteria;c__Actinobacteria;o__Actinomycetales;f__Dietziaceae;g__Dietzia;	Bacteria;Actinobacteria;Actinobacteria;Actinomycetales;Corynebacterineae;Dietziaceae;Dietzia;	Bacteria;"Actinobacteria";Actinobacteria;Actinobacteridae;Actinomycetales;Corynebacterineae;Dietziaceae;Dietzia;	Bacteria;Actinobacteria;Actinobacteria;Corynebacteriales;Dietziaceae;Dietzia;						Bacteria;Firmicutes;Bacilli;Bacillales;Planococcaceae;Lysinibacillus;	Bacteria	Firmicutes	Bacilli	Bacillales	Planococcaceae	Lysinibacillus	2
AF054_022	cataagactgggataactccgggaaaccggggctaataccggataatattttgaactgcatggttcgaaattgaaaggcggcttcggctgtcacttatggatggacccgcgtcgcattagctagttggtgaggtaacggctcaccaaggcaacgatgcgtagccgacctgagagggtgatcggccacactgggactgagacacggcccagactcctacgggaggcagcagtagggaatcttccgcaatggacgaaagtctgacggagcaacgccgcgtgagtgatgaaggctttcgggtcgtaaaactctgttgttagggaagaacaagtgctagttgaataagctggcaccttgacggtacctaaccagaaagccacggctaactacgtgccagcagc…	Bacteria;Firmicutes;Bacilli;Bacillales;Bacillaceae;Bacillus;	k__Bacteria;p__Firmicutes;c__Bacilli;o__Bacillales;f__Bacillaceae;	Unclassified;	Bacteria;Firmicutes;Bacilli;Bacillales;Bacillaceae 1;Bacillus;	Bacteria;Firmicutes;Bacilli;Bacillales;Bacillaceae;Bacillus;						Bacteria;Firmicutes;Bacilli;Lactobacillales;Aerococcaceae;Aerococcus;	Bacteria	Firmicutes	Bacilli	Lactobacillales	Aerococcaceae	Aerococcus	2
AF054_023	ctgcacttcgggataagcctgggaaactgggtctaataccggatattcagctttcaccgcatggtggtggttggaaagtttttcggtgcaggatgagcccgcggcctatcagcttgttggtggggtaatggcctaccaaggcgacgacgggtagccggcctgagagggtgatcggccacactgggactgagacacggcccagactcctacgggaggcagcagtggggaatattgcacaatgggcgaaagcctgatgcagcgacgccgcgtgggggatgacggtcttcggattgtaaacccctttcagtagggacgaagcgcaagtgacggtacctgcagaagaagcaccggccaactacgtgccagcagccgcggtaatacgtagggtgcgagcgttgt…	Bacteria;	k__Bacteria;p__Actinobacteria;c__Actinobacteria;o__Actinomycetales;f__Dietziaceae;g__Dietzia;	Unclassified;	Bacteria;"Actinobacteria";Actinobacteria;Actinobacteridae;Actinomycetales;Corynebacterineae;Dietziaceae;Dietzia;	Bacteria;Actinobacteria;Actinobacteria;Corynebacteriales;Dietziaceae;Dietzia;						Bacteria;Proteobacteria;Alphaproteobacteria;Caulobacterales;Caulobacteraceae;Brevundimonas;	Bacteria	Proteobacteria	Alphaproteobacteria	Caulobacterales	Caulobacteraceae	Brevundimonas	2
AF054_024	cataagactgggataactccgggaaaccggggctaataccggataatattttgaactgcatggttcgaaattgaaaggcggcttcggctgtcacttatggatggacccgcgtcgcattagctagttggtgaggtaacggctcaccaaggcaacgatgcgtagccgacctgagagggtgatcggccacactgggactgagacacggcccagactcctacgggaggcagcagtagggaatcttccgcaatggacgaaagtctgacggagcaacgccgcgtgagtgatgaaggctttcgggtcgtaaaactctgttgttagggaagaacaagtgctagttgaataagctggcaccttgacggtacctaaccagaaagccacggctaactacgtgccagcagc…	Bacteria;Firmicutes;Bacilli;Bacillales;Bacillaceae;Bacillus;	k__Bacteria;p__Firmicutes;c__Bacilli;o__Bacillales;f__Bacillaceae;	Unclassified;	Bacteria;Firmicutes;Bacilli;Bacillales;Bacillaceae 1;Bacillus;	Bacteria;Firmicutes;Bacilli;Bacillales;Bacillaceae;Bacillus;						Bacteria;Actinobacteria;Actinobacteria;Micrococcales;Microbacteriaceae;Okibacterium;	Bacteria	Actinobacteria	Actinobacteria	Micrococcales	Microbacteriaceae	Okibacterium	2
AF054_025	ctgcacttcgggataagcctgggaaactgggtctaataccggatattcagctttcaccgcatggtggtggttggaaagtttttcggtgcaggatgagcccgcggcctatcagcttgttggtggggtaatggcctaccaaggcgacgacgggtagccggcctgagagggtgatcggccacactgggactgagacacggcccagactcctacgggaggcagcagtggggaatattgcacaatgggcgaaagcctgatgcagcgacgccgcgtgggggatgacggtcttcggattgtaaacccctttcagtagggacgaagcgcaagtgacggtacctgcagaagaagcaccggccaactacgtgccagcagccgcggtaatacgtagggtgcgagcgttgt…	Bacteria;	k__Bacteria;p__Actinobacteria;c__Actinobacteria;o__Actinomycetales;f__Dietziaceae;g__Dietzia;	Unclassified;	Bacteria;"Actinobacteria";Actinobacteria;Actinobacteridae;Actinomycetales;Corynebacterineae;Dietziaceae;Dietzia;	Bacteria;Actinobacteria;Actinobacteria;Corynebacteriales;Dietziaceae;Dietzia;						Bacteria;Proteobacteria;Gammaproteobacteria;Enterobacteriales;Enterobacteriaceae;Pantoea;	Bacteria	Proteobacteria	Gammaproteobacteria	Enterobacteriales	Enterobacteriaceae	Pantoea	2
AF055_001	cttaactctgggataagcctgggaaactgggtctaataccggataggagcgtctaccgcatggtgggtgttggaaagatttatcggttttggatggactcgcggcctatcagcttgttggtgaggtaatggctcaccaaggcgacgacgggtagccggcctgagagggtgaccggccacactgggactgagacacggcccagactcctacgggaggcagcagtggggaatattgcacaatgggcgaaagcctgatgcagcgacgccgcgtgagggatgacggccttcgggttgtaaacctctttcagtagggaagaagcgaaagtgacggtacctgcagaagaagcaccggctaactacgtgccagcagccgcggtaatacgtagggtgcgagcgttat…	Bacteria;Actinobacteria;Micrococcales;Micrococcaceae;Micrococcus;	k__Bacteria;p__Actinobacteria;c__Actinobacteria;o__Actinomycetales;f__Micrococcaceae;g__Micrococcus;s__luteus;	Unclassified;	Bacteria;"Actinobacteria";Actinobacteria;Actinobacteridae;Actinomycetales;Micrococcineae;Micrococcaceae;Micrococcus;	Bacteria;Actinobacteria;Actinobacteria;Micrococcales;Micrococcaceae;Micrococcus;						Bacteria;Proteobacteria;Gammaproteobacteria;Betaproteobacteriales;Burkholderiaceae;Variovorax;	Bacteria	Proteobacteria	Gammaproteobacteria	Betaproteobacteriales	Burkholderiaceae	Variovorax	2
AF055_002	cttaactctgggataagcctgggaaactgggtctaataccggataggagcgtccaccgcatggtgggtgttggaaagatttatcggttttggatggactcgcggcctatcagcttgttggtgaggtaatggctcaccaaggcgacgacgggtagccggcctgagagggtgaccggccacactgggactgagacacggcccagactcctacgggaggcagcagtggggaatattgcacaatgggcgcaagcctgatgcagcgacgccgcgtgagggatgacggccttcgggttgtaaacctctttcagtagggaagaagcgaaagtgacggtacctgcagaagaagcaccggctaactacgtgccagcagccgcggtaatacgtagggtgcgagcgttat…	Bacteria;Actinobacteria;Micrococcales;Micrococcaceae;Micrococcus;	k__Bacteria;p__Actinobacteria;c__Actinobacteria;o__Actinomycetales;f__Micrococcaceae;g__Micrococcus;s__luteus;	Unclassified;	Bacteria;"Actinobacteria";Actinobacteria;Actinobacteridae;Actinomycetales;Micrococcineae;Micrococcaceae;Micrococcus;	Bacteria;Actinobacteria;Actinobacteria;Micrococcales;Micrococcaceae;Micrococcus;						Bacteria;Firmicutes;Bacilli;Bacillales;Planococcaceae;	Bacteria	Firmicutes	Bacilli	Bacillales	Planococcaceae		0
AF055_003	tataagactgggataacttcgggaaaccggagctaataccggataatatattgaaccgcatggttcaatagtgaaagacggttttgctgtcacttatagatggatccgcgccgcattagctagttggtaaggtaacggcttaccaaggcaacgatgcgtagccgacctgagagggtgatcggccacactggaactgagacacggtccagactcctacgggaggcagcagtagggaatcttccgcaatgggcgaaagcctgacggagcaacgccgcgtgagtgatgaaggtcttcggatcgtaaaactctgttattagggaagaacaaatgtgtaagtaactatgcacgtcttgacggtacctaatcagaaagccacggctaactacgtgccagcagccg…	Bacteria;Firmicutes;Bacilli;Bacillales;Staphylococcaceae;Staphylococcus;	k__Bacteria;p__Firmicutes;c__Bacilli;o__Bacillales;f__Staphylococcaceae;g__Staphylococcus;s__epidermidis;	Unclassified;	Bacteria;Firmicutes;Bacilli;Bacillales;Staphylococcaceae;Staphylococcus;	Bacteria;Firmicutes;Bacilli;Bacillales;Staphylococcaceae;Staphylococcus;						Bacteria;Actinobacteria;Actinobacteria;Micrococcales;Brevibacteriaceae;Brevibacterium;	Bacteria	Actinobacteria	Actinobacteria	Micrococcales	Brevibacteriaceae	Brevibacterium	0
AF055_004	tagtagtgggggatagctcggggaaactcgaattaataccgcatacgacctacgggtgaaagggggcgcaagctcttgctattagatgagcctaaatcagattagctagttggtggggtaaaggcccaccaaggcgacgatctgtaactggtctgagaggatgatcagtcacaccggaactgagacacggtccggactcctacgggaggcagcagtggggaatattggacaatgggggcaaccctgatccagccatgccgcgtgtgtgaagaaggccttttggttgtaaagcactttaagcagggaggagaggctaatggttaatacccattagattagacgttacctgcagaataagcaccggctaactctgtgccagcagccgcggtaatacagagg…	Unclassified;	Unclassified;	Unclassified;	Bacteria;"Proteobacteria";Gammaproteobacteria;Pseudomonadales;Moraxellaceae;Enhydrobacter;	Bacteria;Proteobacteria;Gammaproteobacteria;Pseudomonadales;Moraxellaceae;Enhydrobacter;						Bacteria;Actinobacteria;Actinobacteria;Micrococcales;Micrococcaceae;Pseudarthrobacter;	Bacteria	Actinobacteria	Actinobacteria	Micrococcales	Micrococcaceae	Pseudarthrobacter	1
AF055_005	tataagactgggataacttcgggaaaccggagctaataccggataatatattgaaccgcatggttcaatagtgaaagacggttttgctgtcacttatagatggatccgcgccgcattagctagttggtaaggtaacggcttaccaaggcaacgatgcgtagccgacctgagagggtgatcggccacactggaactgagacacggtccagactcctacgggaggcagcagtagggaatcttccgcaatgggcgaaagcctgacggagcaacgccgcgtgagtgatgaaggtcttcggatcgtaaaactctgttattagggaagaacaaatgtgtaagtaactatgcacgtcttgacggtacctaatcagaaagccacggctaactacgtgccagcagccg…	Bacteria;Firmicutes;Bacilli;Bacillales;Staphylococcaceae;Staphylococcus;	k__Bacteria;p__Firmicutes;c__Bacilli;o__Bacillales;f__Staphylococcaceae;g__Staphylococcus;s__epidermidis;	Unclassified;	Bacteria;Firmicutes;Bacilli;Bacillales;Staphylococcaceae;Staphylococcus;	Bacteria;Firmicutes;Bacilli;Bacillales;Staphylococcaceae;Staphylococcus;						Bacteria;Actinobacteria;Actinobacteria;Micrococcales;Micrococcaceae;Neomicrococcus;	Bacteria	Actinobacteria	Actinobacteria	Micrococcales	Micrococcaceae	Neomicrococcus	1
AF055_006	tgtaagactgggataacttcgggaaaccgaagctaataccggataggatcttctccttcatgggagatgattgaaagatggtttcggctatcacttacagatgggcccgcggtgcattagctagttggtgaggtaacggctcaccaaggcaacgatgcatagccgacctgagagggtgatcggccacactgggactgagacacggcccagactcctacgggaggcagcagtagggaatcttccgcaatggacgaaagtctgacggagcaacgccgcgtgagtgatgaaggctttcgggtcgtaaaactctgttgttagggaagaacaagtacaagagtaactgcttgtaccttgacggtacctaaccagaaagccacggctaactacgtgccagcagcc…	Bacteria;Firmicutes;Bacilli;Bacillales;Bacillaceae;Bacillus;	k__Bacteria;p__Firmicutes;c__Bacilli;o__Bacillales;f__Bacillaceae;g__Bacillus;s__flexus;	Unclassified;	Bacteria;Firmicutes;Bacilli;Bacillales;Bacillaceae 1;Bacillus;	Bacteria;Firmicutes;Bacilli;Bacillales;Bacillaceae;Bacillus;						Bacteria;Firmicutes;Bacilli;Lactobacillales;Streptococcaceae;Streptococcus;	Bacteria	Firmicutes	Bacilli	Lactobacillales	Streptococcaceae	Streptococcus	1
AF055_007	tataagactgggataacttcgggaaaccggagctaataccggataatatattgaaccgcatggttcaatagtgaaagacggttttgctgtcacttatagatggatccgcgccgcattagctagttggtaaggtaacggcttaccaaggcaacgatgcgtagccgacctgagagggtgatcggccacactggaactgagacacggtccagactcctacgggaggcagcagtagggaatcttccgcaatgggcgaaagcctgacggagcaacgccgcgtgagtgatgaaggtcttcggatcgtaaaactctgttattagggaagaacaaatgtgtaagtaactatgcacgtcttgacggtacctaatcagaaagccacggctaactacgtgccagcagccg…	Bacteria;	k__Bacteria;p__Firmicutes;c__Bacilli;o__Bacillales;f__Staphylococcaceae;g__Staphylococcus;s__epidermidis;	Unclassified;	Bacteria;Firmicutes;Bacilli;Bacillales;Staphylococcaceae;Staphylococcus;	Bacteria;Firmicutes;Bacilli;Bacillales;Staphylococcaceae;Staphylococcus;						Bacteria;Actinobacteria;Actinobacteria;Micromonosporales;Micromonosporaceae;Micromonospora;	Bacteria	Actinobacteria	Actinobacteria	Micromonosporales	Micromonosporaceae	Micromonospora	1
AF055_008	tataagactgggataacttcgggaaaccggagctaataccggataatatattgaaccgcatggttcaatagtgaaagacggttttgctgtcacttatagatggatccgcgccgcattagctagttggtaaggtaacggcttaccaaggcaacgatgcgtagccgacctgagagggtgatcggccacactggaactgagacacggtccagactcctacgggaggcagcagtagggaatcttccgcaatgggcgaaagcctgacggagcaacgccgcgtgagtgatgaaggtcttcggatcgtaaaactctgttattagggaagaacaaatgtgtaagtaactatgcacgtcttgacggtacctaatcagaaagccacggctaactacgtgccagcagccg…	Bacteria;Firmicutes;Bacilli;Bacillales;Staphylococcaceae;Staphylococcus;	k__Bacteria;p__Firmicutes;c__Bacilli;o__Bacillales;f__Staphylococcaceae;g__Staphylococcus;s__epidermidis;	Unclassified;	Bacteria;Firmicutes;Bacilli;Bacillales;Staphylococcaceae;Staphylococcus;	Bacteria;Firmicutes;Bacilli;Bacillales;Staphylococcaceae;Staphylococcus;						Bacteria;Actinobacteria;Actinobacteria;Corynebacteriales;Corynebacteriaceae;Corynebacterium 1;	Bacteria	Actinobacteria	Actinobacteria	Corynebacteriales	Corynebacteriaceae	Corynebacterium 1	1
AF055_009	cttaactctgggataagcctgggaaactgggtctaataccggataggagcgtccaccgcatggtgggtgttggaaagatttatcggttttggatggactcgcggcctatcagcttgttggtgaggtaatggctcaccaaggcgacgacgggtagccggcctgagagggtgaccggccacactgggactgagacacggcccagactcctacgggaggcagcagtggggaatattgcacaatgggcgcaagcctgatgcagcgacgccgcgtgagggatgacggccttcgggttgtaaacctctttcagtagggaagaagcgaaagtgacggtacctgcagaagaagcaccggctaactacgtgccagcagccgcggtaatacgtagggtgcgagcgttat…	Bacteria;Actinobacteria;Micrococcales;Micrococcaceae;Micrococcus;	k__Bacteria;p__Actinobacteria;c__Actinobacteria;o__Actinomycetales;f__Micrococcaceae;g__Micrococcus;s__luteus;	Unclassified;	Bacteria;"Actinobacteria";Actinobacteria;Actinobacteridae;Actinomycetales;Micrococcineae;Micrococcaceae;Micrococcus;	Bacteria;Actinobacteria;Actinobacteria;Micrococcales;Micrococcaceae;Micrococcus;						Bacteria;Actinobacteria;Actinobacteria;Micrococcales;Microbacteriaceae;Agromyces;	Bacteria	Actinobacteria	Actinobacteria	Micrococcales	Microbacteriaceae	Agromyces	1
AF055_012	tataagactgggataacttcgggaaaccggagctaataccggataacatgttgaaccgcatggttcaacagtgaaagacggtcttgctgtcacttatagatggatccgcgccgcattagctagttggtaaggtaacggcttaccaaggcaacgatgcgtagccgacctgagagggtgatcggccacactggaactgagacacggtccagactcctacgggaggcagcagtagggaatcttccgcaatgggcgaaagcctgacggagcaacgccgcgtgagtgaagaaggtcttcggatcgtaaaactctgttattagggaagaacaaatgtgtaagtaactatgcacgtcttgacggtacctaatcagaaagccacggctaactacgtgccagcagccg…	Bacteria;	k__Bacteria;p__Firmicutes;c__Bacilli;o__Bacillales;f__Staphylococcaceae;g__Staphylococcus;	Unclassified;	Bacteria;Firmicutes;Bacilli;Bacillales;Staphylococcaceae;Staphylococcus;	Bacteria;Firmicutes;Bacilli;Bacillales;Staphylococcaceae;Staphylococcus;						Bacteria;Firmicutes;Bacilli;Bacillales;Paenibacillaceae;Brevibacillus;	Bacteria	Firmicutes	Bacilli	Bacillales	Paenibacillaceae	Brevibacillus	1
AF055_013	tataagactgggataacttcgggaaaccggagctaataccggataacatgttgaaccgcatggttcaacagtgaaagacggtcttgctgtcacttatagatggatccgcgccgcattagctagttggtaaggtaacggcttaccaaggcaacgatgcgtagccgacctgagagggtgatcggccacactggaactgagacacggtccagactcctacgggaggcagcagtagggaatcttccgcaatgggcgaaagcctgacggagcaacgccgcgtgagtgaagaaggtcttcggatcgtaaaactctgttattagggaagaacaaatgtgtaagtaactatgcacgtcttgacggtacctaatcagaaagccacggctaactacgtgccagcagccg…	Bacteria;	k__Bacteria;p__Firmicutes;c__Bacilli;o__Bacillales;f__Staphylococcaceae;g__Staphylococcus;	Bacteria;Firmicutes;Bacilli;Bacillales;Staphylococcaceae;Staphylococcus;	Bacteria;Firmicutes;Bacilli;Bacillales;Staphylococcaceae;Staphylococcus;	Bacteria;Firmicutes;Bacilli;Bacillales;Staphylococcaceae;Staphylococcus;						Bacteria;Firmicutes;Bacilli;Bacillales;Bacillaceae;Fictibacillus;	Bacteria	Firmicutes	Bacilli	Bacillales	Bacillaceae	Fictibacillus	1
AF055_015	cttacctcggggataagcctgggaaactgggtctaataccggataggagcgtccaccgcatggtgggtgttggaaagatttatcggttttggatggactcgcggcctatcagcttgttggtgaggtaatggctcaccaaggcgacgacgggtagccggcctgagagggtgaccggccacactgggactgagacacggcccagactcctacgggaggcagcagtggggaatattgcacaatgggcgcaagcctgatgcagcgacgccgcgtgagggatgacggccttcgggttgtaaacctctttcagtagggaagaagcgaaagtgacggtacctgcagaagaagcaccggctaactacgtgccagcagccgcggtaatacgtagggtgcgagcgttat…	Bacteria;Actinobacteria;Micrococcales;Micrococcaceae;Micrococcus;	k__Bacteria;p__Actinobacteria;c__Actinobacteria;o__Actinomycetales;f__Micrococcaceae;g__Micrococcus;s__luteus;	Unclassified;	Bacteria;"Actinobacteria";Actinobacteria;Actinobacteridae;Actinomycetales;Micrococcineae;Micrococcaceae;Micrococcus;	Bacteria;Actinobacteria;Actinobacteria;Micrococcales;Micrococcaceae;Micrococcus;						Bacteria;Firmicutes;Bacilli;Bacillales;Planococcaceae;Psychrobacillus;	Bacteria	Firmicutes	Bacilli	Bacillales	Planococcaceae	Psychrobacillus	1
AF055_016	tataagactgggataacttcgggaaaccggagctaataccggataatatattgaaccgcatggttcaatagtgaaagacggttttgctgtcacttatagatggatccgcgccgcattagctagttggtaaggtaacggcttaccaaggcaacgatgcgtagccgacctgagagggtgatcggccacactggaactgagacacggtccagactcctacgggaggcagcagtagggaatcttccgcaatgggcgaaagcctgacggagcaacgccgcgtgagtgatgaaggtcttcggatcgtaaaactctgttattagggaagaacaaatgtgtaagtaactatgcacgtcttgacggtacctaatcagaaagccacggctaactacgtgccagcagccg…	Bacteria;Firmicutes;Bacilli;Bacillales;Staphylococcaceae;Staphylococcus;	k__Bacteria;p__Firmicutes;c__Bacilli;o__Bacillales;f__Staphylococcaceae;g__Staphylococcus;s__epidermidis;	Unclassified;	Bacteria;Firmicutes;Bacilli;Bacillales;Staphylococcaceae;Staphylococcus;	Bacteria;Firmicutes;Bacilli;Bacillales;Staphylococcaceae;Staphylococcus;						Bacteria;Actinobacteria;Actinobacteria;Micrococcales;Microbacteriaceae;Curtobacterium;	Bacteria	Actinobacteria	Actinobacteria	Micrococcales	Microbacteriaceae	Curtobacterium	1
AF055_017	cccctcttcgggataacctcgggaaatcggggctaataccggatatgacttcgcaccgcatggtgtgttgtggaaagtttttcggtgggggatggactcgcggcctatcagtttgttggtgaggtaatggctcaccaaggcgatgacgggtagccggcctgagagggcgaccggccacactgggactgagacacggcccagactcctacgggaggcagcagtggggaatattgcacaatgggcggaagcctgatgcagcgacgccgcgtgggggatgacggccttcgggttgtaaacctctttcagcagggaagaagcgagagtgacggtacctgcagaagaagcgccggctaactacgtgccagcagccgcggtaatacgtagggcgcaagcgttgtc…	Bacteria;	k__Bacteria;p__Actinobacteria;c__Actinobacteria;o__Actinomycetales;f__Dermabacteraceae;g__Brachybacterium;	Unclassified;	Bacteria;"Actinobacteria";Actinobacteria;Actinobacteridae;Actinomycetales;Micrococcineae;Dermabacteraceae;Brachybacterium;	Bacteria;Actinobacteria;Actinobacteria;Micrococcales;Dermabacteraceae;Brachybacterium;						Bacteria;Actinobacteria;Actinobacteria;Micrococcales;Micrococcaceae;Rothia;	Bacteria	Actinobacteria	Actinobacteria	Micrococcales	Micrococcaceae	Rothia	1
AF055_018	tataagactgggataacttcgggaaaccggagctaataccggataatatattgaaccgcatggttcaatagtgaaagacggttttgctgtcacttatagatggatccgcgccgcattagctagttggtaaggtaacggcttaccaaggcaacgatgcgtagccgacctgagagggtgatcggccacactggaactgagacacggtccagactcctacgggaggcagcagtagggaatcttccgcaatgggcgaaagcctgacggagcaacgccgcgtgagtgatgaaggtcttcggatcgtaaaactctgttattagggaagaacaaatgtgtaagtaactatgcacgtcttgacggtacctaatcagaaagccacggctaactacgtgccagcagccg…	Bacteria;Firmicutes;Bacilli;Bacillales;Staphylococcaceae;Staphylococcus;	k__Bacteria;p__Firmicutes;c__Bacilli;o__Bacillales;f__Staphylococcaceae;g__Staphylococcus;s__epidermidis;	Unclassified;	Bacteria;Firmicutes;Bacilli;Bacillales;Staphylococcaceae;Staphylococcus;	Bacteria;Firmicutes;Bacilli;Bacillales;Staphylococcaceae;Staphylococcus;						Bacteria;Proteobacteria;Gammaproteobacteria;Xanthomonadales;Xanthomonadaceae;Stenotrophomonas;	Bacteria	Proteobacteria	Gammaproteobacteria	Xanthomonadales	Xanthomonadaceae	Stenotrophomonas	1
AF055_020	cttaactctgggataagcctgggaaactgggtctaataccggataggagcgtccaccgcatggtgggtgttggaaagatttatcggttttggatggactcgcggcctatcagcttgttggtgaggtaatggctcaccaaggcgacgacgggtagccggcctgagagggtgaccggccacactgggactgagacacggcccagactcctacgggaggcagcagtggggaatattgcacaatgggcgcaagcctgatgcagcgacgccgcgtgagggatgacggccttcgggttgtaaacctctttcagtagggaagaagcgaaagtgacggtacctgcagaagaagcaccggctaactacgtgccagcagccgcggtaatacgtagggtgcgagcgttat…	Bacteria;Actinobacteria;Micrococcales;Micrococcaceae;Micrococcus;	k__Bacteria;p__Actinobacteria;c__Actinobacteria;o__Actinomycetales;f__Micrococcaceae;g__Micrococcus;s__luteus;	Unclassified;	Bacteria;"Actinobacteria";Actinobacteria;Actinobacteridae;Actinomycetales;Micrococcineae;Micrococcaceae;Micrococcus;	Bacteria;Actinobacteria;Actinobacteria;Micrococcales;Micrococcaceae;Micrococcus;						Bacteria;Actinobacteria;Actinobacteria;Micrococcales;Dermabacteraceae;Dermabacter;	Bacteria	Actinobacteria	Actinobacteria	Micrococcales	Dermabacteraceae	Dermabacter	1
AF055_022	tataagactgggataacttcgggaaaccggagctaataccggataatatattgaaccgcatggttcaatagtgaaagacggttttgctgtcacttatagatggatccgcgccgcattagctagttggtaaggtaacggcttaccaaggcaacgatgcgtagccgacctgagagggtgatcggccacactggaactgagacacggtccagactcctacgggaggcagcagtagggaatcttccgcaatgggcgaaagcctgacggagcaacgccgcgtgagtgatgaaggtcttcggatcgtaaaactctgttattagggaagaacaaatgtgtaagtaactatgcacgtcttgacggtacctaatcagaaagccacggctaactacgtgccagcagccg…	Bacteria;Firmicutes;Bacilli;Bacillales;Staphylococcaceae;Staphylococcus;	k__Bacteria;p__Firmicutes;c__Bacilli;o__Bacillales;f__Staphylococcaceae;g__Staphylococcus;s__epidermidis;	Unclassified;	Bacteria;Firmicutes;Bacilli;Bacillales;Staphylococcaceae;Staphylococcus;	Bacteria;Firmicutes;Bacilli;Bacillales;Staphylococcaceae;Staphylococcus;						Bacteria;Proteobacteria;Gammaproteobacteria;Betaproteobacteriales;Burkholderiaceae;Rhodoferax;	Bacteria	Proteobacteria	Gammaproteobacteria	Betaproteobacteriales	Burkholderiaceae	Rhodoferax	1
AF055_023	tataagactgggataacttcgggaaaccggagctaataccggataacatgttgaaccgcatggttcaacagtgaaagacggtcttgctgtcacttatagatggatccgcgccgcattagctagttggtaaggtaacggcttaccaaggcaacgatgcgtagccgacctgagagggtgatcggccacactggaactgagacacggtccagactcctacgggaggcagcagtagggaatcttccgcaatgggcgaaagcctgacggagcaacgccgcgtgagtgaagaaggtcttcggatcgtaaaactctgttattagggaagaacaaatgtgtaagtaactatgcacgtcttgacggtacctaatcagaaagccacggctaactacgtgccagcagccg…	Bacteria;	k__Bacteria;p__Firmicutes;c__Bacilli;o__Bacillales;f__Staphylococcaceae;g__Staphylococcus;	Unclassified;	Bacteria;Firmicutes;Bacilli;Bacillales;Staphylococcaceae;Staphylococcus;	Bacteria;Firmicutes;Bacilli;Bacillales;Staphylococcaceae;Staphylococcus;						Bacteria;Actinobacteria;Actinobacteria;Micrococcales;Cellulomonadaceae;Cellulomonas;	Bacteria	Actinobacteria	Actinobacteria	Micrococcales	Cellulomonadaceae	Cellulomonas	1
AF055_024	tataagactgggataacttcgggaaaccggagctaataccggataacatgttgaaccgcatggttcaacagtgaaagacggtcttgctgtcacttatagatggatccgcgccgcattagctagttggtaaggtaacggcttaccaaggcaacgatgcgtagccgacctgagagggtgatcggccacactggaactgagacacggtccagactcctacgggaggcagcagtagggaatcttccgcaatgggcgaaagcctgacggagcaacgccgcgtgagtgaagaaggtcttcggatcgtaaaactctgttattagggaagaacaaatgtgtaagtaactatgcacgtcttgacggtacctaatcagaaagccacggctaactacgtgccagcagccg…	Bacteria;	k__Bacteria;p__Firmicutes;c__Bacilli;o__Bacillales;f__Staphylococcaceae;g__Staphylococcus;	Unclassified;	Bacteria;Firmicutes;Bacilli;Bacillales;Staphylococcaceae;Staphylococcus;	Bacteria;Firmicutes;Bacilli;Bacillales;Staphylococcaceae;Staphylococcus;						Bacteria;Proteobacteria;Alphaproteobacteria;Sphingomonadales;Sphingomonadaceae;Sphingomonas;	Bacteria	Proteobacteria	Alphaproteobacteria	Sphingomonadales	Sphingomonadaceae	Sphingomonas	1
AF056_001	tattagtgggggacaacgttccgaaaggagcgctaataccgcatacgtcctacgggagaaagcaggggacctttgggccttgcgctaatagatgagcctaagtcggattagctagttggtagggtaaaggcctaccaaggcgacgatctgtagcgggtctgagaggatgatccgccacactgggactgagacacggcccagactcctacgggaggcagcagtggggaatattggacaatggggggaaccctgatccagccatgccgcgtgtgtgaagaaggccttttggttgtaaagcactttaagcgaggaggaggctacctagattaatactttaggatagtggacgttactcgcagaataagcaccggctaactctgtgccagcagccgcggtaat…	Bacteria;	k__Bacteria;p__Proteobacteria;c__Gammaproteobacteria;o__Pseudomonadales;f__Moraxellaceae;g__Acinetobacter;	Unclassified;	Bacteria;"Proteobacteria";Gammaproteobacteria;Pseudomonadales;Moraxellaceae;Acinetobacter;	Bacteria;Proteobacteria;Gammaproteobacteria;Pseudomonadales;Moraxellaceae;Acinetobacter;						Bacteria;Firmicutes;Bacilli;Lactobacillales;Enterococcaceae;Enterococcus;	Bacteria	Firmicutes	Bacilli	Lactobacillales	Enterococcaceae	Enterococcus	1
AF056_002	tataagactgggataacttcgggaaaccggagctaataccggataatatttcgaaccgcatggttcgatagtgaaagatggctttgctatcacttatagatggacctgcgccgtattagctagttggtaaggtaacggcttaccaaggcaacgatacgtagccgacctgagagggtgatcggccacactggaactgagacacggtccagactcctacgggaggcagcagtagggaatcttccgcaatgggcgaaagcctgacggagcaacgccgcgtgagtgatgaaggtcttcggatcgtaaaactctgttattagggaagaacaaacgtgtaagtaactgtgcacgtcttgacggtacctaatcagaaagccacggctaactacgtgccagcagccg…	Bacteria;	k__Bacteria;p__Firmicutes;c__Bacilli;o__Bacillales;f__Staphylococcaceae;g__Staphylococcus;	Unclassified;	Bacteria;Firmicutes;Bacilli;Bacillales;Staphylococcaceae;Staphylococcus;	Bacteria;Firmicutes;Bacilli;Bacillales;Staphylococcaceae;Staphylococcus;
AF056_003	cttaactctgggataagcctgggaaactgggtctaataccggataggagcgcccaccgcatggtgggtgttggaaagatttatcggttttggatggactcgcggcctatcagcttgttggtgaggtaatggctcaccaaggcgacgacgggtagccggcctgagagggtgaccggccacactgggactgagacacggcccagactcctacgggaggcagcagtggggaatattgcacaatgggcgaaagcctgatgcagcgacgccgcgtgagggatgacggccttcgggttgtaaacctctttcagtagggaagaagcgaaagtgacggtacctgcagaagaagcaccggctaactacgtgccagcagccgcggtaatacgtagggtgcgagcgttat…	Bacteria;Actinobacteria;Micrococcales;Micrococcaceae;Micrococcus;	k__Bacteria;p__Actinobacteria;c__Actinobacteria;o__Actinomycetales;f__Micrococcaceae;g__Micrococcus;s__luteus;	Bacteria;Actinobacteria;Actinobacteria;Micrococcales;Micrococcaceae;Micrococcus;	Bacteria;"Actinobacteria";Actinobacteria;Actinobacteridae;Actinomycetales;Micrococcineae;Micrococcaceae;Micrococcus;	Bacteria;Actinobacteria;Actinobacteria;Micrococcales;Micrococcaceae;Micrococcus;
AF056_004	tataagactgggataacttcgggaaaccggagctaataccggataatatattgaaccgcatggttcaatagtgaaagacggttttgctgtcacttatagatggatccgcgccgcattagctagttggtaaggtaacggcttaccaaggcaacgatgcgtagccgacctgagagggtgatcggccacactggaactgagacacggtccagactcctacgggaggcagcagtagggaatcttccgcaatgggcgaaagcctgacggagcaacgccgcgtgagtgatgaaggtcttcggatcgtaaaactctgttattagggaagaacaaatgtgtaagtaactatgcacgtcttgacggtacctaatcagaaagccacggctaactacgtgccagcagccg…	Bacteria;Firmicutes;Bacilli;Bacillales;Staphylococcaceae;Staphylococcus;	k__Bacteria;p__Firmicutes;c__Bacilli;o__Bacillales;f__Staphylococcaceae;g__Staphylococcus;s__epidermidis;	Unclassified;	Bacteria;Firmicutes;Bacilli;Bacillales;Staphylococcaceae;Staphylococcus;	Bacteria;Firmicutes;Bacilli;Bacillales;Staphylococcaceae;Staphylococcus;
AF056_005	cttaactctgggataagcctgggaaactgggtctaataccggataggagcgtccaccgcatggtgggtgttggaaagatttatcggttttggatggactcgcggcctatcagcttgttggtgaggtaatggctcaccaaggcgacgacgggtagccggcctgagagggtgaccggccacactgggactgagacacggcccagactcctacgggaggcagcagtggggaatattgcacaatgggcgaaagcctgatgcagcgacgccgcgtgagggatgacggccttcgggttgtaaacctctttcagtagggaagaagcgaaagtgacggtacctgcagaagaagcaccggctaactacgtgccagcagccgcggtaatacgtagggtgcgagcgttat…	Bacteria;Actinobacteria;Micrococcales;Micrococcaceae;	k__Bacteria;p__Actinobacteria;c__Actinobacteria;o__Actinomycetales;f__Micrococcaceae;g__Micrococcus;s__luteus;	Bacteria;Actinobacteria;Actinobacteria;Micrococcales;Micrococcaceae;Micrococcus;	Bacteria;"Actinobacteria";Actinobacteria;Actinobacteridae;Actinomycetales;Micrococcineae;Micrococcaceae;Micrococcus;	Bacteria;Actinobacteria;Actinobacteria;Micrococcales;Micrococcaceae;Micrococcus;
AF056_006	cttaactctgggataagcctgggaaactgggtctaataccggataggagcgtccaccgcatggtgggtgttggaaagatttatcggttttggatggactcgcggcctatcagcttgttggtgaggtaatggctcaccaaggcgacgacgggtagccggcctgagagggtgaccggccacactgggactgagacacggcccagactcctacgggaggcagcagtggggaatattgcacaatgggcgaaagcctgatgcagcgacgccgcgtgagggatgacggccttcgggttgtaaacctctttcagtagggaagaagcgaaagtgacggtacctgcagaagaagcaccggctaactacgtgccagcagccgcggtaatacgtagggtgcgagcgttat…	Bacteria;Actinobacteria;Micrococcales;Micrococcaceae;Micrococcus;	k__Bacteria;p__Actinobacteria;c__Actinobacteria;o__Actinomycetales;f__Micrococcaceae;g__Micrococcus;s__luteus;	Unclassified;	Bacteria;"Actinobacteria";Actinobacteria;Actinobacteridae;Actinomycetales;Micrococcineae;Micrococcaceae;Micrococcus;	Bacteria;Actinobacteria;Actinobacteria;Micrococcales;Micrococcaceae;Micrococcus;
AF056_007	tataagactgggataacttcgggaaaccggagctaataccggataatatttcgaaccgcatggttcgatagtgaaagatggctttgctatcacttatagatggacctgcgccgtattagctagttggtaaggtaacggcttaccaaggcaacgatacgtagccgacctgagagggtgatcggccacactggaactgagacacggtccagactcctacgggaggcagcagtagggaatcttccgcaatgggcgaaagcctgacggagcaacgccgcgtgagtgatgaaggtcttcggatcgtaaaactctgttattagggaagaacaaacgtgtaagtaactgtgcacgtcttgacggtacctaatcagaaagccacggctaactacgtgccagcagccg…	Bacteria;	k__Bacteria;p__Firmicutes;c__Bacilli;o__Bacillales;f__Staphylococcaceae;g__Staphylococcus;	Unclassified;	Bacteria;Firmicutes;Bacilli;Bacillales;Staphylococcaceae;Staphylococcus;	Bacteria;Firmicutes;Bacilli;Bacillales;Staphylococcaceae;Staphylococcus;
AF056_008	tataagactgggataacttcgggaaaccggagctaataccggataatatttcgaaccgcatggttcgatagtgaaagatggctttgctatcacttatagatggacctgcgccgtattagctagttggtaaggtaacggcttaccaaggcaacgatacgtagccgacctgagagggtgatcggccacactggaactgagacacggtccagactcctacgggaggcagcagtagggaatcttccgcaatgggcgaaagcctgacggagcaacgccgcgtgagtgatgaaggtcttcggatcgtaaaactctgttattagggaagaacaaacgtgtaagtaactgtgcacgtcttgacggtacctaatcagaaagccacggctaactacgtgccagcagccg…	Bacteria;	k__Bacteria;p__Firmicutes;c__Bacilli;o__Bacillales;f__Staphylococcaceae;g__Staphylococcus;	Unclassified;	Bacteria;Firmicutes;Bacilli;Bacillales;Staphylococcaceae;Staphylococcus;	Bacteria;Firmicutes;Bacilli;Bacillales;Staphylococcaceae;Staphylococcus;
AF056_009	cttaactctgggataagcctgggaaactgggtctaataccggataggagcgtccaccgcatggtgggtgttggaaagatttatcggttttggatggactcgcggcctatcagcttgttggtgaggtaatggctcaccaaggcgacgacgggtagccggcctgagagggtgaccggccacactgggactgagacacggcccagactcctacgggaggcagcagtggggaatattgcacaatgggcgcaagcctgatgcagcgacgccgcgtgagggatgacggccttcgggttgtaaacctctttcagtagggaagaagcgaaagtgacggtacctgcagaagaagcaccggctaactacgtgccagcagccgcggtaatacgtagggtgcgagcgttat…	Bacteria;Actinobacteria;Micrococcales;Micrococcaceae;Micrococcus;	k__Bacteria;p__Actinobacteria;c__Actinobacteria;o__Actinomycetales;f__Micrococcaceae;g__Micrococcus;s__luteus;	Unclassified;	Bacteria;"Actinobacteria";Actinobacteria;Actinobacteridae;Actinomycetales;Micrococcineae;Micrococcaceae;Micrococcus;	Bacteria;Actinobacteria;Actinobacteria;Micrococcales;Micrococcaceae;Micrococcus;
AF056_010	cttaactctgggataagcctgggaaactgggtctaataccggataggagcgtccaccgcatggtgggtgttggaaagatttatcggttttggatggactcgcggcctatcagcttgttggtgaggtaatggctcaccaaggcgacgacgggtagccggcctgagagggtgaccggccacactgggactgagacacggcccagactcctacgggaggcagcagtggggaatattgcacaatgggcgcaagcctgatgcagcgacgccgcgtgagggatgacggccttcgggttgtaaacctctttcagtagggaagaagcgaaagtgacggtacctgcagaagaagcaccggctaactacgtgccagcagccgcggtaatacgtagggtgcgagcgttat…	Bacteria;Actinobacteria;Micrococcales;Micrococcaceae;Micrococcus;	k__Bacteria;p__Actinobacteria;c__Actinobacteria;o__Actinomycetales;f__Micrococcaceae;g__Micrococcus;s__luteus;	Unclassified;	Bacteria;"Actinobacteria";Actinobacteria;Actinobacteridae;Actinomycetales;Micrococcineae;Micrococcaceae;Micrococcus;	Bacteria;Actinobacteria;Actinobacteria;Micrococcales;Micrococcaceae;Micrococcus;
AF056_011	tataagactgggataacttcgggaaaccggagctaataccggataatatttcgaaccgcatggttcgatagtgaaagatggctctgctatcacttatagatggacctgcgccgtattagctagttggtaaggtaacggcttaccaaggcaacgatacgtagccgacctgagagggtgatcggccacactggaactgagacacggtccagactcctacgggaggcagcagtagggaatcttccgcaatgggcgaaagcctgacggagcaacgccgcgtgagtgatgaaggtcttcggatcgtaaaactctgttattagggaagaacaaacgtgtaagtaactgtgcacgtcttgacggtacctaatcagaaagccacggctaactacgtgccagcagccg…	Bacteria;Firmicutes;Bacilli;Bacillales;Staphylococcaceae;Staphylococcus;	k__Bacteria;p__Firmicutes;c__Bacilli;o__Bacillales;f__Staphylococcaceae;g__Staphylococcus;	Unclassified;	Bacteria;Firmicutes;Bacilli;Bacillales;Staphylococcaceae;Staphylococcus;	Bacteria;Firmicutes;Bacilli;Bacillales;Staphylococcaceae;Staphylococcus;
AF056_012	tataagactgggataacttcgggaaaccggagctaataccggataatatttcgaaccgcatggttcgatagtgaaagatggctctgctatcacttatagatggacctgcgccgtattagctagttggtaaggtaacggcttaccaaggcaacgatacgtagccgacctgagagggtgatcggccacactggaactgagacacggtccagactcctacgggaggcagcagtagggaatcttccgcaatgggcgaaagcctgacggagcaacgccgcgtgagtgatgaaggtcttcggatcgtaaaactctgttattagggaagaacaaacgtgtaagtaactgtgcacgtcttgacggtacctaatcagaaagccacggctaactacgtgccagcagccg…	Bacteria;Firmicutes;Bacilli;Bacillales;Staphylococcaceae;Staphylococcus;	k__Bacteria;p__Firmicutes;c__Bacilli;o__Bacillales;f__Staphylococcaceae;g__Staphylococcus;	Unclassified;	Bacteria;Firmicutes;Bacilli;Bacillales;Staphylococcaceae;Staphylococcus;	Bacteria;Firmicutes;Bacilli;Bacillales;Staphylococcaceae;Staphylococcus;
AF056_013	tataagactgggataacttcgggaaaccggagctaataccggataatatttcgaaccgcatggttcgatagtgaaagatggctctgctatcacttatagatggacctgcgccgtattagctagttggtaaggtaacggcttaccaaggcaacgatacgtagccgacctgagagggtgatcggccacactggaactgagacacggtccagactcctacgggaggcagcagtagggaatcttccgcaatgggcgaaagcctgacggagcaacgccgcgtgagtgatgaaggtcttcggatcgtaaaactctgttattagggaagaacaaacgtgtaagtaactgtgcacgtcttgacggtacctaatcagaaagccacggctaactacgtgccagcagccg…	Bacteria;Firmicutes;Bacilli;Bacillales;Staphylococcaceae;Staphylococcus;	k__Bacteria;p__Firmicutes;c__Bacilli;o__Bacillales;f__Staphylococcaceae;g__Staphylococcus;	Unclassified;	Bacteria;Firmicutes;Bacilli;Bacillales;Staphylococcaceae;Staphylococcus;	Bacteria;Firmicutes;Bacilli;Bacillales;Staphylococcaceae;Staphylococcus;
AF056_014	cttaactctgggataagcctgggaaactgggtctaataccggataggagcgtccaccgcatggtgggtgttggaaagatttatcggttttggatggactcgcggcctatcagcttgttggtgaggtaatggctcaccaaggcgacgacgggtagccggcctgagagggtgaccggccacactgggactgagacacggcccagactcctacgggaggcagcagtggggaatattgcacaatgggcgcaagcctgatgcagcgacgccgcgtgagggatgacggccttcgggttgtaaacctctttcagtagggaagaagcgaaagtgacggtacctgcagaagaagcaccggctaactacgtgccagcagccgcggtaatacgtagggtgcgagcgttat…	Bacteria;Actinobacteria;Micrococcales;Micrococcaceae;Micrococcus;	k__Bacteria;p__Actinobacteria;c__Actinobacteria;o__Actinomycetales;f__Micrococcaceae;g__Micrococcus;s__luteus;	Unclassified;	Bacteria;"Actinobacteria";Actinobacteria;Actinobacteridae;Actinomycetales;Micrococcineae;Micrococcaceae;Micrococcus;	Bacteria;Actinobacteria;Actinobacteria;Micrococcales;Micrococcaceae;Micrococcus;
AF056_015	tataagactgggataacttcgggaaaccggagctaataccggataatatattgaaccgcatggttcaatagtgaaagacggttttgctgtcacttatagatggatccgcgccgcattagctagttggtaaggtaacggcttaccaaggcaacgatgcgtagccgacctgagagggtgatcggccacactggaactgagacacggtccagactcctacgggaggcagcagtagggaatcttccgcaatgggcgaaagcctgacggagcaacgccgcgtgagtgatgaaggtcttcggatcgtaaaactctgttattagggaagaacaaatgtgtaagtaactatgcacgtcttgacggtacctaatcagaaagccacggctaactacgtgccagcagccg…	Bacteria;Firmicutes;Bacilli;Bacillales;Staphylococcaceae;Staphylococcus;	Unclassified;	Unclassified;	Bacteria;Firmicutes;Bacilli;Bacillales;Staphylococcaceae;Staphylococcus;	Bacteria;Firmicutes;Bacilli;Bacillales;Staphylococcaceae;Staphylococcus;
AF056_016	cttaactctgggataagcctgggaaactgggtctaataccggataggagcgtccaccgcatggtgggtgttggaaagatttatcggttttggatggactcgcggcctatcagcttgttggtgaggtaatggctcaccaaggcgacgacgggtagccggcctgagagggtgaccggccacactgggactgagacacggcccagactcctacgggaggcagcagtggggaatattgcacaatgggcgcaagcctgatgcagcgacgccgcgtgagggatgacggccttcgggttgtaaacctctttcagtagggaagaagcgaaagtgacggtacctgcagaagaagcaccggctaactacgtgccagcagccgcggtaatacgtagggtgcgagcgttat…	Bacteria;Actinobacteria;Micrococcales;Micrococcaceae;Micrococcus;	k__Bacteria;p__Actinobacteria;c__Actinobacteria;o__Actinomycetales;f__Micrococcaceae;g__Micrococcus;s__luteus;	Unclassified;	Bacteria;"Actinobacteria";Actinobacteria;Actinobacteridae;Actinomycetales;Micrococcineae;Micrococcaceae;Micrococcus;	Bacteria;Actinobacteria;Actinobacteria;Micrococcales;Micrococcaceae;Micrococcus;
AF056_017	cttaactctgggataagcctgggaaactgggtctaataccggataggagcgtccaccgcatggtgggtgttggaaagatttatcggttttggatggactcgcggcctatcagcttgttggtgaggtaatggctcaccaaggcgacgacgggtagccggcctgagagggtgaccggccacactgggactgagacacggcccagactcctacgggaggcagcagtggggaatattgcacaatgggcgcaagcctgatgcagcgacgccgcgtgagggatgacggccttcgggttgtaaacctctttcagtagggaagaagcgaaagtgacggtacctgcagaagaagcaccggctaactacgtgccagcagccgcggtaatacgtagggtgcgagcgttat…	Bacteria;Actinobacteria;Micrococcales;Micrococcaceae;Micrococcus;	k__Bacteria;p__Actinobacteria;c__Actinobacteria;o__Actinomycetales;f__Micrococcaceae;g__Micrococcus;s__luteus;	Unclassified;	Bacteria;"Actinobacteria";Actinobacteria;Actinobacteridae;Actinomycetales;Micrococcineae;Micrococcaceae;Micrococcus;	Bacteria;Actinobacteria;Actinobacteria;Micrococcales;Micrococcaceae;Micrococcus;
AF057_001	tataagactgggataacttcgggaaaccggagctaataccggataatatttcgaaccgcatggttcgatagtgaaagatggctctgctatcacttatagatggacctgcgccgtattagctagttggtaaggtaacggcttaccaaggcaacgatacgtagccgacctgagagggtgatcggccacactggaactgagacacggtccagactcctacgggaggcagcagtagggaatcttccgcaatgggcgaaagcctgacggagcaacgccgcgtgagtgatgaaggtcttcggatcgtaaaactctgttattagggaagaacaaacgtgtaagtaactgtgcacgtcttgacggtacctaatcagaaagccacggctaactacgtgccagcagccg…	Bacteria;Firmicutes;Bacilli;Bacillales;Staphylococcaceae;Staphylococcus;	k__Bacteria;p__Firmicutes;c__Bacilli;o__Bacillales;f__Staphylococcaceae;g__Staphylococcus;	Unclassified;	Bacteria;Firmicutes;Bacilli;Bacillales;Staphylococcaceae;Staphylococcus;	Bacteria;Firmicutes;Bacilli;Bacillales;Staphylococcaceae;Staphylococcus;
AF057_002	tataagactgggataacttcgggaaaccggagctaataccggataacatattgaaccgcatggttcaatagtgaaaggcggctttgctgtcacttatagatggatccgcgccgtattagctagttggtaaggtgacggcttaccaaggcaacgatacgtagccgacctgagagggtgatcggccacactggaactgagacacggtccagactcctacgggaggcagcagtagggaatcttccgcaatgggcgaaagcctgacggagcaacgccgcgtgagtgatgaaggtcttcggatcgtaaaactctgttatcagggaagaacaaatgtgtaagtaactgtgcacatcttgacggtacctgatcagaaagccacggctaactacgtgccagcagccg…	Bacteria;Firmicutes;Bacilli;Bacillales;Staphylococcaceae;Staphylococcus;	k__Bacteria;p__Firmicutes;c__Bacilli;o__Bacillales;f__Staphylococcaceae;g__Staphylococcus;	Unclassified;	Bacteria;Firmicutes;Bacilli;Bacillales;Staphylococcaceae;Staphylococcus;	Bacteria;Firmicutes;Bacilli;Bacillales;Staphylococcaceae;Staphylococcus;
AF057_003	tataagactgggataacttcgggaaaccggagctaataccggataatatttcgaaccgcatggttcgatagtgaaagatggctttgctatcacttatagatggacctgcgccgtattagctagttggtaaggtaacggcttaccaaggcaacgatacgtagccgacctgagagggtgatcggccacactggaactgagacacggtccagactcctacgggaggcagcagtagggaatcttccgcaatgggcgaaagcctgacggagcaacgccgcgtgagtgatgaaggtcttcggatcgtaaaactctgttattagggaagaacaaacgtgtaagtaactgtgcacgtcttgacggtacctaatcagaaagccacggctaactacgtgccagcagccg…	Bacteria;	k__Bacteria;p__Firmicutes;c__Bacilli;o__Bacillales;f__Staphylococcaceae;g__Staphylococcus;	Unclassified;	Bacteria;Firmicutes;Bacilli;Bacillales;Staphylococcaceae;Staphylococcus;	Bacteria;Firmicutes;Bacilli;Bacillales;Staphylococcaceae;Staphylococcus;
AF057_004	tataagactgggataacttcgggaaaccggagctaataccggataacatattgaaccgcatggttcaatagtgaaaggcggctttgctgtcacttatagatggatccgcgccgtattagctagttggtaaggtgacggcttaccaaggcaacgatacgtagccgacctgagagggtgatcggccacactggaactgagacacggtccagactcctacgggaggcagcagtagggaatcttccgcaatgggcgaaagcctgacggagcaacgccgcgtgagtgatgaaggtcttcggatcgtaaaactctgttatcagggaagaacaaatgtgtaagtaactgtgcacatcttgacggtacctgatcagaaagccacggctaactacgtgccagcagccg…	Bacteria;Firmicutes;Bacilli;Bacillales;Staphylococcaceae;Staphylococcus;	k__Bacteria;p__Firmicutes;c__Bacilli;o__Bacillales;f__Staphylococcaceae;g__Staphylococcus;	Unclassified;	Bacteria;Firmicutes;Bacilli;Bacillales;Staphylococcaceae;Staphylococcus;	Bacteria;Firmicutes;Bacilli;Bacillales;Staphylococcaceae;Staphylococcus;
AF057_005	tataagactgggataacttcgggaaaccggagctaataccggataatattttgaaccgcatggttcaaaagtgaaagacggtcttgctgtcacttatagatggatccgcgctgcattagctagttggtaaggtaacggcttaccaaggcaacgatgcatagccgacctgagagggtgatcggccacactggaactgagacacggtccagactcctacgggaggcagcagtagggaatcttccgcaatgggcgaaagcctgacggagcaacgccgcgtgagtgatgaaggtcttcggatcgtaaaactctgttattagggaagaacatatgtgtaagtaactgtgcacatcttgacggtacctaatcagaaagccacggctaactacgtgccagcagccg…	Bacteria;Firmicutes;Bacilli;Bacillales;Staphylococcaceae;Staphylococcus;	k__Bacteria;p__Firmicutes;c__Bacilli;o__Bacillales;f__Staphylococcaceae;g__Staphylococcus;s__aureus;	Unclassified;	Bacteria;Firmicutes;Bacilli;Bacillales;Staphylococcaceae;Staphylococcus;	Bacteria;Firmicutes;Bacilli;Bacillales;Staphylococcaceae;Staphylococcus;
AF057_006	tataagactgggataacttcgggaaaccggagctaataccggataatatttcgaaccgcatggttcgatagtgaaagatggctttgctatcacttatagatggacctgcgccgtattagctagttggtaaggtaacggcttaccaaggcaacgatacgtagccgacctgagagggtgatcggccacactggaactgagacacggtccagactcctacgggaggcagcagtagggaatcttccgcaatgggcgaaagcctgacggagcaacgccgcgtgagtgatgaaggtcttcggatcgtaaaactctgttattagggaagaacaaacgtgtaagtaactgtgcacgtcttgacggtacctaatcagaaagccacggctaactacgtgccagcagccg…	Bacteria;	k__Bacteria;p__Firmicutes;c__Bacilli;o__Bacillales;f__Staphylococcaceae;g__Staphylococcus;	Unclassified;	Bacteria;Firmicutes;Bacilli;Bacillales;Staphylococcaceae;Staphylococcus;	Bacteria;Firmicutes;Bacilli;Bacillales;Staphylococcaceae;Staphylococcus;
AF057_007	tataagactgggataacttcgggaaaccggagctaataccggataatattttgaaccgcatggttcaaaagtgaaagacggtcttgctgtcacttatagatggatccgcgctgcattagctagttggtaaggtaacggcttaccaaggcaacgatgcatagccgacctgagagggtgatcggccacactggaactgagacacggtccagactcctacgggaggcagcagtagggaatcttccgcaatgggcgaaagcctgacggagcaacgccgcgtgagtgatgaaggtcttcggatcgtaaaactctgttattagggaagaacatatgtgtaagtaactgtgcacatcttgacggtacctaatcagaaagccacggctaactacgtgccagcagccg…	Bacteria;Firmicutes;Bacilli;Bacillales;Staphylococcaceae;Staphylococcus;	k__Bacteria;p__Firmicutes;c__Bacilli;o__Bacillales;f__Staphylococcaceae;g__Staphylococcus;s__aureus;	Unclassified;	Bacteria;Firmicutes;Bacilli;Bacillales;Staphylococcaceae;Staphylococcus;	Bacteria;Firmicutes;Bacilli;Bacillales;Staphylococcaceae;Staphylococcus;
AF057_008	tataagactgggataacttcgggaaaccggagctaataccggataatatttcgaaccgcatggttcgatagtgaaagatggctttgctatcacttatagatggacctgcgccgtattagctagttggtaaggtaacggcttaccaaggcaacgatacgtagccgacctgagagggtgatcggccacactggaactgagacacggtccagactcctacgggaggcagcagtagggaatcttccgcaatgggcgaaagcctgacggagcaacgccgcgtgagtgatgaaggtcttcggatcgtaaaactctgttattagggaagaacaaacgtgtaagtaactgtgcacgtcttgacggtacctaatcagaaagccacggctaactacgtgccagcagccg…	Bacteria;	k__Bacteria;p__Firmicutes;c__Bacilli;o__Bacillales;f__Staphylococcaceae;g__Staphylococcus;	Unclassified;	Bacteria;Firmicutes;Bacilli;Bacillales;Staphylococcaceae;Staphylococcus;	Bacteria;Firmicutes;Bacilli;Bacillales;Staphylococcaceae;Staphylococcus;
AF057_009	tataagactgggataacttcgggaaaccggagctaataccggataacatattgaaccgcatggttcaatagtgaaaggcggctttgctgtcacttatagatggatccgcgccgtattagctagttggtaaggtgacggcttaccaaggcaacgatacgtagccgacctgagagggtgatcggccacactggaactgagacacggtccagactcctacgggaggcagcagtagggaatcttccgcaatgggcgaaagcctgacggagcaacgccgcgtgagtgatgaaggtcttcggatcgtaaaactctgttatcagggaagaacaaatgtgtaagtaactgtgcacatcttgacggtacctgatcagaaagccacggctaactacgtgccagcagccg…	Bacteria;Firmicutes;Bacilli;Bacillales;Staphylococcaceae;Staphylococcus;	k__Bacteria;p__Firmicutes;c__Bacilli;o__Bacillales;f__Staphylococcaceae;g__Staphylococcus;	Unclassified;	Bacteria;Firmicutes;Bacilli;Bacillales;Staphylococcaceae;Staphylococcus;	Bacteria;Firmicutes;Bacilli;Bacillales;Staphylococcaceae;Staphylococcus;
AF058_001	tagtagtgggggatagctcggggaaactcgaattaataccgcatacgacctacgggtgaaagggggcgcaagctcttgctattagatgagcctaaatcagattagctagttggtggggtaaaggcccaccaaggcgacgatctgtaactggtctgagaggatgatcagtcacaccggaactgagacacggtccggactcctacgggaggcagcagtggggaatattggacaatgggggcaaccctgatccagccatgccgcgtgtgtgaagaaggccttttggttgtaaagcactttaagcagggaggagaggctaatggttaatacccattagattagacgttacctgcagaataagcaccggctaactctgtgccagcagccgcggtaatacagagg…	Unclassified;	Unclassified;	Unclassified;	Bacteria;"Proteobacteria";Gammaproteobacteria;Pseudomonadales;Moraxellaceae;Enhydrobacter;	Bacteria;Proteobacteria;Gammaproteobacteria;Pseudomonadales;Moraxellaceae;Enhydrobacter;
AF058_002	cttaactctgggataagcctgggaaactgggtctaataccggataggagcgcctaccgcatggtgggtgttggaaagatttatcggttttggatggactcgcggcctatcagcttgttggtgaggtaatggctcaccaaggcgacgacgggtagccggcctgagagggtgaccggccacactgggactgagacacggcccagactcctacgggaggcagcagtggggaatattgcacaatgggcgcaagcctgatgcagcgacgccgcgtgagggatgacggccttcgggttgtaaacctctttcagtagggaagaagcgaaagtgacggtacctgcagaagaagcaccggctaactacgtgccagcagccgcggtaatacgtagggtgcgagcgttat…	Bacteria;Actinobacteria;Micrococcales;Micrococcaceae;Micrococcus;	k__Bacteria;p__Actinobacteria;c__Actinobacteria;o__Actinomycetales;f__Micrococcaceae;g__Micrococcus;s__luteus;	Unclassified;	Bacteria;"Actinobacteria";Actinobacteria;Actinobacteridae;Actinomycetales;Micrococcineae;Micrococcaceae;Micrococcus;	Bacteria;Actinobacteria;Actinobacteria;Micrococcales;Micrococcaceae;Micrococcus;
AF058_003	cttaactctgggataagcctgggaaactgggtctaataccggatatgactcctcatcgcatggtggggggtggaaagctttattgtggttttggatggactcgcggcctatcagcttgttggtgaggtaatggcttaccaaggcgacgacgggtagccggcctgagagggtgaccggccacactgggactgagacacggcccagactcctacgggaggcagcagtggggaatattgcacaatgggcgcaagcctgatgcagcgacgccgcgtgagggatgacggccttcgggttgtaaacctctttcagtagggaagaagcgaaagtgacggtacctgcagaagaagcgccggctaactacgtgccagcagccgcggtaatacgtagggcgcaagcgtt…	Bacteria;Actinobacteria;Micrococcales;Micrococcaceae;	k__Bacteria;p__Actinobacteria;c__Actinobacteria;o__Actinomycetales;f__Micrococcaceae;	Unclassified;	Bacteria;"Actinobacteria";Actinobacteria;Actinobacteridae;Actinomycetales;Micrococcineae;Micrococcaceae;Arthrobacter;	Bacteria;Actinobacteria;Actinobacteria;Micrococcales;Micrococcaceae;Pseudarthrobacter;
AF058_004	tagtagtgggggacaacgtttcgaaaggaacgctaataccgcatacgtcctacgggagaaagtgggggatcttcggacctcacgctattagatgagcctaggtcggattagctagttggtagggtaaaggcctaccaaggcgacgatccgtaactggtctgagaggatgatcagtcacactggaactgagacacggtccagactcctacgggaggcagcagtggggaatattggacaatgggcgaaagcctgatccagccatgccgcgtgtgtgaagaaggccttcgggtcgtaaagcactttaagttgggaggaagggctcatagcgaatacctgtgagttttgacgttaccaacagaataagcaccggctaacttcgtgccagcagccgcggtaata…	Unclassified;	k__Bacteria;p__Proteobacteria;c__Gammaproteobacteria;o__Pseudomonadales;f__Pseudomonadaceae;g__Pseudomonas;	Unclassified;	Bacteria;"Proteobacteria";Gammaproteobacteria;Pseudomonadales;Pseudomonadaceae;Pseudomonas;	Bacteria;Proteobacteria;Gammaproteobacteria;Pseudomonadales;Pseudomonadaceae;Pseudomonas;
AF058_005	cttaactctgggataagcctgggaaactgggtctaataccggataggagcgtccaccgcatggtgggtgttggaaagatttatcggttttggatggactcgcggcctatcagcttgttggtgaggtaatggctcaccaaggcgacgacgggtagccggcctgagagggtgaccggccacactgggactgagacacggcccagactcctacgggaggcagcagtggggaatattgcacaatgggcgcaagcctgatgcagcgacgccgcgtgagggatgacggccttcgggttgtaaacctctttcagtagggaagaagcgaaagtgacggtacctgcagaagaagcaccggctaactacgtgccagcagccgcggtaatacgtagggtgcgagcgttat…	Bacteria;Actinobacteria;Micrococcales;Micrococcaceae;Micrococcus;	k__Bacteria;p__Actinobacteria;c__Actinobacteria;o__Actinomycetales;f__Micrococcaceae;g__Micrococcus;s__luteus;	Unclassified;	Bacteria;"Actinobacteria";Actinobacteria;Actinobacteridae;Actinomycetales;Micrococcineae;Micrococcaceae;Micrococcus;	Bacteria;Actinobacteria;Actinobacteria;Micrococcales;Micrococcaceae;Micrococcus;
AF058_007	tataagactgggataacttcgggaaaccggagctaataccggataatatattgaaccgcatggttcaatagtgaaagacggttttgctgtcacttatagatggatccgcgccgcattagctagttggtaaggtaacggcttaccaaggcaacgatgcgtagccgacctgagagggtgatcggccacactggaactgagacacggtccagactcctacgggaggcagcagtagggaatcttccgcaatgggcgaaagcctgacggagcaacgccgcgtgagtgatgaaggtcttcggatcgtaaaactctgttattagggaagaacaaatgtgtaagtaactatgcacgtcttgacggtacctaatcagaaagccacggctaactacgtgccagcagccg…	Bacteria;	k__Bacteria;p__Firmicutes;c__Bacilli;o__Bacillales;f__Staphylococcaceae;g__Staphylococcus;s__epidermidis;	Unclassified;	Bacteria;Firmicutes;Bacilli;Bacillales;Staphylococcaceae;Staphylococcus;	Bacteria;Firmicutes;Bacilli;Bacillales;Staphylococcaceae;Staphylococcus;
AF058_008	tataagactggaataacttcgggaaaccgaagctaatgccggataacatgtagaaccgcatggttctacagtgaaagatggccttgctatcacttatagatggacccgcgccgtattagctagttggtaaggtaacggcttaccaaggcaacgatacgtagccgacctgagagggtgatcggccacactggaactgagacacggtccagactcctacgggaggcagcagtagggaatcttccgcaatgggcgaaagcctgacggagcaacgccgcgtgagtgatgaaggtcttcggatcgtaaagctctgttattagggaagaacaagtgcgtaagtaactgtgcgcaccttgacggtacctaatcagaaagccacggctaactacgtgccagcagccg…	Bacteria;Firmicutes;Bacilli;Bacillales;Staphylococcaceae;Staphylococcus;	k__Bacteria;p__Firmicutes;c__Bacilli;o__Bacillales;f__Staphylococcaceae;g__Staphylococcus;	Unclassified;	Bacteria;Firmicutes;Bacilli;Bacillales;Staphylococcaceae;Staphylococcus;	Bacteria;Firmicutes;Bacilli;Bacillales;Staphylococcaceae;Staphylococcus;
AF058_009	cttaactctgggataagcctgggaaactgggtctaataccggataggagcgcctaccgcatggtgggtgttggaaagatttatcggttttggatggactcgcggcctatcagcttgttggtgaggtaatggctcaccaaggcgacgacgggtagccggcctgagagggtgaccggccacactgggactgagacacggcccagactcctacgggaggcagcagtggggaatattgcacaatgggcgcaagcctgatgcagcgacgccgcgtgagggatgacggccttcgggttgtaaacctctttcagtagggaagaagcgaaagtgacggtacctgcagaagaagcaccggctaactacgtgccagcagccgcggtaatacgtagggtgcgagcgttat…	Bacteria;Actinobacteria;Micrococcales;Micrococcaceae;Micrococcus;	k__Bacteria;p__Actinobacteria;c__Actinobacteria;o__Actinomycetales;f__Micrococcaceae;g__Micrococcus;s__luteus;	Unclassified;	Bacteria;"Actinobacteria";Actinobacteria;Actinobacteridae;Actinomycetales;Micrococcineae;Micrococcaceae;Micrococcus;	Bacteria;Actinobacteria;Actinobacteria;Micrococcales;Micrococcaceae;Micrococcus;
AF058_010	cttaactctgggataagcctgggaaactgggtctaataccggataggagcgcctaccgcatggtgggtgttggaaagatttatcggttttggatggactcgcggcctatcagcttgttggtgaggtaatggctcaccaaggcgacgacgggtagccggcctgagagggtgaccggccacactgggactgagacacggcccagactcctacgggaggcagcagtggggaatattgcacaatgggcgcaagcctgatgcagcgacgccgcgtgagggatgacggccttcgggttgtaaacctctttcagtagggaagaagcgaaagtgacggtacctgcagaagaagcaccggctaactacgtgccagcagccgcggtaatacgtagggtgcgagcgttat…	Bacteria;Actinobacteria;Micrococcales;Micrococcaceae;Micrococcus;	k__Bacteria;p__Actinobacteria;c__Actinobacteria;o__Actinomycetales;f__Micrococcaceae;g__Micrococcus;s__luteus;	Unclassified;	Bacteria;"Actinobacteria";Actinobacteria;Actinobacteridae;Actinomycetales;Micrococcineae;Micrococcaceae;Micrococcus;	Bacteria;Actinobacteria;Actinobacteria;Micrococcales;Micrococcaceae;Micrococcus;
AF058_013	cctgactctgggataagcctgagaaattgggtctaatactggatatgaacatttgccgcatggtgggtgttggaaagattttttggttggggatggactcgcggcctatcagcttgttggtgaggtagtggctcaccaaggcgacgacgggtagccggcctgagagggtgaccggccacactgggactgagacacggcccagactcctacgggaggcagcagtggggaatattgcacaatgggcgaaagcctgatgcagcgacgccgcgtgagggatgacggccttcgggttgtaaacctctttcagtaaggaagaagcgaaagtgacggtacttgcagaagaagcgccggctaactacgtgccagcagccgcggtaatacgtagggcgcgagcgttat…	Bacteria;	k__Bacteria;p__Actinobacteria;c__Actinobacteria;o__Actinomycetales;f__Micrococcaceae;	Bacteria;Actinobacteria;Actinobacteria;Micrococcales;Micrococcaceae;Neomicrococcus;	Bacteria;"Actinobacteria";Actinobacteria;Actinobacteridae;Actinomycetales;Micrococcineae;Micrococcaceae;	Bacteria;Actinobacteria;Actinobacteria;Micrococcales;Micrococcaceae;Neomicrococcus;
AF059_001	tataagactgggataacttcgggaaaccggagctaataccggataatatattgaaccgcatggttcaatagtgaaagacggttttgctgtcacttatagatggatccgcgccgcattagctagttggtaaggtaacggcttaccaaggcaacgatgcgtagccgacctgagagggtgatcggccacactggaactgagacacggtccagactcctacgggaggcagcagtagggaatcttccgcaatgggcgaaagcctgacggagcaacgccgcgtgagtgatgaaggtcttcggatcgtaaaactctgttattagggaagaacaaatgtgtaagtaactatgcacgtcttgacggtacctaatcagaaagccacggctaactacgtgccagcagccg…	Bacteria;	k__Bacteria;p__Firmicutes;c__Bacilli;o__Bacillales;f__Staphylococcaceae;g__Staphylococcus;s__epidermidis;	Unclassified;	Bacteria;Firmicutes;Bacilli;Bacillales;Staphylococcaceae;Staphylococcus;	Bacteria;Firmicutes;Bacilli;Bacillales;Staphylococcaceae;Staphylococcus;
AF059_002	tataagactgggataacttcgggaaaccggagctaataccggataatatattgaaccgcatggttcaatagtgaaagacggttttgctgtcacttatagatggatccgcgccgcattagctagttggtaaggtaacggcttaccaaggcaacgatgcgtagccgacctgagagggtgatcggccacactggaactgagacacggtccagactcctacgggaggcagcagtagggaatcttccgcaatgggcgaaagcctgacggagcaacgccgcgtgagtgatgaaggtcttcggatcgtaaaactctgttattagggaagaacaaatgtgtaagtaactatgcacgtcttgacggtacctaatcagaaagccacggctaactacgtgccagcagccg…	Bacteria;Firmicutes;Bacilli;Bacillales;Staphylococcaceae;Staphylococcus;	k__Bacteria;p__Firmicutes;c__Bacilli;o__Bacillales;f__Staphylococcaceae;g__Staphylococcus;s__epidermidis;	Unclassified;	Bacteria;Firmicutes;Bacilli;Bacillales;Staphylococcaceae;Staphylococcus;	Bacteria;Firmicutes;Bacilli;Bacillales;Staphylococcaceae;Staphylococcus;
AF059_003	tataagactgggataacttcgggaaaccggagctaataccggataacatgttgaaccgcatggttcaacagtgaaagacggtcttgctgtcacttatagatggatccgcgccgcattagctagttggtaaggtaacggcttaccaaggcaacgatgcgtagccgacctgagagggtgatcggccacactggaactgagacacggtccagactcctacgggaggcagcagtagggaatcttccgcaatgggcgaaagcctgacggagcaacgccgcgtgagtgaagaaggtcttcggatcgtaaaactctgttattagggaagaacaaatgtgtaagtaactatgcacgtcttgacggtacctaatcagaaagccacggctaactacgtgccagcagccg…	Bacteria;	k__Bacteria;p__Firmicutes;c__Bacilli;o__Bacillales;f__Staphylococcaceae;g__Staphylococcus;	Unclassified;	Bacteria;Firmicutes;Bacilli;Bacillales;Staphylococcaceae;Staphylococcus;	Bacteria;Firmicutes;Bacilli;Bacillales;Staphylococcaceae;Staphylococcus;
AF059_004	tataagactgggataacttcgggaaaccggagctaataccggataacatgttgaaccgcatggttcaacagtgaaagacggtcttgctgtcacttatagatggatccgcgccgcattagctagttggtaaggtaacggcttaccaaggcaacgatgcgtagccgacctgagagggtgatcggccacactggaactgagacacggtccagactcctacgggaggcagcagtagggaatcttccgcaatgggcgaaagcctgacggagcaacgccgcgtgagtgaagaaggtcttcggatcgtaaaactctgttattagggaagaacaaatgtgtaagtaactatgcacgtcttgacggtacctaatcagaaagccacggctaactacgtgccagcagccg…	Bacteria;	k__Bacteria;p__Firmicutes;c__Bacilli;o__Bacillales;f__Staphylococcaceae;g__Staphylococcus;	Unclassified;	Bacteria;Firmicutes;Bacilli;Bacillales;Staphylococcaceae;Staphylococcus;	Bacteria;Firmicutes;Bacilli;Bacillales;Staphylococcaceae;Staphylococcus;
AF059_005	tataagactgggataacttcgggaaaccggagctaataccggataatatattgaaccgcatggttcaatagtgaaagacggttttgctgtcacttatagatggatccgcgccgcattagctagttggtaaggtaacggcttaccaaggcaacgatgcgtagccgacctgagagggtgatcggccacactggaactgagacacggtccagactcctacgggaggcagcagtagggaatcttccgcaatgggcgaaagcctgacggagcaacgccgcgtgagtgatgaaggtcttcggatcgtaaaactctgttattagggaagaacaaatgtgtaagtaactatgcacgtcttgacggtacctaatcagaaagccacggctaactacgtgccagcagccg…	Bacteria;Firmicutes;Bacilli;Bacillales;Staphylococcaceae;Staphylococcus;	k__Bacteria;p__Firmicutes;c__Bacilli;o__Bacillales;f__Staphylococcaceae;g__Staphylococcus;s__epidermidis;	Unclassified;	Bacteria;Firmicutes;Bacilli;Bacillales;Staphylococcaceae;Staphylococcus;	Bacteria;Firmicutes;Bacilli;Bacillales;Staphylococcaceae;Staphylococcus;
AF059_006	cttctctacggaatagtcctgggaaactgggggtaataccgtatacgccctttgggggaaagatttatcggggaaggattagcccgcgttggattaggtagttggtggggtaatggcctaccaagccgacgatccatagctggtttgagaggatgatcagccacactgggactgagacacggcccagactcctacgggaggcagcagtggggaatcttagacaatgggggcaaccctgatctagccatgccgcgtgagtgatgaaggccttagggttgtaaagctctttcagctgggaagataatgacggtaccagcagaagaagccccggctaactccgtgccagcagccgcggtaatacggagggggctagcgttgttcggaattactgggcgtaaa…	Bacteria;	Unclassified;	Unclassified;	Bacteria;"Proteobacteria";Alphaproteobacteria;Rhodobacterales;Rhodobacteraceae;Paracoccus;	Bacteria;Proteobacteria;Alphaproteobacteria;Rhodobacterales;Rhodobacteraceae;Paracoccus;
AF060_002	ctgcacttcgggataagcctgggaaactgggtctaataccggatattcagcttctgccgcatggtgggggttggaaagtttttcggtgcaggatgagcccgcggcctatcagcttgttggtggggtaatggcctaccaaggcgacgacgggtagccggcctgagagggtgatcggccacactgggactgagacacggcccagactcctacgggaggcagcagtggggaatattgcacaatgggcgaaagcctgatgcagcgacgccgcgtgggggatgacggtcttcggattgtaaacccctttcagtagggacgaagcgcaagtgacggtacctgcagaagaagcaccggccaactacgtgccagcagccgcggtaatacgtagggtgcgagcgttgt…	Bacteria;environmental samples;	k__Bacteria;p__Actinobacteria;c__Actinobacteria;o__Actinomycetales;f__Dietziaceae;g__Dietzia;	Unclassified;	Bacteria;"Actinobacteria";Actinobacteria;Actinobacteridae;Actinomycetales;Corynebacterineae;Dietziaceae;Dietzia;	Bacteria;Actinobacteria;Actinobacteria;Corynebacteriales;Dietziaceae;Dietzia;
AF060_003	cttaactctgggataagcctgggaaactgggtctaataccggataggagcgcctaccgcatggtgggtgttggaaagatttatcggttttggatggactcgcggcctatcagcttgttggtgaggtaatggctcaccaaggcgacgacgggtagccggcctgagagggtgaccggccacactgggactgagacacggcccagactcctacgggaggcagcagtggggaatattgcacaatgggcgaaagcctgatgcagcgacgccgcgtgagggatgacggccttcgggttgtaaacctctttcagtagggaagaagcgaaagtgacggtacctgcagaagaagcaccggctaactacgtgccagcagccgcggtaatacgtagggtgcgagcgttat…	Bacteria;Actinobacteria;Micrococcales;Micrococcaceae;	k__Bacteria;p__Actinobacteria;c__Actinobacteria;o__Actinomycetales;f__Micrococcaceae;g__Micrococcus;s__luteus;	Unclassified;	Bacteria;"Actinobacteria";Actinobacteria;Actinobacteridae;Actinomycetales;Micrococcineae;Micrococcaceae;Micrococcus;	Bacteria;Actinobacteria;Actinobacteria;Micrococcales;Micrococcaceae;Micrococcus;
AF060_004	cttaactctgggataagcctgggaaactgggtctaataccggataggagcgcctaccgcatggtgggtgttggaaagatttatcggttttggatggactcgcggcctatcagcttgttggtgaggtaatggctcaccaaggcgacgacgggtagccggcctgagagggtgaccggccacactgggactgagacacggcccagactcctacgggaggcagcagtggggaatattgcacaatgggcgaaagcctgatgcagcgacgccgcgtgagggatgacggccttcgggttgtaaacctctttcagtagggaagaagcgaaagtgacggtacctgcagaagaagcaccggctaactacgtgccagcagccgcggtaatacgtagggtgcgagcgttat…	Bacteria;Actinobacteria;Micrococcales;Micrococcaceae;	k__Bacteria;p__Actinobacteria;c__Actinobacteria;o__Actinomycetales;f__Micrococcaceae;g__Micrococcus;s__luteus;	Unclassified;	Bacteria;"Actinobacteria";Actinobacteria;Actinobacteridae;Actinomycetales;Micrococcineae;Micrococcaceae;Micrococcus;	Bacteria;Actinobacteria;Actinobacteria;Micrococcales;Micrococcaceae;Micrococcus;
AF060_005	tataagactgggataacttcgggaaaccggagctaataccggataatatattgaaccgcatggttcaatagtgaaagacggttttgctgtcacttatagatggatccgcgccgcattagctagttggtaaggtaacggcttaccaaggcaacgatgcgtagccgacctgagagggtgatcggccacactggaactgagacacggtccagactcctacgggaggcagcagtagggaatcttccgcaatgggcgaaagcctgacggagcaacgccgcgtgagtgatgaaggtcttcggatcgtaaaactctgttattagggaagaacaaatgtgtaagtaactatgcacgtcttgacggtacctaatcagaaagccacggctaactacgtgccagcagccg…	Bacteria;Firmicutes;Bacilli;Bacillales;Staphylococcaceae;Staphylococcus;	k__Bacteria;p__Firmicutes;c__Bacilli;o__Bacillales;f__Staphylococcaceae;g__Staphylococcus;s__epidermidis;	Unclassified;	Bacteria;Firmicutes;Bacilli;Bacillales;Staphylococcaceae;Staphylococcus;	Bacteria;Firmicutes;Bacilli;Bacillales;Staphylococcaceae;Staphylococcus;
AF060_006	tataagactgggataacttcgggaaaccggagctaataccggataatatattgaaccgcatggttcaatagtgaaagacggttttgctgtcacttatagatggatccgcgccgcattagctagttggtaaggtaacggcttaccaaggcaacgatgcgtagccgacctgagagggtgatcggccacactggaactgagacacggtccagactcctacgggaggcagcagtagggaatcttccgcaatgggcgaaagcctgacggagcaacgccgcgtgagtgatgaaggtcttcggatcgtaaaactctgttattagggaagaacaaatgtgtaagtaactatgcacgtcttgacggtacctaatcagaaagccacggctaactacgtgccagcagccg…	Bacteria;Firmicutes;Bacilli;Bacillales;Staphylococcaceae;Staphylococcus;	k__Bacteria;p__Firmicutes;c__Bacilli;o__Bacillales;f__Staphylococcaceae;g__Staphylococcus;s__epidermidis;	Unclassified;	Bacteria;Firmicutes;Bacilli;Bacillales;Staphylococcaceae;Staphylococcus;	Bacteria;Firmicutes;Bacilli;Bacillales;Staphylococcaceae;Staphylococcus;
AF060_007	cttaactctgggataagcctgggaaactgggtctaataccggataggagcgtccaccgcatggtgggtgttggaaagatttatcggttttggatggactcgcggcctatcagcttgttggtgaggtaatggctcaccaaggcgacgacgggtagccggcctgagagggtgaccggccacactgggactgagacacggcccagactcctacgggaggcagcagtggggaatattgcacaatgggcgcaagcctgatgcagcgacgccgcgtgagggatgacggccttcgggttgtaaacctctttcagtagggaagaagcgaaagtgacggtacctgcagaagaagcaccggctaactacgtgccagcagccgcggtaatacgtagggtgcgagcgttat…	Bacteria;Actinobacteria;Micrococcales;Micrococcaceae;Micrococcus;	k__Bacteria;p__Actinobacteria;c__Actinobacteria;o__Actinomycetales;f__Micrococcaceae;g__Micrococcus;s__luteus;	Unclassified;	Bacteria;"Actinobacteria";Actinobacteria;Actinobacteridae;Actinomycetales;Micrococcineae;Micrococcaceae;Micrococcus;	Bacteria;Actinobacteria;Actinobacteria;Micrococcales;Micrococcaceae;Micrococcus;
AF060_008	tataagactgggataacttcgggaaaccggagctaataccggataatatattgaaccgcatggttcaatagtgaaagacggttttgctgtcacttatagatggatccgcgccgcattagctagttggtaaggtaacggcttaccaaggcaacgatgcgtagccgacctgagagggtgatcggccacactggaactgagacacggtccagactcctacgggaggcagcagtagggaatcttccgcaatgggcgaaagcctgacggagcaacgccgcgtgagtgatgaaggtcttcggatcgtaaaactctgttattagggaagaacaaatgtgtaagtaactatgcacgtcttgacggtacctaatcagaaagccacggctaactacgtgccagcagccg…	Bacteria;	k__Bacteria;p__Firmicutes;c__Bacilli;o__Bacillales;f__Staphylococcaceae;g__Staphylococcus;s__epidermidis;	Unclassified;	Bacteria;Firmicutes;Bacilli;Bacillales;Staphylococcaceae;Staphylococcus;	Bacteria;Firmicutes;Bacilli;Bacillales;Staphylococcaceae;Staphylococcus;
AF060_010	cttgactctgggataagcccgggaaactgggtctaatactggatgctacatgtcaccgcatggtggtgtgtggaaagggtttactggtcttggatgggctcacggcctatcagcttgttggtgaggtaatggctcaccaaggcgacgacgggtagccggcctgagagggtgaccggccacactgggactgagacacggcccagactcctacgggaggcagcagtggggaatattgcacaatgggcgaaagcctgatgcagcgacgccgcgtgagggatgacggccttcgggttgtaaacctctttcagcagggaagaagccacaagtgacggtacctgcagaagaagcgccggctaactacgtgccagcagccgcggtaatacgtagggcgcaagcgtt…	Bacteria;	k__Bacteria;p__Actinobacteria;c__Actinobacteria;o__Actinomycetales;f__Micrococcaceae;g__Kocuria;s__palustris;	Unclassified;	Bacteria;"Actinobacteria";Actinobacteria;Actinobacteridae;Actinomycetales;Micrococcineae;Micrococcaceae;Kocuria;	Bacteria;Actinobacteria;Actinobacteria;Micrococcales;Micrococcaceae;Kocuria;
AF060_011	cttaactctgggataagcctgggaaactgggtctaataccggataggagcgcctaccgcatggtgggtgttggaaagatttatcggttttggatggactcgcggcctatcagcttgttggtgaggtaatggctcaccaaggcgacgacgggtagccggcctgagagggtgaccggccacactgggactgagacacggcccagactcctacgggaggcagcagtggggaatattgcacaatgggcgcaagcctgatgcagcgacgccgcgtgagggatgacggccttcgggttgtaaacctctttcagtagggaagaagcgaaagtgacggtacctgcagaagaagcaccggctaactacgtgccagcagccgcggtaatacgtagggtgcgagcgttat…	Bacteria;Actinobacteria;Micrococcales;Micrococcaceae;Micrococcus;	k__Bacteria;p__Actinobacteria;c__Actinobacteria;o__Actinomycetales;f__Micrococcaceae;g__Micrococcus;s__luteus;	Unclassified;	Bacteria;"Actinobacteria";Actinobacteria;Actinobacteridae;Actinomycetales;Micrococcineae;Micrococcaceae;Micrococcus;	Bacteria;Actinobacteria;Actinobacteria;Micrococcales;Micrococcaceae;Micrococcus;
AF060_012	cttaactctgggataagcctgggaaactgggtctaataccggataggagcgtccaccgcatggtgggtgttggaaagatttatcggttttggatggactcgcggcctatcagcttgttggtgaggtaatggctcaccaaggcgacgacgggtagccggcctgagagggtgaccggccacactgggactgagacacggcccagactcctacgggaggcagcagtggggaatattgcacaatgggcgcaagcctgatgcagcgacgccgcgtgagggatgacggccttcgggttgtaaacctctttcagtagggaagaagcgaaagtgacggtacctgcagaagaagcaccggctaactacgtgccagcagccgcggtaatacgtagggtgcgagcgttat…	Bacteria;Actinobacteria;Micrococcales;Micrococcaceae;Micrococcus;	k__Bacteria;p__Actinobacteria;c__Actinobacteria;o__Actinomycetales;f__Micrococcaceae;g__Micrococcus;s__luteus;	Unclassified;	Bacteria;"Actinobacteria";Actinobacteria;Actinobacteridae;Actinomycetales;Micrococcineae;Micrococcaceae;Micrococcus;	Bacteria;Actinobacteria;Actinobacteria;Micrococcales;Micrococcaceae;Micrococcus;
AF060_013	cttaactctgggataagcctgggaaactaggtctaataccggataggagcgcctaccgcatggtgggtgttggaaagatttatcggttttggatggactcgcggcctatcagcttgttggtgaggtaatggctcaccaaggcgacgacgggtagccggcctgagagggtgaccggccacactgggactgagacacggcccagactcctacgggaggcagcagtggggaatattgcacaatgggcgcaagcctgatgcagcgacgccgcgtgagggatgacggccttcgggttgtaaacctctttcagtagggaagaagcgaaagtgacggtacctgcagaagaagcaccggctaactacgtgccagcagccgcggtaatacgtagggtgcgagcgttat…	Bacteria;Actinobacteria;Micrococcales;Micrococcaceae;Micrococcus;	k__Bacteria;p__Actinobacteria;c__Actinobacteria;o__Actinomycetales;f__Micrococcaceae;g__Micrococcus;s__luteus;	Unclassified;	Bacteria;"Actinobacteria";Actinobacteria;Actinobacteridae;Actinomycetales;Micrococcineae;Micrococcaceae;Micrococcus;	Bacteria;Actinobacteria;Actinobacteria;Micrococcales;Micrococcaceae;Micrococcus;
AF060_101	cataagactgggataactccgggaaaccggggctaataccggataacattttgaaccgcatggttcgaaattgaaaggcggcttcggctgtcacttatggatggacccgcgtcgcattagctagttggtgaggtaacggctcaccaaggcaacgatgcgtagccgacctgagagggtgatcggccacactgggactgagacacggcccagactcctacgggaggcagcagtagggaatcttccgcaatggacgaaagtctgacggagcaacgccgcgtgagtgatgaaggctttcgggtcgtaaaactctgttgttagggaagaacaagtgctagttgaataagctggcaccttgacggtacctaaccagaaagccacggctaactacgtgccagcagc…	Bacteria;	k__Bacteria;p__Firmicutes;c__Bacilli;o__Bacillales;f__Bacillaceae;	Unclassified;	Bacteria;Firmicutes;Bacilli;Bacillales;Bacillaceae 1;Bacillus;	Bacteria;Firmicutes;Bacilli;Bacillales;Bacillaceae;Bacillus;
AF060_103	cttaactctgggataagcctgggaaactgggtctaataccggataggagcgcctaccgcatggtgggtgttggaaagatttatcggttttggatggactcgcggcctatcagcttgttggtgaggtaatggctcaccaaggcgacgacgggtagccggcctgagagggtgaccggccacactgggactgagacacggcccagactcctacgggaggcagcagtggggaatattgcacaatgggcgcaagcctgatgcagcgacgccgcgtgagggatgacggccttcgggttgtaaacctctttcagtagggaagaagcgaaagtgacggtacctgcagaagaagcaccggctaactacgtgccagcagccgcggtaatacgtagggtgcgagcgttat…	Bacteria;Actinobacteria;Micrococcales;Micrococcaceae;Micrococcus;	k__Bacteria;p__Actinobacteria;c__Actinobacteria;o__Actinomycetales;f__Micrococcaceae;g__Micrococcus;s__luteus;	Unclassified;	Bacteria;"Actinobacteria";Actinobacteria;Actinobacteridae;Actinomycetales;Micrococcineae;Micrococcaceae;Micrococcus;	Bacteria;Actinobacteria;Actinobacteria;Micrococcales;Micrococcaceae;Micrococcus;
AF060_104	tataagactgggataacttcgggaaaccggagctaataccggataatatattgaaccgcatggttcaatagtgaaagacggttttgctgtcacttatagatggatccgcgccgcattagctagttggtaaggtaacggcttaccaaggcaacgatgcgtagccgacctgagagggtgatcggccacactggaactgagacacggtccagactcctacgggaggcagcagtagggaatcttccgcaatgggcgaaagcctgacggagcaacgccgcgtgagtgatgaaggtcttcggatcgtaaaactctgttattagggaagaacaaatgtgtaagtaactatgcacgtcttgacggtacctaatcagaaagccacggctaactacgtgccagcagccg…	Bacteria;	k__Bacteria;p__Firmicutes;c__Bacilli;o__Bacillales;f__Staphylococcaceae;g__Staphylococcus;s__epidermidis;	Unclassified;	Bacteria;Firmicutes;Bacilli;Bacillales;Staphylococcaceae;Staphylococcus;	Bacteria;Firmicutes;Bacilli;Bacillales;Staphylococcaceae;Staphylococcus;
AF060_105	tataagactgggataacttcgggaaaccggagctaataccggataacatattgaaccgcatggttcaatagtgaaaggcggctttgctgtcacttatagatggatccgcgccgtattagctagttggtaaggtaacggcttaccaaggcaacgatacgtagccgacctgagagggtgatcggccacactggaactgagacacggtccagactcctacgggaggcagcagtagggaatcttccgcaatgggcgaaagcctgacggagcaacgccgcgtgagtgatgaaggtcttcggatcgtaaaactctgttatcagggaagaacaaatgtgtaagtaactgtgcacatcttgacggtacctgatcagaaagccacggctaactacgtgccagcagccg…	Bacteria;Firmicutes;Bacilli;Bacillales;Staphylococcaceae;Staphylococcus;	k__Bacteria;p__Firmicutes;c__Bacilli;o__Bacillales;f__Staphylococcaceae;g__Staphylococcus;	Unclassified;	Bacteria;Firmicutes;Bacilli;Bacillales;Staphylococcaceae;Staphylococcus;	Bacteria;Firmicutes;Bacilli;Bacillales;Staphylococcaceae;Staphylococcus;
AF060_106	cataagactgggataactccgggaaaccggggctaataccggataacattttgaaccgcatggttcgaaattgaaaggcggcttcggctgtcacttatggatggacccgcgtcgcattagctagttggtgaggtaacggctcaccaaggcaacgatgcgtagccgacctgagagggtgatcggccacactgggactgagacacggcccagactcctacgggaggcagcagtagggaatcttccgcaatggacgaaagtctgacggagcaacgccgcgtgagtgatgaaggctttcgggtcgtaaaactctgttgttagggaagaacaagtgctagttgaataagctggcaccttgacggtacctaaccagaaagccacggctaactacgtgccagcagc…	Bacteria;Firmicutes;Bacilli;Bacillales;Bacillaceae;Bacillus;	k__Bacteria;p__Firmicutes;c__Bacilli;o__Bacillales;f__Bacillaceae;	Unclassified;	Bacteria;Firmicutes;Bacilli;Bacillales;Bacillaceae 1;Bacillus;	Bacteria;Firmicutes;Bacilli;Bacillales;Bacillaceae;Bacillus;
AF060_107	tataagactgggataacttcgggaaaccggagctaataccggataatatattgaaccgcatggttcaatagtgaaagacggttttgctgtcacttatagatggatccgcgccgcattagctagttggtaaggtaacggcttaccaaggcaacgatgcgtagccgacctgagagggtgatcggccacactggaactgagacacggtccagactcctacgggaggcagcagtagggaatcttccgcaatgggcgaaagcctgacggagcaacgccgcgtgagtgatgaaggtcttcggatcgtaaaactctgttattagggaagaacaaatgtgtaagtaactatgcacgtcttgacggtacctaatcagaaagccacggctaactacgtgccagcagccg…	Bacteria;	k__Bacteria;p__Firmicutes;c__Bacilli;o__Bacillales;f__Staphylococcaceae;g__Staphylococcus;s__epidermidis;	Unclassified;	Bacteria;Firmicutes;Bacilli;Bacillales;Staphylococcaceae;Staphylococcus;	Bacteria;Firmicutes;Bacilli;Bacillales;Staphylococcaceae;Staphylococcus;
AF060_201	cttgactttgggataacttcaggaaactggggctaataccggataggagctcctgctgcatggtgggggttggaaagtttcggcggttggggatggactcgcggcttatcagcttgttggtggggtagtggcttaccaaggctttgacgggtagccggcctgagagggtgaccggccacattgggactgagatacggcccagactcctacgggaggcagcagtggggaatattgcacaatgggcggaagcctgatgcagcaacgccgcgtgcgggatgacggccttcgggttgtaaaccgctttcgcctgtgacgaagcgtgagtgacggtaatgggtaaagaagcaccggctaactacgtgccagcagccgcggtgatacgtagggtgcgagcgttgt…	Bacteria;	k__Bacteria;p__Actinobacteria;c__Actinobacteria;o__Actinomycetales;f__Propionibacteriaceae;g__Propionibacterium;s__acnes;	Unclassified;	Bacteria;"Actinobacteria";Actinobacteria;Actinobacteridae;Actinomycetales;Propionibacterineae;Propionibacteriaceae;Propionibacterium;	Bacteria;Actinobacteria;Actinobacteria;Propionibacteriales;Propionibacteriaceae;Cutibacterium;
AF060_203	tataagactgggataacttcgggaaaccggagctaataccggataatatattgaaccgcatggttcaatagtgaaagacggttttgctgtcacttatagatggatccgcgccgcattagctagttggtaaggtaacggcttaccaaggcaacgatgcgtagccgacctgagagggtgatcggccacactggaactgagacacggtccagactcctacgggaggcagcagtagggaatcttccgcaatgggcgaaagcctgacggagcaacgccgcgtgagtgatgaaggtcttcggatcgtaaaactctgttattagggaagaacaaatgtgtaagtaactatgcacgtcttgacggtacctaatcagaaagccacggctaactacgtgccagcagccg…	Bacteria;	k__Bacteria;p__Firmicutes;c__Bacilli;o__Bacillales;f__Staphylococcaceae;g__Staphylococcus;s__epidermidis;	Unclassified;	Bacteria;Firmicutes;Bacilli;Bacillales;Staphylococcaceae;Staphylococcus;	Bacteria;Firmicutes;Bacilli;Bacillales;Staphylococcaceae;Staphylococcus;
AF060_204	cttgactttgggataacttcaggaaactggggctaataccggataggagctcctgctgcatggtgggggttggaaagtttcggcggttggggatggactcgcggcttatcagcttgttggtggggtagtggcttaccaaggctttgacgggtagccggcctgagagggtgaccggccacattgggactgagatacggcccagactcctacgggaggcagcagtggggaatattgcacaatgggcggaagcctgatgcagcaacgccgcgtgcgggatgacggccttcgggttgtaaaccgctttcgcctgtgacgaagcgtgagtgacggtaatgggtaaagaagcaccggctaactacgtgccagcagccgcggtgatacgtagggtgcgagcgttgt…	Bacteria;	k__Bacteria;p__Actinobacteria;c__Actinobacteria;o__Actinomycetales;f__Propionibacteriaceae;g__Propionibacterium;s__acnes;	Unclassified;	Bacteria;"Actinobacteria";Actinobacteria;Actinobacteridae;Actinomycetales;Propionibacterineae;Propionibacteriaceae;Propionibacterium;	Bacteria;Actinobacteria;Actinobacteria;Propionibacteriales;Propionibacteriaceae;Cutibacterium;
AF060_301	cataagactgggataactccgggaaaccggggctaataccggataacattttgaactgcatggttcgaaattgaaaggcggcttcggctgtcacttatggatggacccgcgtcgcattagctagttggtgaggtaacggctcaccaaggcaacgatgcgtagccgacctgagagggtgatcggccacactgggactgagacacggcccagactcctacgggaggcagcagtagggaatcttccgcaatggacgaaagtctgacggagcaacgccgcgtgagtgatgaaggctttcgggtcgtaaaactctgttgttagggaagaacaagtgctagttgaataagctggcaccttgacggtacctaaccagaaagccacggctaactacgtgccagcagc…	Bacteria;	k__Bacteria;p__Firmicutes;c__Bacilli;o__Bacillales;f__Bacillaceae;	Unclassified;	Bacteria;Firmicutes;Bacilli;Bacillales;Bacillaceae 1;Bacillus;	Bacteria;Firmicutes;Bacilli;Bacillales;Bacillaceae;Bacillus;
AF061_001	tataagactgggataacttcgggaaaccggagctaataccggataatatttcgaaccgcatggttcgatagtgaaagatggctttgctatcacttatagatggacctgcgccgtattagctagttggtaaggtaacggcttaccaaggcaacgatacgtagccgacctgagagggtgatcggccacactggaactgagacacggtccagactcctacgggaggcagcagtagggaatcttccgcaatgggcgaaagcctgacggagcaacgccgcgtgagtgatgaaggtcttcggatcgtaaaactctgttattagggaagaacaaacgtgtaagtaactgtgcacgtcttgacggtacctaatcagaaagccacggctaactacgtgccagcagccg…	Bacteria;	k__Bacteria;p__Firmicutes;c__Bacilli;o__Bacillales;f__Staphylococcaceae;g__Staphylococcus;	Unclassified;	Bacteria;Firmicutes;Bacilli;Bacillales;Staphylococcaceae;Staphylococcus;	Bacteria;Firmicutes;Bacilli;Bacillales;Staphylococcaceae;Staphylococcus;
AF061_002	ctgaggtgggggacaaccccgggaaactggggctaataccgcatatgggctgaggcccaaagccgagaggcgcctttggagcggcctgcgtccgattaggtagttggtggggtaaaggcctaccaagcctgcgatcggtagctggtctgagaggacgaccagccacactgggactgagacacggcccagactcctacgggaggcagcagtggggaatattggacaatgggcgaaagcctgatccagcaatgccgcgtgggtgaagaaggtcttcggatcgtaaagccctttcgacggggacgatgatgacggtacccgtagaagaagccccggctaacttcgtgccagcagccgcggtaatacgaagggggctagcgttgctcggaattactgggcgta…	Bacteria;Proteobacteria;Alphaproteobacteria;Rhodospirillales;Acetobacteraceae;Roseomonas;	k__Bacteria;p__Proteobacteria;c__Alphaproteobacteria;o__Rhodospirillales;f__Acetobacteraceae;g__Roseomonas;s__mucosa;	Bacteria;Proteobacteria;Alphaproteobacteria;Rhodospirillales;Acetobacteraceae;Roseomonas;	Bacteria;"Proteobacteria";Alphaproteobacteria;Rhodospirillales;Acetobacteraceae;Roseomonas;	Bacteria;Proteobacteria;Alphaproteobacteria;Acetobacterales;Acetobacteraceae;Roseomonas;
AF062_001	tataagactgggataacttcgggaaaccggagctaataccggataatatattgaaccgcatggttcaatagtgaaagacggttttgctgtcacttatagatggatccgcgccgcattagctagttggtaaggtaacggcttaccaaggcaacgatgcgtagccgacctgagagggtgatcggccacactggaactgagacacggtccagactcctacgggaggcagcagtagggaatcttccgcaatgggcgaaagcctgacggagcaacgccgcgtgagtgatgaaggtcttcggatcgtaaaactctgttattagggaagaacaaatgtgtaagtaactatgcacgtcttgacggtacctaatcagaaagccacggctaactacgtgccagcagccg…	Bacteria;	k__Bacteria;p__Firmicutes;c__Bacilli;o__Bacillales;f__Staphylococcaceae;g__Staphylococcus;s__epidermidis;	Unclassified;	Bacteria;Firmicutes;Bacilli;Bacillales;Staphylococcaceae;Staphylococcus;	Bacteria;Firmicutes;Bacilli;Bacillales;Staphylococcaceae;Staphylococcus;
AF062_002	tactagcgggggataactattggaaacgatagctaataccgcataacagcatttaacccatgttagatgcttgaaagaagcaattgcttcactagtagatggacctgcgttgtattagctagttggtgaggtaacggctcaccaaggcgacgatacatagccgacctgagagggtgatcggccacactgggactgagacacggcccagactcctacgggaggcagcagtagggaatcttcggcaatgggggcaaccctgaccgagcaacgccgcgtgagtgaagaaggttttcggatcgtaaagctctgttgtaagagaagaacgtgtgtgagagtggaaagttcacacagtgacggtaacttaccagaaagggacggctaactacgtgccagcagccg…	Bacteria;Firmicutes;Bacilli;Lactobacillales;Streptococcaceae;Streptococcus;	k__Bacteria;p__Firmicutes;c__Bacilli;o__Lactobacillales;f__Streptococcaceae;g__Streptococcus;s__luteciae;	Unclassified;	Bacteria;Firmicutes;Bacilli;Lactobacillales;Streptococcaceae;Streptococcus;	Bacteria;Firmicutes;Bacilli;Lactobacillales;Streptococcaceae;Streptococcus;
AF062_004	tataagactgggataacttcgggaaaccggagctaataccggataacatgttgaaccgcatggttcaacagtgaaagacggtcttgctgtcacttatagatggatccgcgccgcattagctagttggtaaggtaacggcttaccaaggcaacgatgcgtagccgacctgagagggtgatcggccacactggaactgagacacggtccagactcctacgggaggcagcagtagggaatcttccgcaatgggcgaaagcctgacggagcaacgccgcgtgagtgaagaaggtcttcggatcgtaaaactctgttattagggaagaacaaatgtgtaagtaactatgcacgtcttgacggtacctaatcagaaagccacggctaactacgtgccagcagccg…	Bacteria;	k__Bacteria;p__Firmicutes;c__Bacilli;o__Bacillales;f__Staphylococcaceae;g__Staphylococcus;	Unclassified;	Bacteria;Firmicutes;Bacilli;Bacillales;Staphylococcaceae;Staphylococcus;	Bacteria;Firmicutes;Bacilli;Bacillales;Staphylococcaceae;Staphylococcus;
AF063_001	cataagactgggataactccgggaaaccggggctaataccggataacattttgaactgcatggttcgaaattgaaaggcggcttcggctgtcacttatggatggacccgcgtcgcattagctagttggtgaggtaacggctcaccaaggcaacgatgcgtagccgacctgagagggtgatcggccacactgggactgagacacggcccagactcctacgggaggcagcagtagggaatcttccgcaatggacgaaagtctgacggagcaacgccgcgtgagtgatgaaggctttcgggtcgtaaaactctgttgttagggaagaacaagtgctagttgaataagctggcaccttgacggtacctaaccagaaagccacggctaactacgtgccagcagc…	Bacteria;	k__Bacteria;p__Firmicutes;c__Bacilli;o__Bacillales;f__Bacillaceae;	Unclassified;	Bacteria;Firmicutes;Bacilli;Bacillales;Bacillaceae 1;Bacillus;	Bacteria;Firmicutes;Bacilli;Bacillales;Bacillaceae;Bacillus;
AF063_002	cgaggtagaggtaaatcttggggaaatcgaacctaataccggataggatcttctccttcatgggagatgattgaaagatggtttcggctatcacttacagatgggcccgcggtgcattagctagttggtgaggtaacggctcaccaaggcaacgatgcatagccgacctgagagggtgatcggccacactgggactgagacacggcccagactcctacgggaggcagcagtagggaatcttccgcaatggacgaaagtctgacggagcaacgccgcgtgagtgatgaaggctttcgggtcgtaaaactctgttgttagggaagaacaagtacaagagtaactgcttgtaccttgacggtacctaaccagaaagccacggctaactacgtgccagcagcc…	Bacteria;Firmicutes;Bacilli;Bacillales;Bacillaceae;Bacillus;	k__Bacteria;p__Firmicutes;c__Bacilli;o__Bacillales;f__Bacillaceae;g__Bacillus;s__flexus;	Unclassified;	Bacteria;Firmicutes;Bacilli;Bacillales;Bacillaceae 1;Bacillus;	Bacteria;Firmicutes;Bacilli;Bacillales;Bacillaceae;Bacillus;
AF063_003	tataanactgggataacttcgggaaaccggagctaataccggataatatattgaaccgcatggttcaatagtgaaagacggttttgctgtcacttatagatggatccgcgccgcattagctagttggtaaggtaacggcttaccaaggcaacgatgcgtagccgacctgagagggtgatcggccacactggaactgagacacggtccagactcctacgggaggcagcagtagggaatcttccgcaatgggcgaaagcctgacggagcaacgccgcgtgagtgatgaaggtcttcggatcgtaaaactctgttattagggaagaacaaatgtgtaagtaactatgcacgtcttgacggtacctaatcagaaagccacggctaactacgtgccagcagccg…	Bacteria;	k__Bacteria;p__Firmicutes;c__Bacilli;o__Bacillales;f__Staphylococcaceae;g__Staphylococcus;s__epidermidis;	Unclassified;	Bacteria;Firmicutes;Bacilli;Bacillales;Staphylococcaceae;Staphylococcus;	Bacteria;Firmicutes;Bacilli;Bacillales;Staphylococcaceae;Staphylococcus;
AF063_004	tataagactgggataacttcgggaaaccggagctaataccggataacatttggaaccgcatggttctaaagtgaaagatggttttgctatcacttatagatggacccgcgccgtattagctagttggtaaggtaacggcttaccaaggcgacgatacgtagccgacctgagagggtgatcggccacactggaactgagacacggtccagactcctacgggaggcagcagtagggaatcttccgcaatgggcgaaagcctgacggagcaacgccgcgtgagtgatgaagggtttcggctcgtaaaactctgttattagggaagaacaaacgtgtaagtaactgtgcacgtcttgacggtacctaatcagaaagccacggctaactacgtgccagcagccg…	Bacteria;Firmicutes;Bacilli;Bacillales;Staphylococcaceae;Staphylococcus;	k__Bacteria;p__Firmicutes;c__Bacilli;o__Bacillales;f__Staphylococcaceae;g__Staphylococcus;	Bacteria;Firmicutes;Bacilli;Bacillales;Staphylococcaceae;Staphylococcus;	Bacteria;Firmicutes;Bacilli;Bacillales;Staphylococcaceae;Staphylococcus;	Bacteria;Firmicutes;Bacilli;Bacillales;Staphylococcaceae;Staphylococcus;
AF063_005	tataagactgggataacttcgggaaaccggagctaataccggataacatttggaaccgcatggttctaaagtgaaagatggttttgctatcacttatagatggacccgcgccgtattagctagttggtaaggtaacggcttaccaaggcgacgatacgtagccgacctgagagggtgatcggccacactggaactgagacacggtccagactcctacgggaggcagcagtagggaatcttccgcaatgggcgaaagcctgacggagcaacgccgcgtgagtgatgaagggtttcggctcgtaaaactctgttattagggaagaacaaacgtgtaagtaactgtgcacgtcttgacggtacctaatcagaaagccacggctaactacgtgccagcagccg…	Bacteria;Firmicutes;Bacilli;Bacillales;Staphylococcaceae;Staphylococcus;	k__Bacteria;p__Firmicutes;c__Bacilli;o__Bacillales;f__Staphylococcaceae;g__Staphylococcus;	Bacteria;Firmicutes;Bacilli;Bacillales;Staphylococcaceae;Staphylococcus;	Bacteria;Firmicutes;Bacilli;Bacillales;Staphylococcaceae;Staphylococcus;	Bacteria;Firmicutes;Bacilli;Bacillales;Staphylococcaceae;Staphylococcus;
AF063_006	catggtagaggtaaatcttggggaagccggacctaataccggataatatttcgaaccgcatggttcgatagtgaaagatggctctgctatcacttatagatggacctgcgccgtattagctagttggtaaggtaacggcttaccaaggcaacgatacgtagccgacctgagagggtgatcggccacactggaactgagacacggtccagactcctacgggaggcagcagtagggaatcttccgcaatgggcgaaagcctgacggagcaacgccgcgtgagtgatgaaggtcttcggatcgtaaaactctgttattagggaagaacaaacgtgtaagtaactgtgcacgtcttgacggtacctaatcagaaagccacggctaactacgtgccagcagccg…	Bacteria;	k__Bacteria;p__Firmicutes;c__Bacilli;o__Bacillales;f__Staphylococcaceae;g__Staphylococcus;	Unclassified;	Bacteria;Firmicutes;Bacilli;Bacillales;Staphylococcaceae;Staphylococcus;	Bacteria;Firmicutes;Bacilli;Bacillales;Staphylococcaceae;Staphylococcus;
AF063_007	tataagactgggataacttcgggaaaccggagctaataccggataatatattgaaccgcatggttcaatagtgaaagacggttttgctgtcacttatagatggatccgcgccgcattagctagttggtaaggtaacggcttaccaaggcaacgatgcgtagccgacctgagagggtgatcggccacactggaactgagacacggtccagactcctacgggaggcagcagtagggaatcttccgcaatgggcgaaagcctgacggagcaacgccgcgtgagtgatgaaggtcttcggatcgtaaaactctgttattagggaagaacaaatgtgtaagtaactatgcacgtcttgacggtacctaatcagaaagccacggctaactacgtgccagcagccg…	Bacteria;Firmicutes;Bacilli;Bacillales;Staphylococcaceae;Staphylococcus;	k__Bacteria;p__Firmicutes;c__Bacilli;o__Bacillales;f__Staphylococcaceae;g__Staphylococcus;s__epidermidis;	Unclassified;	Bacteria;Firmicutes;Bacilli;Bacillales;Staphylococcaceae;Staphylococcus;	Bacteria;Firmicutes;Bacilli;Bacillales;Staphylococcaceae;Staphylococcus;
AF063_008	cataagactgggataactccgggaaaccggggctaataccggataacattttgaactgcatggttcgaaattgaaaggcggcttcggctgtcacttatggatggacccgcgtcgcattagctagttggtgaggtaacggctcaccaaggcaacgatgcgtagccgacctgagagggtgatcggccacactgggactgagacacggcccagactcctacgggaggcagcagtagggaatcttccgcaatggacgaaagtctgacggagcaacgccgcgtgagtgatgaaggctttcgggtcgtaaaactctgttgttagggaagaacaagtgctagttgaataagctggcaccttgacggtacctaaccagaaagccacggctaactacgtgccagcagc…	Bacteria;	k__Bacteria;p__Firmicutes;c__Bacilli;o__Bacillales;f__Bacillaceae;	Unclassified;	Bacteria;Firmicutes;Bacilli;Bacillales;Bacillaceae 1;Bacillus;	Bacteria;Firmicutes;Bacilli;Bacillales;Bacillaceae;Bacillus;
AF063_101	tataagactgggataacttcgggaaaccggagctaataccggataacatttggaaccgcatggttctaaagtgaaagatggttttgctatcacttatagatggacccgcgccgtattagctagttggtaaggtaacggcttaccaaggcgacgatacgtagccgacctgagagggtgatcggccacactggaactgagacacggtccagactcctacgggaggcagcagtagggaatcttccgcaatgggcgaaagcctgacggagcaacgccgcgtgagtgatgaagggtttcggctcgtaaaactctgttattagggaagaacaaatgtgtaagtaactgtgcacgtcttgacggtacctaatcagaaagccacggctaactacgtgccagcagccg…	Bacteria;Firmicutes;Bacilli;Bacillales;Staphylococcaceae;Staphylococcus;	k__Bacteria;p__Firmicutes;c__Bacilli;o__Bacillales;f__Staphylococcaceae;g__Staphylococcus;	Unclassified;	Bacteria;Firmicutes;Bacilli;Bacillales;Staphylococcaceae;Staphylococcus;	Bacteria;Firmicutes;Bacilli;Bacillales;Staphylococcaceae;Staphylococcus;
AF063_102	tataagactgggataacttcgggaaaccggagctaataccggataatatttcgaaccgcatggttcgatagtgaaagatggctttgctatcacttatagatggacctgcgccgtattagctagttggtaaggtaacggcttaccaaggcaacgatacgtagccgacctgagagggtgatcggccacactggaactgagacacggtccagactcctacgggaggcagcagtagggaatcttccgcaatgggcgaaagcctgacggagcaacgccgcgtgagtgatgaaggtcttcggatcgtaaaactctgttattagggaagaacaaacgtgtaagtaactgtgcacgtcttgacggtacctaatcagaaagccacggctaactacgtgccagcagccg…	Bacteria;	k__Bacteria;p__Firmicutes;c__Bacilli;o__Bacillales;f__Staphylococcaceae;g__Staphylococcus;	Unclassified;	Bacteria;Firmicutes;Bacilli;Bacillales;Staphylococcaceae;Staphylococcus;	Bacteria;Firmicutes;Bacilli;Bacillales;Staphylococcaceae;Staphylococcus;
AF063_103	tataagactgggataacttcgggaaaccggagctaataccggataatatttcgaaccgcatggttcgatagtgaaagatggctttgctatcacttatagatggacctgcgccgtattagctagttggtaaggtaacggcttaccaaggcaacgatacgtagccgacctgagagggtgatcggccacactggaactgagacacggtccagactcctacgggaggcagcagtagggaatcttccgcaatgggcgaaagcctgacggagcaacgccgcgtgagtgatgaaggtcttcggatcgtaaaactctgttattagggaagaacaaacgtgtaagtaactgtgcacgtcttgacggtacctaatcagaaagccacggctaactacgtgccagcagccg…	Bacteria;	k__Bacteria;p__Firmicutes;c__Bacilli;o__Bacillales;f__Staphylococcaceae;g__Staphylococcus;	Unclassified;	Bacteria;Firmicutes;Bacilli;Bacillales;Staphylococcaceae;Staphylococcus;	Bacteria;Firmicutes;Bacilli;Bacillales;Staphylococcaceae;Staphylococcus;
AF063_104	ctggcaaggtagattttaatcgggaactggttcttctactggataggaacgtctaccgcatggtggatgttggaaagaatttcggtcatggatggactcgcggcctatcagcttgttggtgaggtaatggctcaccaaggcgacgacgggtagccggcctgagagggtgaccggccacactgggactgagacacggcccagactcctacgggaggcagcagtggggaatattgcacaatgggcgaaagcctgatgcagcgacgccgcgtgagggatgacggccttcgggttgtaaacctctttcagtagggaagaagcgaaagtgacggtacctgcagaagaagcaccggctaactacgtgccagcagccgcggtaatacgtagggtgcgagcgttatc…	Bacteria;Actinobacteria;Micrococcales;Micrococcaceae;Micrococcus;	k__Bacteria;p__Actinobacteria;c__Actinobacteria;o__Actinomycetales;f__Micrococcaceae;g__Micrococcus;	Unclassified;	Bacteria;"Actinobacteria";Actinobacteria;Actinobacteridae;Actinomycetales;Micrococcineae;Micrococcaceae;Micrococcus;	Bacteria;Actinobacteria;Actinobacteria;Micrococcales;Micrococcaceae;Micrococcus;
AF063_105	cttaactctgggataagcctgggaaactgggtctaataccggataggagcgtccaccgcatggtgggtgttggaaagatttatcggttttggatggactcgcggcctatcagcttgttggtgaggtaatggctcaccaaggcgacgacgggtagccggcctgagagggtgaccggccacactgggactgagacacggcccagactcctacgggaggcagcagtggggaatattgcacaatgggcgcaagcctgatgcagcgacgccgcgtgagggatgacggccttcgggttgtaaacctctttcagtagggaagaagcgaaagtgacggtacctgcagaagaagcaccggctaactacgtgccagcagccgcggtaatacgtagggtgcgagcgttat…	Bacteria;Actinobacteria;Micrococcales;Micrococcaceae;Micrococcus;	k__Bacteria;p__Actinobacteria;c__Actinobacteria;o__Actinomycetales;f__Micrococcaceae;g__Micrococcus;s__luteus;	Unclassified;	Bacteria;"Actinobacteria";Actinobacteria;Actinobacteridae;Actinomycetales;Micrococcineae;Micrococcaceae;Micrococcus;	Bacteria;Actinobacteria;Actinobacteria;Micrococcales;Micrococcaceae;Micrococcus;
AF063_106	cttgactctaggataagcccgggaaactgggtctaatactggataggaacgtctaccgcatggtggatgttggaaagaatttcggtcatggatggactcgcggcctatcagcttgttggtgaggtaatggctcaccaaggcgacgacgggtagccggcctgagagggtgaccggccacactgggactgagacacggcccagactcctacgggaggcagcagtggggaatattgcacaatgggcgaaagcctgatgcagcgacgccgcgtgagggatgacggccttcgggttgtaaacctctttcagtagggaagaagcgaaagtgacggtacctgcagaagaagcaccggctaactacgtgccagcagccgcggtaatacgtagggtgcgagcgttatc…	Bacteria;Actinobacteria;Micrococcales;Micrococcaceae;Micrococcus;	k__Bacteria;p__Actinobacteria;c__Actinobacteria;o__Actinomycetales;f__Micrococcaceae;g__Micrococcus;	Unclassified;	Bacteria;"Actinobacteria";Actinobacteria;Actinobacteridae;Actinomycetales;Micrococcineae;Micrococcaceae;Micrococcus;	Bacteria;Actinobacteria;Actinobacteria;Micrococcales;Micrococcaceae;Micrococcus;
AF063_201	cttgactttgggataacttcaggaaactggggctaataccggataggagctcctgctgcatggtgggggttggaaagtttcggcggttggggatggactcgcggcttatcagcttgttggtggggtagtggcttaccaaggctttgacgggtagccggcctgagagggtgaccggccacattgggactgagatacggcccagactcctacgggaggcagcagtggggaatattgcacaatgggcggaagcctgatgcagcaacgccgcgtgcgggatgacggccttcgggttgtaaaccgctttcgcctgtgacgaagcgtgagtgacggtaatgggtaaagaagcaccggctaactacgtgccagcagccgcggtgatacgtagggtgcgagcgttgt…	Bacteria;	k__Bacteria;p__Actinobacteria;c__Actinobacteria;o__Actinomycetales;f__Propionibacteriaceae;g__Propionibacterium;s__acnes;	Unclassified;	Bacteria;"Actinobacteria";Actinobacteria;Actinobacteridae;Actinomycetales;Propionibacterineae;Propionibacteriaceae;Propionibacterium;	Bacteria;Actinobacteria;Actinobacteria;Propionibacteriales;Propionibacteriaceae;Cutibacterium;
AF063_202	tataagactgggataacttcgggaaaccggagctaataccggataatatttcgaaccgcatggttcgatagtgaaagatggctttgctatcacttatagatggacctgcgccgtattagctagttggtaaggtaacggcttaccaaggcaacgatacgtagccgacctgagagggtgatcggccacactggaactgagacacggtccagactcctacgggaggcagcagtagggaatcttccgcaatgggcgaaagcctgacggagcaacgccgcgtgagtgatgaaggtcttcggatcgtaaaactctgttattagggaagaacaaacgtgtaagtaactgtgcacgtcttgacggtacctaatcagaaagccacggctaactacgtgccagcagccg…	Bacteria;	k__Bacteria;p__Firmicutes;c__Bacilli;o__Bacillales;f__Staphylococcaceae;g__Staphylococcus;	Unclassified;	Bacteria;Firmicutes;Bacilli;Bacillales;Staphylococcaceae;Staphylococcus;	Bacteria;Firmicutes;Bacilli;Bacillales;Staphylococcaceae;Staphylococcus;
AF063_401	catggtactggtaaatcttgnggaagccggacctaataccggataacatttggaaccgcatggttctaaagtgaaagatggttttgctatcacttatagatggacccgcgccgtattagctagttggtaaggtaacggcttaccaaggcgacgatacgtagccgacctgagagggtgatcggccacactggaactgagacacggtccagactcctacgggaggcagcagtagggaatcttccgcaatgggcgaaagcctgacggagcaacgccgcgtgagtgatgaagggtttcggctcgtaaaactctgttattagggaagaacaaatgtgtaagtaactgtgcacgtcttgacggtacctaatcagaaagccacggctaactacgtgccagcagccg…	Bacteria;Firmicutes;Bacilli;Bacillales;Staphylococcaceae;Staphylococcus;	k__Bacteria;p__Firmicutes;c__Bacilli;o__Bacillales;f__Staphylococcaceae;g__Staphylococcus;	Bacteria;Firmicutes;Bacilli;Bacillales;Staphylococcaceae;Staphylococcus;	Bacteria;Firmicutes;Bacilli;Bacillales;Staphylococcaceae;Staphylococcus;	Bacteria;Firmicutes;Bacilli;Bacillales;Staphylococcaceae;Staphylococcus;
AF063_402	tataanactgggataacttcgggaaaccggagctaataccggataacatttggaaccgcatggttctaaagtgaaagatggttttgctatcacttatagatggacccgcgccgtattagctagttggtaaggtaacggcttaccaaggcgacgatacgtagccgacctgagagggtgatcggccacactggaactgagacacggtccagactcctacgggaggcagcagtagggaatcttccgcaatgggcgaaagcctgacggagcaacgccgcgtgagtgatgaagggtttcggctcgtaaaactctgttattagggaagaacaaacgtgtaagtaactgtgcacgtcttgacggtacctaatcagaaagccacggctaactacgtgccagcagccg…	Bacteria;Firmicutes;Bacilli;Bacillales;Staphylococcaceae;Staphylococcus;	k__Bacteria;p__Firmicutes;c__Bacilli;o__Bacillales;f__Staphylococcaceae;g__Staphylococcus;	Bacteria;Firmicutes;Bacilli;Bacillales;Staphylococcaceae;Staphylococcus;	Bacteria;Firmicutes;Bacilli;Bacillales;Staphylococcaceae;Staphylococcus;	Bacteria;Firmicutes;Bacilli;Bacillales;Staphylococcaceae;Staphylococcus;
AF063_403	gttgacgctgggataagcccgggaaactgggtctaatactggatgctacatgtcaccgcatggtggtgtgtggaaagggtttactggtcttggatgggctcacggcctatcagcttgttggtgaggtaatggctcaccaaggcgacgacgggtagccggcctgagagggtgaccggccacactgggactgagacacggcccagactcctacgggaggcagcagtggggaatattgcacaatgggcgaaagcctgatgcagcgacgccgcgtgagggatgacggccttcgggttgtaaacctctttcagcagggaagaagccacaagtgacggtacctgcagaagaagcgccggctaactacgtgccagcagccgcggtaatacgtagggcgcaagcgtt…	Bacteria;	k__Bacteria;p__Actinobacteria;c__Actinobacteria;o__Actinomycetales;f__Micrococcaceae;g__Kocuria;s__palustris;	Unclassified;	Bacteria;"Actinobacteria";Actinobacteria;Actinobacteridae;Actinomycetales;Micrococcineae;Micrococcaceae;Kocuria;	Bacteria;Actinobacteria;Actinobacteria;Micrococcales;Micrococcaceae;Kocuria;
AF063_404	cttaactctgggataagcctgggaaactgggtctaataccggataggagcgcctaccgcatggtgggtgttggaaagatttatcggttttggatggactcgcggcctatcagcttgttggtgaggtaatggctcaccaaggcgacgacgggtagccggcctgagagggtgaccggccacactgggactgagacacggcccagactcctacgggaggcagcagtggggaatattgcacaatgggcgcaagcctgatgcagcgacgccgcgtgagggatgacggccttcgggttgtaaacctctttcagtagggaagaagcgaaagtgacggtacctgcagaagaagcaccggctaactacgtgccagcagccgcggtaatacgtagggtgcgagcgttat…	Bacteria;Actinobacteria;Micrococcales;Micrococcaceae;Micrococcus;	k__Bacteria;p__Actinobacteria;c__Actinobacteria;o__Actinomycetales;f__Micrococcaceae;g__Micrococcus;s__luteus;	Unclassified;	Bacteria;"Actinobacteria";Actinobacteria;Actinobacteridae;Actinomycetales;Micrococcineae;Micrococcaceae;Micrococcus;	Bacteria;Actinobacteria;Actinobacteria;Micrococcales;Micrococcaceae;Micrococcus;
AF063_405	tataagactgggataacttcgggaaaccggagctaataccggataatatttcgaaccgcatggttcgatagtgaaagatggctttgctatcacttatagatggacctgcgccgtattagctagttggtaaggtaacggcttaccaaggcaacgatacgtagccgacctgagagggtgatcggccacactggaactgagacacggtccagactcctacgggaggcagcagtagggaatcttccgcaatgggcgaaagcctgacggagcaacgccgcgtgagtgatgaaggtcttcggatcgtaaaactctgttattagggaagaacaaacgtgtaagtaactgtgcacgtcttgacggtacctaatcagaaagccacggctaactacgtgccagcagccg…	Bacteria;	k__Bacteria;p__Firmicutes;c__Bacilli;o__Bacillales;f__Staphylococcaceae;g__Staphylococcus;	Unclassified;	Bacteria;Firmicutes;Bacilli;Bacillales;Staphylococcaceae;Staphylococcus;	Bacteria;Firmicutes;Bacilli;Bacillales;Staphylococcaceae;Staphylococcus;
AF063_407	ccaggctttgggataaccccgggaaaccggggctaataccgaatatgacctctgaccgcatggttggtggtggaaagtttttcggcttgggatgggctcgcggcctatcagcttgttggtggggtgatggcctaccaaggcgacgacgggtagccggcctgagagggcgaccggccacactgggactgagacacggcccagactcctacgggaggcagcagtggggaatattgcacaatgggcggaagcctgatgcagcgacgccgcgtgagggatgacggccttcgggttgtaaacctctttcagcagggacgaagcgtaagtgacggtacctgcagaagaagcgccggccaactacgtgccagcagccgcggtaagacgtagggcgcgagcgttgtc…	Bacteria;Actinobacteria;Micromonosporales;Micromonosporaceae;Micromonospora;	k__Bacteria;p__Actinobacteria;c__Actinobacteria;o__Actinomycetales;f__Micromonosporaceae;	Unclassified;	Bacteria;"Actinobacteria";Actinobacteria;Actinobacteridae;Actinomycetales;Micromonosporineae;Micromonosporaceae;Micromonospora;	Bacteria;Actinobacteria;Actinobacteria;Micromonosporales;Micromonosporaceae;Micromonospora;
AF063_408	tataagactgggataacttcgggaaaccggagctaataccggataatatttcgaaccgcatggttcgatagtgaaagatggctctgctatcacttatagatggacctgcgccgtattagctagttggtaaggtaacggcttaccaaggcaacgatacgtagccgacctgagagggtgatcggccacactggaactgagacacggtccagactcctacgggaggcagcagtagggaatcttccgcaatgggcgaaagcctgacggagcaacgccgcgtgagtgatgaaggtcttcggatcgtaaaactctgttattagggaagaacaaacgtgtaagtaactgtgcacgtcttgacggtacctaatcagaaagccacggctaactacgtgccagcagccg…	Bacteria;Firmicutes;Bacilli;Bacillales;Staphylococcaceae;Staphylococcus;	k__Bacteria;p__Firmicutes;c__Bacilli;o__Bacillales;f__Staphylococcaceae;g__Staphylococcus;	Unclassified;	Bacteria;Firmicutes;Bacilli;Bacillales;Staphylococcaceae;Staphylococcus;	Bacteria;Firmicutes;Bacilli;Bacillales;Staphylococcaceae;Staphylococcus;
AF063_409	cttgactctaggataagcccgggaaactgggtctaatactggataggaacgtctaccgcatggtggatgttggaaagaatttcggtcatggatggactcgcggcctatcagcttgttggtgaggtaatggctcaccaaggcgacgacgggtagccggcctgagagggtgaccggccacactgggactgagacacggcccagactcctacgggaggcagcagtggggaatattgcacaatgggcgaaagcctgatgcagcgacgccgcgtgagggatgacggccttcgggttgtaaacctctttcagtagggaagaagcgaaagtgacggtacctgcagaagaagcaccggctaactacgtgccagcagccgcggtaatacgtagggtgcgagcgttatc…	Bacteria;Actinobacteria;Micrococcales;Micrococcaceae;Micrococcus;	k__Bacteria;p__Actinobacteria;c__Actinobacteria;o__Actinomycetales;f__Micrococcaceae;g__Micrococcus;	Unclassified;	Bacteria;"Actinobacteria";Actinobacteria;Actinobacteridae;Actinomycetales;Micrococcineae;Micrococcaceae;Micrococcus;	Bacteria;Actinobacteria;Actinobacteria;Micrococcales;Micrococcaceae;Micrococcus;
AF063_410	cttgactctaggataagcccgggaaactgggtctaatactggataggaacgtctaccgcatggtggatgttggaaagaatttcggtcatggatggactcgcggcctatcagcttgttggtgaggtaatggctcaccaaggcgacgacgggtagccggcctgagagggtgaccggccacactgggactgagacacggcccagactcctacgggaggcagcagtggggaatattgcacaatgggcgaaagcctgatgcagcgacgccgcgtgagggatgacggccttcgggttgtaaacctctttcagtagggaagaagcgaaagtgacggtacctgcagaagaagcaccggctaactacgtgccagcagccgcggtaatacgtagggtgcgagcgttatc…	Bacteria;Actinobacteria;Micrococcales;Micrococcaceae;Micrococcus;	k__Bacteria;p__Actinobacteria;c__Actinobacteria;o__Actinomycetales;f__Micrococcaceae;g__Micrococcus;	Unclassified;	Bacteria;"Actinobacteria";Actinobacteria;Actinobacteridae;Actinomycetales;Micrococcineae;Micrococcaceae;Micrococcus;	Bacteria;Actinobacteria;Actinobacteria;Micrococcales;Micrococcaceae;Micrococcus;
AF063_602	tataagactgggataacttcgggaaaccggagctaataccggataacatttggaaccgcatggttctaaagtgaaagatggttttgctatcacttatagatggacccgcgccgtattagctagttggtaaggtaacggcttaccaaggcgacgatacgtagccgacctgagagggtgatcggccacactggaactgagacacggtccagactcctacgggaggcagcagtagggaatcttccgcaatgggcgaaagcctgacggagcaacgccgcgtgagtgatgaagggtttcggctcgtaaaactctgttattagggaagaacaaacgtgtaagtaactgtgcacgtcttgacggtacctaatcagaaagccacggctaactacgtgccagcagccg…	Bacteria;Firmicutes;Bacilli;Bacillales;Staphylococcaceae;Staphylococcus;	k__Bacteria;p__Firmicutes;c__Bacilli;o__Bacillales;f__Staphylococcaceae;g__Staphylococcus;	Bacteria;Firmicutes;Bacilli;Bacillales;Staphylococcaceae;Staphylococcus;	Bacteria;Firmicutes;Bacilli;Bacillales;Staphylococcaceae;Staphylococcus;	Bacteria;Firmicutes;Bacilli;Bacillales;Staphylococcaceae;Staphylococcus;
AF063_701	tataagactggaataactccgggaaaccggggctaatgccggataacatttagaaccgcatggttctaaagtgaaagatggttttgctatcacttatagatggacccgcgccgtattagctagttggtaaggtaacggcttaccaaggcaacgatacgtagccgacctgagagggtgatcggccacactggaactgagacacggtccagactcctacgggaggcagcagtagggaatcttccgcaatgggcgaaagcctgacggagcaacgccgcgtgagtgatgaaggtcttcggatcgtaaaactctgttattagggaagaacaaatgtgtaagtaactgtgcacgtcttgacggtacctaatcagaaagccacggctaactacgtgccagcagccg…	Bacteria;Firmicutes;Bacilli;	k__Bacteria;p__Firmicutes;c__Bacilli;o__Bacillales;f__Staphylococcaceae;g__Staphylococcus;	Bacteria;Firmicutes;Bacilli;Bacillales;Staphylococcaceae;Staphylococcus;	Bacteria;Firmicutes;Bacilli;Bacillales;Staphylococcaceae;Staphylococcus;	Bacteria;Firmicutes;Bacilli;Bacillales;Staphylococcaceae;Staphylococcus;
AF064_001	tataagactgggataacttcgggaaaccggagctaataccggataatatttcgaaccgcatggttcgatagtgaaagatggctttgctatcacttatagatggacctgcgccgtattagctagttggtaaggtaacggcttaccaaggcaacgatacgtagccgacctgagagggtgatcggccacactggaactgagacacggtccagactcctacgggaggcagcagtagggaatcttccgcaatgggcgaaagcctgacggagcaacgccgcgtgagtgatgaaggtcttcggatcgtaaaactctgttattagggaagaacaaacgtgtaagtaactgtgcacgtcttgacggtacctaatcagaaagccacggctaactacgtgccagcagccg…	Bacteria;	k__Bacteria;p__Firmicutes;c__Bacilli;o__Bacillales;f__Staphylococcaceae;g__Staphylococcus;	Unclassified;	Bacteria;Firmicutes;Bacilli;Bacillales;Staphylococcaceae;Staphylococcus;	Bacteria;Firmicutes;Bacilli;Bacillales;Staphylococcaceae;Staphylococcus;
AF064_002	tgtaagactgggataactccgggaaaccggagctaataccggatagttccttgaaccgcatggttcaaggatgaaagacggtttcggctgtcacttacagatggacccgcggcgcattagctagttggtgaggtaacggctcaccaaggcgacgatgcgtagccgacctgagagggtgatcggccacactgggactgagacacggcccagactcctacgggaggcagcagtagggaatcttccgcaatggacgaaagtctgacggagcaacgccgcgtgagtgatgaaggttttcggatcgtaaagctctgttgttagggaagaacaagtgcaagagtaactgcttgcaccttgacggtacctaaccagaaagccacggctaactacgtgccagcagcc…	Bacteria;Firmicutes;Bacilli;Bacillales;Bacillaceae;Bacillus;	k__Bacteria;p__Firmicutes;c__Bacilli;o__Bacillales;f__Bacillaceae;g__Bacillus;	Unclassified;	Bacteria;Firmicutes;Bacilli;Bacillales;Bacillaceae 1;Bacillus;	Bacteria;Firmicutes;Bacilli;Bacillales;Bacillaceae;Bacillus;
AF064_003	tataagactgggataacttcgggaaaccggagctaataccggataatatttcgaaccgcatggttcgatagtgaaagatggctttgctatcacttatagatggacctgcgccgtattagctagttggtaaggtaacggcttaccaaggcaacgatacgtagccgacctgagagggtgatcggccacactggaactgagacacggtccagactcctacgggaggcagcagtagggaatcttccgcaatgggcgaaagcctgacggagcaacgccgcgtgagtgatgaaggtcttcggatcgtaaaactctgttattagggaagaacaaacgtgtaagtaactgtgcacgtcttgacggtacctaatcagaaagccacggctaactacgtgccagcagccg…	Bacteria;	k__Bacteria;p__Firmicutes;c__Bacilli;o__Bacillales;f__Staphylococcaceae;g__Staphylococcus;	Bacteria;Firmicutes;Bacilli;Bacillales;Staphylococcaceae;Staphylococcus;	Bacteria;Firmicutes;Bacilli;Bacillales;Staphylococcaceae;Staphylococcus;	Bacteria;Firmicutes;Bacilli;Bacillales;Staphylococcaceae;Staphylococcus;
AF064_004	tataagactgggataacttcgggaaaccggagctaataccggataatatttcgaaccgcatggttcgatagtgaaagatggctttgctatcacttatagatggacctgcgccgtattagctagttggtaaggtaacggcttaccaaggcaacgatacgtagccgacctgagagggtgatcggccacactggaactgagacacggtccagactcctacgggaggcagcagtagggaatcttccgcaatgggcgaaagcctgacggagcaacgccgcgtgagtgatgaaggtcttcggatcgtaaaactctgttattagggaagaacaaacgtgtaagtaactgtgcacgtcttgacggtacctaatcagaaagccacggctaactacgtgccagcagccg…	Bacteria;	k__Bacteria;p__Firmicutes;c__Bacilli;o__Bacillales;f__Staphylococcaceae;g__Staphylococcus;	Unclassified;	Bacteria;Firmicutes;Bacilli;Bacillales;Staphylococcaceae;Staphylococcus;	Bacteria;Firmicutes;Bacilli;Bacillales;Staphylococcaceae;Staphylococcus;
AF065_002	tataagactgggataacttcgggaaaccggagctaataccggataatatttcgaaccgcatggttcgatagtgaaagatggctttgctatcacttatagatggacctgcgccgtattagctagttggtaaggtaacggcttaccaaggcaacgatacgtagccgacctgagagggtgatcggccacactggaactgagacacggtccagactcctacgggaggcagcagtagggaatcttccgcaatgggcgaaagcctgacggagcaacgccgcgtgagtgatgaaggtcttcggatcgtaaaactctgttattagggaagaacaaacgtgtaagtaactgtgcacgtcttgacggtacctaatcagaaagccacggctaactacgtgccagcagccg…	Bacteria;	k__Bacteria;p__Firmicutes;c__Bacilli;o__Bacillales;f__Staphylococcaceae;g__Staphylococcus;	Unclassified;	Bacteria;Firmicutes;Bacilli;Bacillales;Staphylococcaceae;Staphylococcus;	Bacteria;Firmicutes;Bacilli;Bacillales;Staphylococcaceae;Staphylococcus;
AF065_003	tataaganngggataacttcnggaaaccggagctaataccggataatatattgaaccgcatggttcaatagtgaaagacggttttgctgtcacttatagatggatccgcgccgcattagctagttggtaaggtaacggcttaccaaggcaacgatgcgtagccgacctgagagggtgatcggccacactggaactgagacacggtccagactcctacgggaggcagcagtagggaatcttccgcaatgggcgaaagcctgacggagcaacgccgcgtgagtgatgaaggtcttcggatcgtaaaactctgttattagggaagaacaaatgtgtaagtaactatgcacgtcttgacggtacctaatcagaaagccacggctaactacgtgccagcagccg…	Bacteria;	k__Bacteria;p__Firmicutes;c__Bacilli;o__Bacillales;f__Staphylococcaceae;g__Staphylococcus;s__epidermidis;	Unclassified;	Bacteria;Firmicutes;Bacilli;Bacillales;Staphylococcaceae;Staphylococcus;	Bacteria;Firmicutes;Bacilli;Bacillales;Staphylococcaceae;Staphylococcus;
AF065_004	ctatagttggggataactccgggaaaccggggctaataccgaataatacattccttctcctgttggaatgttgaaagatggtttacgctatcgctataggatgggcccgcggcgcattagctagttggtgaggtaacggctcaccaaggcgacgatgcgtagccgacctgagagggtgatcggccacactgggactgagacacggcccagactcctacgggaggcagcagtagggaatcttccacaatgggcgaaagcctgatggagcaacgccgcgtgagtgaagaaggttttcggatcgtaaaactctgttgtaagggaagaacaagtacagtagtaactggctgtaccttgacggtaccttattagaaagccacggctaactacgtgccagcagcc…	Bacteria;Firmicutes;Bacilli;Bacillales;Bacillaceae;	k__Bacteria;p__Firmicutes;c__Bacilli;o__Bacillales;f__Planococcaceae;	Bacteria;Firmicutes;Bacilli;Bacillales;Bacillaceae;Lysinibacillus;	Bacteria;Firmicutes;Bacilli;Bacillales;Planococcaceae;Lysinibacillus;	Bacteria;Firmicutes;Bacilli;Bacillales;Planococcaceae;Lysinibacillus;
AF066_001	tataagactgggataacttcgggaaaccggagctaataccggataatatattgaaccgcatggttcaatagtgaaagacggttttgctgtcacttatagatggatccgcgccgcattagctagttggtaaggtaacggcttaccaaggcaacgatgcgtagccgacctgagagggtgatcggccacactggaactgagacacggtccagactcctacgggaggcagcagtagggaatcttccgcaatgggcgaaagcctgacggagcaacgccgcgtgagtgatgaaggtcttcggatcgtaaaactctgttattagggaagaacaaatgtgtaagtaactatgcacgtcttgacggtacctaatcagaaagccacggctaactacgtgccagcagccg…	Bacteria;	k__Bacteria;p__Firmicutes;c__Bacilli;o__Bacillales;f__Staphylococcaceae;g__Staphylococcus;s__epidermidis;	Unclassified;	Bacteria;Firmicutes;Bacilli;Bacillales;Staphylococcaceae;Staphylococcus;	Bacteria;Firmicutes;Bacilli;Bacillales;Staphylococcaceae;Staphylococcus;
AF066_002	tataagactgggataacttcgggaaaccggagctaataccggataatatttcgaaccgcatggttcgatagtgaaagatggttttgctatcacttatagatggacccgcgccgtattagctagttggtaaggtaacggcttaccaaggcgacgatacgtagccgacctgagagggtgatcggccacactggaactgagacacggtccagactcctacgggaggcagcagtagggaatcttccgcaatgggcgaaagcctgacggagcaacgccgcgtgagtgatgaaggtcttcggatcgtaaaactctgttattagggaagaacatacgtgtaagtaactatgcacgtcttgacggtacctaatcagaaagccacggctaactacgtgccagcagccg…	Bacteria;	k__Bacteria;p__Firmicutes;c__Bacilli;o__Bacillales;f__Staphylococcaceae;g__Staphylococcus;s__haemolyticus;	Unclassified;	Bacteria;Firmicutes;Bacilli;Bacillales;Staphylococcaceae;Staphylococcus;	Bacteria;Firmicutes;Bacilli;Bacillales;Staphylococcaceae;Staphylococcus;
AF066_003	cttggttctgggataacccggggaaactgggtctaatactggatacgacatgtcaccgcatggtggcgtgtggaaagggttttactggttttggatgggctcacggcctatcagcttgttggtggggtaatggctcaccaaggcgacgacgggtagccggcctgagagggtgaccggccacactgggactgagacacggcccagactcctacgggaggcagcagtggggaatattgcacaatgggcgaaagcctgatgcagcgacgccgcgtgagggatgacggccttcgggttgtaaacctctttcagcacggaagaagcgaaagtgacggtacgtgcagaagaagcgccggctaactacgtgccagcagccgcggtaatacgtagggcgcaagcgtt…	Bacteria;	k__Bacteria;p__Actinobacteria;c__Actinobacteria;o__Actinomycetales;f__Micrococcaceae;g__Kocuria;s__rhizophila;	Bacteria;Actinobacteria;Actinobacteria;Micrococcales;Micrococcaceae;Kocuria;	Bacteria;"Actinobacteria";Actinobacteria;Actinobacteridae;Actinomycetales;Micrococcineae;Micrococcaceae;Kocuria;	Bacteria;Actinobacteria;Actinobacteria;Micrococcales;Micrococcaceae;Kocuria;
AF066_004	ctgtacttcgggataagcttgggaaactgggtctaataccggatagnnnncncatgtgggtgtgtggttggaaagcttttgcggtatgggatgagctcgcggcctatcagcttgttggtggggtaatggcctaccaaggcgtcgacgggtagccggcctgagagggtgtacggccacattgggactgagatacggcccagactcctacgggaggcagcagtggggaatattgcacaatgggcgcaagcctgatgcagcgacgccgcgtgggggatgacggccttcgggttgtaaactcctttcgtcagggacgaagcgaaagtgacggtacctggataagaagcaccggctaactacgtgccagcagccgcggtaatacgtagggtgcgagcgttgtcc…	Bacteria;Actinobacteria;Corynebacteriales;Corynebacteriaceae;Corynebacterium;	k__Bacteria;p__Actinobacteria;c__Actinobacteria;o__Actinomycetales;f__Corynebacteriaceae;g__Corynebacterium;	Unclassified;	Bacteria;"Actinobacteria";Actinobacteria;Actinobacteridae;Actinomycetales;Corynebacterineae;Corynebacteriaceae;Corynebacterium;	Bacteria;Actinobacteria;Actinobacteria;Corynebacteriales;Corynebacteriaceae;Corynebacterium 1;
AF066_005	tataagactgggataacttcgggaaaccggagctaataccggataatatattgaaccgcatggttcaatagtgaaagacggttttgctgtcacttatagatggatccgcgccgcattagctagttggtaaggtaacggcttaccaaggcaacgatgcgtagccgacctgagagggtgatcggccacactggaactgagacacggtccagactcctacgggaggcagcagtagggaatcttccgcaatgggcgaaagcctgacggagcaacgccgcgtgagtgatgaaggtcttcggatcgtaaaactctgttattagggaagaacaaatgtgtaagtaactatgcacgtcttgacggtacctaatcagaaagccacggctaactacgtgccagcagccg…	Bacteria;Firmicutes;Bacilli;Bacillales;Staphylococcaceae;Staphylococcus;	k__Bacteria;p__Firmicutes;c__Bacilli;o__Bacillales;f__Staphylococcaceae;g__Staphylococcus;s__epidermidis;	Unclassified;	Bacteria;Firmicutes;Bacilli;Bacillales;Staphylococcaceae;Staphylococcus;	Bacteria;Firmicutes;Bacilli;Bacillales;Staphylococcaceae;Staphylococcus;
AF066_006	tataagactgggataacttcgggaaaccggagctaataccggataacatgttgaaccgcatggttcaacagtgaaagacggtcttgctgtcacttatagatggatccgcgccgcattagctagttggtaaggtaacggcttaccaaggcaacgatgcgtagccgacctgagagggtgatcggccacactggaactgagacacggtccagactcctacgggaggcagcagtagggaatcttccgcaatgggcgaaagcctgacggagcaacgccgcgtgagtgaagaaggtcttcggatcgtaaaactctgttattagggaagaacaaatgtgtaagtaactatgcacgtcttgacggtacctaatcagaaagccacggctaactacgtgccagcagccg…	Bacteria;	k__Bacteria;p__Firmicutes;c__Bacilli;o__Bacillales;f__Staphylococcaceae;g__Staphylococcus;	Unclassified;	Bacteria;Firmicutes;Bacilli;Bacillales;Staphylococcaceae;Staphylococcus;	Bacteria;Firmicutes;Bacilli;Bacillales;Staphylococcaceae;Staphylococcus;
AF066_007	tataanactgggataacttcgggaaaccggagctaataccggataatatattgaaccgcatggttcaatagtgaaagacggttttgctgtcacttatagatggatccgcgccgcattagctagttggtaaggtaacggcttaccaaggcaacgatgcgtagccgacctgagagggtgatcggccacactggaactgagacacggtccagactcctacgggaggcagcagtagggaatcttccgcaatgggcgaaagcctgacggagcaacgccgcgtgagtgatgaaggtcttcggatcgtaaaactctgttattagggaagaacaaatgtgtaagtaactatgcacgtcttgacggtacctaatcagaaagccacggctaactacgtgccagcagccg…	Bacteria;	k__Bacteria;p__Firmicutes;c__Bacilli;o__Bacillales;f__Staphylococcaceae;g__Staphylococcus;s__epidermidis;	Unclassified;	Bacteria;Firmicutes;Bacilli;Bacillales;Staphylococcaceae;Staphylococcus;	Bacteria;Firmicutes;Bacilli;Bacillales;Staphylococcaceae;Staphylococcus;
AF066_008	tataagactgggataacttcgggaaaccggagctaataccggataatatttcgaaccgcatggttcgatagtgaaagatggttttgctatcacttatagatggacccgcgccgtattagctagttggtaaggtaacggcttaccaaggcgacgatacgtagccgacctgagagggtgatcggccacactggaactgagacacggtccagactcctacgggaggcagcagtagggaatcttccgcaatgggcgaaagcctgacggagcaacgccgcgtgagtgatgaaggtcttcggatcgtaaaactctgttattagggaagaacatacgtgtaagtaactatgcacgtcttgacggtacctaatcagaaagccacggctaactacgtgccagcagccg…	Bacteria;Firmicutes;Bacilli;Bacillales;Staphylococcaceae;Staphylococcus;	k__Bacteria;p__Firmicutes;c__Bacilli;o__Bacillales;f__Staphylococcaceae;g__Staphylococcus;s__haemolyticus;	Unclassified;	Bacteria;Firmicutes;Bacilli;Bacillales;Staphylococcaceae;Staphylococcus;	Bacteria;Firmicutes;Bacilli;Bacillales;Staphylococcaceae;Staphylococcus;
AF066_009	tataagactgggataacttcgggaaaccggagctaataccggataatatattgaaccgcatggttcaatagtgaaagacggttttgctgtcacttatagatggatccgcgccgcattagctagttggtaaggtaacggcttaccaaggcaacgatgcgtagccgacctgagagggtgatcggccacactggaactgagacacggtccagactcctacgggaggcagcagtagggaatcttccgcaatgggcgaaagcctgacggagcaacgccgcgtgagtgatgaaggtcttcggatcgtaaaactctgttattagggaagaacaaatgtgtaagtaactatgcacgtcttgacggtacctaatcagaaagccacggctaactacgtgccagcagccg…	Bacteria;	k__Bacteria;p__Firmicutes;c__Bacilli;o__Bacillales;f__Staphylococcaceae;g__Staphylococcus;s__epidermidis;	Unclassified;	Bacteria;Firmicutes;Bacilli;Bacillales;Staphylococcaceae;Staphylococcus;	Bacteria;Firmicutes;Bacilli;Bacillales;Staphylococcaceae;Staphylococcus;
AF066_101	tataagactgggataacttcgggaaaccggagctaataccggataacatgttgaaccgcatggttcaacagtgaaagacggtcttgctgtcacttatagatggatccgcgccgcattagctagttggtaaggtaacggcttaccaaggcaacgatgcgtagccgacctgagagggtgatcggccacactggaactgagacacggtccagactcctacgggaggcagcagtagggaatcttccgcaatgggcgaaagcctgacggagcaacgccgcgtgagtgaagaaggtcttcggatcgtaaaactctgttattagggaagaacaaatgtgtaagtaactatgcacgtcttgacggtacctaatcagaaagccacggctaactacgtgccagcagccg…	Bacteria;	k__Bacteria;p__Firmicutes;c__Bacilli;o__Bacillales;f__Staphylococcaceae;g__Staphylococcus;	Unclassified;	Bacteria;Firmicutes;Bacilli;Bacillales;Staphylococcaceae;Staphylococcus;	Bacteria;Firmicutes;Bacilli;Bacillales;Staphylococcaceae;Staphylococcus;
AF066_102	tataagactgggataacttcgggaaaccggagctaataccggataatatattgaaccgcatggttcaatagtgaaagacggttttgctgtcacttatagatggatccgcgccgcattagctagttggtaaggtaacggcttaccaaggcaacgatgcgtagccgacctgagagggtgatcggccacactggaactgagacacggtccagactcctacgggaggcagcagtagggaatcttccgcaatgggcgaaagcctgacggagcaacgccgcgtgagtgatgaaggtcttcggatcgtaaaactctgttattagggaagaacaaatgtgtaagtaactatgcacgtcttgacggtacctaatcagaaagccacggctaactacgtgccagcagccg…	Bacteria;	k__Bacteria;p__Firmicutes;c__Bacilli;o__Bacillales;f__Staphylococcaceae;g__Staphylococcus;s__epidermidis;	Unclassified;	Bacteria;Firmicutes;Bacilli;Bacillales;Staphylococcaceae;Staphylococcus;	Bacteria;Firmicutes;Bacilli;Bacillales;Staphylococcaceae;Staphylococcus;
AF066_103	tataagactgggataacttcgggaaaccggagctaataccggataatatattgaaccgcatggttcaatagtgaaagacggttttgctgtcacttatagatggatccgcgccgcattagctagttggtaaggtaacggcttaccaaggcaacgatgcgtagccgacctgagagggtgatcggccacactggaactgagacacggtccagactcctacgggaggcagcagtagggaatcttccgcaatgggcgaaagcctgacggagcaacgccgcgtgagtgatgaaggtcttcggatcgtaaaactctgttattagggaagaacaaatgtgtaagtaactatgcacgtcttgacggtacctaatcagaaagccacggctaactacgtgccagcagccg…	Bacteria;	k__Bacteria;p__Firmicutes;c__Bacilli;o__Bacillales;f__Staphylococcaceae;g__Staphylococcus;s__epidermidis;	Unclassified;	Bacteria;Firmicutes;Bacilli;Bacillales;Staphylococcaceae;Staphylococcus;	Bacteria;Firmicutes;Bacilli;Bacillales;Staphylococcaceae;Staphylococcus;
AF066_104	tatggtactgggataacttcgggaaaccggagctaataccggataacatgttgaaccgcatggttcaacagtgaaagacggtcttgctgtcacttatagatggatccgcgccgcattagctagttggtaaggtaacggcttaccaaggcaacgatgcgtagccgacctgagagggtgatcggccacactggaactgagacacggtccagactcctacgggaggcagcagtagggaatcttccgcaatgggcgaaagcctgacggagcaacgccgcgtgagtgaagaaggtcttcggatcgtaaaactctgttattagggaagaacaaatgtgtaagtaactatgcacgtcttgacggtacctaatcagaaagccacggctaactacgtgccagcagccg…	Bacteria;	k__Bacteria;p__Firmicutes;c__Bacilli;o__Bacillales;f__Staphylococcaceae;g__Staphylococcus;	Unclassified;	Bacteria;Firmicutes;Bacilli;Bacillales;Staphylococcaceae;Staphylococcus;	Bacteria;Firmicutes;Bacilli;Bacillales;Staphylococcaceae;Staphylococcus;
AF066_105	tgtaagactgggataacttcgggaaaccgaagctaataccggataggatcttctccttcatgggagatgattgaaagatggtttcggctatcacttacagatgggcccgcggtgcattagctagttggtgaggtaacggctcaccaaggcaacgatgcatagccgacctgagagggtgatcggccacactgggactgagacacggcccagactcctacgggaggcagcagtagggaatcttccgcaatggacgaaagtctgacggagcaacgccgcgtgagtgatgaaggctttcgggtcgtaaaactctgttgttagggaagaacaagtacaagagtaactgcttgtaccttgacggtacctaaccagaaagccacggctaactacgtgccagcagcc…	Bacteria;Firmicutes;Bacilli;Bacillales;Bacillaceae;Bacillus;	k__Bacteria;p__Firmicutes;c__Bacilli;o__Bacillales;f__Bacillaceae;g__Bacillus;s__flexus;	Unclassified;	Bacteria;Firmicutes;Bacilli;Bacillales;Bacillaceae 1;Bacillus;	Bacteria;Firmicutes;Bacilli;Bacillales;Bacillaceae;Bacillus;
AF066_106	tataagactgggataacttcgggaaaccggagctaataccggataatatattgaaccgcatggttcaatagtgaaagacggttttgctgtcacttatagatggatccgcgccgcattagctagttggtaaggtaacggcttaccaaggcaacgatgcgtagccgacctgagagggtgatcggccacactggaactgagacacggtccagactcctacgggaggcagcagtagggaatcttccgcaatgggcgaaagcctgacggagcaacgccgcgtgagtgatgaaggtcttcggatcgtaaaactctgttattagggaagaacaaatgtgtaagtaactatgcacgtcttgacggtacctaatcagaaagccacggctaactacgtgccagcagccg…	Bacteria;	k__Bacteria;p__Firmicutes;c__Bacilli;o__Bacillales;f__Staphylococcaceae;g__Staphylococcus;s__epidermidis;	Unclassified;	Bacteria;Firmicutes;Bacilli;Bacillales;Staphylococcaceae;Staphylococcus;	Bacteria;Firmicutes;Bacilli;Bacillales;Staphylococcaceae;Staphylococcus;
AF066_107	tataagactgggataacttcgggaaaccggagctaataccggataatatttcgaaccgcatggttcgatagtgaaagatggttttgctatcacttatagatggacccgcgccgtattagctagttggtaaggtaacggcttaccaaggcgacgatacgtagccgacctgagagggtgatcggccacactggaactgagacacggtccagactcctacgggaggcagcagtagggaatcttccgcaatgggcgaaagcctgacggagcaacgccgcgtgagtgatgaaggtcttcggatcgtaaaactctgttattagggaagaacatacgtgtaagtaactatgcacgtcttgacggtacctaatcagaaagccacggctaactacgtgccagcagccg…	Bacteria;Firmicutes;Bacilli;Bacillales;Staphylococcaceae;Staphylococcus;	k__Bacteria;p__Firmicutes;c__Bacilli;o__Bacillales;f__Staphylococcaceae;g__Staphylococcus;s__haemolyticus;	Unclassified;	Bacteria;Firmicutes;Bacilli;Bacillales;Staphylococcaceae;Staphylococcus;	Bacteria;Firmicutes;Bacilli;Bacillales;Staphylococcaceae;Staphylococcus;
AF066_108	tataagactgggataacttcgggaaaccggagctaataccggataatatattgaaccgcatggttcaatagtgaaagacggttttgctgtcacttatagatggatccgcgccgcattagctagttggtaaggtaacggcttaccaaggcaacgatgcgtagccgacctgagagggtgatcggccacactggaactgagacacggtccagactcctacgggaggcagcagtagggaatcttccgcaatgggcgaaagcctgacggagcaacgccgcgtgagtgatgaaggtcttcggatcgtaaaactctgttattagggaagaacaaatgtgtaagtaactatgcacgtcttgacggtacctaatcagaaagccacggctaactacgtgccagcagccg…	Bacteria;	k__Bacteria;p__Firmicutes;c__Bacilli;o__Bacillales;f__Staphylococcaceae;g__Staphylococcus;s__epidermidis;	Unclassified;	Bacteria;Firmicutes;Bacilli;Bacillales;Staphylococcaceae;Staphylococcus;	Bacteria;Firmicutes;Bacilli;Bacillales;Staphylococcaceae;Staphylococcus;
AF066_109	tataagcgggggataacattcggaaacgggtgctaataccgcataatatcttcttccgcatggaagaagattgaaagacggctctgctgtcacttatagatgaccttgcggtgcattagttagttggtggggtaatggcctaccaagacgatgatgcatagccgacctgagagggtgatcggccacattgggactgagacacggcccaaactcctacgggaggcagcagtagggaatcttccgcaatgggcgaaagcctgacggagcaatgccgcgtgagtgaagaaggccttcgggtcgtaaaactctgttataagagaagaacaaattgtagagtaactgctacagtcttgacggtatcttatcagaaagccacggctaactacgtgccagcagccg…	Bacteria;	k__Bacteria;p__Firmicutes;c__Bacilli;o__Lactobacillales;f__Aerococcaceae;g__Aerococcus;	Unclassified;	Bacteria;Firmicutes;Bacilli;Lactobacillales;Aerococcaceae;Aerococcus;	Bacteria;Firmicutes;Bacilli;Lactobacillales;Aerococcaceae;Aerococcus;
AF066_201	cttgactttgggataacttcaggaaactggggctaataccggataggagctcctgctgcatggtgggggttggaaagtttcggcggttggggatggactcgcggcttatcagcttgttggtggggtagtggcttaccaaggctttgacgggtagccggcctgagagggtgaccggccacattgggactgagatacggcccagactcctacgggaggcagcagtggggaatattgcacaatgggcggaagcctgatgcagcaacgccgcgtgcgggatgacggccttcgggttgtaaaccgctttcgcctgtgacgaagcgtgagtgacggtaatgggtaaagaagcaccggctaactacgtgccagcagccgcggtgatacgtagggtgcgagcgttgt…	Bacteria;	k__Bacteria;p__Actinobacteria;c__Actinobacteria;o__Actinomycetales;f__Propionibacteriaceae;g__Propionibacterium;s__acnes;	Unclassified;	Bacteria;"Actinobacteria";Actinobacteria;Actinobacteridae;Actinomycetales;Propionibacterineae;Propionibacteriaceae;Propionibacterium;	Bacteria;Actinobacteria;Actinobacteria;Propionibacteriales;Propionibacteriaceae;Cutibacterium;
AF066_202	tatggtactgggataacttcgggaaaccggagctaataccggataatatattgaaccgcatggttcaatagtgaaagacggttttgctgtcacttatagatggatccgcgccgcattagctagttggtaaggtaacggcttaccaaggcaacgatgcgtagccgacctgagagggtgatcggccacactggaactgagacacggtccagactcctacgggaggcagcagtagggaatcttccgcaatgggcgaaagcctgacggagcaacgccgcgtgagtgatgaaggtcttcggatcgtaaaactctgttattagggaagaacaaatgtgtaagtaactatgcacgtcttgacggtacctaatcagaaagccacggctaactacgtgccagcagccg…	Bacteria;	k__Bacteria;p__Firmicutes;c__Bacilli;o__Bacillales;f__Staphylococcaceae;g__Staphylococcus;s__epidermidis;	Unclassified;	Bacteria;Firmicutes;Bacilli;Bacillales;Staphylococcaceae;Staphylococcus;	Bacteria;Firmicutes;Bacilli;Bacillales;Staphylococcaceae;Staphylococcus;
AF066_203	tataagactgggataacttcgggaaaccggagctaataccggataacatgttgaaccgcatggttcaacagtgaaagacggtnttgctgtcacttatagatggatccgcgtcgcattagctagttggtaaggtaacggcttaccaaggcaacgatgcgtagccgacctgagagggtgatcggccacactggaactgagacacggtccagactcctacgggaggcagcagtagggaatcttccgcaatgggcgaaagcctgacggagcaacgccgcgtgagtgaagaaggtcttcggatcgtaaaactctgttattagggaagaacaaatgtgtaagtaactatgcacgtcttgacggtacctaatcagaaagccacggctaactacgtgccagcagccg…	Bacteria;	k__Bacteria;p__Firmicutes;c__Bacilli;o__Bacillales;f__Staphylococcaceae;g__Staphylococcus;	Unclassified;	Bacteria;Firmicutes;Bacilli;Bacillales;Staphylococcaceae;Staphylococcus;	Bacteria;Firmicutes;Bacilli;Bacillales;Staphylococcaceae;Staphylococcus;
AF066_204	tataagactgggataacttcgggaaaccggagctaataccggataacatgttgaaccgcatggttcaacagtgaaagacggtnttgctgtcacttatagatggatccgcgccgcattagctagttggtaaggtaacggcttaccaaggcaacgatgcgtagccgacctgagagggtgatcggccacactggaactgagacacggtccagactcctacgggaggcagcagtagggaatcttccgcaatgggcgaaagcctgacggagcaacgccgcgtgagtgaagaaggtcttcggatcgtaaaactctgttattagggaagaacaaatgtgtaagtaactatgcacgtcttgacggtacctaatcagaaagccacggctaactacgtgccagcagccg…	Bacteria;	k__Bacteria;p__Firmicutes;c__Bacilli;o__Bacillales;f__Staphylococcaceae;g__Staphylococcus;	Unclassified;	Bacteria;Firmicutes;Bacilli;Bacillales;Staphylococcaceae;Staphylococcus;	Bacteria;Firmicutes;Bacilli;Bacillales;Staphylococcaceae;Staphylococcus;
AF066_401	aaggtagatcttaacccggtaaacttagatcttaacagggtgcaacttgtccccgcatgggggtgtgtggaaagggttttactggtcttggatgggctcacggcctatcagcttgttggtgaggtaatggctcaccaaggcgacgacgggtagccggcctgagagggtgaccggccacactgggactgagacacggcccagactcctacgggaggcagcagtggggaatattgcacaatgggcggaagcctgatgcagcgacgccgcgtgagggatgacggccttcgggttgtaaacctctttcagcagggaagaagccacaagtgacggtacctgcagaagaagcgccggctaactacgtgccagcagccgcggtaatacgtagggcgcaagcgttgt…	Bacteria;	k__Bacteria;p__Actinobacteria;c__Actinobacteria;o__Actinomycetales;f__Micrococcaceae;g__Kocuria;s__palustris;	Bacteria;Actinobacteria;Actinobacteria;Micrococcales;Micrococcaceae;Kocuria;	Bacteria;"Actinobacteria";Actinobacteria;Actinobacteridae;Actinomycetales;Micrococcineae;Micrococcaceae;Kocuria;	Bacteria;Actinobacteria;Actinobacteria;Micrococcales;Micrococcaceae;Kocuria;
AF066_402	tataagactgggataacttcgggaaaccggagctaataccggataacatgttgaaccgcatggttcaacagtgaaagacggtcttgctgtcacttatagatggatccgcgccgcattagctagttggtaaggtaacggcttaccaaggcaacgatgcgtagccgacctgagagggtgatcggccacactggaactgagacacggtccagactcctacgggaggcagcagtagggaatcttccgcaatgggcgaaagcctgacggagcaacgccgcgtgagtgaagaaggtcttcggatcgtaaaactctgttattagggaagaacaaatgtgtaagtaactatgcacgtcttgacggtacctaatcagaaagccacggctaactacgtgccagcagccg…	Bacteria;	k__Bacteria;p__Firmicutes;c__Bacilli;o__Bacillales;f__Staphylococcaceae;g__Staphylococcus;	Unclassified;	Bacteria;Firmicutes;Bacilli;Bacillales;Staphylococcaceae;Staphylococcus;	Bacteria;Firmicutes;Bacilli;Bacillales;Staphylococcaceae;Staphylococcus;
AF066_403	tataagactgggataacttcgggaaaccggagctaataccggataacatgttgaaccgcatggttcaacagtgaaagacggtcttgctgtcacttatagatggatccgcgccgcattagctagttggtaaggtaacggcttaccaaggcaacgatgcgtagccgacctgagagggtgatcggccacactggaactgagacacggtccagactcctacgggaggcagcagtagggaatcttccgcaatgggcgaaagcctgacggagcaacgccgcgtgagtgaagaaggtcttcggatcgtaaaactctgttattagggaagaacaaatgtgtaagtaactatgcacgtcttgacggtacctaatcagaaagccacggctaactacgtgccagcagccg…	Bacteria;	k__Bacteria;p__Firmicutes;c__Bacilli;o__Bacillales;f__Staphylococcaceae;g__Staphylococcus;	Unclassified;	Bacteria;Firmicutes;Bacilli;Bacillales;Staphylococcaceae;Staphylococcus;	Bacteria;Firmicutes;Bacilli;Bacillales;Staphylococcaceae;Staphylococcus;
AF066_406	cttgactctgggataagcccgggaaactgggtctaataccggataggagcgcctgtcgcatgacgggtgctggaaagatttttcggtcatggatggactcgcggcctatcagcttgttggtgaggtaacggctcaccaaggcgacgacgggtagccggcctgagagggtgaccggccacactgggactgagacacggcccagactcctacgggaggcagcagtggggaatattgcacaatgggcgaaagcctgatgcagcgacgccgcgtgagggatgacggccttcgggttgtaaacctctttcagcagggaagaagcgaaagtgacggtacctgcagaagaagcaccggctaactacgtgccagcagccgcggtaatacgtagggtgcgagcgttat…	Bacteria;Actinobacteria;Micrococcales;Micrococcaceae;Micrococcus;	k__Bacteria;p__Actinobacteria;c__Actinobacteria;o__Actinomycetales;f__Micrococcaceae;g__Micrococcus;	Bacteria;Actinobacteria;Actinobacteria;Micrococcales;Micrococcaceae;Micrococcus;	Bacteria;"Actinobacteria";Actinobacteria;Actinobacteridae;Actinomycetales;Micrococcineae;Micrococcaceae;Micrococcus;	Bacteria;Actinobacteria;Actinobacteria;Micrococcales;Micrococcaceae;Micrococcus;
AF066_407	cttgactctgggataagcctgggaaactgggtctaataccggataggaacgtccaccgcatggtggttgttggaaagatttatcggtcatggatggactcgcggcctatcagcttgttggtgaggtaatggctcaccaaggcgacgacgggtagccggcctgagagggtgaccggccacactgggactgagacacggcccagactcctacgggaggcagcagtggggaatattgcacaatgggcgaaagcctgatgcagcgacgccgcgtgagggatgacggccttcgggttgtaaacctctttcagtagggaagaagcgaaagtgacggtacctgcagaagaagcaccggctaactacgtgccagcagccgcggtaatacgtagggtgcgagcgttat…	Bacteria;Actinobacteria;	k__Bacteria;p__Actinobacteria;c__Actinobacteria;o__Actinomycetales;f__Micrococcaceae;g__Micrococcus;	Bacteria;Actinobacteria;Actinobacteria;Micrococcales;Micrococcaceae;Micrococcus;	Bacteria;"Actinobacteria";Actinobacteria;Actinobacteridae;Actinomycetales;Micrococcineae;Micrococcaceae;Micrococcus;	Bacteria;Actinobacteria;Actinobacteria;Micrococcales;Micrococcaceae;Micrococcus;
AF066_408	aatcctgacnaggtagatcttaaccaggtagcggtaaatcttaacaatgtaaccttgaaccgtatggtttggggtggaaagtttttcggtctgggatggactcgcggcctatcagcttgttggtgaggtaatggctcaccaaggcgtcgacgggtagccggcctgagagggtgaccggccacactgggactgagacacggcccagactcctacgggaggcagcagtggggaatattgcacaatgggcgcaagcctgatgcagcaacgccgcgtgcgggatgacggccttcgggttgtaaaccgcttttagtaaggaagaagggaagcttgcttcttgacggtacttgcagaaaaaggaccggctaactacgtgccagcagccgcggtaatacgtagggt…	Bacteria;	k__Bacteria;p__Actinobacteria;c__Actinobacteria;o__Actinomycetales;f__Microbacteriaceae;g__Agromyces;	Bacteria;Actinobacteria;Actinobacteria;Micrococcales;Microbacteriaceae;Agromyces;	Bacteria;"Actinobacteria";Actinobacteria;Actinobacteridae;Actinomycetales;Micrococcineae;Microbacteriaceae;Agromyces;	Bacteria;Actinobacteria;Actinobacteria;Micrococcales;Microbacteriaceae;Agromyces;
AF066_412	tataagactgggataacttcgggaaaccggagctaataccggataatatattgaaccgcatggttcaatagtgaaagacggttttgctgtcacttatagatggatccgcgccgcattagctagttggtaaggtaacggcttaccaaggcaacgatgcgtagccgacctgagagggtgatcggccacactggaactgagacacggtccagactcctacgggaggcagcagtagggaatcttccgcaatgggcgaaagcctgacggagcaacgccgcgtgagtgatgaaggtcttcggatcgtaaaactctgttattagggaagaacaaatgtgtaagtaactatgcacgtcttgacggtacctaatcagaaagccacggctaactacgtgccagcagccg…	Bacteria;	k__Bacteria;p__Firmicutes;c__Bacilli;o__Bacillales;f__Staphylococcaceae;g__Staphylococcus;s__epidermidis;	Unclassified;	Bacteria;Firmicutes;Bacilli;Bacillales;Staphylococcaceae;Staphylococcus;	Bacteria;Firmicutes;Bacilli;Bacillales;Staphylococcaceae;Staphylococcus;
AF066_413	tataagactgggataacttcgggaaaccggagctaataccggataatatattgaaccgcatggttcaatagtgaaagacggttttgctgtcacttatagatggatccgcgccgcattagctagttggtaaggtaacggcttaccaaggcaacgatgcgtagccgacctgagagggtgatcggccacactggaactgagacacggtccagactcctacgggaggcagcagtagggaatcttccgcaatgggcgaaagcctgacggagcaacgccgcgtgagtgatgaaggtcttcggatcgtaaaactctgttattagggaagaacaaatgtgtaagtaactatgcacgtcttgacggtacctaatcagaaagccacggctaactacgtgccagcagccg…	Bacteria;	k__Bacteria;p__Firmicutes;c__Bacilli;o__Bacillales;f__Staphylococcaceae;g__Staphylococcus;s__epidermidis;	Unclassified;	Bacteria;Firmicutes;Bacilli;Bacillales;Staphylococcaceae;Staphylococcus;	Bacteria;Firmicutes;Bacilli;Bacillales;Staphylococcaceae;Staphylococcus;
AF066_601	tataagactgggataacttcgggaaaccggagctaataccggataatatttcgaaccgcatggttcgatagtgaaagatggctttgctatcacttatagatggacctgcgccgtattagctagttggtaaggtaacggcttaccaaggcaacgatacgtagccgacctgagagggtgatcggccacactggaactgagacacggtccagactcctacgggaggcagcagtagggaatcttccgcaatgggcgaaagcctgacggagcaacgccgcgtgagtgatgaaggtcttcggatcgtaaaactctgttattagggaagaacaaacgtgtaagtaactgtgcacgtcttgacggtacctaatcagaaagccacggctaactacgtgccagcagccg…	Bacteria;	k__Bacteria;p__Firmicutes;c__Bacilli;o__Bacillales;f__Staphylococcaceae;g__Staphylococcus;	Unclassified;	Bacteria;Firmicutes;Bacilli;Bacillales;Staphylococcaceae;Staphylococcus;	Bacteria;Firmicutes;Bacilli;Bacillales;Staphylococcaceae;Staphylococcus;
AF067_001	tataanactgggataacttcgggaaaccggagctaataccggataatatattgaaccgcatggttcaatagtgaaagacggttttgctgtcacttatagatggatccgcgccgcattagctagttggtaaggtaacggcttaccaaggcaacgatgcgtagccgacctgagagggtgatcggccacactggaactgagacacggtccagactcctacgggaggcagcagtagggaatcttccgcaatgggcgaaagcctgacggagcaacgccgcgtgagtgatgaaggtcttcggatcgtaaaactctgttattagggaagaacaaatgtgtaagtaactatgcacgtcttgacggtacctaatcagaaagccacggctaactacgtgccagcagccg…	Bacteria;	k__Bacteria;p__Firmicutes;c__Bacilli;o__Bacillales;f__Staphylococcaceae;g__Staphylococcus;s__epidermidis;	Unclassified;	Bacteria;Firmicutes;Bacilli;Bacillales;Staphylococcaceae;Staphylococcus;	Bacteria;Firmicutes;Bacilli;Bacillales;Staphylococcaceae;Staphylococcus;
AF067_002	cttaactctgggataagcctgggaaactgggtctaataccggataggagcgtccaccgcatggtgggtgttggaaagatttatcggttttggatggactcgcggcctatcagcttgttggtgaggtaatggctcaccaaggcgacgacgggtagccggcctgagagggtgaccggccacactgggactgagacacggcccagactcctacgggaggcagcagtggggaatattgcacaatgggcgcaagcctgatgcagcgacgccgcgtgagggatgacggccttcgggttgtaaacctctttcagtagggaagaagcgaaagtgacggtacctgcagaagaagcaccggctaactacgtgccagcagccgcggtaatacgtagggtgcgagcgttat…	Bacteria;Actinobacteria;Micrococcales;Micrococcaceae;	k__Bacteria;p__Actinobacteria;c__Actinobacteria;o__Actinomycetales;f__Micrococcaceae;g__Micrococcus;s__luteus;	Unclassified;	Bacteria;"Actinobacteria";Actinobacteria;Actinobacteridae;Actinomycetales;Micrococcineae;Micrococcaceae;Micrococcus;	Bacteria;Actinobacteria;Actinobacteria;Micrococcales;Micrococcaceae;Micrococcus;
AF067_003	tataanactgggataacttcgggaaaccggagctaataccggataatatttcgaaccgcatggttcgatagtgaaagatggctttgctatcacttatagatggacctgcgccgtattagctagttggtaaggtaacggcttaccaaggcaacgatacgtagccgacctgagagggtgatcggccacactggaactgagacacggtccagactcctacgggaggcagcagtagggaatcttccgcaatgggcgaaagcctgacggagcaacgccgcgtgagtgatgaaggtcttcggatcgtaaaactctgttattagggaagaacaaacgtgtaagtaactgtgcacgtcttgacggtacctaatcagaaagccacggctaactacgtgccagcagccg…	Bacteria;	k__Bacteria;p__Firmicutes;c__Bacilli;o__Bacillales;f__Staphylococcaceae;g__Staphylococcus;	Unclassified;	Bacteria;Firmicutes;Bacilli;Bacillales;Staphylococcaceae;Staphylococcus;	Bacteria;Firmicutes;Bacilli;Bacillales;Staphylococcaceae;Staphylococcus;
AF067_004	tataagactgggataacttcgggaaaccggagctaataccggataatatattgaaccgcatggttcaatagtgaaagacggttttgctgtcacttatagatggatccgcgccgcattagctagttggtaaggtaacggcttaccaaggcaacgatgcgtagccgacctgagagggtgatcggccacactggaactgagacacggtccagactcctacgggaggcagcagtagggaatcttccgcaatgggcgaaagcctgacggagcaacgccgcgtgagtgatgaaggtcttcggatcgtaaaactctgttattagggaagaacaaatgtgtaagtaactatgcacgtcttgacggtacctaatcagaaagccacggctaactacgtgccagcagccg…	Bacteria;Firmicutes;Bacilli;Bacillales;Staphylococcaceae;Staphylococcus;	k__Bacteria;p__Firmicutes;c__Bacilli;o__Bacillales;f__Staphylococcaceae;g__Staphylococcus;s__epidermidis;	Unclassified;	Bacteria;Firmicutes;Bacilli;Bacillales;Staphylococcaceae;Staphylococcus;	Bacteria;Firmicutes;Bacilli;Bacillales;Staphylococcaceae;Staphylococcus;
AF067_005	tataagactgggataacttcgggaaaccggagctaataccggataacatgttgaaccgcatggttcaacagtgaaagacggtcttgctgtcacttatagatggatccgcgccgcattagctagttggtaaggtaacggcttaccaaggcaacgatgcgtagccgacctgagagggtgatcggccacactggaactgagacacggtccagactcctacgggaggcagcagtagggaatcttccgcaatgggcgaaagcctgacggagcaacgccgcgtgagtgatgaaggtcttcggatcgtaaaactctgttattagggaagaacaaatgtgtaagtaactatgcacgtcttgacggtacctaatcagaaagccacggctaactacgtgccagcagccg…	Bacteria;	k__Bacteria;p__Firmicutes;c__Bacilli;o__Bacillales;f__Staphylococcaceae;g__Staphylococcus;	Bacteria;Firmicutes;Bacilli;Bacillales;Staphylococcaceae;Staphylococcus;	Bacteria;Firmicutes;Bacilli;Bacillales;Staphylococcaceae;Staphylococcus;	Bacteria;Firmicutes;Bacilli;Bacillales;Staphylococcaceae;Staphylococcus;
AF067_006	tataagactgggataacttcgggaaaccggagctaataccggataatatattgaaccgcatggttcaatagtgaaagacggttttgctgtcacttatagatggatccgcgccgcattagctagttggtaaggtaacggcttaccaaggcaacgatgcgtagccgacctgagagggtgatcggccacactggaactgagacacggtccagactcctacgggaggcagcagtagggaatcttccgcaatgggcgaaagcctgacggagcaacgccgcgtgagtgatgaaggtcttcggatcgtaaaactctgttattagggaagaacaaatgtgtaagtaactatgcacgtcttgacggtacctaatcagaaagccacggctaactacgtgccagcagccg…	Bacteria;	k__Bacteria;p__Firmicutes;c__Bacilli;o__Bacillales;f__Staphylococcaceae;g__Staphylococcus;s__epidermidis;	Unclassified;	Bacteria;Firmicutes;Bacilli;Bacillales;Staphylococcaceae;Staphylococcus;	Bacteria;Firmicutes;Bacilli;Bacillales;Staphylococcaceae;Staphylococcus;
AF067_009	tataagactgggataacttcgggaaaccggagctaataccggataatatttcgaaccgcatggttcgatagtgaaagatggttttgctatcacttatagatggacccgcgccgtattagctagttggtaaggtaacggcttaccaaggcgacgatacgtagccgacctgagagggtgatcggccacactggaactgagacacggtccagactcctacgggaggcagcagtagggaatcttccgcaatgggcgaaagcctgacggagcaacgccgcgtgagtgatgaaggtcttcggatcgtaaaactctgttattagggaagaacatacgtgtaagtaactatgcacgtcttgacggtacctaatcagaaagccacggctaactacgtgccagcagccg…	Bacteria;Firmicutes;Bacilli;Bacillales;Staphylococcaceae;Staphylococcus;	k__Bacteria;p__Firmicutes;c__Bacilli;o__Bacillales;f__Staphylococcaceae;g__Staphylococcus;s__haemolyticus;	Unclassified;	Bacteria;Firmicutes;Bacilli;Bacillales;Staphylococcaceae;Staphylococcus;	Bacteria;Firmicutes;Bacilli;Bacillales;Staphylococcaceae;Staphylococcus;
AF067_010	cttaactctgggataagcctgggaaactgggtctaataccggataggagcgtccaccgcatggtgggtgttggaaagatttatcggttttggatggactcgcggcctatcagcttgttggtgaggtaatggctcaccaaggcgacgacgggtagccggcctgagagggtgaccggccacactgggactgagacacggcccagactcctacgggaggcagcagtggggaatattgcacaatgggcgcaagcctgatgcagcgacgccgcgtgagggatgacggccttcgggttgtaaacctctttcagtagggaagaagcgaaagtgacggtacctgcagaagaagcaccggctaactacgtgccagcagccgcggtaatacgtagggtgcgagcgttat…	Bacteria;Actinobacteria;Micrococcales;Micrococcaceae;	k__Bacteria;p__Actinobacteria;c__Actinobacteria;o__Actinomycetales;f__Micrococcaceae;g__Micrococcus;s__luteus;	Unclassified;	Bacteria;"Actinobacteria";Actinobacteria;Actinobacteridae;Actinomycetales;Micrococcineae;Micrococcaceae;Micrococcus;	Bacteria;Actinobacteria;Actinobacteria;Micrococcales;Micrococcaceae;Micrococcus;
AF067_011	cttnaactctgggataagcctgggaaactgggtctaataccggataggagcgtccaccgcatggtgggtgttggaaagatttatcggttttggatggactcgcggcctatcagcttgttggtgaggtaatggctcaccaaggcgacgacgggtagccggcctgagagggtgaccggccacactgggactgagacacggcccagactcctacgggaggcagcagtggggaatattgcacaatgggcgcaagcctgatgcagcgacgccgcgtgagggatgacggccttcgggttgtaaacctctttcagtagggaagaagcgaaagtgacggtacctgcagaagaagcaccggctaactacgtgccagcagccgcggtaatacgtagggtgcgagcgtta…	Unclassified;	k__Bacteria;p__Actinobacteria;c__Actinobacteria;o__Actinomycetales;f__Micrococcaceae;g__Micrococcus;s__luteus;	Bacteria;Actinobacteria;Actinobacteria;Micrococcales;Micrococcaceae;Micrococcus;	Bacteria;"Actinobacteria";Actinobacteria;Actinobacteridae;Actinomycetales;Micrococcineae;Micrococcaceae;Micrococcus;	Bacteria;Actinobacteria;Actinobacteria;Micrococcales;Micrococcaceae;Micrococcus;
AF067_012	tgtaagactgggataacttcgggaaaccggagctaataccggataatgcacagcctctcatgaggctatgctgaaagatggtttcggctatcacttacagatgggcccgcggcgcattagctagttggtgaggtaacggctcaccaaggcaacgatgcgtagccgacctgagagggtgatcggccacactgggactgagacacggcccagactcctacgggaggcagcagtagggaatcttccgcaatggacgaaagtctgacggagcaacgccgcgtgagtgatgaaggttttcggatcgtaaaactctgttgtcagggaagaacaagtgccggagtaactgccggcaccttgacggtacctgaccagaaagccacggctaactacgtgccagcagcc…	Bacteria;Firmicutes;Bacilli;Bacillales;Bacillaceae;Bacillus;	k__Bacteria;p__Firmicutes;c__Bacilli;o__Bacillales;f__Bacillaceae;g__Bacillus;	Unclassified;	Bacteria;Firmicutes;Bacilli;Bacillales;Bacillaceae 1;Bacillus;	Bacteria;Firmicutes;Bacilli;Bacillales;Bacillaceae;Bacillus;
AF068_002	tctttgactgggataactaccggaaacggtagctaataccggataattcctttgttcacatggacgaaggatgaaaggcggagcaatctgctacaaggagatgggcctgcggcgcattagctagttggtggggtaacggctcaccaaggcgacgatgcgtagccgacctgagagggtgaacggccacactgggactgagacacggcccagactcctacgggaggcagcagtagggaatcttccgcaatgggcgaaagcctgacggagcaacgccgcgtgagtgatgaaggttttcggatcgtaaagctctgttgccagggaagaacgtccggtagagtaactgctaccggagtgacggtacctgagaagaaagccccggctaactacgtgccagcagcc…	Bacteria;Firmicutes;Bacilli;Bacillales;Paenibacillaceae;Paenibacillus;	Unclassified;	Unclassified;	Bacteria;Firmicutes;Bacilli;Bacillales;Paenibacillaceae 1;Paenibacillus;	Bacteria;Firmicutes;Bacilli;Bacillales;Paenibacillaceae;Paenibacillus;
AF068_003	tatggnactgggataacttcgggaaaccggagctaataccggataatatattgaaccgcatggttcaatagtgaaagacggttttgctgtcacttatagatggatccgcgccgcattagctagttggtaaggtaacggcttaccaaggcaacgatgcgtagccgacctgagagggtgatcggccacactggaactgagacacggtccagactcctacgggaggcagcagtagggaatcttccgcaatgggcgaaagcctgacggagcaacgccgcgtgagtgatgaaggtcttcggatcgtaaaactctgttattagggaagaacaaatgtgtaagtaactatgcacgtcttgacggtacctaatcagaaagccacggctaactacgtgccagcagccg…	Bacteria;	k__Bacteria;p__Firmicutes;c__Bacilli;o__Bacillales;f__Staphylococcaceae;g__Staphylococcus;s__epidermidis;	Unclassified;	Bacteria;Firmicutes;Bacilli;Bacillales;Staphylococcaceae;Staphylococcus;	Bacteria;Firmicutes;Bacilli;Bacillales;Staphylococcaceae;Staphylococcus;
AF068_004	cttnaactctgggataagcctgggaaactgggtctaataccggataggagcgcctaccgcatggtgggtgttggaaagatttatcggttttggatggactcgcggcctatcagcttgttggtgaggtaatggctcaccaaggcgacgacgggtagccggcctgagagggtgaccggccacactgggactgagacacggcccagactcctacgggaggcagcagtggggaatattgcacaatgggcgcaagcctgatgcagcgacgccgcgtgagggatgacggccttcgggttgtaaacctctttcagtagggaagaagcgaaagtgacggtacctgcagaagaagcaccggctaactacgtgccagcagccgcggtaatacgtagggtgcgagcgtta…	Bacteria;Actinobacteria;Micrococcales;Micrococcaceae;Micrococcus;	k__Bacteria;p__Actinobacteria;c__Actinobacteria;o__Actinomycetales;f__Micrococcaceae;g__Micrococcus;s__luteus;	Unclassified;	Bacteria;"Actinobacteria";Actinobacteria;Actinobacteridae;Actinomycetales;Micrococcineae;Micrococcaceae;Micrococcus;	Bacteria;Actinobacteria;Actinobacteria;Micrococcales;Micrococcaceae;Micrococcus;
AF068_005	tatggtactggganacttcgggaaaccggagctaataccggataatatttcgaaccgcatggttcgatagtgaaagatggctttgctatcacttatagatggacctgcgccgtattagctagttggtaaggtaacggcttaccaaggcaacgatacgtagccgacctgagagggtgatcggccacactggaactgagacacggtccagactcctacgggaggcagcagtagggaatcttccgcaatgggcgaaagcctgacggagcaacgccgcgtgagtgatgaaggtcttcggatcgtaaaactctgttattagggaagaacaaacgtgtaagtaactgtgcacgtcttgacggtacctaatcagaaagccacggctaactacgtgccagcagccgc…	Bacteria;	k__Bacteria;p__Firmicutes;c__Bacilli;o__Bacillales;f__Staphylococcaceae;g__Staphylococcus;	Unclassified;	Bacteria;Firmicutes;Bacilli;Bacillales;Staphylococcaceae;Staphylococcus;	Bacteria;Firmicutes;Bacilli;Bacillales;Staphylococcaceae;Staphylococcus;
AF068_006	tataagactgggataacttcgggaaaccggagctaataccggataatatattgaaccgcatggttcaatagtgaaagacggttttgctgtcacttatagatggatccgcgccgcattagctagttggtaaggtaacggcttaccaaggcaacgatgcgtagccgacctgagagggtgatcggccacactggaactgagacacggtccagactcctacgggaggcagcagtagggaatcttccgcaatgggcgaaagcctgacggagcaacgccgcgtgagtgatgaaggtcttcggatcgtaaaactctgttattagggaagaacaaatgtgtaagtaactatgcacgtcttgacggtacctaatcagaaagccacggctaactacgtgccagcagccg…	Bacteria;	k__Bacteria;p__Firmicutes;c__Bacilli;o__Bacillales;f__Staphylococcaceae;g__Staphylococcus;s__epidermidis;	Unclassified;	Bacteria;Firmicutes;Bacilli;Bacillales;Staphylococcaceae;Staphylococcus;	Bacteria;Firmicutes;Bacilli;Bacillales;Staphylococcaceae;Staphylococcus;
AF068_007	tataagactgggataacttcgggaaaccggagctaataccggataatatattgaaccgcatggttcaatagtgaaagacggttttgctgtcacttatagatggatccgcgccgcattagctagttggtaaggtaacggcttaccaaggcaacgatgcgtagccgacctgagagggtgatcggccacactggaactgagacacggtccagactcctacgggaggcagcagtagggaatcttccgcaatgggcgaaagcctgacggagcaacgccgcgtgagtgatgaaggtcttcggatcgtaaaactctgttattagggaagaacaaatgtgtaagtaactatgcacgtcttgacggtacctaatcagaaagccacggctaactacgtgccagcagccg…	Bacteria;	k__Bacteria;p__Firmicutes;c__Bacilli;o__Bacillales;f__Staphylococcaceae;g__Staphylococcus;s__epidermidis;	Unclassified;	Bacteria;Firmicutes;Bacilli;Bacillales;Staphylococcaceae;Staphylococcus;	Bacteria;Firmicutes;Bacilli;Bacillales;Staphylococcaceae;Staphylococcus;
AF068_008	cctcactctgggataagcctgggaaactgggtctaatactggatacgaccgatctccgcatggagtgttggtggaaagtttttgtggtgggggatggactcgcggcctatcagcttgttggtggggtaatggcctaccaaggcgacgacgggtagccggcctgagagggcgaccggccacactgggactgagacacggcccagactcctacgggaggcagcagtggggaatattgcacaatgggcgaaagcctgatgcagcgacgccgcgtgagggatgacggccttcgggttgtaaacctctttcaccagggacgaagctaacgtgacggtacctggagaagaagcaccggctaactacgtgccagcagccgcggtaatacgtagggtgcgagcgttg…	Bacteria;Actinobacteria;Micrococcales;Dermacoccaceae;Dermacoccus;	k__Bacteria;p__Actinobacteria;c__Actinobacteria;o__Actinomycetales;f__Dermacoccaceae;g__Dermacoccus;	Bacteria;Actinobacteria;Actinobacteria;Micrococcales;Dermacoccaceae;Dermacoccus;	Bacteria;"Actinobacteria";Actinobacteria;Actinobacteridae;Actinomycetales;Micrococcineae;Dermacoccaceae;Dermacoccus;	Bacteria;Actinobacteria;Actinobacteria;Micrococcales;Dermacoccaceae;Dermacoccus;
AF068_010	tataagactgggataacttcgggaaaccggagctaataccggataacatgttgaaccgcatggttcaacagtgaaagacggtcttgctgtcacttatagatggatccgcgccgcattagctagttggtaaggtaacggcttaccaaggcaacgatgcgtagccgacctgagagggtgatcggccacactggaactgagacacggtccagactcctacgggaggcagcagtagggaatcttccgcaatgggcgaaagcctgacggagcaacgccgcgtgagtgaagaaggtcttcggatcgtaaaactctgttattagggaagaacaaatgtgtaagtaactatgcacgtcttgacggtacctaatcagaaagccacggctaactacgtgccagcagccg…	Bacteria;	k__Bacteria;p__Firmicutes;c__Bacilli;o__Bacillales;f__Staphylococcaceae;g__Staphylococcus;	Unclassified;	Bacteria;Firmicutes;Bacilli;Bacillales;Staphylococcaceae;Staphylococcus;	Bacteria;Firmicutes;Bacilli;Bacillales;Staphylococcaceae;Staphylococcus;
AF068_011	ggtaagantgggataacttcgggaaaccggagctaataccggataatttctttcttcacatggagagaggttgaaagacggcttcggctgtcacttacagatgggcccgcggcgcattagctagttggtgaggtaacggctcaccaaggcgacgatgcgtagccgacctgagagggtgatcggccacactgggactgagacacggcccagactcctacgggaggcagcagtagggaatcttccgcaatggacgaaagtctgacggagcaacgccgcgtgagtgatgaaggtcttcggatcgtaaaactctgttatcagggaagaacaagtatcggagtaactgccggtaccttgacggtacctgaccagaaagccacggctaactacgtgccagcagcc…	Bacteria;	k__Bacteria;p__Firmicutes;c__Bacilli;o__Bacillales;f__Bacillaceae;g__Bacillus;	Unclassified;	Bacteria;Firmicutes;Bacilli;Bacillales;Bacillaceae 1;Bacillus;	Bacteria;Firmicutes;Bacilli;Bacillales;Bacillaceae;Bacillus;
AF068_012	cttaactctgggataagcctgggaaactgggtctaataccggataggagcgcctaccgcatggtgggtgttggaaagatttatcggttttggatggactcgcggcctatcagcttgttggtgaggtaatggctcaccaaggcgacgacgggtagccggcctgagagggtgaccggccacactgggactgagacacggcccagactcctacgggaggcagcagtggggaatattgcacaatgggcgcaagcctgatgcagcgacgccgcgtgagggatgacggccttcgggttgtaaacctctttcagtagggaagaagcgaaagtgacggtacctgcagaagaagcaccggctaactacgtgccagcagccgcggtaatacgtagggtgcgagcgttat…	Bacteria;Actinobacteria;Micrococcales;Micrococcaceae;Micrococcus;	k__Bacteria;p__Actinobacteria;c__Actinobacteria;o__Actinomycetales;f__Micrococcaceae;g__Micrococcus;s__luteus;	Unclassified;	Bacteria;"Actinobacteria";Actinobacteria;Actinobacteridae;Actinomycetales;Micrococcineae;Micrococcaceae;Micrococcus;	Bacteria;Actinobacteria;Actinobacteria;Micrococcales;Micrococcaceae;Micrococcus;
AF068_013	tataagactgggataacttcgggaaaccggagctaataccggataacatgttgaaccgcatggttcaacagtgaaagacggtcttgctgtcacttatagatggatccgcgccgcattagctagttggtaaggtaacggcttaccaaggcaacgatgcgtagccgacctgagagggtgatcggccacactggaactgagacacggtccagactcctacgggaggcagcagtagggaatcttccgcaatgggcgaaagcctgacggagcaacgccgcgtgagtgaagaaggtcttcggatcgtaaaactctgttattagggaagaacaaatgtgtaagtaactatgcacgtcttgacggtacctaatcagaaagccacggctaactacgtgccagcagccg…	Bacteria;	k__Bacteria;p__Firmicutes;c__Bacilli;o__Bacillales;f__Staphylococcaceae;g__Staphylococcus;	Unclassified;	Bacteria;Firmicutes;Bacilli;Bacillales;Staphylococcaceae;Staphylococcus;	Bacteria;Firmicutes;Bacilli;Bacillales;Staphylococcaceae;Staphylococcus;
AF068_016	cctcactctgggataagcctgggaaactgggtctaatactggatacgaccgatctccgcatggagtgttggtggaaagtttttgtggtgggggatggactcgcggcctatcagcttgttggtggggtaatggcctaccaaggcgacgacgggtagccggcctgagagggcgaccggccacactgggactgagacacggcccagactcctacgggaggcagcagtggggaatattgcacaatgggcgaaagcctgatgcagcgacgccgcgtgagggatgacggccttcgggttgtaaacctctttcaccagggacgaagctaacgtgacggtacctggagaagaagcaccggctaactacgtgccagcagccgcggtaatacgtagggtgcgagcgttg…	Bacteria;Actinobacteria;Micrococcales;Dermacoccaceae;Dermacoccus;	k__Bacteria;p__Actinobacteria;c__Actinobacteria;o__Actinomycetales;f__Dermacoccaceae;g__Dermacoccus;	Bacteria;Actinobacteria;Actinobacteria;Micrococcales;Dermacoccaceae;Dermacoccus;	Bacteria;"Actinobacteria";Actinobacteria;Actinobacteridae;Actinomycetales;Micrococcineae;Dermacoccaceae;Dermacoccus;	Bacteria;Actinobacteria;Actinobacteria;Micrococcales;Dermacoccaceae;Dermacoccus;
AF068_017	tataagactgggataacttcgggaaaccggagctaataccggataatatattgaaccgcatggttcaatagtgaaagacggttttgctgtcacttatagatggatccgcgccgcattagctagttggtaaggtaacggcttaccaaggcaacgatgcgtagccgacctgagagggtgatcggccacactggaactgagacacggtccagactcctacgggaggcagcagtagggaatcttccgcaatgggcgaaagcctgacggagcaacgccgcgtgagtgatgaaggtcttcggatcgtaaaactctgttattagggaagaacaaatgtgtaagtaactatgcacgtcttgacggtacctaatcagaaagccacggctaactacgtgccagcagccg…	Bacteria;	k__Bacteria;p__Firmicutes;c__Bacilli;o__Bacillales;f__Staphylococcaceae;g__Staphylococcus;s__epidermidis;	Unclassified;	Bacteria;Firmicutes;Bacilli;Bacillales;Staphylococcaceae;Staphylococcus;	Bacteria;Firmicutes;Bacilli;Bacillales;Staphylococcaceae;Staphylococcus;
AF068_018	tgtaagactgggataactccgggaaaccggagctaataccggatagttccttgaaccgcatggttcaaggatgaaagacggtttcggctgtcacttacagatggacccgcggcgcattagctagttggtggggtaatggctcaccaaggcgacgatgcgtagccgacctgagagggtgatcggccacactgggactgagacacggcccagactcctacgggaggcagcagtagggaatcttccgcaatggacgaaagtctgacggagcaacgccgcgtgagtgatgaaggttttcggatcgtaaagctctgttgttagggaagaacaagtgcgagagtaactgctcgcaccttgacggtacctaaccagaaagccacggctaactacgtgccagcagcc…	Bacteria;Firmicutes;Bacilli;Bacillales;Bacillaceae;Bacillus;	k__Bacteria;p__Firmicutes;c__Bacilli;o__Bacillales;f__Bacillaceae;g__Bacillus;	Unclassified;	Bacteria;Firmicutes;Bacilli;Bacillales;Bacillaceae 1;Bacillus;	Bacteria;Firmicutes;Bacilli;Bacillales;Bacillaceae;Bacillus;
AF068_019	cctgactctgggataagcgctggaaacggcgtctaatactggatacgagtagcgaccgcatggtcagttactggaaagaattttggttggggatgggctcgcggcctatcagcttgttggtgaggtaatggctcaccaaggcgtcgacgggtagccggcctgagagggtgaccggccacactgggactgagacacggcccagactcctacgggaggcagcagtggggaatattgcacaatgggcgcaagcctgatgcagcaacgccgcgtgagggatgacggccttcgggttgtaaacctcttttagcagggaagaagcgaaagtgacggtacctgcagaaaaagcgccggctaactacgtgccagcagccgcggtaatacgtagggcgcaagcgttat…	Bacteria;Actinobacteria;Micrococcales;Microbacteriaceae;Microbacterium;	k__Bacteria;p__Actinobacteria;c__Actinobacteria;o__Actinomycetales;f__Microbacteriaceae;g__Microbacterium;s__maritypicum;	Bacteria;Actinobacteria;Actinobacteria;Micrococcales;Microbacteriaceae;Microbacterium;	Bacteria;"Actinobacteria";Actinobacteria;Actinobacteridae;Actinomycetales;Micrococcineae;Microbacteriaceae;Microbacterium;	Bacteria;Actinobacteria;Actinobacteria;Micrococcales;Microbacteriaceae;Microbacterium;
AF068_020	cttaactctgggataagcctgggaaactgggtctaataccggataggagcgcctaccgcatggtgggtgttggaaagatttatcggttttggatggactcgcggcctatcagcttgttggtgaggtaatggctcaccaaggcgacgacgggtagccggcctgagagggtgaccggccacactgggactgagacacggcccagactcctacgggaggcagcagtggggaatattgcacaatgggcgcaagcctgatgcagcgacgccgcgtgagggatgacggccttcgggttgtaaacctctttcagtagggaagaagcgaaagtgacggtacctgcagaagaagcaccggctaactacgtgccagcagccgcggtaatacgtagggtgcgagcgttat…	Bacteria;Actinobacteria;Micrococcales;Micrococcaceae;Micrococcus;	k__Bacteria;p__Actinobacteria;c__Actinobacteria;o__Actinomycetales;f__Micrococcaceae;g__Micrococcus;s__luteus;	Unclassified;	Bacteria;"Actinobacteria";Actinobacteria;Actinobacteridae;Actinomycetales;Micrococcineae;Micrococcaceae;Micrococcus;	Bacteria;Actinobacteria;Actinobacteria;Micrococcales;Micrococcaceae;Micrococcus;
AF068_023	cttaactctgggataagcctgggaaactgggtctaataccggataggagcgcctaccgcatggtgggtgttggaaagatttatcggttttggatggactcgcggcctatcagcttgttggtgaggtaatggctcaccaaggcgacgacgggtagccggcctgagagggtgaccggccacactgggactgagacacggcccagactcctacgggaggcagcagtggggaatattgcacaatgggcgcaagcctgatgcagcgacgccgcgtgagggatgacggccttcgggttgtaaacctctttcagtagggaagaagcgaaagtgacggtacctgcagaagaagcaccggctaactacgtgccagcagccgcggtaatacgtagggtgcgagcgttat…	Bacteria;Actinobacteria;Micrococcales;Micrococcaceae;Micrococcus;	k__Bacteria;p__Actinobacteria;c__Actinobacteria;o__Actinomycetales;f__Micrococcaceae;g__Micrococcus;s__luteus;	Unclassified;	Bacteria;"Actinobacteria";Actinobacteria;Actinobacteridae;Actinomycetales;Micrococcineae;Micrococcaceae;Micrococcus;	Bacteria;Actinobacteria;Actinobacteria;Micrococcales;Micrococcaceae;Micrococcus;
AF068_025	cgnggtagaggtaaatcttggggaaaccgaacctaataccggataggatcttctccttcatgggagatgattgaaagatggtttcggctatcacttacagatgggcccgcggtgcattagctagttggtgaggtaacggctcaccaaggcaacgatgcatagccgacctgagagggtgatcggccacactgggactgagacacggcccagactcctacgggaggcagcagtagggaatcttccgcaatggacgaaagtctgacggagcaacgccgcgtgagtgatgaaggctttcgggtcgtaaaactctgttgttagggaagaacaagtacaagagtaactgcttgtaccttgacggtacctaaccagaaagccacggctaactacgtgccagcagcc…	Bacteria;Firmicutes;Bacilli;Bacillales;Bacillaceae;Bacillus;	k__Bacteria;p__Firmicutes;c__Bacilli;o__Bacillales;f__Bacillaceae;g__Bacillus;s__flexus;	Unclassified;	Bacteria;Firmicutes;Bacilli;Bacillales;Bacillaceae 1;Bacillus;	Bacteria;Firmicutes;Bacilli;Bacillales;Bacillaceae;Bacillus;
AF068_027	cctcactctgggataagcctgggaaactgggtctaatactggatacgaccgatctccgcatggagtgttggtggaaagtttttgtggtgggggatggactcgcggcctatcagcttgttggtggggtaatggcctaccaaggcgacgacgggtagccggcctgagagggcgaccggccacactgggactgagacacggcccagactcctacgggaggcagcagtggggaatattgcacaatgggcgaaagcctgatgcagcgacgccgcgtgagggatgacggccttcgggttgtaaacctctttcaccagggacgaagctaacgtgacggtacctggagaagaagcaccggctaactacgtgccagcagccgcggtaatacgtagggtgcgagcgttg…	Bacteria;Actinobacteria;Micrococcales;Dermacoccaceae;Dermacoccus;	k__Bacteria;p__Actinobacteria;c__Actinobacteria;o__Actinomycetales;f__Dermacoccaceae;g__Dermacoccus;	Bacteria;Actinobacteria;Actinobacteria;Micrococcales;Dermacoccaceae;Dermacoccus;	Bacteria;"Actinobacteria";Actinobacteria;Actinobacteridae;Actinomycetales;Micrococcineae;Dermacoccaceae;Dermacoccus;	Bacteria;Actinobacteria;Actinobacteria;Micrococcales;Dermacoccaceae;Dermacoccus;
AF068_028	cctcactctgggataagcctgggaaactgggtctaatactggatacgaccgatctccgcatggagtgttggtggaaagtttttgtggtgggggatggactcgcggcctatcagcttgttggtggggtaatggcctaccaaggcgacgacgggtagccggcctgagagggcgaccggccacactgggactgagacacggcccagactcctacgggaggcagcagtggggaatattgcacaatgggcgaaagcctgatgcagcgacgccgcgtgagggatgacggccttcgggttgtaaacctctttcaccagggacgaagctaacgtgacggtacctggagaagaagcaccggctaactacgtgccagcagccgcggtaatacgtagggtgcgagcgttg…	Bacteria;Actinobacteria;Micrococcales;Dermacoccaceae;Dermacoccus;	k__Bacteria;p__Actinobacteria;c__Actinobacteria;o__Actinomycetales;f__Dermacoccaceae;g__Dermacoccus;	Bacteria;Actinobacteria;Actinobacteria;Micrococcales;Dermacoccaceae;Dermacoccus;	Bacteria;"Actinobacteria";Actinobacteria;Actinobacteridae;Actinomycetales;Micrococcineae;Dermacoccaceae;Dermacoccus;	Bacteria;Actinobacteria;Actinobacteria;Micrococcales;Dermacoccaceae;Dermacoccus;
AF069_001	cttaactctgggataagcctgggaaactgggtctaataccggataggagcgcctaccgcatggtgggtgttggaaagatttatcggttttggatggactcgcggcctatcagcttgttggtgaggtnatggctcaccaaggcgacgacgggtagccggcctgagagggtgaccggccacactgggactgagacacggcccagactcctacgggaggcagcagtggggaatattgcacaatgggcgcaagcctgatgcagcgacgccgcgtgagggatgacggccttcgggttgtaaacctctttcagtagggaagaagcgaaagtgacggtacctgcagaagaagcaccggctaactacgtgccagcagccgcggtaatacgtagggtgcgagcgttat…	Bacteria;Actinobacteria;Micrococcales;Micrococcaceae;Micrococcus;	k__Bacteria;p__Actinobacteria;c__Actinobacteria;o__Actinomycetales;f__Micrococcaceae;g__Micrococcus;s__luteus;	Unclassified;	Bacteria;"Actinobacteria";Actinobacteria;Actinobacteridae;Actinomycetales;Micrococcineae;Micrococcaceae;Micrococcus;	Bacteria;Actinobacteria;Actinobacteria;Micrococcales;Micrococcaceae;Micrococcus;
AF069_004	catggtactggtaaatcttggggaagccggacctaataccggataatatttcgaaccgcatggttcgatagtgaaagatggctctgctatcacttatagatggacctgcgccgtattagctagttggtaaggtaacggcttaccaaggcaacgatacgtagccgacctgagagggtgatcggccacactggaactgagacacggtccagactcctacgggaggcagcagtagggaatcttccgcaatgggcgaaagcctgacggagcaacgccgcgtgagtgatgaaggtcttcggatcgtaaaactctgttattagggaagaacaaacgtgtaagtaactgtgcacgtcttgacggtacctaatcagaaagccacggctaactacgtgccagcagccg…	Bacteria;	k__Bacteria;p__Firmicutes;c__Bacilli;o__Bacillales;f__Staphylococcaceae;g__Staphylococcus;	Unclassified;	Bacteria;Firmicutes;Bacilli;Bacillales;Staphylococcaceae;Staphylococcus;	Bacteria;Firmicutes;Bacilli;Bacillales;Staphylococcaceae;Staphylococcus;
AF069_005	tatggtactgggataacttcgggaaaccggagctaataccggataatatttcgaaccgcatggttcgatagtgaaagatggctttgctatcacttatagatggacctgcgccgtattagctagttggtaaggtaacggcttaccaaggcaacgatacgtagccgacctgagagggtgatcggccacactggaactgagacacggtccagactcctacgggaggcagcagtagggaatcttccgcaatgggcgaaagcctgacggagcaacgccgcgtgagtgatgaaggtcttcggatcgtaaaactctgttattagggaagaacaaacgtgtaagtaactgtgcacgtcttgacggtacctaatcagaaagccacggctaactacgtgccagcagccg…	Bacteria;	k__Bacteria;p__Firmicutes;c__Bacilli;o__Bacillales;f__Staphylococcaceae;g__Staphylococcus;	Unclassified;	Bacteria;Firmicutes;Bacilli;Bacillales;Staphylococcaceae;Staphylococcus;	Bacteria;Firmicutes;Bacilli;Bacillales;Staphylococcaceae;Staphylococcus;
AF069_008	tataagactgggataacttcgggaaaccggagctaataccggataatatttcgaaccgcatggttcgatagtgaaagatggctctgctatcacttatagatggacctgcgccgtattagctagttggtaaggtaacggcttaccaaggcaacgatacgtagccgacctgagagggtgatcggccacactggaactgagacacggtccagactcctacgggaggcagcagtagggaatcttccgcaatgggcgaaagcctgacggagcaacgccgcgtgagtgatgaaggtcttcggatcgtaaaactctgttattagggaagaacaaacgtgtaagtaactgtgcacgtcttgacggtacctaatcagaaagccacggctaactacgtgccagcagccg…	Bacteria;Firmicutes;Bacilli;Bacillales;Staphylococcaceae;Staphylococcus;	k__Bacteria;p__Firmicutes;c__Bacilli;o__Bacillales;f__Staphylococcaceae;g__Staphylococcus;	Unclassified;	Bacteria;Firmicutes;Bacilli;Bacillales;Staphylococcaceae;Staphylococcus;	Bacteria;Firmicutes;Bacilli;Bacillales;Staphylococcaceae;Staphylococcus;
AF069_009	tataanactgggataacttcgggaaaccggagctaataccggataatatattgaaccgcatggttcaatagtgaaagacggttttgctgtcacttatagatggatccgcgccgcattagctagttggtaaggtaacggcttaccaaggcaacgatgcgtagccgacctgagagggtgatcggccacactggaactgagacacggtccagactcctacgggaggcagcagtagggaatcttccgcaatgggcgaaagcctgacggagcaacgccgcgtgagtgatgaaggtcttcggatcgtaaaactctgttattagggaagaacaaatgtgtaagtaactatgcacgtcttgacggtacctaatcagaaagccacggctaactacgtgccagcagccg…	Bacteria;	k__Bacteria;p__Firmicutes;c__Bacilli;o__Bacillales;f__Staphylococcaceae;g__Staphylococcus;s__epidermidis;	Unclassified;	Bacteria;Firmicutes;Bacilli;Bacillales;Staphylococcaceae;Staphylococcus;	Bacteria;Firmicutes;Bacilli;Bacillales;Staphylococcaceae;Staphylococcus;
AF069_010	tatggtactgggataacttcgggaaaccggagctaataccggataatatttcgaaccgcatggttcgatagtgaaagatggctttgctatcacttatagatggacctgcgccgtattagctagttggtaaggtaacggcttaccaaggcaacgatacgtagccgacctgagagggtgatcggccacactggaactgagacacggtccagactcctacgggaggcagcagtagggaatcttccgcaatgggcgaaagcctgacggagcaacgccgcgtgagtgatgaaggtcttcggatcgtaaaactctgttattagggaagaacaaacgtgtaagtaactgtgcacgtcttgacggtacctaatcagaaagccacggctaactacgtgccagcagccg…	Bacteria;	k__Bacteria;p__Firmicutes;c__Bacilli;o__Bacillales;f__Staphylococcaceae;g__Staphylococcus;	Unclassified;	Bacteria;Firmicutes;Bacilli;Bacillales;Staphylococcaceae;Staphylococcus;	Bacteria;Firmicutes;Bacilli;Bacillales;Staphylococcaceae;Staphylococcus;
AF070_001	tgtaagactgggataactccgggaaaccggggctaataccggatggttgtttgaaccgcatggttcagacataaaaggtggcttcggctaccacttacagatggacccgcggcgcattagctagttggtgaggtaacggctcaccaaggcnacgatgcgtagccgacctgagagggtgatcggccacactgggactgagacacggcccagactcctacgggaggcagcagtagggaatcttccgcaatggacgaaagtctgacggagcaacgccgcgtgagtgatgaaggttttcggatcgtaaagctctgttgttagggaagaacaagtgccgttcaaatagggcggcaccttgacggtacctaaccagaaagccacggctaactacgtgccagcagc…	Bacteria;Firmicutes;Bacilli;Bacillales;Bacillaceae;Bacillus;	k__Bacteria;p__Firmicutes;c__Bacilli;o__Bacillales;f__Bacillaceae;g__Bacillus;	Unclassified;	Bacteria;Firmicutes;Bacilli;Bacillales;Bacillaceae 1;Bacillus;	Bacteria;Firmicutes;Bacilli;Bacillales;Bacillaceae;Bacillus;
AF070_004	tgtaagactgggataactccgggaaaccggggctaataccggatggttgtttgaaccgcatggttcagacataaaaggtggcttcggctaccacttacagatggacccgcggcgcattagctagttggtgaggtaacggctcaccaaggcgacgatgcgtagccgacctgagagggtgatcggccacactgggactgagacacggcccagactcctacgggaggcagcagtagggaatcttccgcaatggacgaaagtctgacggagcaacgccgcgtgagtgatgaaggttttcggatcgtaaagctctgttgttagggaagaacaagtgccgttcaaatagggcggcaccttgacggtacctaaccagaaagccacggctaactacgtgccagcagc…	Bacteria;Firmicutes;Bacilli;Bacillales;Bacillaceae;Bacillus;	k__Bacteria;p__Firmicutes;c__Bacilli;o__Bacillales;f__Bacillaceae;g__Bacillus;	Unclassified;	Bacteria;Firmicutes;Bacilli;Bacillales;Bacillaceae 1;Bacillus;	Bacteria;Firmicutes;Bacilli;Bacillales;Bacillaceae;Bacillus;
AF070_005	tataagactgggataacttcgggaaaccggagctaataccggataatatttcgaaccgcatggttcgatagtgaaagatggctttgctatcacttatagatggacctgcgccgtattagctagttggtaaggtaacggcttaccaaggcaacgatacgtagccgacctgagagggtgatcggccacactggaactgagacacggtccagactcctacgggaggcagcagtagggaatcttccgcaatgggcgaaagcctgacggagcaacgccgcgtgagtgatgaaggtcttcggatcgtaaaactctgttattagggaagaacaaacgtgtaagtaactgtgcacgtcttgacggtacctaatcagaaagccacggctaactacgtgccagcagccg…	Bacteria;	k__Bacteria;p__Firmicutes;c__Bacilli;o__Bacillales;f__Staphylococcaceae;g__Staphylococcus;	Unclassified;	Bacteria;Firmicutes;Bacilli;Bacillales;Staphylococcaceae;Staphylococcus;	Bacteria;Firmicutes;Bacilli;Bacillales;Staphylococcaceae;Staphylococcus;
AF070_006	tttgactctgggataagcctgggaaactgggtctaataccggatgcgactactgcccgcatgggctggtggtggaaagggttatgtactggtcttagatgggctcacggcctatcagctggttggtggggtaatggcctaccaaggcgacgacgggtagccggcctgagagggtgaccggccacactgggactgagacacggcccagactcctacgggaggcagcagtggggaatattgcacaatgggcgcaagcctgatgcagcgacgccgcgtgagggatgacggccttcgggttgtaaacctctttcagcagggaagaagcggaagtgacggtacctgcagaagaagcgccggctaactacgtgccagcagccgcggtaatacgtagggcgcaagc…	Bacteria;	k__Bacteria;p__Actinobacteria;c__Actinobacteria;o__Actinomycetales;f__Micrococcaceae;	Bacteria;Actinobacteria;Actinobacteria;Micrococcales;Micrococcaceae;Kocuria;	Bacteria;"Actinobacteria";Actinobacteria;Actinobacteridae;Actinomycetales;Micrococcineae;Micrococcaceae;Kocuria;	Bacteria;Actinobacteria;Actinobacteria;Micrococcales;Micrococcaceae;Kocuria;
AF070_007	tataagactgggataacttcgggaaaccggagctaataccggataatatattgaaccgcatggttcaatagtgaaagacggttttgctgtcacttatagatggatccgcgccgcattagctagttggtaaggtaacggcttaccaaggcaacgatgcgtagccgacctgagagggtgatcggccacactggaactgagacacggtccagactcctacgggaggcagcagtagggaatcttccgcaatgggcgaaagcctgacggagcaacgccgcgtgagtgatgaaggtcttcggatcgtaaaactctgttattagggaagaacaaatgtgtaagtaactatgcacgtcttgacggtacctaatcagaaagccacggctaactacgtgccagcagccg…	Bacteria;Firmicutes;Bacilli;Bacillales;Staphylococcaceae;Staphylococcus;	k__Bacteria;p__Firmicutes;c__Bacilli;o__Bacillales;f__Staphylococcaceae;g__Staphylococcus;s__epidermidis;	Unclassified;	Bacteria;Firmicutes;Bacilli;Bacillales;Staphylococcaceae;Staphylococcus;	Bacteria;Firmicutes;Bacilli;Bacillales;Staphylococcaceae;Staphylococcus;
AF070_008	tataagactgggataacttcgggaaaccggagctaataccggataatatattgaaccgcatggttcaatagtgaaagacggttttgctgtcacttatagatggatccgcgccgcattagctagttggtaaggtaacggcttaccaaggcaacgatgcgtagccgacctgagagggtgatcggccacactggaactgagacacggtccagactcctacgggaggcagcagtagggaatcttccgcaatgggcgaaagcctgacggagcaacgccgcgtgagtgatgaaggtcttcggatcgtaaaactctgttattagggaagaacaaatgtgtaagtaactatgcacgtcttgacggtacctaatcagaaagccacggctaactacgtgccagcagccg…	Bacteria;Firmicutes;Bacilli;Bacillales;Staphylococcaceae;Staphylococcus;	k__Bacteria;p__Firmicutes;c__Bacilli;o__Bacillales;f__Staphylococcaceae;g__Staphylococcus;s__epidermidis;	Unclassified;	Bacteria;Firmicutes;Bacilli;Bacillales;Staphylococcaceae;Staphylococcus;	Bacteria;Firmicutes;Bacilli;Bacillales;Staphylococcaceae;Staphylococcus;
AF070_009	tctcagactgggataacatagggaaacttatgctaataccggataggtttttggaccgcatggtccgaaaagaaaagatggcttcggctatcactgggagatgggcctgcggcgcattagctagttggtggggtaacggcctaccaaggcgacgatgcgtagccgacctgagagggtgaccggccacactgggactgagacacggcccagactcctacgggaggcagcagtagggaattttccacaatggacgaaagtctgatggagcaacgccgcgtgaacgatgaaggtcttcggattgtaaagttctgttgttagggacgaataagtaccgttcgaatagggcggtaccttgacggtacctgacgagaaagccacggctaactacgtgccagcagc…	Bacteria;	k__Bacteria;p__Firmicutes;c__Bacilli;o__Bacillales;f__Paenibacillaceae;g__Brevibacillus;	Bacteria;Firmicutes;Bacilli;Bacillales;Paenibacillaceae;Brevibacillus;	Bacteria;Firmicutes;Bacilli;Bacillales;Paenibacillaceae 1;Brevibacillus;	Bacteria;Firmicutes;Bacilli;Bacillales;Paenibacillaceae;Brevibacillus;
AF070_010	tttgactctgggataagcctgggaaactgggtctaataccggatgcgactactgcccgcatgggctggtggtggaaagggttatgtactggtcttagatgggctcacggcctatcagctggttggtggggtaatggcctaccaaggcgacgacgggtagccggcctgagagggtgaccggccacactgggactgagacacggcccagactcctacgggaggcagcagtggggaatattgcacaatgggcgcaagcctgatgcagcgacgccgcgtgagggatgacggccttcgggttgtaaacctctttcagcagggaagaagcggaagtgacggtacctgcagaagaagcgccggctaactacgtgccagcagccgcggtaatacgtagggcgcaagc…	Bacteria;	k__Bacteria;p__Actinobacteria;c__Actinobacteria;o__Actinomycetales;f__Micrococcaceae;	Bacteria;Actinobacteria;Actinobacteria;Micrococcales;Micrococcaceae;Kocuria;	Bacteria;"Actinobacteria";Actinobacteria;Actinobacteridae;Actinomycetales;Micrococcineae;Micrococcaceae;Kocuria;	Bacteria;Actinobacteria;Actinobacteria;Micrococcales;Micrococcaceae;Kocuria;
AF070_011	tataagactgggataacttcgggaaaccggagctaataccggataatatattgaaccgcatggttcaatagtgaaagacggttttgctgtcacttatagatggatccgcgccgcattagctagttggtaaggtaacggcttaccaaggcaacgatgcgtagccgacctgagagggtgatcggccacactggaactgagacacggtccagactcctacgggaggcagcagtagggaatcttccgcaatgggcgaaagcctgacggagcaacgccgcgtgagtgatgaaggtcttcggatcgtaaaactctgttattagggaagaacaaatgtgtaagtaactatgcacgtcttgacggtacctaatcagaaagccacggctaactacgtgccagcagccg…	Bacteria;Firmicutes;Bacilli;Bacillales;Staphylococcaceae;Staphylococcus;	k__Bacteria;p__Firmicutes;c__Bacilli;o__Bacillales;f__Staphylococcaceae;g__Staphylococcus;s__epidermidis;	Unclassified;	Bacteria;Firmicutes;Bacilli;Bacillales;Staphylococcaceae;Staphylococcus;	Bacteria;Firmicutes;Bacilli;Bacillales;Staphylococcaceae;Staphylococcus;
AF070_012	tataagactgggataacttcgggaaaccggagctaataccggataatatattgaaccgcatggttcaatagtgaaagacggttttgctgtcacttatagatggatccgcgccgcattagctagttggtaaggtaacggcttaccaaggcaacgatgcgtagccgacctgagagggtgatcggccacactggaactgagacacggtccagactcctacgggaggcagcagtagggaatcttccgcaatgggcgaaagcctgacggagcaacgccgcgtgagtgatgaaggtcttcggatcgtaaaactctgttattagggaagaacaaatgtgtaagtaactatgcacgtcttgacggtacctaatcagaaagccacggctaactacgtgccagcagccg…	Bacteria;Firmicutes;Bacilli;Bacillales;Staphylococcaceae;Staphylococcus;	k__Bacteria;p__Firmicutes;c__Bacilli;o__Bacillales;f__Staphylococcaceae;g__Staphylococcus;s__epidermidis;	Unclassified;	Bacteria;Firmicutes;Bacilli;Bacillales;Staphylococcaceae;Staphylococcus;	Bacteria;Firmicutes;Bacilli;Bacillales;Staphylococcaceae;Staphylococcus;
AF070_013	tataagactgggataacttcgggaaaccggagctaataccggataatatattgaaccgcatggttcaatagtgaaagacggttttgctgtcacttatagatggatccgcgccgcattagctagttggtaaggtaacggcttaccaaggcaacgatgcgtagccgacctgagagggtgatcggccacactggaactgagacacggtccagactcctacgggaggcagcagtagggaatcttccgcaatgggcgaaagcctgacggagcaacgccgcgtgagtgatgaaggtcttcggatcgtaaaactctgttattagggaagaacaaatgtgtaagtaactatgcacgtcttgacggtacctaatcagaaagccacggctaactacgtgccagcagccg…	Bacteria;Firmicutes;Bacilli;Bacillales;Staphylococcaceae;Staphylococcus;	k__Bacteria;p__Firmicutes;c__Bacilli;o__Bacillales;f__Staphylococcaceae;g__Staphylococcus;s__epidermidis;	Unclassified;	Bacteria;Firmicutes;Bacilli;Bacillales;Staphylococcaceae;Staphylococcus;	Bacteria;Firmicutes;Bacilli;Bacillales;Staphylococcaceae;Staphylococcus;
AF070_102	tataagactgggataacttcgggaaaccggagctaataccggataatatttcgaaccgcatggttcgatagtgaaagatggctttgctatcacttatagatggacctgcgccgtattagctagttggtaaggtaacggcttaccaaggcaacgatacgtagccgacctgagagggtgatcggccacactggaactgagacacggtccagactcctacgggaggcagcagtagggaatcttccgcaatgggcgaaagcctgacggagcaacgccgcgtgagtgatgaaggtcttcggatcgtaaaactctgttattagggaagaacaaacgtgtaagtaactgtgcacgtcttgacggtacctaatcagaaagccacggctaactacgtgccagcagccg…	Bacteria;	k__Bacteria;p__Firmicutes;c__Bacilli;o__Bacillales;f__Staphylococcaceae;g__Staphylococcus;	Unclassified;	Bacteria;Firmicutes;Bacilli;Bacillales;Staphylococcaceae;Staphylococcus;	Bacteria;Firmicutes;Bacilli;Bacillales;Staphylococcaceae;Staphylococcus;
AF070_103	tatggtactggtataacttcnggaaaccggagctaataccggataatatattgaaccgcatggttcaatagtgaaagacggttttgctgtcacttatagatggatccgcgccgcattagctagttggtaaggtaacggcttaccaaggcaacgatgcgtagccgacctgagagggtgatcggccacactggaactgagacacggtccagactcctacgggaggcagcagtagggaatcttccgcaatgggcgaaagcctgacggagcaacgccgcgtgagtgatgaaggtcttcggatcgtaaaactctgttattagggaagaacaaatgtgtaagtaactatgcacgtcttgacggtacctaatcagaaagccacggctaactacgtgccagcagccg…	Bacteria;	k__Bacteria;p__Firmicutes;c__Bacilli;o__Bacillales;f__Staphylococcaceae;g__Staphylococcus;s__epidermidis;	Unclassified;	Bacteria;Firmicutes;Bacilli;Bacillales;Staphylococcaceae;Staphylococcus;	Bacteria;Firmicutes;Bacilli;Bacillales;Staphylococcaceae;Staphylococcus;
AF070_104	tatggtactggtaaatcttggggaagccggacctaataccggataatatttcgaaccgcatggttcgatagtgaaagatggctctgctatcacttatagatggacctgcgccgtattagctagttggtaaggtaacggcttaccaaggcaacgatacgtagccgacctgagagggtgatcggccacactggaactgagacacggtccagactcctacgggaggcagcagtagggaatcttccgcaatgggcgaaagcctgacggagcaacgccgcgtgagtgatgaaggtcttcggatcgtaaaactctgttattagggaagaacaaacgtgtaagtaactgtgcacgtcttgacggtacctaatcagaaagccacggctaactacgtgccagcagccg…	Bacteria;Firmicutes;Bacilli;Bacillales;Staphylococcaceae;Staphylococcus;	k__Bacteria;p__Firmicutes;c__Bacilli;o__Bacillales;f__Staphylococcaceae;g__Staphylococcus;	Unclassified;	Bacteria;Firmicutes;Bacilli;Bacillales;Staphylococcaceae;Staphylococcus;	Bacteria;Firmicutes;Bacilli;Bacillales;Staphylococcaceae;Staphylococcus;
AF070_106	tataagactgggataacttcgggaaaccggagctaataccggataatatattgaaccgcatggttcaatagtgaaagacggttttgctgtcacttatagatggatccgcgccgcattagctagttggtaaggtaacggcttaccaaggcaacgatgcgtagccgacctgagagggtgatcggccacactggaactgagacacggtccagactcctacgggaggcagcagtagggaatcttccgcaatgggcgaaagcctgacggagcaacgccgcgtgagtgatgaaggtcttcggatcgtaaaactctgttattagggaagaacaaatgtgtaagtaactatgcacgtcttgacggtacctaatcagaaagccacggctaactacgtgccagcagccg…	Bacteria;	k__Bacteria;p__Firmicutes;c__Bacilli;o__Bacillales;f__Staphylococcaceae;g__Staphylococcus;s__epidermidis;	Unclassified;	Bacteria;Firmicutes;Bacilli;Bacillales;Staphylococcaceae;Staphylococcus;	Bacteria;Firmicutes;Bacilli;Bacillales;Staphylococcaceae;Staphylococcus;
AF070_201	cttgactttgggataacttcaggaaactggggctaataccggataggagctcctgctgcatggtgggggttggaaagtttcggcggttggggatggactcgcggcttatcagcttgttggtggggtagtggcttaccaaggctttgacgggtagccggcctgagagggtgaccggccacattgggactgagatacggcccagactcctacgggaggcagcagtggggaatattgcacaatgggcggaagcctgatgcagcaacgccgcgtgcgggatgacggccttcgggttgtaaaccgctttcgcctgtgacgaagcgtgagtgacggtaatgggtaaagaagcaccggctaactacgtgccagcagccgcggtgatacgtagggtgcgagcgttgt…	Unclassified;	k__Bacteria;p__Actinobacteria;c__Actinobacteria;o__Actinomycetales;f__Propionibacteriaceae;g__Propionibacterium;s__acnes;	Unclassified;	Bacteria;"Actinobacteria";Actinobacteria;Actinobacteridae;Actinomycetales;Propionibacterineae;Propionibacteriaceae;Propionibacterium;	Bacteria;Actinobacteria;Actinobacteria;Propionibacteriales;Propionibacteriaceae;Cutibacterium;
AF070_204	tataagactgggataacttcgggaaaccggagctaataccagataacatgttgaaccgcatggttcaacagtgaaagacggtcttgctgtcacttatagatggatccgcgccgcattagctagttggtaaggtaacggcttaccaaggcaacgatgcgtagccgacctgagagggtgatcggccacactggaactgagacacggtccagactcctacgggaggcagcagtagggaatcttccgcaatgggcgaaagcctgacggagcaacgccgcgtgagtgatgaaggtcttcggatcgtaaaactctgttattagggaagaacaaatgtgtaagtaactatgcacgtcttgacggcacctaatcagaaagccacggctaactacgtgccagcagccg…	Unclassified;	k__Bacteria;p__Firmicutes;c__Bacilli;o__Bacillales;f__Staphylococcaceae;g__Staphylococcus;s__epidermidis;	Bacteria;Firmicutes;Bacilli;Bacillales;Staphylococcaceae;Staphylococcus;	Bacteria;Firmicutes;Bacilli;Bacillales;Staphylococcaceae;Staphylococcus;	Bacteria;Firmicutes;Bacilli;Bacillales;Staphylococcaceae;Staphylococcus;
AF070_205	tataagactgggataacttcgggaaaccggagctaataccggataatatattgaaccgcatggttcaatagtgaaagacggttttgctgtcacttatagatggatccgcgccgcattagctagttggtaaggtaacggcttaccaaggcaacgatgcgtagccgacctgagagggtgatcggccacactggaactgagacacggtccagactcctacgggaggcagcagtagggaatcttccgcaatgggcgaaagcctgacggagcaacgccgcgtgagtgatgaaggtcttcggatcgtaaaactctgttattagggaagaacaaatgtgtaagtaactatgcacgtcttgacggtacctaatcagaaagccacggctaactacgtgccagcagccg…	Bacteria;	k__Bacteria;p__Firmicutes;c__Bacilli;o__Bacillales;f__Staphylococcaceae;g__Staphylococcus;s__epidermidis;	Unclassified;	Bacteria;Firmicutes;Bacilli;Bacillales;Staphylococcaceae;Staphylococcus;	Bacteria;Firmicutes;Bacilli;Bacillales;Staphylococcaceae;Staphylococcus;
AF070_301	tgtaagactgggataactccgggaaaccggggctaataccggatggttgtttgaaccgcatggttcagacataaaaggtggcttcggctaccacttacagatggacccgcggcgcattagctagttggtgaggtaacggctcaccaaggcgacgatgcgtagccgacctgagagggtgatcggccacactgggactgagacacggcccagactcctacgggaggcagcagtagggaatcttccgcaatggacgaaagtctgacggagcaacgccgcgtgagtgatgaaggttttcggatcgtaaagctctgttgttagggaagaacaagtgccgttcaaatagggcggcaccttgacggtacctaaccagaaagccacggctaactacgtgccagcagc…	Bacteria;Firmicutes;Bacilli;Bacillales;Bacillaceae;Bacillus;	k__Bacteria;p__Firmicutes;c__Bacilli;o__Bacillales;f__Bacillaceae;g__Bacillus;	Unclassified;	Bacteria;Firmicutes;Bacilli;Bacillales;Bacillaceae 1;Bacillus;	Bacteria;Firmicutes;Bacilli;Bacillales;Bacillaceae;Bacillus;
AF070_302	tgtaagactgggataactccgggaaaccggggctaataccggatggttgtttgaaccgcatggttcagacataaaaggtggcttcggctaccacttacagatggacccgcggcgcattagctagttggtgaggtaacggctcaccaaggcgacgatgcgtagccgacctgagagggtgatcggccacactgggactgagacacggcccagactcctacgggaggcagcagtagggaatcttccgcaatggacgaaagtctgacggagcaacgccgcgtgagtgatgaaggttttcggatcgtaaagctctgttgttagggaagaacaagtgccgttcaaatagggcggcaccttgacggtacctaaccagaaagccacggctaactacgtgccagcagc…	Bacteria;Firmicutes;Bacilli;Bacillales;Bacillaceae;Bacillus;	k__Bacteria;p__Firmicutes;c__Bacilli;o__Bacillales;f__Bacillaceae;g__Bacillus;	Unclassified;	Bacteria;Firmicutes;Bacilli;Bacillales;Bacillaceae 1;Bacillus;	Bacteria;Firmicutes;Bacilli;Bacillales;Bacillaceae;Bacillus;
AF070_306	tataagactgggataacttcgggaaaccggagctaataccggataatatattgaaccgcatggttcaatagtgaaagacggttttgctgtcacttatagatggatccgcgccgcattagctagttggtaaggtaacggcttaccaaggcaacgatgcgtagccgacctgagagggtgatcggccacactggaactgagacacggtccagactcctacgggaggcagcagtagggaatcttccgcaatgggcgaaagcctgacggagcaacgccgcgtgagtgatgaaggtcttcggatcgtaaaactctgttattagggaagaacaaatgtgtaagtaactatgcacgtcttgacggtacctaatcagaaagccacggctaactacgtgccagcagccg…	Bacteria;	k__Bacteria;p__Firmicutes;c__Bacilli;o__Bacillales;f__Staphylococcaceae;g__Staphylococcus;s__epidermidis;	Unclassified;	Bacteria;Firmicutes;Bacilli;Bacillales;Staphylococcaceae;Staphylococcus;	Bacteria;Firmicutes;Bacilli;Bacillales;Staphylococcaceae;Staphylococcus;
AF070_307	tataagactgggataacttcgggaaaccggagctaataccggataatatattgaaccgcatggttcaatagtgaaagacggttttgctgtcacttatagatggatccgcgccgcattagctagttggtaaggtaacggcttaccaaggcaacgatgcgtagccgacctgagagggtgatcggccacactggaactgagacacggtccagactcctacgggaggcagcagtagggaatcttccgcaatgggcgaaagcctgacggagcaacgccgcgtgagtgatgaaggtcttcggatcgtaaaactctgttattagggaagaacaaatgtgtaagtaactatgcacgtcttgacggtacctaatcagaaagccacggctaactacgtgccagcagccg…	Bacteria;	k__Bacteria;p__Firmicutes;c__Bacilli;o__Bacillales;f__Staphylococcaceae;g__Staphylococcus;s__epidermidis;	Unclassified;	Bacteria;Firmicutes;Bacilli;Bacillales;Staphylococcaceae;Staphylococcus;	Bacteria;Firmicutes;Bacilli;Bacillales;Staphylococcaceae;Staphylococcus;
AF070_308	tataagactgggataacttcgggaaaccggagctaataccggataatatttcgaaccgcatggttcgatagtgaaagatggctttgctatcacttatagatggacctgcgccgtattagctagttggtaaggtaacggcttaccaaggcaacgatacgtagccgacctgagagggtgatcggccacactggaactgagacacggtccagactcctacgggaggcagcagtagggaatcttccgcaatgggcgaaagcctgacggagcaacgccgcgtgagtgatgaaggtcttcggatcgtaaaactctgttattagggaagaacaaacgtgtaagtaactgtgcacgtcttgacggtacctaatcagaaagccacggctaactacgtgccagcagccg…	Unclassified;	k__Bacteria;p__Firmicutes;c__Bacilli;o__Bacillales;f__Staphylococcaceae;g__Staphylococcus;	Unclassified;	Bacteria;Firmicutes;Bacilli;Bacillales;Staphylococcaceae;Staphylococcus;	Bacteria;Firmicutes;Bacilli;Bacillales;Staphylococcaceae;Staphylococcus;
AF070_403	tataagactgggataacttcgggaaaccggagctaataccggataatatttcgaaccgcatggttcgatagtgaaagatggctctgctatcacttatagatggacctgcgccgtattagctagttggtaaggtaacggcttaccaaggcaacgatacgtagccgacctgagagggtgatcggccacactggaactgagacacggtccagactcctacgggaggcagcagtagggaatcttccgcaatgggcgaaagcctgacggagcaacgccgcgtgagtgatgaaggtcttcggatcgtaaaactctgttattagggaagaacaaacgtgtaagtaactgtgcacgtcttgacggtacctaatcagaaagccacggctaactacgtgccagcagccg…	Bacteria;Firmicutes;Bacilli;Bacillales;Staphylococcaceae;Staphylococcus;	k__Bacteria;p__Firmicutes;c__Bacilli;o__Bacillales;f__Staphylococcaceae;g__Staphylococcus;	Unclassified;	Bacteria;Firmicutes;Bacilli;Bacillales;Staphylococcaceae;Staphylococcus;	Bacteria;Firmicutes;Bacilli;Bacillales;Staphylococcaceae;Staphylococcus;
AF070_404	tataagactgggataacttcgggaaaccggagctaataccggataatatttcgaaccgcatggttcgatagtgaaagatggctttgctatcacttatagatggacctgcgccgtattagctagttggtaaggtaacggcttaccaaggcaacgatacgtagccgacctgagagggtgatcggccacactggaactgagacacggtccagactcctacgggaggcagcagtagggaatcttccgcaatgggcgaaagcctgacggagcaacgccgcgtgagtgatgaaggtcttcggatcgtaaaactctgttattagggaagaacaaacgtgtaagtaactgtgcacgtcttgacggtacctaatcagaaagccacggctaactacgtgccagcagccg…	Bacteria;	k__Bacteria;p__Firmicutes;c__Bacilli;o__Bacillales;f__Staphylococcaceae;g__Staphylococcus;	Unclassified;	Bacteria;Firmicutes;Bacilli;Bacillales;Staphylococcaceae;Staphylococcus;	Bacteria;Firmicutes;Bacilli;Bacillales;Staphylococcaceae;Staphylococcus;
AF070_405	tataagactgggataacttcgggaaaccggagctaataccggataatatttcgaaccgcatggttcgatagtgaaagatggctttgctatcacttatagatggacctgcgccgtattagctagttggtaaggtaacggcttaccaaggcaacgatacgtagccgacctgagagggtgatcggccacactggaactgagacacggtccagactcctacgggaggcagcagtagggaatcttccgcaatgggcgaaagcctgacggagcaacgccgcgtgagtgatgaaggtcttcggatcgtaaaactctgttattagggaagaacaaacgtgtaagtaactgtgcacgtcttgacggtacctaatcagaaagccacggctaactacgtgccagcagccg…	Bacteria;	k__Bacteria;p__Firmicutes;c__Bacilli;o__Bacillales;f__Staphylococcaceae;g__Staphylococcus;	Unclassified;	Bacteria;Firmicutes;Bacilli;Bacillales;Staphylococcaceae;Staphylococcus;	Bacteria;Firmicutes;Bacilli;Bacillales;Staphylococcaceae;Staphylococcus;
AF070_406	tataagactgggataacttcgggaaaccggagctaataccggataatatttcgaaccgcatggttcgatagtgaaagatggctttgctatcacttatagatggacctgcgccgtattagctagttggtaaggtaacggcttaccaaggcaacgatacgtagccgacctgagagggtgatcggccacactggaactgagacacggtccagactcctacgggaggcagcagtagggaatcttccgcaatgggcgaaagcctgacggagcaacgccgcgtgagtgatgaaggtcttcggatcgtaaaactctgttattagggaagaacaaacgtgtaagtaactgtgcacgtcttgacggtacctaatcagaaagccacggctaactacgtgccagcagccg…	Bacteria;	k__Bacteria;p__Firmicutes;c__Bacilli;o__Bacillales;f__Staphylococcaceae;g__Staphylococcus;	Unclassified;	Bacteria;Firmicutes;Bacilli;Bacillales;Staphylococcaceae;Staphylococcus;	Bacteria;Firmicutes;Bacilli;Bacillales;Staphylococcaceae;Staphylococcus;
AF070_501	tgtaagactgggataactccgggaaaccggggctaataccggatggttgtttgaaccgcatggttcagacataaaaggtggcttcggctaccacttacagatggacccgcggcgcattagctagttggtgaggtaacggctcaccaaggcgacgatgcgtagccgacctgagagggtgatcggccacactgggactgagacacggcccagactcctacgggaggcagcagtagggaatcttccgcaatggacgaaagtctgacggagcaacgccgcgtgagtgatgaaggttttcggatcgtaaagctctgttgttagggaagaacaagtgccgttcaaatagggcggcaccttgacggtacctaaccagaaagccacggctaactacgtgccagcagc…	Bacteria;Firmicutes;Bacilli;Bacillales;Bacillaceae;Bacillus;	k__Bacteria;p__Firmicutes;c__Bacilli;o__Bacillales;f__Bacillaceae;g__Bacillus;	Unclassified;	Bacteria;Firmicutes;Bacilli;Bacillales;Bacillaceae 1;Bacillus;	Bacteria;Firmicutes;Bacilli;Bacillales;Bacillaceae;Bacillus;
AF070_502	ctgaggtgggggacaaccccgggaaactggggctaataccgcatatgggctgaggcccaaagccgagaggcgcctttggagcggcctgcgtccgattaggtagttggtggggtaaaggcctaccaagcctgcgatcggtagctggtctgagaggacgaccagccacactgggactgagacacggcccagactcctacgggaggcagcagtggggaatattggacaatgggcgaaagcctgatccagcaatgccgcgtgggtgaagaaggtcttcggatcgtaaagccctttcgacggggacgatgatgacggtacccgtagaagaagccccggctaacttcgtgccagcagccgcggtaatacgaagggggctagcgttgctcggaattactgggcgta…	Bacteria;Proteobacteria;Alphaproteobacteria;Rhodospirillales;Acetobacteraceae;Roseomonas;	k__Bacteria;p__Proteobacteria;c__Alphaproteobacteria;o__Rhodospirillales;f__Acetobacteraceae;g__Roseomonas;s__mucosa;	Bacteria;Proteobacteria;Alphaproteobacteria;Rhodospirillales;Acetobacteraceae;Roseomonas;	Bacteria;"Proteobacteria";Alphaproteobacteria;Rhodospirillales;Acetobacteraceae;Roseomonas;	Bacteria;Proteobacteria;Alphaproteobacteria;Acetobacterales;Acetobacteraceae;Roseomonas;
AF070_701	ggcanggnagggataactccgggaaaccggggctaataccggatggttgtttgaaccgcatggttcagacataaaaggtggcttcggctaccacttacagatggacccgcggcgcattagctagttggtgaggtaacggctcaccaaggcgacgatgcgtagccgacctgagagggtgatcggccacactgggactgagacacggcccagactcctacgggaggcagcagtagggaatcttccgcaatggacgaaagtctgacggagcaacgccgcgtgagtgatgaaggttttcggatcgtaaagctctgttgttagggaagaacaagtgccgttcaaatagggcggcaccttgacggtacctaaccagaaagccacggctaactacgtgccagcagc…	Bacteria;Firmicutes;Bacilli;Bacillales;Bacillaceae;Bacillus;Bacillus amyloliquefaciens group;	k__Bacteria;p__Firmicutes;c__Bacilli;o__Bacillales;f__Bacillaceae;g__Bacillus;	Unclassified;	Bacteria;Firmicutes;Bacilli;Bacillales;Bacillaceae 1;Bacillus;	Bacteria;Firmicutes;Bacilli;Bacillales;Bacillaceae;Bacillus;
AF070_801	cttgactttgggataacttcaggaaactggggctaataccggataggagctcctgctgcatggtgggggttggaaagtttcggcggttggggatggactcgcggcttatcagcttgttggtggggtagtggcttaccaaggctttgacgggtagccggcctgagagggtgaccggccacattgggactgagatacggcccagactcctacgggaggcagcagtggggaatattgcacaatgggcggaagcctgatgcagcaacgccgcgtgcgggatgacggccttcgggttgtaaaccgctttcgcctgtgacgaagcgtgagtgacggtaatgggtaaagaagcaccggctaactacgtgccagcagccgcggtgatacgtagggtgcgagcgttgt…	Bacteria;	k__Bacteria;p__Actinobacteria;c__Actinobacteria;o__Actinomycetales;f__Propionibacteriaceae;g__Propionibacterium;s__acnes;	Unclassified;	Bacteria;"Actinobacteria";Actinobacteria;Actinobacteridae;Actinomycetales;Propionibacterineae;Propionibacteriaceae;Propionibacterium;	Bacteria;Actinobacteria;Actinobacteria;Propionibacteriales;Propionibacteriaceae;Cutibacterium;
AM054_001	tgtaagactgggataacttcgggaaaccgaagctaataccggataggatcttctccttcatgggagatgattgaaagatggtttcggctatcacttacagatgggcccgcggtgcattagctagttggtgaggtaacggctcaccaaggcaacgatgcatagccgacctgagagggtgatcggccacactgggactgagacacggcccagactcctacgggaggcagcagtagggaatcttccgcaatggacgaaagtctgacggagcaacgccgcgtgagtgatgaaggctttcgggtcgtaaaactctgttgttagggaagaacaagtacaagagtaactgcttgtaccttgacggtacctaaccagaaagccacggctaactacgtgccagcagcc…	Bacteria;Firmicutes;Bacilli;Bacillales;Bacillaceae;Bacillus;	k__Bacteria;p__Firmicutes;c__Bacilli;o__Bacillales;f__Bacillaceae;g__Bacillus;s__flexus;	Unclassified;	Bacteria;Firmicutes;Bacilli;Bacillales;Bacillaceae 1;Bacillus;	Bacteria;Firmicutes;Bacilli;Bacillales;Bacillaceae;Bacillus;
AM054_003	cataagactgggataactccgggaaaccggggctaataccggataatattttgaactgcatggttcgaaattgaaaggcggcttcggctgtcacttatggatggacccgcgtcgcattagctagttggtgaggtaacggctcaccaaggcaacgatgcgtagccgacctgagagggtgatcggccacactgggactgagacacggcccagactcctacgggaggcagcagtagggaatcttccgcaatggacgaaagtctgacggagcaacgccgcgtgagtgatgaaggctttcgggtcgtaaaactctgttgttagggaagaacaagtgctagttgaataagctggcaccttgacggtacctaaccagaaagccacggctaactacgtgccagcagc…	Bacteria;Firmicutes;Bacilli;Bacillales;Bacillaceae;Bacillus;	k__Bacteria;p__Firmicutes;c__Bacilli;o__Bacillales;f__Bacillaceae;	Unclassified;	Bacteria;Firmicutes;Bacilli;Bacillales;Bacillaceae 1;Bacillus;	Bacteria;Firmicutes;Bacilli;Bacillales;Bacillaceae;Bacillus;
AM054_004	cttaactcggggataagcctgggaaactgggtctaataccggataggagcgtccaccgcatggtgggtgttggaaagatttatcggttttggatggactcgcggcctatcagcttgttggtgaggtaatggctcaccaaggcgacgacgggtagccggcctgagagggtgaccggccacactgggactgagacacggcccagactcctacgggaggcagcagtggggaatattgcacaatgggcgcaagcctgatgcagcgacgccgcgtgagggatgacggccttcgggttgtaaacctctttcagtagggaagaagcgaaagtgacggtacctgcagaagaagcaccggctaactacgtgccagcagccgcggtaatacgtagggtgcgagcgttat…	Bacteria;Actinobacteria;Micrococcales;Micrococcaceae;Micrococcus;	k__Bacteria;p__Actinobacteria;c__Actinobacteria;o__Actinomycetales;f__Micrococcaceae;g__Micrococcus;s__luteus;	Unclassified;	Bacteria;"Actinobacteria";Actinobacteria;Actinobacteridae;Actinomycetales;Micrococcineae;Micrococcaceae;Micrococcus;	Bacteria;Actinobacteria;Actinobacteria;Micrococcales;Micrococcaceae;Micrococcus;
AM054_005	cttaactccgggataagcctgggaaactgggtctaataccggataggagcgcctaccgcatggtgggtgttggaaagatttatcggttttggatggactcgcggcctatcagcttgttggtgaggtaatggctcaccaaggcgacgacgggtagccggcctgagagggtgaccggccacactgggactgagacacggcccagactcctacgggaggcagcagtggggaatattgcacaatgggcgaaagcctgatgcagcgacgccgcgtgagggatgacggccttcgggttgtaaacctctttcagtagggaagaagcgaaagtgacggtacctgcagaagaagcaccggctaactacgtgccagcagccgcggtaatacgtagggtgcgagcgttat…	Bacteria;	k__Bacteria;p__Actinobacteria;c__Actinobacteria;o__Actinomycetales;f__Micrococcaceae;g__Micrococcus;s__luteus;	Unclassified;	Bacteria;"Actinobacteria";Actinobacteria;Actinobacteridae;Actinomycetales;Micrococcineae;Micrococcaceae;Micrococcus;	Bacteria;Actinobacteria;Actinobacteria;Micrococcales;Micrococcaceae;Micrococcus;
AM054_006	cataagactgggataactccgggaaaccggggctaataccggataacattttgaaccgcatggttcgaaattgaaaggcggcttcggctgtcacttatggatggacccgcgtcgcattagctagttggtgaggtaacggctcaccaaggcaacgatgcgtagccgacctgagagggtgatcggccacactgggactgagacacggcccagactcctacgggaggcagcagtagggaatcttccgcaatggacgaaagtctgacggagcaacgccgcgtgagtgatgaaggctttcgggtcgtaaaactctgttgttagggaagaacaagtgctagttgaataagctggcaccttgacggtacctaaccagaaagccacggctaactacgtgccagcagc…	Bacteria;	k__Bacteria;p__Firmicutes;c__Bacilli;o__Bacillales;f__Bacillaceae;	Unclassified;	Bacteria;Firmicutes;Bacilli;Bacillales;Bacillaceae 1;Bacillus;	Bacteria;Firmicutes;Bacilli;Bacillales;Bacillaceae;Bacillus;
AM054_007	ctgcagatggggataactccgggaaaccggggctaataccgaataatcggttcttccgcatggaagaactctgaaagacggtttcggctgtcactgcaggatgggcccgcggcgcattagctagttggtggggtaacggcctaccaaggcgacgatgcgtagccgacctgagagggtgatcggccacactgggactgagacacggcccagactcctacgggaggcagcagtagggaatcttccacaatggacgaaagtctgatggagcaacgccgcgtgagcgaagaaggttttcggatcgtaaagctctgttgcgagggaagaacaagtacgggagtaactgcccgtaccttgacggtacctcgttagaaagccacggctaactacgtgccagcagcc…	Bacteria;Firmicutes;Bacilli;Bacillales;Planococcaceae;Sporosarcina;	k__Bacteria;p__Firmicutes;c__Bacilli;o__Bacillales;f__Planococcaceae;g__Sporosarcina;	Bacteria;Firmicutes;Bacilli;Bacillales;Planococcaceae;Sporosarcina;	Bacteria;Firmicutes;Bacilli;Bacillales;Planococcaceae;Sporosarcina;	Bacteria;Firmicutes;Bacilli;Bacillales;Planococcaceae;Sporosarcina;
AM054_009	cttaactctgggataagcctgggaaactgggtctaataccggataggagcgtccaccgcatggtgggtgttggaaagatttatcggttttggatggactcgcggcctatcagcttgttggtgaggtaatggctcaccaaggcgacgacgggtagccggcctgagagggtgaccggccacactgggactgagacacggcccagactcctacgggaggcagcagtggggaatattgcacaatgggcgcaagcctgatgcagcgacgccgcgtgagggatgacggccttcgggttgtaaacctctttcagtagggaagaagcgaaagtgacggtacctgcagaagaagcaccggctaactacgtgccagcagccgcggtaatacgtagggtgcgagcgttat…	Bacteria;Actinobacteria;Micrococcales;Micrococcaceae;Micrococcus;	k__Bacteria;p__Actinobacteria;c__Actinobacteria;o__Actinomycetales;f__Micrococcaceae;g__Micrococcus;s__luteus;	Unclassified;	Bacteria;"Actinobacteria";Actinobacteria;Actinobacteridae;Actinomycetales;Micrococcineae;Micrococcaceae;Micrococcus;	Bacteria;Actinobacteria;Actinobacteria;Micrococcales;Micrococcaceae;Micrococcus;
AM054_011	cccctcttcgggataacctcgggaaatcggggctaataccggatatgacttcgcaccgcatggtgtgttgtggaaagtttttcggtgggggatggactcgcggcctatcagtttgttggtgaggtaatggctcaccaaggcgatgacgggtagccggcctgagagggcgaccggccacactgggactgagacacggcccagactcctacgggaggcagcagtggggaatattgcacaatgggcgaaagcctgatgcagcgacgccgcgtgggggatgacggccttcgggttgtaaacctctttcagtagggaagaagcgaaagtgacggtacctgcagaagaagcgccggctaactacgtgccagcagccgcggtaatacgtagggcgcaagcgttgtc…	Bacteria;	k__Bacteria;p__Actinobacteria;c__Actinobacteria;o__Actinomycetales;f__Dermabacteraceae;g__Brachybacterium;	Bacteria;Actinobacteria;Actinobacteria;Micrococcales;Dermabacteraceae;Brachybacterium;	Bacteria;"Actinobacteria";Actinobacteria;Actinobacteridae;Actinomycetales;Micrococcineae;Dermabacteraceae;Brachybacterium;	Bacteria;Actinobacteria;Actinobacteria;Micrococcales;Dermabacteraceae;Brachybacterium;
AM054_012	cttgactctgggataagcctgggaaactgggtctaatactggatatgacttctcaccgcatggtggggggtggaaagatttattggtcttggatggactcgcggcctatcagcttgttggtgaggtaatggctcaccaaggcgacgacgggtagccggcctgagagggtgaccggccacactgggactgagacacggcccagactcctacgggaggcagcagtggggaatattgcacaatgggcgcaagcctgatgcagcgacgccgcgtgagggatgacggccttcgggttgtaaacctctttcagtagggaagaagcgaaagtgacggtacctgcagaagaagcgccggctaactacgtgccagcagccgcggtaatacgtagggcgcgagcgttat…	Bacteria;Actinobacteria;Micrococcales;Micrococcaceae;	k__Bacteria;p__Actinobacteria;c__Actinobacteria;o__Actinomycetales;f__Micrococcaceae;	Bacteria;Actinobacteria;Actinobacteria;Micrococcales;Micrococcaceae;Micrococcus;	Bacteria;"Actinobacteria";Actinobacteria;Actinobacteridae;Actinomycetales;Micrococcineae;Micrococcaceae;Micrococcus;	Bacteria;Actinobacteria;Actinobacteria;Micrococcales;Micrococcaceae;Micrococcus;
AM054_013	cttgactctgggataagcctgggaaactgggtctaatactggatatgacctcttgccgcatggtgggaggtggaaagatttattggtcttggatggactcgcggcctatcagcttgttggtgaggtaatggctcaccaaggcgacgacgggtagccggcctgagagggtgaccggccacactgggactgagacacggcccagactcctacgggaggcagcagtggggaatattgcacaatgggcgcaagcctgatgcagcgacgccgcgtgagggatgacggccttcgggttgtaaacctctttcagtagggaagaagcgaaagtgacggtacctgcagaagaagcgccggctaactacgtgccagcagccgcggtaatacgtagggcgcgagcgttat…	Bacteria;Actinobacteria;Micrococcales;Micrococcaceae;Micrococcus;	k__Bacteria;p__Actinobacteria;c__Actinobacteria;o__Actinomycetales;f__Micrococcaceae;	Bacteria;Actinobacteria;Actinobacteria;Micrococcales;Micrococcaceae;Micrococcus;	Bacteria;"Actinobacteria";Actinobacteria;Actinobacteridae;Actinomycetales;Micrococcineae;Micrococcaceae;Micrococcus;	Bacteria;Actinobacteria;Actinobacteria;Micrococcales;Micrococcaceae;Micrococcus;
AM054_017	cttaactctgggataagcctgggaaactgggtctaataccggataggagcgtccaccgcatggtgggtgttggaaagatttatcggttttggatggactcgcggcctatcagcttgttggtgaggtaatggctcaccaaggcgacgacgggtagccggcctgagagggtgaccggccacactgggactgagacacggcccagactcctacgggaggcagcagtggggaatattgcacaatgggcgcaagcctgatgcagcgacgccgcgtgagggatgacggccttcgggttgtaaacctctttcagtagggaagaagcgaaagtgacggtacctgcagaagaagcaccggctaactacgtgccagcagccgcggtaatacgtagggtgcgagcgttat…	Bacteria;Actinobacteria;Micrococcales;Micrococcaceae;Micrococcus;	k__Bacteria;p__Actinobacteria;c__Actinobacteria;o__Actinomycetales;f__Micrococcaceae;g__Micrococcus;s__luteus;	Unclassified;	Bacteria;"Actinobacteria";Actinobacteria;Actinobacteridae;Actinomycetales;Micrococcineae;Micrococcaceae;Micrococcus;	Bacteria;Actinobacteria;Actinobacteria;Micrococcales;Micrococcaceae;Micrococcus;
AM054_018	ctgcagatggggataactccgggaaaccggggctaataccgaataatcggttcttccgcatggaagaactctgaaagacggtttcggctgtcactgcaggatgggcccgcggcgcattagctagttggtggggtaacggcctaccaaggcgacgatgcgtagccgacctgagagggtgatcggccacactgggactgagacacggcccagactcctacgggaggcagcagtagggaatcttccacaatggacgaaagtctgatggagcaacgccgcgtgagcgaagaaggttttcggatcgtaaagctctgttgcgagggaagaacaagtacgggagtaactgcccgtaccttgacggtacctcgttagaaagccacggctaactacgtgccagcagcc…	Bacteria;Firmicutes;Bacilli;Bacillales;Planococcaceae;Sporosarcina;	k__Bacteria;p__Firmicutes;c__Bacilli;o__Bacillales;f__Planococcaceae;g__Sporosarcina;	Bacteria;Firmicutes;Bacilli;Bacillales;Planococcaceae;Sporosarcina;	Bacteria;Firmicutes;Bacilli;Bacillales;Planococcaceae;Sporosarcina;	Bacteria;Firmicutes;Bacilli;Bacillales;Planococcaceae;Sporosarcina;
AM054_019	cttaactccgggataagcctgggaaactgggtctaataccggataggagcgcctaccgcatggtgggtgttggaaagatttatcggttttggatggactcgcggcctatcagcttgttggtgaggtaatggctcaccaaggcgacgacgggtagccggcctgagagggtgaccggccacactgggactgagacacggcccagactcctacgggaggcagcagtggggaatattgcacaatgggcgaaagcctgatgcagcgacgccgcgtgagggatgacggccttcgggttgtaaacctctttcagtagggaagaagcgaaagtgacggtacctgcagaagaagcaccggctaactacgtgccagcagccgcggtaatacgtagggtgcgagcgttat…	Bacteria;	k__Bacteria;p__Actinobacteria;c__Actinobacteria;o__Actinomycetales;f__Micrococcaceae;g__Micrococcus;s__luteus;	Unclassified;	Bacteria;"Actinobacteria";Actinobacteria;Actinobacteridae;Actinomycetales;Micrococcineae;Micrococcaceae;Micrococcus;	Bacteria;Actinobacteria;Actinobacteria;Micrococcales;Micrococcaceae;Micrococcus;
AM054_020	cttaactctgggataagcctgggaaactgggtctaataccggataggagcgtccaccgcatggtgggtgttggaaagatttatcggttttggatggactcgcggcctatcagcttgttggtgaggtaatggctcaccaaggcgacgacgggtagccggcctgagagggtgaccggccacactgggactgagacacggcccagactcctacgggaggcagcagtggggaatattgcacaatgggcgcaagcctgatgcagcgacgccgcgtgagggatgacggccttcgggttgtaaacctctttcagtagggaagaagcgaaagtgacggtacctgcagaagaagcaccggctaactacgtgccagcagccgcggtaatacgtagggtgcgagcgttat…	Bacteria;Actinobacteria;Micrococcales;Micrococcaceae;Micrococcus;	k__Bacteria;p__Actinobacteria;c__Actinobacteria;o__Actinomycetales;f__Micrococcaceae;g__Micrococcus;s__luteus;	Unclassified;	Bacteria;"Actinobacteria";Actinobacteria;Actinobacteridae;Actinomycetales;Micrococcineae;Micrococcaceae;Micrococcus;	Bacteria;Actinobacteria;Actinobacteria;Micrococcales;Micrococcaceae;Micrococcus;
AM055_001	tataagactgggataacttcgggaaaccggagctaataccggataatatattgaaccgcatggttcaatagtgaaagacggttttgctgtcacttatagatggatccgcgccgcattagctagttggtaaggtaacggcttaccaaggcaacgatgcgtagccgacctgagagggtgatcggccacactggaactgagacacggtccagactcctacgggaggcagcagtagggaatcttccgcaatgggcgaaagcctgacggagcaacgccgcgtgagtgatgaaggtcttcggatcgtaaaactctgttattagggaagaacaaatgtgtaagtaactatgcacgtcttgacggtacctaatcagaaagccacggctaactacgtgccagcagccg…	Bacteria;Firmicutes;Bacilli;Bacillales;Staphylococcaceae;Staphylococcus;	k__Bacteria;p__Firmicutes;c__Bacilli;o__Bacillales;f__Staphylococcaceae;g__Staphylococcus;s__epidermidis;	Unclassified;	Bacteria;Firmicutes;Bacilli;Bacillales;Staphylococcaceae;Staphylococcus;	Bacteria;Firmicutes;Bacilli;Bacillales;Staphylococcaceae;Staphylococcus;
AM055_003	ctttgctgctcaatantcccgggaaactgggggtaataccgcatacgccctttgggggaaagatttatcggcgaaggatcggcccgcgttggattaggtagttggtggggtaatggcccaccaagccgacgatccatagctggtttgagaggatgatcagccacactgggactgagacacggcccagactcctacgggaggcagcagtggggaatcttagacaatgggggcaaccctgatctagccatgccgcgtgagtgatgaaggccttagggttgtaaagctctttcagctgggaagataatgacggtaccagcagaagaagccccggctaactccgtgccagcagccgcggtaatacggagggggctagcgttgttcggaattactgggcgtaaa…	Bacteria;environmental samples;	k__Bacteria;p__Proteobacteria;c__Alphaproteobacteria;o__Rhodobacterales;f__Rhodobacteraceae;g__Paracoccus;s__aminovorans;	Unclassified;	Bacteria;"Proteobacteria";Alphaproteobacteria;Rhodobacterales;Rhodobacteraceae;Paracoccus;	Bacteria;Proteobacteria;Alphaproteobacteria;Rhodobacterales;Rhodobacteraceae;Paracoccus;
AM056_001	cttaactctgggataagcctgggaaactgggtctaataccggataggagcgtccaccgcatggtgggtgttggaaagatttatcggttttggatggactcgcggcctatcagcttgttggtgaggtaatggctcaccaaggcgacgacgggtagccggcctgagagggtgaccggccacactgggactgagacacggcccagactcctacgggaggcagcagtggggaatattgcacaatgggcgaaagcctgatgcagcgacgccgcgtgagggatgacggccttcgggttgtaaacctctttcagtagggaagaagcgaaagtgacggtacctgcagaagaagcaccggctaactacgtgccagcagccgcggtaatacgtagggtgcgagcgttat…	Bacteria;Actinobacteria;Micrococcales;Micrococcaceae;Micrococcus;	k__Bacteria;p__Actinobacteria;c__Actinobacteria;o__Actinomycetales;f__Micrococcaceae;g__Micrococcus;s__luteus;	Bacteria;Actinobacteria;Actinobacteria;Micrococcales;Micrococcaceae;Micrococcus;	Bacteria;"Actinobacteria";Actinobacteria;Actinobacteridae;Actinomycetales;Micrococcineae;Micrococcaceae;Micrococcus;	Bacteria;Actinobacteria;Actinobacteria;Micrococcales;Micrococcaceae;Micrococcus;
AM056_002	ctgaantgggagatcttaatggggaactgggtctaataccggataggagcgtccaccgcatggtgggtgttggaaagatttatcggttttggatggactcgcggcctatcagcttgttggtgaggtaatggctcaccaaggcgacgacgggtagccggcctgagagggtgaccggccacactgggactgagacacggcccagactcctacgggaggcagcagtggggaatattgcacaatgggcgaaagcctgatgcagcgacgccgcgtgagggatgacggccttcgggttgtaaacctctttcagtagggaagaagcgaaagtgacggtacctgcagaagaagcaccggctaactacgtgccagcagccgcggtaatacgtagggtgcgagcgttat…	Bacteria;Actinobacteria;Micrococcales;Micrococcaceae;Micrococcus;	k__Bacteria;p__Actinobacteria;c__Actinobacteria;o__Actinomycetales;f__Micrococcaceae;g__Micrococcus;s__luteus;	Unclassified;	Bacteria;"Actinobacteria";Actinobacteria;Actinobacteridae;Actinomycetales;Micrococcineae;Micrococcaceae;Micrococcus;	Bacteria;Actinobacteria;Actinobacteria;Micrococcales;Micrococcaceae;Micrococcus;
AM056_003	cttaactctgggataagcctgggaaactgggtctaataccggataggagcgtccaccgcatggtgggtgttggaaagatttatcggttttggatggactcgcggcctatcagcttgttggtgaggtaatggctcaccaaggcgacgacgggtagccggcctgagagggtgaccggccacactgggactgagacacggcccagactcctacgggaggcagcagtggggaatattgcacaatgggcgaaagcctgatgcagcgacgccgcgtgagggatgacggccttcgggttgtaaacctctttcagtagggaagaagcgaaagtgacggtacctgcagaagaagcaccggctaactacgtgccagcagccgcggtaatacgtagggtgcgagcgttat…	Bacteria;Actinobacteria;Micrococcales;Micrococcaceae;	k__Bacteria;p__Actinobacteria;c__Actinobacteria;o__Actinomycetales;f__Micrococcaceae;g__Micrococcus;s__luteus;	Bacteria;Actinobacteria;Actinobacteria;Micrococcales;Micrococcaceae;Micrococcus;	Bacteria;"Actinobacteria";Actinobacteria;Actinobacteridae;Actinomycetales;Micrococcineae;Micrococcaceae;Micrococcus;	Bacteria;Actinobacteria;Actinobacteria;Micrococcales;Micrococcaceae;Micrococcus;
AM056_004	cttaactctgggataagcctgggaaactgggtctaataccggataggagcgtccaccgcatggtgggtgttggaaagatttatcggttttggatggactcgcggcctatcagcttgttggtgaggtaatggctcaccaaggcgacgacgggtagccggcctgagagggtgaccggccacactgggactgagacacggcccagactcctacgggaggcagcagtggggaatattgcacaatgggcgaaagcctgatgcagcgacgccgcgtgagggatgacggccttcgggttgtaaacctctttcagtagggaagaagcgaaagtgacggtacctgcagaagaagcaccggctaactacgtgccagcagccgcggtaatacgtagggtgcgagcgttat…	Bacteria;Actinobacteria;Micrococcales;Micrococcaceae;	k__Bacteria;p__Actinobacteria;c__Actinobacteria;o__Actinomycetales;f__Micrococcaceae;g__Micrococcus;s__luteus;	Bacteria;Actinobacteria;Actinobacteria;Micrococcales;Micrococcaceae;Micrococcus;	Bacteria;"Actinobacteria";Actinobacteria;Actinobacteridae;Actinomycetales;Micrococcineae;Micrococcaceae;Micrococcus;	Bacteria;Actinobacteria;Actinobacteria;Micrococcales;Micrococcaceae;Micrococcus;
AM056_006	cttaactctgggataagcctgggaaactgggtctaataccggataggagcgtccaccgcatggtgggtgttggaaagatttatcggttttggatggactcgcggcctatcagcttgttggtgaggtaatggctcaccaaggcgacgacgggtagccggcctgagagggtgaccggccacactgggactgagacacggcccagactcctacgggaggcagcagtggggaatattgcacaatgggcgcaagcctgatgcagcgacgccgcgtgagggatgacggccttcgggttgtaaacctctttcagtagggaagaagcgaaagtgacggtacctgcagaagaagcaccggctaactacgtgccagcagccgcggtaatacgtagggtgcgagcgttat…	Bacteria;Actinobacteria;Micrococcales;Micrococcaceae;Micrococcus;	k__Bacteria;p__Actinobacteria;c__Actinobacteria;o__Actinomycetales;f__Micrococcaceae;g__Micrococcus;s__luteus;	Unclassified;	Bacteria;"Actinobacteria";Actinobacteria;Actinobacteridae;Actinomycetales;Micrococcineae;Micrococcaceae;Micrococcus;	Bacteria;Actinobacteria;Actinobacteria;Micrococcales;Micrococcaceae;Micrococcus;
AM056_007	cttgactctgggataagcctgggaaactgggtctaatactggatacgacatgtcaccgcatggtggcgtgtggaaagggttttactggttttggatgggctcacggcctatcagcttgttggtggggtaatggctcaccaaggcgacgacgggtagccggcctgagagggtgaccggccacactgggactgagacacggcccagactcctacgggaggcagcagtggggaatattgcacaatgggcgaaagcctgatgcagcgacgccgcgtgagggatgacggccttcgggttgtaaacctctttcagcacggaagaagcgaaagtgacggtacgtgcagaagaagcgccggctaactacgtgccagcagccgcggtaatacgtagggcgcaagcgtt…	Bacteria;	k__Bacteria;p__Actinobacteria;c__Actinobacteria;o__Actinomycetales;f__Micrococcaceae;g__Kocuria;s__rhizophila;	Bacteria;Actinobacteria;Actinobacteria;Micrococcales;Micrococcaceae;Kocuria;	Bacteria;"Actinobacteria";Actinobacteria;Actinobacteridae;Actinomycetales;Micrococcineae;Micrococcaceae;Kocuria;	Bacteria;Actinobacteria;Actinobacteria;Micrococcales;Micrococcaceae;Kocuria;
AM056_008	cttaactctgggataagcctgggaaactgggtctaataccggataggagcgcccaccgcatggtgggtgttggaaagatttatcggttttggatggactcgcggcctatcagcttgttggtgaggtaatggctcaccaaggcgacgacgggtagccggcctgagagggtgaccggccacactgggactgagacacggcccagactcctacgggaggcagcagtggggaatattgcacaatgggcgcaagcctgatgcagcgacgccgcgtgagggatgacggccttcgggttgtaaacctctttcagtagggaagaagcgaaagtgacggtacctgcagaagaagcaccggctaactacgtgccagcagccgcggtaatacgtagggtgcgagcgttat…	Bacteria;Actinobacteria;Micrococcales;Micrococcaceae;Micrococcus;	k__Bacteria;p__Actinobacteria;c__Actinobacteria;o__Actinomycetales;f__Micrococcaceae;g__Micrococcus;s__luteus;	Unclassified;	Bacteria;"Actinobacteria";Actinobacteria;Actinobacteridae;Actinomycetales;Micrococcineae;Micrococcaceae;Micrococcus;	Bacteria;Actinobacteria;Actinobacteria;Micrococcales;Micrococcaceae;Micrococcus;
AM056_009	ctaacaaggtagattttaatcgggaancggtacttctacccgatgggaacgtccaccgcatggtgggtgttggaaagatttatcggttttggatggactcgcggcctatcagcttgttggtgaggtaatggctcaccaaggcgacgacgggtagccggcctgagagggtgaccggccacactgggactgagacacggcccagactcctacgggaggcagcagtggggaatattgcacaatgggcgaaagcctgatgcagcgacgccgcgtgagggatgacggccttcgggttgtaaacctctttcagtagggaagaagcgaaagtgacggtacctgcagaagaagcaccggctaactacgtgccagcagccgcggtaatacgtagggtgcgagcgttat…	Bacteria;Actinobacteria;Micrococcales;Micrococcaceae;Micrococcus;	k__Bacteria;p__Actinobacteria;c__Actinobacteria;o__Actinomycetales;f__Micrococcaceae;g__Micrococcus;s__luteus;	Bacteria;Actinobacteria;Actinobacteria;Micrococcales;Micrococcaceae;Micrococcus;	Bacteria;"Actinobacteria";Actinobacteria;Actinobacteridae;Actinomycetales;Micrococcineae;Micrococcaceae;Micrococcus;	Bacteria;Actinobacteria;Actinobacteria;Micrococcales;Micrococcaceae;Micrococcus;
AM056_010	cttaactctgggataagcctgggaaactgggtctaataccggataggagcgtccaccgcatggtgggtgttggaaagatttatcggttttggatggactcgcggcctatcagcttgttggtgaggtaatggctcaccaaggcgacgacgggtagccggcctgagagggtgaccggccacactgggactgagacacggcccagactcctacgggaggcagcagtggggaatattgcacaatgggcgcaagcctgatgcagcgacgccgcgtgagggatgacggccttcgggttgtaaacctctttcagtagggaagaagcgaaagtgacggtacctgcagaagaagcaccggctaactacgtgccagcagccgcggtaatacgtagggtgcgagcgttat…	Bacteria;Actinobacteria;Micrococcales;Micrococcaceae;Micrococcus;	k__Bacteria;p__Actinobacteria;c__Actinobacteria;o__Actinomycetales;f__Micrococcaceae;g__Micrococcus;s__luteus;	Unclassified;	Bacteria;"Actinobacteria";Actinobacteria;Actinobacteridae;Actinomycetales;Micrococcineae;Micrococcaceae;Micrococcus;	Bacteria;Actinobacteria;Actinobacteria;Micrococcales;Micrococcaceae;Micrococcus;
AM056_011	cttgactctgggataagcctgggaaactgggtctaatactggatacgacatgtcaccgcatggtggcgtgtggaaagggttttactggttttggatgggctcacggcctatcagcttgttggtggggtaatggctcaccaaggcgacgacgggtagccggcctgagagggtgaccggccacactgggactgagacacggcccagactcctacgggaggcagcagtggggaatattgcacaatgggcgaaagcctgatgcagcgacgccgcgtgagggatgacggccttcgggttgtaaacctctttcagcacggaagaagcgaaagtgacggtacgtgcagaagaagcgccggctaactacgtgccagcagccgcggtaatacgtagggcgcaagcgtt…	Bacteria;	k__Bacteria;p__Actinobacteria;c__Actinobacteria;o__Actinomycetales;f__Micrococcaceae;g__Kocuria;s__rhizophila;	Bacteria;Actinobacteria;Actinobacteria;Micrococcales;Micrococcaceae;Kocuria;	Bacteria;"Actinobacteria";Actinobacteria;Actinobacteridae;Actinomycetales;Micrococcineae;Micrococcaceae;Kocuria;	Bacteria;Actinobacteria;Actinobacteria;Micrococcales;Micrococcaceae;Kocuria;
AM056_012	cttaactctgggataagcctgggaaactgggtctaataccggataggagcgtccaccgcatggtgggtgttggaaagatttatcggttttggatggactcgcggcctatcagcttgttggtgaggtaatggctcaccaaggcgacgacgggtagccggcctgagagggtgaccggccacactgggactgagacacggcccagactcctacgggaggcagcagtggggaatattgcacaatgggcgcaagcctgatgcagcgacgccgcgtgagggatgacggccttcgggttgtaaacctctttcagtagggaagaagcgaaagtgacggtacctgcagaagaagcaccggctaactacgtgccagcagccgcggtaatacgtagggtgcgagcgttat…	Bacteria;Actinobacteria;Micrococcales;Micrococcaceae;Micrococcus;	k__Bacteria;p__Actinobacteria;c__Actinobacteria;o__Actinomycetales;f__Micrococcaceae;g__Micrococcus;s__luteus;	Unclassified;	Bacteria;"Actinobacteria";Actinobacteria;Actinobacteridae;Actinomycetales;Micrococcineae;Micrococcaceae;Micrococcus;	Bacteria;Actinobacteria;Actinobacteria;Micrococcales;Micrococcaceae;Micrococcus;
AM056_013	cttaactctgggataagcctgggaaactgggtctaataccggataggagcgcctaccgcatggtgggtgttggaaagatttatcggttttggatggactcgcggcctatcagcttgttggtgaggtaatggctcaccaaggcgacgacgggtagccggcctgagagggtgaccggccacactgggactgagacacggcccagactcctacgggaggcagcagtggggaatattgcacaatgggcgcaagcctgatgcagcgacgccgcgtgagggatgacggccttcgggttgtaaacctctttcagtagggaagaagcgaaagtgacggtacctgcagaagaagcaccggctaactacgtgccagcagccgcggtaatacgtagggtgcgagcgttat…	Bacteria;Actinobacteria;Micrococcales;Micrococcaceae;Micrococcus;	k__Bacteria;p__Actinobacteria;c__Actinobacteria;o__Actinomycetales;f__Micrococcaceae;g__Micrococcus;s__luteus;	Unclassified;	Bacteria;"Actinobacteria";Actinobacteria;Actinobacteridae;Actinomycetales;Micrococcineae;Micrococcaceae;Micrococcus;	Bacteria;Actinobacteria;Actinobacteria;Micrococcales;Micrococcaceae;Micrococcus;
AM056_014	cttgactctgggataagcctgggaaactgggtctaatactggatacgacatgtcaccgcatggtggcgtgtggaaagggttttactggttttggatgggctcacggcctatcagcttgttggtggggtaatggctcaccaaggcgacgacgggtagccggcctgagagggtgaccggccacactgggactgagacacggcccagactcctacgggaggcagcagtggggaatattgcacaatgggcgaaagcctgatgcagcgacgccgcgtgagggatgacggccttcgggttgtaaacctctttcagcacggaagaagcgaaagtgacggtacgtgcagaagaagcgccggctaactacgtgccagcagccgcggtaatacgtagggcgcaagcgtt…	Bacteria;	k__Bacteria;p__Actinobacteria;c__Actinobacteria;o__Actinomycetales;f__Micrococcaceae;g__Kocuria;s__rhizophila;	Bacteria;Actinobacteria;Actinobacteria;Micrococcales;Micrococcaceae;Kocuria;	Bacteria;"Actinobacteria";Actinobacteria;Actinobacteridae;Actinomycetales;Micrococcineae;Micrococcaceae;Kocuria;	Bacteria;Actinobacteria;Actinobacteria;Micrococcales;Micrococcaceae;Kocuria;
AM056_015	tataagactgggataacttcgggaaaccggagctaataccggataatatattgaaccgcatggttcaatagtgaaagacggttttgctgtcacttatagatggatccgcgccgcattagctagttggtaaggtaacggcttaccaaggcaacgatgcgtagccgacctgagagggtgatcggccacactggaactgagacacggtccagactcctacgggaggcagcagtagggaatcttccgcaatgggcgaaagcctgacggagcaacgccgcgtgagtgatgaaggtcttcggatcgtaaaactctgttattagggaagaacaaatgtgtaagtaactatgcacgtcttgacggtacctaatcagaaagccacggctaactacgtgccagcagccg…	Bacteria;	k__Bacteria;p__Firmicutes;c__Bacilli;o__Bacillales;f__Staphylococcaceae;g__Staphylococcus;s__epidermidis;	Unclassified;	Bacteria;Firmicutes;Bacilli;Bacillales;Staphylococcaceae;Staphylococcus;	Bacteria;Firmicutes;Bacilli;Bacillales;Staphylococcaceae;Staphylococcus;
AM056_016	cttaactctgggataagcctgggaaactgggtctaataccggataggagcgtccaccgcatggtgggtgttggaaagatttatcggttttggatggactcgcggcctatcagcttgttggtgaggtaatggctcaccaaggcgacgacgggtagccggcctgagagggtgaccggccacactgggactgagacacggcccagactcctacgggaggcagcagtggggaatattgcacaatgggcgaaagcctgatgcagcgacgccgcgtgagggatgacggccttcgggttgtaaacctctttcagtagggaagaagcgaaagtgacggtacctgcagaagaagcaccggctaactacgtgccagcagccgcggtaatacgtagggtgcgagcgttat…	Bacteria;Actinobacteria;Micrococcales;Micrococcaceae;Micrococcus;	k__Bacteria;p__Actinobacteria;c__Actinobacteria;o__Actinomycetales;f__Micrococcaceae;g__Micrococcus;s__luteus;	Unclassified;	Bacteria;"Actinobacteria";Actinobacteria;Actinobacteridae;Actinomycetales;Micrococcineae;Micrococcaceae;Micrococcus;	Bacteria;Actinobacteria;Actinobacteria;Micrococcales;Micrococcaceae;Micrococcus;
AM056_017	cttaactctgggataagcctgggaaactgggtctaataccggataggagcgtccaccgcatggtgggtgttggaaagatttatcggttttggatggactcgcggcctatcagcttgttggtgaggtaatggctcaccaaggcgacgacgggtagccggcctgagagggtgaccggccacactgggactgagacacggcccagactcctacgggaggcagcagtggggaatattgcacaatgggcgcaagcctgatgcagcgacgccgcgtgagggatgacggccttcgggttgtaaacctctttcagtagggaagaagcgaaagtgacggtacctgcagaagaagcaccggctaactacgtgccagcagccgcggtaatacgtagggtgcgagcgttat…	Bacteria;Actinobacteria;Micrococcales;Micrococcaceae;Micrococcus;	k__Bacteria;p__Actinobacteria;c__Actinobacteria;o__Actinomycetales;f__Micrococcaceae;g__Micrococcus;s__luteus;	Unclassified;	Bacteria;"Actinobacteria";Actinobacteria;Actinobacteridae;Actinomycetales;Micrococcineae;Micrococcaceae;Micrococcus;	Bacteria;Actinobacteria;Actinobacteria;Micrococcales;Micrococcaceae;Micrococcus;
AM056_018	cttaactctgggataagcctgggaaactgggtctaataccggataggagcgtccaccgcatggtgggtgttggaaagatttatcggttttggatggactcgcggcctatcagcttgttggtgaggtaatggctcaccaaggcgacgacgggtagccggcctgagagggtgaccggccacactgggactgagacacggcccagactcctacgggaggcagcagtggggaatattgcacaatgggcgcaagcctgatgcagcgacgccgcgtgagggatgacggccttcgggttgtaaacctctttcagtagggaagaagcgaaagtgacggtacctgcagaagaagcaccggctaactacgtgccagcagccgcggtaatacgtagggtgcgagcgttat…	Bacteria;Actinobacteria;Micrococcales;Micrococcaceae;Micrococcus;	k__Bacteria;p__Actinobacteria;c__Actinobacteria;o__Actinomycetales;f__Micrococcaceae;g__Micrococcus;s__luteus;	Unclassified;	Bacteria;"Actinobacteria";Actinobacteria;Actinobacteridae;Actinomycetales;Micrococcineae;Micrococcaceae;Micrococcus;	Bacteria;Actinobacteria;Actinobacteria;Micrococcales;Micrococcaceae;Micrococcus;
AM056_019	tataagactgggataacttcgggaaaccggagctaataccggataatatattgaaccgcatggttcaatagtgaaagacggttttgctgtcacttatagatggatccgcgccgcattagctagttggtaaggtaacggcttaccaaggcaacgatgcgtagccgacctgagagggtgatcggccacactggaactgagacacggtccagactcctacgggaggcagcagtagggaatcttccgcaatgggcgaaagcctgacggagcaacgccgcgtgagtgatgaaggtcttcggatcgtaaaactctgttattagggaagaacaaatgtgtaagtaactatgcacgtcttgacggtacctaatcagaaagccacggctaactacgtgccagcagccg…	Bacteria;	k__Bacteria;p__Firmicutes;c__Bacilli;o__Bacillales;f__Staphylococcaceae;g__Staphylococcus;s__epidermidis;	Unclassified;	Bacteria;Firmicutes;Bacilli;Bacillales;Staphylococcaceae;Staphylococcus;	Bacteria;Firmicutes;Bacilli;Bacillales;Staphylococcaceae;Staphylococcus;
AM056_020	cttaactctgggataagcctgggaaactgggtctaataccggataggagcgtccaccgcatggtgggtgttggaaagatttatcggttttggatggactcgcggcctatcagcttgttggtgaggtaatggctcaccaaggcgacgacgggtagccggcctgagagggtgaccggccacactgggactgagacacggcccagactcctacgggaggcagcagtggggaatattgcacaatgggcgaaagcctgatgcagcgacgccgcgtgagggatgacggccttcgggttgtaaacctctttcagtagggaagaagcgaaagtgacggtacctgcagaagaagcaccggctaactacgtgccagcagccgcggtaatacgtagggtgcgagcgttat…	Bacteria;Actinobacteria;Micrococcales;Micrococcaceae;	k__Bacteria;p__Actinobacteria;c__Actinobacteria;o__Actinomycetales;f__Micrococcaceae;g__Micrococcus;s__luteus;	Bacteria;Actinobacteria;Actinobacteria;Micrococcales;Micrococcaceae;Micrococcus;	Bacteria;"Actinobacteria";Actinobacteria;Actinobacteridae;Actinomycetales;Micrococcineae;Micrococcaceae;Micrococcus;	Bacteria;Actinobacteria;Actinobacteria;Micrococcales;Micrococcaceae;Micrococcus;
AM056_021	tataagactgggataacttcgggaaaccggagctaataccggataatatattgaaccgcatggttcaatagtgaaagacggttttgctgtcacttatagatggatccgcgccgcattagctagttggtaaggtaacggcttaccaaggcaacgatgcgtagccgacctgagagggtgatcggccacactggaactgagacacggtccagactcctacgggaggcagcagtagggaatcttccgcaatgggcgaaagcctgacggagcaacgccgcgtgagtgatgaaggtcttcggatcgtaaaactctgttattagggaagaacaaatgtgtaagtaactatgcacgtcttgacggtacctaatcagaaagccacggctaactacgtgccagcagccg…	Bacteria;	k__Bacteria;p__Firmicutes;c__Bacilli;o__Bacillales;f__Staphylococcaceae;g__Staphylococcus;s__epidermidis;	Unclassified;	Bacteria;Firmicutes;Bacilli;Bacillales;Staphylococcaceae;Staphylococcus;	Bacteria;Firmicutes;Bacilli;Bacillales;Staphylococcaceae;Staphylococcus;
AM057_001	cttaactctgggataagcctgggaaactgggtctaataccggataggagcgtccaccgcatggtgggtgttggaaagatttatcggttttggatggactcgcggcctatcagcttgttggtgaggtaatggctcaccaaggcgacgacgggtagccggcctgagagggtgaccggccacactgggactgagacacggcccagactcctacgggaggcagcagtggggaatattgcacaatgggcgcaagcctgatgcagcgacgccgcgtgagggatgacggccttcgggttgtaaacctctttcagtagggaagaagcgaaagtgacggtacctgcagaagaagcaccggctaactacgtgccagcagccgcggtaatacgtagggtgcgagcgttat…	Bacteria;Actinobacteria;Micrococcales;Micrococcaceae;Micrococcus;	k__Bacteria;p__Actinobacteria;c__Actinobacteria;o__Actinomycetales;f__Micrococcaceae;g__Micrococcus;s__luteus;	Unclassified;	Bacteria;"Actinobacteria";Actinobacteria;Actinobacteridae;Actinomycetales;Micrococcineae;Micrococcaceae;Micrococcus;	Bacteria;Actinobacteria;Actinobacteria;Micrococcales;Micrococcaceae;Micrococcus;
AM057_002	cttaactctgggataagcctgggaaactgggtctaataccggataggagcgtccaccgcatggtgggtgttggaaagatttatcggttttggatggactcgcggcctatcagcttgttggtgaggtaatggctcaccaaggcgacgacgggtagccggcctgagagggtgaccggccacactgggactgagacacggcccagactcctacgggaggcagcagtggggaatattgcacaatgggcgaaagcctgatgcagcgacgccgcgtgagggatgacggccttcgggttgtaaacctctttcagtagggaagaagcgaaagtgacggtacctgcagaagaagcaccggctaactacgtgccagcagccgcggtaatacgtagggtgcgagcgttat…	Bacteria;Actinobacteria;Micrococcales;Micrococcaceae;	k__Bacteria;p__Actinobacteria;c__Actinobacteria;o__Actinomycetales;f__Micrococcaceae;g__Micrococcus;s__luteus;	Bacteria;Actinobacteria;Actinobacteria;Micrococcales;Micrococcaceae;Micrococcus;	Bacteria;"Actinobacteria";Actinobacteria;Actinobacteridae;Actinomycetales;Micrococcineae;Micrococcaceae;Micrococcus;	Bacteria;Actinobacteria;Actinobacteria;Micrococcales;Micrococcaceae;Micrococcus;
AM057_003	tataagactgggataacttcgggaaaccggagctaataccggataatatattgaaccgcatggttcaatagtgaaagacggttttgctgtcacttatagatggatccgcgccgcattagctagttggtaaggtaacggcttaccaaggcaacgatgcgtagccgacctgagagggtgatcggccacactggaactgagacacggtccagactcctacgggaggcagcagtagggaatcttccgcaatgggcgaaagcctgacggagcaacgccgcgtgagtgatgaaggtcttcggatcgtaaaactctgttattagggaagaacaaatgtgtaagtaactatgcacgtcttgacggtacctaatcagaaagccacggctaactacgtgccagcagccg…	Bacteria;Firmicutes;Bacilli;Bacillales;Staphylococcaceae;Staphylococcus;	k__Bacteria;p__Firmicutes;c__Bacilli;o__Bacillales;f__Staphylococcaceae;g__Staphylococcus;s__epidermidis;	Unclassified;	Bacteria;Firmicutes;Bacilli;Bacillales;Staphylococcaceae;Staphylococcus;	Bacteria;Firmicutes;Bacilli;Bacillales;Staphylococcaceae;Staphylococcus;
AM057_004	ctggactctgggataagcgctggaaacggcgtctaatactggatatgagccccttccgcatggtgggggttggaaagattttttggtctgggatgggctcgcggcctatcagcttgttggtgaggtaatggctcaccaaggcgtcgacgggtagccggcctgagagggtgaccggccacactgggactgagacacggcccagactcctacgggaggcagcagtggggaatattgcacaatgggcggaagcctgatgcagcaacgccgcgtgagggatgacggccttcgggttgtaaacctcttttagcagggaagaagcgagagtgacggtacctgcagaaaaagcgccggctaactacgtgccagcagccgcggtaatacgtagggcgcaagcgttat…	Bacteria;Actinobacteria;Micrococcales;Microbacteriaceae;Microbacterium;	k__Bacteria;p__Actinobacteria;c__Actinobacteria;o__Actinomycetales;f__Microbacteriaceae;g__Microbacterium;s__chocolatum;	Unclassified;	Bacteria;"Actinobacteria";Actinobacteria;Actinobacteridae;Actinomycetales;Micrococcineae;Microbacteriaceae;Microbacterium;	Bacteria;Actinobacteria;Actinobacteria;Micrococcales;Microbacteriaceae;Microbacterium;
AM057_005	tagtagtgggggatagctcggggaaactcgaattaataccgcatacgacctacgggtgaaagggggcgcaagctcttgctattagatgagcctaaatcagattagctagttggtggggtaaaggcccaccaaggcgacgatctgtaactggtctgagaggatgatcagtcacaccggaactgagacacggtccggactcctacgggaggcagcagtggggaatattggacaatgggggcaaccctgatccagccatgccgcgtgtgtgaagaaggccttttggttgtaaagcactttaagcagggaggagaggctaatggttaatacccattagattagacgttacctgcagaataagcaccggctaactctgtgccagcagccgcggtaatacagagg…	Unclassified;	Unclassified;	Unclassified;	Bacteria;"Proteobacteria";Gammaproteobacteria;Pseudomonadales;Moraxellaceae;Enhydrobacter;	Bacteria;Proteobacteria;Gammaproteobacteria;Pseudomonadales;Moraxellaceae;Enhydrobacter;
AM057_006	ctgaantggtagatcttaatggggaactgggactaataccggataggaacgtctaccgcatggtgggtgttggaaagatttatcggttttggatggactcgcggcctatcagcttgttggtgaggtaatggctcaccaaggcgacgacgggtagccggcctgagagggtgaccggccacactgggactgagacacggcccagactcctacgggaggcagcagtggggaatattgcacaatgggcgaaagcctgatgcagcgacgccgcgtgagggatgacggccttcgggttgtaaacctctttcagtagggaagaagcgaaagtgacggtacctgcagaagaagcaccggctaactacgtgccagcagccgcggtaatacgtagggtgcgagcgttat…	Bacteria;Actinobacteria;Micrococcales;Micrococcaceae;Micrococcus;	k__Bacteria;p__Actinobacteria;c__Actinobacteria;o__Actinomycetales;f__Micrococcaceae;g__Micrococcus;s__luteus;	Unclassified;	Bacteria;"Actinobacteria";Actinobacteria;Actinobacteridae;Actinomycetales;Micrococcineae;Micrococcaceae;Micrococcus;	Bacteria;Actinobacteria;Actinobacteria;Micrococcales;Micrococcaceae;Micrococcus;
AM058_001	cttaactctgggataagcctgggaaactgggtctaataccggataggagcgtccaccgcatggtgggtgttggaaagatttatcggttttggatggactcgcggcctatcagcttgttggtgaggtaatggctcaccaaggcgacgacgggtagccggcctgagagggtgaccggccacactgggactgagacacggcccagactcctacgggaggcagcagtggggaatattgcacaatgggcgcaagcctgatgcagcgacgccgcgtgagggatgacggccttcgggttgtaaacctctttcagtagggaagaagcgaaagtgacggtacctgcagaagaagcaccggctaactacgtgccagcagccgcggtaatacgtagggtgcgagcgttat…	Bacteria;Actinobacteria;Micrococcales;Micrococcaceae;	k__Bacteria;p__Actinobacteria;c__Actinobacteria;o__Actinomycetales;f__Micrococcaceae;g__Micrococcus;s__luteus;	Unclassified;	Bacteria;"Actinobacteria";Actinobacteria;Actinobacteridae;Actinomycetales;Micrococcineae;Micrococcaceae;Micrococcus;	Bacteria;Actinobacteria;Actinobacteria;Micrococcales;Micrococcaceae;Micrococcus;
AM058_002	cttaactctgggataagcctgggaaactgggtctaataccggataggagcgtccaccgcatggtgggtgttggaaagatttatcggttttggatggactcgcggcctatcagcttgttggtgaggtaatggctcaccaaggcgacgacgggtagccggcctgagagggtgaccggccacactgggactgagacacggcccagactcctacgggaggcagcagtggggaatattgcacaatgggcgcaagcctgatgcagcgacgccgcgtgagggatgacggccttcgggttgtaaacctctttcagtagggaagaagcgaaagtgacggtacctgcagaagaagcaccggctaactacgtgccagcagccgcggtaatacgtagggtgcgagcgttat…	Bacteria;Actinobacteria;Micrococcales;Micrococcaceae;	k__Bacteria;p__Actinobacteria;c__Actinobacteria;o__Actinomycetales;f__Micrococcaceae;g__Micrococcus;s__luteus;	Unclassified;	Bacteria;"Actinobacteria";Actinobacteria;Actinobacteridae;Actinomycetales;Micrococcineae;Micrococcaceae;Micrococcus;	Bacteria;Actinobacteria;Actinobacteria;Micrococcales;Micrococcaceae;Micrococcus;
AM058_003	cttaactctgggataagcctgggaaactgggtctaataccggataggagcgtccaccgcatggtgggtgttggaaagatttatcggttttggatggactcgcggcctatcagcttgttggtgaggtaatggctcaccaaggcgacgacgggtagccggcctgagagggtgaccggccacactgggactgagacacggcccagactcctacgggaggcagcagtggggaatattgcacaatgggcgcaagcctgatgcagcgacgccgcgtgagggatgacggccttcgggttgtaaacctctttcagtagggaagaagcgaaagtgacggtacctgcagaagaagcaccggctaactacgtgccagcagccgcggtaatacgtagggtgcgagcgttat…	Bacteria;Actinobacteria;Micrococcales;Micrococcaceae;Micrococcus;	k__Bacteria;p__Actinobacteria;c__Actinobacteria;o__Actinomycetales;f__Micrococcaceae;g__Micrococcus;s__luteus;	Unclassified;	Bacteria;"Actinobacteria";Actinobacteria;Actinobacteridae;Actinomycetales;Micrococcineae;Micrococcaceae;Micrococcus;	Bacteria;Actinobacteria;Actinobacteria;Micrococcales;Micrococcaceae;Micrococcus;
AM058_005	tataagactgggataacttcgggaaaccggagctaataccggataatatattgaaccgcatggttcaatagtgaaagacggttttgctgtcacttatagatggatccgcgccgcattagctagttggtaaggtaacggcttaccaaggcaacgatgcgtagccgacctgagagggtgatcggccacactggaactgagacacggtccagactcctacgggaggcagcagtagggaatcttccgcaatgggcgaaagcctgacggagcaacgccgcgtgagtgatgaaggtcttcggatcgtaaaactctgttattagggaagaacaaatgtgtaagtaactatgcacgtcttgacggtacctaatcagaaagccacggctaactacgtgccagcagccg…	Bacteria;Firmicutes;Bacilli;Bacillales;Staphylococcaceae;Staphylococcus;	k__Bacteria;p__Firmicutes;c__Bacilli;o__Bacillales;f__Staphylococcaceae;g__Staphylococcus;s__epidermidis;	Unclassified;	Bacteria;Firmicutes;Bacilli;Bacillales;Staphylococcaceae;Staphylococcus;	Bacteria;Firmicutes;Bacilli;Bacillales;Staphylococcaceae;Staphylococcus;
AM058_006	cttaactctgggataagcctgggaaactgggtctaataccggataggagcgtccaccgcatggtgggtgttggaaagatttatcggttttggatggactcgcggcctatcagcttgttggtgaggtaatggctcaccaaggcgacgacgggtagccggcctgagagggtgaccggccacactgggactgagacacggcccagactcctacgggaggcagcagtggggaatattgcacaatgggcgcaagcctgatgcagcgacgccgcgtgagggatgacggccttcgggttgtaaacctctttcagtagggaagaagcgaaagtgacggtacctgcagaagaagcaccggctaactacgtgccagcagccgcggtaatacgtagggtgcgagcgttat…	Bacteria;Actinobacteria;Micrococcales;Micrococcaceae;	k__Bacteria;p__Actinobacteria;c__Actinobacteria;o__Actinomycetales;f__Micrococcaceae;g__Micrococcus;s__luteus;	Unclassified;	Bacteria;"Actinobacteria";Actinobacteria;Actinobacteridae;Actinomycetales;Micrococcineae;Micrococcaceae;Micrococcus;	Bacteria;Actinobacteria;Actinobacteria;Micrococcales;Micrococcaceae;Micrococcus;
AM058_008	tataagactgggataacttcgggaaaccggagctaataccggataacatgttgaaccgcatggttcaacagtgaaagacggtcttgctgtcacttatagatggatccgcgccgcattagctagttggtaaggtaacggcttaccaaggcaacgatgcgtagccgacctgagagggtgatcggccacactggaactgagacacggtccagactcctacgggaggcagcagtagggaatcttccgcaatgggcgaaagcctgacggagcaacgccgcgtgagtgaagaaggtcttcggatcgtaaaactctgttattagggaagaacaaatgtgtaagtaactatgcacgtcttgacggtacctaatcagaaagccacggctaactacgtgccagcagccg…	Bacteria;	k__Bacteria;p__Firmicutes;c__Bacilli;o__Bacillales;f__Staphylococcaceae;g__Staphylococcus;	Unclassified;	Bacteria;Firmicutes;Bacilli;Bacillales;Staphylococcaceae;Staphylococcus;	Bacteria;Firmicutes;Bacilli;Bacillales;Staphylococcaceae;Staphylococcus;
AM058_009	cttaactctgggataagcctgggaaactgggtctaataccggataggagcgtccaccgcatggtgggtgttggaaagatttatcggttttggatggactcgcggcctatcagcttgttggtgaggtaatggctcaccaaggcgacgacgggtagccggcctgagagggtgaccggccacactgggactgagacacggcccagactcctacgggaggcagcagtggggaatattgcacaatgggcgcaagcctgatgcagcgacgccgcgtgagggatgacggccttcgggttgtaaacctctttcagtagggaagaagcgaaagtgacggtacctgcagaagaagcaccggctaactacgtgccagcagccgcggtaatacgtagggtgcgagcgttat…	Bacteria;Actinobacteria;Micrococcales;Micrococcaceae;Micrococcus;	k__Bacteria;p__Actinobacteria;c__Actinobacteria;o__Actinomycetales;f__Micrococcaceae;g__Micrococcus;s__luteus;	Unclassified;	Bacteria;"Actinobacteria";Actinobacteria;Actinobacteridae;Actinomycetales;Micrococcineae;Micrococcaceae;Micrococcus;	Bacteria;Actinobacteria;Actinobacteria;Micrococcales;Micrococcaceae;Micrococcus;
AM058_010	tataagactgggataacttcgggaaaccggagctaataccggataacatgttgaaccgcatggttcaacagtgaaagacggtcttgctgtcacttatagatggatccgcgccgcattagctagttggtaaggtaacggcttaccaaggcaacgatgcgtagccgacctgagagggtgatcggccacactggaactgagacacggtccagactcctacgggaggcagcagtagggaatcttccgcaatgggcgaaagcctgacggagcaacgccgcgtgagtgaagaaggtcttcggatcgtaaaactctgttattagggaagaacaaatgtgtaagtaactatgcacgtcttgacggtacctaatcagaaagccacggctaactacgtgccagcagccg…	Bacteria;	k__Bacteria;p__Firmicutes;c__Bacilli;o__Bacillales;f__Staphylococcaceae;g__Staphylococcus;	Unclassified;	Bacteria;Firmicutes;Bacilli;Bacillales;Staphylococcaceae;Staphylococcus;	Bacteria;Firmicutes;Bacilli;Bacillales;Staphylococcaceae;Staphylococcus;
AM058_012	tataagactgggataacttcgggaaaccggagctaataccggataacatgttgaaccgcatggttcaacagtgaaagacggtcttgctgtcacttatagatggatccgcgccgcattagctagttggtaaggtaacggcttaccaaggcaacgatgcgtagccgacctgagagggtgatcggccacactggaactgagacacggtccagactcctacgggaggcagcagtagggaatcttccgcaatgggcgaaagcctgacggagcaacgccgcgtgagtgaagaaggtcttcggatcgtaaaactctgttattagggaagaacaaatgtgtaagtaactatgcacgtcttgacggtacctaatcagaaagccacggctaactacgtgccagcagccg…	Bacteria;	k__Bacteria;p__Firmicutes;c__Bacilli;o__Bacillales;f__Staphylococcaceae;g__Staphylococcus;	Unclassified;	Bacteria;Firmicutes;Bacilli;Bacillales;Staphylococcaceae;Staphylococcus;	Bacteria;Firmicutes;Bacilli;Bacillales;Staphylococcaceae;Staphylococcus;
AM058_013	cttaactctgggataagcctgggaaactgggtctaataccggataggagcgtccaccgcatggtgggtgttggaaagatttatcggttttggatggactcgcggcctatcagcttgttggtgaggtaatggctcaccaaggcgacgacgggtagccggcctgagagggtgaccggccacactgggactgagacacggcccagactcctacgggaggcagcagtggggaatattgcacaatgggcgaaagcctgatgcagcgacgccgcgtgagggatgacggccttcgggttgtaaacctctttcagtagggaagaagcgaaagtgacggtacctgcagaagaagcaccggctaactacgtgccagcagccgcggtaatacgtagggtgcgagcgttat…	Bacteria;Actinobacteria;Micrococcales;Micrococcaceae;	k__Bacteria;p__Actinobacteria;c__Actinobacteria;o__Actinomycetales;f__Micrococcaceae;g__Micrococcus;s__luteus;	Bacteria;Actinobacteria;Actinobacteria;Micrococcales;Micrococcaceae;Micrococcus;	Bacteria;"Actinobacteria";Actinobacteria;Actinobacteridae;Actinomycetales;Micrococcineae;Micrococcaceae;Micrococcus;	Bacteria;Actinobacteria;Actinobacteria;Micrococcales;Micrococcaceae;Micrococcus;
AM058_014	cttctctacggaatagccctgggaaactgggagtaataccgtatacgccctattggggaaagatttatcggagaaggatcagcccgcgttggattaggtagttggtggggtaatggcctaccaagccgacgatccatagctggtttgagaggatgatcagccacactgggactgagacacggcccagactcctacgggaggcagcagtggggaatcttagacaatgggggcaaccctgatctagccatgccgcgtgagtgatgaaggccttagggttgtaaagctctttcagctgggaagataatgacggtaccagcagaagaagccccggctaactccgtgccagcagccgcggtaatacggagggggctagcgttgttcggaattactgggcgtaaa…	Unclassified;	k__Bacteria;p__Proteobacteria;c__Alphaproteobacteria;o__Rhodobacterales;f__Rhodobacteraceae;g__Paracoccus;s__aminovorans;	Unclassified;	Bacteria;"Proteobacteria";Alphaproteobacteria;Rhodobacterales;Rhodobacteraceae;Paracoccus;	Bacteria;Proteobacteria;Alphaproteobacteria;Rhodobacterales;Rhodobacteraceae;Paracoccus;
AM058_015	cttaactctgggataagcctgggaaactgggtctaataccggataggagcgtccaccgcatggtgggtgttggaaagatttatcggttttggatggactcgcggcctatcagcttgttggtgaggtaatggctcaccaaggcgacgacgggtagccggcctgagagggtgaccggccacactgggactgagacacggcccagactcctacgggaggcagcagtggggaatattgcacaatgggcgcaagcctgatgcagcgacgccgcgtgagggatgacggccttcgggttgtaaacctctttcagtagggaagaagcgaaagtgacggtacctgcagaagaagcaccggctaactacgtgccagcagccgcggtaatacgtagggtgcgagcgttat…	Bacteria;Actinobacteria;Micrococcales;Micrococcaceae;Micrococcus;	k__Bacteria;p__Actinobacteria;c__Actinobacteria;o__Actinomycetales;f__Micrococcaceae;g__Micrococcus;s__luteus;	Unclassified;	Bacteria;"Actinobacteria";Actinobacteria;Actinobacteridae;Actinomycetales;Micrococcineae;Micrococcaceae;Micrococcus;	Bacteria;Actinobacteria;Actinobacteria;Micrococcales;Micrococcaceae;Micrococcus;
AM058_016	tataagactgggataacttcgggaaaccggagctaataccggataatatattgaaccgcatggttcaatagtgaaagacggttttgctgtcacttatagatggatccgcgccgcattagctagttggtaaggtaacggcttaccaaggcaacgatgcgtagccgacctgagagggtgatcggccacactggaactgagacacggtccagactcctacgggaggcagcagtagggaatcttccgcaatgggcgaaagcctgacggagcaacgccgcgtgagtgatgaaggtcttcggatcgtaaaactctgttattagggaagaacaaatgtgtaagtaactatgcacgtcttgacggtacctaatcagaaagccacggctaactacgtgccagcagccg…	Bacteria;Firmicutes;Bacilli;Bacillales;Staphylococcaceae;Staphylococcus;	k__Bacteria;p__Firmicutes;c__Bacilli;o__Bacillales;f__Staphylococcaceae;g__Staphylococcus;s__epidermidis;	Unclassified;	Bacteria;Firmicutes;Bacilli;Bacillales;Staphylococcaceae;Staphylococcus;	Bacteria;Firmicutes;Bacilli;Bacillales;Staphylococcaceae;Staphylococcus;
AM058_017	tgtaagacggggataactccgggaaaccggggctaataccggataataagagaagaagcatttcttctttttgaaagtcggtttcggctgacacttacagatgagcccgcggcgcattagctagttggtgaggtaacggctcaccaaggcgacgatgcgtagccgacctgagagggtgatcggccacactgggactgagacacggcccagactcctacgggaggcagcagtagggaatcttcggcaatgggcgaaagcctgaccgagcaacgccgcgtgagcgatgaaggccttcgggtcgtaaagctctgttgttagagaagaacaagtacgagagtaactgctcgtaccttgacggtacctaaccagaaagccacggctaactacgtgccagcagcc…	Bacteria;	k__Bacteria;p__Firmicutes;c__Bacilli;o__Bacillales;	Bacteria;Firmicutes;Bacilli;Bacillales;Bacillaceae;Fictibacillus;	Bacteria;Firmicutes;Bacilli;Bacillales;Bacillaceae 1;Fictibacillus;	Bacteria;Firmicutes;Bacilli;Bacillales;Bacillaceae;Fictibacillus;
AM058_018	cctggntggggaactccatctcgggagggatgctaataccgcatacgtcctacgggagaaagcaggggatcttcggaccttgcgctaatagatgagcctaagtcggattagctagttggtggggtaaaggcctaccaaggcgacgatctgtagcgggtctgagaggatgatccgccacactgggactgagacacggcccagactcctacgggaggcagcagtggggaatattggacaatgggcgcaagcctgatccagccatgccgcgtgtgtgaagaaggccttatggttgtaaagcactttaagcgaggaggaggctactttagataatacctagagatagtggacgttactcgcagaataagcaccggctaactctgtgccagcagccgcggtaat…	Bacteria;Proteobacteria;Gammaproteobacteria;Pseudomonadales;Moraxellaceae;Acinetobacter;	Unclassified;	Unclassified;	Bacteria;"Proteobacteria";Gammaproteobacteria;Pseudomonadales;Moraxellaceae;Acinetobacter;	Bacteria;Proteobacteria;Gammaproteobacteria;Pseudomonadales;Moraxellaceae;Acinetobacter;
AM059_001	tgtaagactgggataactccgggaaaccggagctaataccggatagttccttgaaccgcatggttcaaggatgaaagacggtttcggctgtcacttacagatggacccgcggcgcattagctagttggtgaggtaacggctcaccaaggcgacgatgcgtagccgacctgagagggtgatcggccacactgggactgagacacggcccagactcctacgggaggcagcagtagggaatcttccgcaatggacgaaagtctgacggagcaacgccgcgtgagtgatgaaggttttcggatcgtaaagctctgttgttagggaagaacaagtgcaagagtaactgcttgcaccttgacggtacctaaccagaaagccacggctaactacgtgccagcagcc…	Bacteria;Firmicutes;Bacilli;Bacillales;Bacillaceae;Bacillus;	k__Bacteria;p__Firmicutes;c__Bacilli;o__Bacillales;f__Bacillaceae;g__Bacillus;	Unclassified;	Bacteria;Firmicutes;Bacilli;Bacillales;Bacillaceae 1;Bacillus;	Bacteria;Firmicutes;Bacilli;Bacillales;Bacillaceae;Bacillus;
AM059_002	tataagactgggataacttcgggaaaccggagctaataccggataacatgttgaaccgcatggttcaacagtgaaagacggtcttgctgtcacttatagatggatccgcgccgcattagctagttggtaaggtaacggcttaccaaggcaacgatgcgtagccgacctgagagggtgatcggccacactggaactgagacacggtccagactcctacgggaggcagcagtagggaatcttccgcaatgggcgaaagcctgacggagcaacgccgcgtgagtgaagaaggtcttcggatcgtaaaactctgttattagggaagaacaaatgtgtaagtaactatgcacgtcttgacggtacctaatcagaaagccacggctaactacgtgccagcagccg…	Bacteria;	k__Bacteria;p__Firmicutes;c__Bacilli;o__Bacillales;f__Staphylococcaceae;g__Staphylococcus;	Unclassified;	Bacteria;Firmicutes;Bacilli;Bacillales;Staphylococcaceae;Staphylococcus;	Bacteria;Firmicutes;Bacilli;Bacillales;Staphylococcaceae;Staphylococcus;
AM059_003	tataagactgggataacttcgggaaaccggagctaataccggataacatgttgaaccgcatggttcaacagtgaaagacggtcttgctgtcacttatagatggatccgcgccgcattagctagttggtaaggtaacggcttaccaaggcaacgatgcgtagccgacctgagagggtgatcggccacactggaactgagacacggtccagactcctacgggaggcagcagtagggaatcttccgcaatgggcgaaagcctgacggagcaacgccgcgtgagtgaagaaggtcttcggatcgtaaaactctgttattagggaagaacaaatgtgtaagtaactatgcacgtcttgacggtacctaatcagaaagccacggctaactacgtgccagcagccg…	Bacteria;	k__Bacteria;p__Firmicutes;c__Bacilli;o__Bacillales;f__Staphylococcaceae;g__Staphylococcus;	Bacteria;Firmicutes;Bacilli;Bacillales;Staphylococcaceae;Staphylococcus;	Bacteria;Firmicutes;Bacilli;Bacillales;Staphylococcaceae;Staphylococcus;	Bacteria;Firmicutes;Bacilli;Bacillales;Staphylococcaceae;Staphylococcus;
AM059_004	tataagactgggataacttcgggaaaccggagctaataccggataacatgttgaaccgcatggttcaacagtgaaagacggtcttgctgtcacttatagatggatccgcgccgcattagctagttggtaaggtaacggcttaccaaggcaacgatgcgtagccgacctgagagggtgatcggccacactggaactgagacacggtccagactcctacgggaggcagcagtagggaatcttccgcaatgggcgaaagcctgacggagcaacgccgcgtgagtgaagaaggtcttcggatcgtaaaactctgttattagggaagaacaaatgtgtaagtaactatgcacgtcttgacggtacctaatcagaaagccacggctaactacgtgccagcagccg…	Bacteria;	k__Bacteria;p__Firmicutes;c__Bacilli;o__Bacillales;f__Staphylococcaceae;g__Staphylococcus;	Unclassified;	Bacteria;Firmicutes;Bacilli;Bacillales;Staphylococcaceae;Staphylococcus;	Bacteria;Firmicutes;Bacilli;Bacillales;Staphylococcaceae;Staphylococcus;
AM059_005	tataagactgggataacttcgggaaaccggagctaataccggataatatattgaaccgcatggttcaatagtgaaagacggttttgctgtcacttatagatggatccgcgccgcattagctagttggtaaggtaacggcttaccaaggcaacgatgcgtagccgacctgagagggtgatcggccacactggaactgagacacggtccagactcctacgggaggcagcagtagggaatcttccgcaatgggcgaaagcctgacggagcaacgccgcgtgagtgatgaaggtcttcggatcgtaaaactctgttattagggaagaacaaatgtgtaagtaactatgcacgtcttgacggtacctaatcagaaagccacggctaactacgtgccagcagccg…	Bacteria;	k__Bacteria;p__Firmicutes;c__Bacilli;o__Bacillales;f__Staphylococcaceae;g__Staphylococcus;s__epidermidis;	Unclassified;	Bacteria;Firmicutes;Bacilli;Bacillales;Staphylococcaceae;Staphylococcus;	Bacteria;Firmicutes;Bacilli;Bacillales;Staphylococcaceae;Staphylococcus;
AM059_006	tgtaagactgggataacttcgggaaaccggagctaataccggataatcctttccttcacatgaggggaagctgaaagacggcttctagctgtcacttacagatgggcccgcggcgcattagctagttggtgaggtaacggctcaccaaggccacgatgcgtagccgacctgagagggtgatcggccacactgggactgagacacggcccagactcctacgggaggcagcagtagggaatcttccgcaatggacgaaagtctgacggagcaacgccgcgtgagtgatgaaggttttcggatcgtaaaactctgttgttagggaagaacaagtatcggagtaactgccggtaccttgacggtacctaaccagaaagccacggctaactacgtgccagcagc…	Bacteria;Firmicutes;Bacilli;Bacillales;Bacillaceae;Bacillus;	k__Bacteria;p__Firmicutes;c__Bacilli;o__Bacillales;f__Bacillaceae;	Unclassified;	Bacteria;Firmicutes;Bacilli;Bacillales;Bacillaceae 1;Bacillus;	Bacteria;Firmicutes;Bacilli;Bacillales;Bacillaceae;Bacillus;
AM059_009	cttaactctgggataagcctgggaaactgggtctaataccggataggagcgtccaccgcatggtgggtgttggaaagatttatcggttttggatggactcgcggcctatcagcttgttggtgaggtaatggctcaccaaggcgacgacgggtagccggcctgagagggtgaccggccacattgggactgagacacggcccaaactcctacgggaggcagcagtggggaatattgcacaatgggcgaaagcctgatgcagcgacgccgcgtgagggatgacggccttcgggttgtaaacctctttcagtagggaagaagcgaaagtgacggtacctgcagaagaagcaccggctaactacgtgccagcagccgcggtaatacgtagggtgcgagcgttat…	Bacteria;Actinobacteria;Micrococcales;Micrococcaceae;Micrococcus;	k__Bacteria;p__Actinobacteria;c__Actinobacteria;o__Actinomycetales;f__Micrococcaceae;g__Micrococcus;s__luteus;	Unclassified;	Bacteria;"Actinobacteria";Actinobacteria;Actinobacteridae;Actinomycetales;Micrococcineae;Micrococcaceae;Micrococcus;	Bacteria;Actinobacteria;Actinobacteria;Micrococcales;Micrococcaceae;Micrococcus;
AM059_010	cttgactctgggataagcccgggaaactgggtctaatactggatgctacatgtcaccgcatggtggtgtgtggaaagggtttactggtcttggatgggctcacggcctatcagcttgttggtgaggtaatggctcaccaaggcgacgacgggtagccggcctgagagggtgaccggccacactgggactgagacacggcccagactcctacgggaggcagcagtggggaatattgcacaatgggcgaaagcctgatgcagcgacgccgcgtgagggatgacggccttcgggttgtaaacctctttcagcagggaagaagccacaagtgacggtacctgcagaagaagcgccggctaactacgtgccagcagccgcggtaatacgtagggcgcaagcgtt…	Bacteria;	k__Bacteria;p__Actinobacteria;c__Actinobacteria;o__Actinomycetales;f__Micrococcaceae;g__Kocuria;s__palustris;	Unclassified;	Bacteria;"Actinobacteria";Actinobacteria;Actinobacteridae;Actinomycetales;Micrococcineae;Micrococcaceae;Kocuria;	Bacteria;Actinobacteria;Actinobacteria;Micrococcales;Micrococcaceae;Kocuria;
AM060_001	ctatagtttgggataactccgggaaaccggggctaataccgaataatctcttttgcttcatggtgaaagactgaaagacggtttcggctgtcgctataggatgggcccgcggcgcattagctagttggtgaggtaacggctcaccaaggcgacgatgcgtagccgacctgagagggtgatcggccacactgggactgagacacggcccagactcctacgggaggcagcagtagggaatcttccacaatgggcgaaagcctgatggagcaacgccgcgtgagtgaagaaggttttcggatcgtaaaactctgttgtaagggaagaacaagtacagtagtaactggctgtaccttgacggtaccttattagaaagccacggctaactacgtgccagcagcc…	Bacteria;Firmicutes;Bacilli;Bacillales;Bacillaceae;	k__Bacteria;p__Firmicutes;c__Bacilli;o__Bacillales;f__Planococcaceae;g__Lysinibacillus;s__boronitolerans;	Unclassified;	Bacteria;Firmicutes;Bacilli;Bacillales;Planococcaceae;Lysinibacillus;	Bacteria;Firmicutes;Bacilli;Bacillales;Planococcaceae;Lysinibacillus;
AM060_002	cttaactctgggataagcctgggaaactgggtctaataccggataggagcgtcnaccgcatggtgggtgttggaaagatttatcggttttggatggactcgcggcctatcagcttgttggtgaggtaatggctcaccaaggcgacgacgggtagccggcctgagagggtgaccggccacactgggactgagacacggcccagactcctacgggaggcagcagtggggaatattgcacaatgggcgaaagcctgatgcagcgacgccgcgtgagggatgacggccttcgggttgtaaacctctttcagtagggaagaagcgaaagtgacggtacctgcagaagaagcaccggctaactacgtgccagcagccgcggtaatacgtagggtgcgagcgttat…	Unclassified;	k__Bacteria;p__Actinobacteria;c__Actinobacteria;o__Actinomycetales;f__Micrococcaceae;g__Micrococcus;s__luteus;	Unclassified;	Bacteria;"Actinobacteria";Actinobacteria;Actinobacteridae;Actinomycetales;Micrococcineae;Micrococcaceae;Micrococcus;	Bacteria;Actinobacteria;Actinobacteria;Micrococcales;Micrococcaceae;Micrococcus;
AM060_003	tataagactgggataacttcgggaaaccggagctaataccggataacatgttgaaccgcatggttcaacagtgaaagacggtcttgctgtcacttatagatggatccgcgccgcattagctagttggtaaggtaacggcttaccaaggcaacgatgcgtagccgacctgagagggtgatcggccacactggaactgagacacggtccagactcctacgggaggcagcagtagggaatcttccgcaatgggcgaaagcctgacggagcaacgccgcgtgagtgaagaaggtcttcggatcgtaaaactctgttattagggaagaacaaatgtgtaagtaactatgcacgtcttgacggtacctaatcagaaagccacggctaactacgtgccagcagccg…	Bacteria;	k__Bacteria;p__Firmicutes;c__Bacilli;o__Bacillales;f__Staphylococcaceae;g__Staphylococcus;	Unclassified;	Bacteria;Firmicutes;Bacilli;Bacillales;Staphylococcaceae;Staphylococcus;	Bacteria;Firmicutes;Bacilli;Bacillales;Staphylococcaceae;Staphylococcus;
AM060_004	tataagactgggataacttcgggaaaccggagctaataccggataatatttcgaaccgcatggttcgatagtgaaagatggctttgctatcacttatagatggacctgcgccgtattagctagttggtaaggtaacggcttaccaaggcaacgatacgtagccgacctgagagggtgatcggccacactggaactgagacacggtccagactcctacgggaggcagcagtagggaatcttccgcaatgggcgaaagcctgacggagcaacgccgcgtgagtgatgaaggtcttcggatcgtaaaactctgttattagggaagaacaaacgtgtaagtaactgtgcacgtcttgacggtacctaatcagaaagccacggctaactacgtgccagcagccg…	Bacteria;	k__Bacteria;p__Firmicutes;c__Bacilli;o__Bacillales;f__Staphylococcaceae;g__Staphylococcus;	Unclassified;	Bacteria;Firmicutes;Bacilli;Bacillales;Staphylococcaceae;Staphylococcus;	Bacteria;Firmicutes;Bacilli;Bacillales;Staphylococcaceae;Staphylococcus;
AM060_005	tataagactgggataacttcgggaaaccggagctaataccggataatatttcgaaccgcatggttcgatagtgaaagatggctttgctatcacttatagatggacctgcgccgtattagctagttggtaaggtaacggcttaccaaggcaacgatacgtagccgacctgagagggtgatcggccacactggaactgagacacggtccagactcctacgggaggcagcagtagggaatcttccgcaatgggcgaaagcctgacggagcaacgccgcgtgagtgatgaaggtcttcggatcgtaaaactctgttattagggaagaacaaacgtgtaagtaactgtgcacgtcttgacggtacctaatcagaaagccacggctaactacgtgccagcagccg…	Bacteria;	k__Bacteria;p__Firmicutes;c__Bacilli;o__Bacillales;f__Staphylococcaceae;g__Staphylococcus;	Unclassified;	Bacteria;Firmicutes;Bacilli;Bacillales;Staphylococcaceae;Staphylococcus;	Bacteria;Firmicutes;Bacilli;Bacillales;Staphylococcaceae;Staphylococcus;
AM060_006	cttaactctgggataagcctgggaaactgggtctaataccggataggagcgtccaccgcatggtgggtgttggaaagatttatcggttttggatggactcgcggcctatcagcttgttggtgaggtaatggctcaccaaggcgacgacgggtagccggcctgagagggtgaccggccacactgggactgagacacggcccagactcctacgggaggcagcagtggggaatattgcacaatgggcgaaagcctgatgcagcgacgccgcgtgagggatgacggccttcgggttgtaaacctctttcagtagggaagaagcgaaagtgacggtacctgcagaagaagcaccggctaactacgtgccagcagccgcggtaatacgtagggtgcgagcgttat…	Bacteria;Actinobacteria;Micrococcales;Micrococcaceae;	k__Bacteria;p__Actinobacteria;c__Actinobacteria;o__Actinomycetales;f__Micrococcaceae;g__Micrococcus;s__luteus;	Bacteria;Actinobacteria;Actinobacteria;Micrococcales;Micrococcaceae;Micrococcus;	Bacteria;"Actinobacteria";Actinobacteria;Actinobacteridae;Actinomycetales;Micrococcineae;Micrococcaceae;Micrococcus;	Bacteria;Actinobacteria;Actinobacteria;Micrococcales;Micrococcaceae;Micrococcus;
AM060_007	cttaactcggggataagcctgggaaactgggtctaataccggataggagcgcctaccgcatggtgggtgttggaaagatttatcggttttggatggactcgcggcctatcagcttgttggtgaggtaatggctcaccaaggcgacgacgggtagccggcctgagagggtgaccggccacactgggactgagacacggcccagactcctacgggaggcagcagtggggaatattgcacaatgggcgcaagcctgatgcagcgacgccgcgtgagggatgacggccttcgggttgtaaacctctttcagtagggaagaagcgaaagtgacggtacctgcagaagaagcaccggctaactacgtgccagcagccgcggtaatacgtagggtgcgagcgttat…	Bacteria;Actinobacteria;Micrococcales;Micrococcaceae;Micrococcus;	k__Bacteria;p__Actinobacteria;c__Actinobacteria;o__Actinomycetales;f__Micrococcaceae;g__Micrococcus;s__luteus;	Unclassified;	Bacteria;"Actinobacteria";Actinobacteria;Actinobacteridae;Actinomycetales;Micrococcineae;Micrococcaceae;Micrococcus;	Bacteria;Actinobacteria;Actinobacteria;Micrococcales;Micrococcaceae;Micrococcus;
AM060_008	cttaactctgggataagcctgggaaactgggtctaataccggataggagcgtccaccgcatggtgggtgttggaaagatttatcggttttggatggactcgcggcctatcagcttgttggtgaggtaatggctcaccaaggcgacgacgggtagccggcctgagagggtgaccggccacactgggactgagacacggcccagactcctacgggaggcagcagtggggaatattgcacaatgggcgcaagcctgatgcagcgacgccgcgtgagggatgacggccttcgggttgtaaacctctttcagtagggaagaagcgaaagtgacggtacctgcagaagaagcaccggctaactacgtgccagcagccgcggtaatacgtagggtgcgagcgttat…	Bacteria;Actinobacteria;Micrococcales;Micrococcaceae;	k__Bacteria;p__Actinobacteria;c__Actinobacteria;o__Actinomycetales;f__Micrococcaceae;g__Micrococcus;s__luteus;	Unclassified;	Bacteria;"Actinobacteria";Actinobacteria;Actinobacteridae;Actinomycetales;Micrococcineae;Micrococcaceae;Micrococcus;	Bacteria;Actinobacteria;Actinobacteria;Micrococcales;Micrococcaceae;Micrococcus;
AM060_009	cttaactctgggataagcctgggaaactgggtctaataccggataggagcgtccaccgcatggtgggtgttggaaagatttatcggttttggatggactcgcggcctatcagcttgttggtgaggtaatggctcaccaaggcgacgacgggtagccggcctgagagggtgaccggccacactgggactgagacacggcccagactcctacgggaggcagcagtggggaatattgcacaatgggcgcaagcctgatgcagcgacgccgcgtgagggatgacggccttcgggttgtaaacctctttcagtagggaagaagcgaaagtgacggtacctgcagaagaagcaccggctaactacgtgccagcagccgcggtaatacgtagggtgcgagcgttat…	Bacteria;Actinobacteria;Micrococcales;Micrococcaceae;Micrococcus;	k__Bacteria;p__Actinobacteria;c__Actinobacteria;o__Actinomycetales;f__Micrococcaceae;g__Micrococcus;s__luteus;	Unclassified;	Bacteria;"Actinobacteria";Actinobacteria;Actinobacteridae;Actinomycetales;Micrococcineae;Micrococcaceae;Micrococcus;	Bacteria;Actinobacteria;Actinobacteria;Micrococcales;Micrococcaceae;Micrococcus;
AM060_101	tataagactgggataacttcgggaaaccggagctaataccggataatatttcgaaccgcatggttcgatagtgaaagatggctttgctatcacttatagatggacctgcgccgtattagctagttggtaaggtaacggcttaccaaggcaacgatacgtagccgacctgagagggtgatcggccacactggaactgagacacggtccagactcctacgggaggcagcagtagggaatcttccgcaatgggcgaaagcctgacggagcaacgccgcgtgagtgatgaaggtcttcggatcgtaaaactctgttattagggaagaacaaacgtgtaagtaactgtgcacgtcttgacggtacctaatcagaaagccacggctaactacgtgccagcagccg…	Bacteria;	k__Bacteria;p__Firmicutes;c__Bacilli;o__Bacillales;f__Staphylococcaceae;g__Staphylococcus;	Unclassified;	Bacteria;Firmicutes;Bacilli;Bacillales;Staphylococcaceae;Staphylococcus;	Bacteria;Firmicutes;Bacilli;Bacillales;Staphylococcaceae;Staphylococcus;
AM060_301	tataagactgggataacttcgggaaaccggagctaataccggataatatattgaaccgcatggttcaatagtgaaagacggttttgctgtcacttatagatggatccgcgccgcattagctagttggtaaggtaacggcttaccaaggcaacgatgcgtagccgacctgagagggtgatcggccacactggaactgagacacggtccagactcctacgggaggcagcagtagggaatcttccgcaatgggcgaaagcctgacggagcaacgccgcgtgagtgatgaaggtcttcggatcgtaaaactctgttattagggaagaacaaatgtgtaagtaactatgcacgtcttgacggtacctaatcagaaagccacggctaactacgtgccagcagccg…	Bacteria;	k__Bacteria;p__Firmicutes;c__Bacilli;o__Bacillales;f__Staphylococcaceae;g__Staphylococcus;s__epidermidis;	Unclassified;	Bacteria;Firmicutes;Bacilli;Bacillales;Staphylococcaceae;Staphylococcus;	Bacteria;Firmicutes;Bacilli;Bacillales;Staphylococcaceae;Staphylococcus;
AM060_302	tataagactgggataacttcgggaaaccggagctaataccggataatatttcgaaccgcatggttcgatagtgaaagatggctttgctatcacttatagatggacctgcgccgtattagctagttggtaaggtaacggcttaccaaggcaacgatacgtagccgacctgagagggtgatcggccacactggaactgagacacggtccagactcctacgggaggcagcagtagggaatcttccgcaatgggcgaaagcctgacggagcaacgccgcgtgagtgatgaaggtcttcggatcgtaaaactctgttattagggaagaacaaacgtgtaagtaactgtgcacgtcttgacggtacctaatcagaaagccacggctaactacgtgccagcagccg…	Bacteria;	k__Bacteria;p__Firmicutes;c__Bacilli;o__Bacillales;f__Staphylococcaceae;g__Staphylococcus;	Unclassified;	Bacteria;Firmicutes;Bacilli;Bacillales;Staphylococcaceae;Staphylococcus;	Bacteria;Firmicutes;Bacilli;Bacillales;Staphylococcaceae;Staphylococcus;
AM061_001	tataagactgggataacttcgggaaaccggagctaataccggataatatttcgaaccgcatggttcgatagtgaaagatggctttgctatcacttatagatggacctgcgccgtattagctagttggtaaggtaacggcttaccaaggcaacgatacgtagccgacctgagagggtgatcggccacactggaactgagacacggtccagactcctacgggaggcagcagtagggaatcttccgcaatgggcgaaagcctgacggagcaacgccgcgtgagtgatgaaggtcttcggatcgtaaaactctgttattagggaagaacaaacgtgtaagtaactgtgcacgtcttgacggtacctaatcagaaagccacggctaactacgtgccagcagccg…	Bacteria;	k__Bacteria;p__Firmicutes;c__Bacilli;o__Bacillales;f__Staphylococcaceae;g__Staphylococcus;	Unclassified;	Bacteria;Firmicutes;Bacilli;Bacillales;Staphylococcaceae;Staphylococcus;	Bacteria;Firmicutes;Bacilli;Bacillales;Staphylococcaceae;Staphylococcus;
AM061_002	ctgaggtgggggacaaccccgggaaactggggctaataccgcatatgggctgaggcccaaagccgagaggcgcctttggagcggcctgcgtccgattaggtagttggtggggtaaaggcctaccaagcctgcgatcggtagctggtctgagaggacgaccagccacactgggactgagacacggcccagactcctacgggaggcagcagtggggaatattggacaatgggcgaaagcctgatccagcaatgccgcgtgggtgaagaaggtcttcggatcgtaaagccctttcgacggggacgatgatgacggtacccgtagaagaagccccggctaacttcgtgccagcagccgcggtaatacgaagggggctagcgttgctcggaattactgggcgta…	Bacteria;Proteobacteria;Alphaproteobacteria;Rhodospirillales;Acetobacteraceae;Roseomonas;	k__Bacteria;p__Proteobacteria;c__Alphaproteobacteria;o__Rhodospirillales;f__Acetobacteraceae;g__Roseomonas;s__mucosa;	Bacteria;Proteobacteria;Alphaproteobacteria;Rhodospirillales;Acetobacteraceae;Roseomonas;	Bacteria;"Proteobacteria";Alphaproteobacteria;Rhodospirillales;Acetobacteraceae;Roseomonas;	Bacteria;Proteobacteria;Alphaproteobacteria;Acetobacterales;Acetobacteraceae;Roseomonas;
AM061_003	tataagactgggataacttcgggaaaccggagctaataccggataatatattgaaccgcatggttcaatagtgaaagacggttttgctgtcacttatagatggatccgcgccgcattagctagttggtaaggtaacggcttaccaaggcaacgatgcgtagccgacctgagagggtgatcggccacactggaactgagacacggtccagactcctacgggaggcagcagtagggaatcttccgcaatgggcgaaagcctgacggagcaacgccgcgtgagtgatgaaggtcttcggatcgtaaaactctgttattagggaagaacaaatgtgtaagtaactatgcacgtcttgacggtacctaatcagaaagccacggctaactacgtgccagcagccg…	Bacteria;Firmicutes;Bacilli;Bacillales;Staphylococcaceae;Staphylococcus;	k__Bacteria;p__Firmicutes;c__Bacilli;o__Bacillales;f__Staphylococcaceae;g__Staphylococcus;s__epidermidis;	Unclassified;	Bacteria;Firmicutes;Bacilli;Bacillales;Staphylococcaceae;Staphylococcus;	Bacteria;Firmicutes;Bacilli;Bacillales;Staphylococcaceae;Staphylococcus;
AM061_004	ctgaggtgggggacaaccccgggaaactggggctaataccgcatatgggctgaggcccaaagccgagaggcgcctttggagcggcctgcgtccgattaggtagttggtggggtaaaggcctaccaagcctgcgatcggtagctggtctgagaggacgaccagccacactgggactgagacacggcccagactcctacgggaggcagcagtggggaatattggacaatgggcgaaagcctgatccagcaatgccgcgtgggtgaagaaggtcttcggatcgtaaagccctttcgacggggacgatgatgacggtacccgtagaagaagccccggctaacttcgtgccagcagccgcggtaatacgaagggggctagcgttgctcggaattactgggcgta…	Bacteria;Proteobacteria;Alphaproteobacteria;Rhodospirillales;Acetobacteraceae;Roseomonas;	k__Bacteria;p__Proteobacteria;c__Alphaproteobacteria;o__Rhodospirillales;f__Acetobacteraceae;g__Roseomonas;s__mucosa;	Bacteria;Proteobacteria;Alphaproteobacteria;Rhodospirillales;Acetobacteraceae;Roseomonas;	Bacteria;"Proteobacteria";Alphaproteobacteria;Rhodospirillales;Acetobacteraceae;Roseomonas;	Bacteria;Proteobacteria;Alphaproteobacteria;Acetobacterales;Acetobacteraceae;Roseomonas;
AM062_002	tataagactgggataacttcgggaaaccggagctaataccggataatatattgaaccgcatggttcaatagtgaaagacggttttgctgtcacttatagatggatccgcgccgcattagctagttggtaaggtaacggcttaccaaggcaacgatgcgtagccgacctgagagggtgatcggccacactggaactgagacacggtccagactcctacgggaggcagcagtagggaatcttccgcaatgggcgaaagcctgacggagcaacgccgcgtgagtgatgaaggtcttcggatcgtaaaactctgttattagggaagaacaaatgtgtaagtaactatgcacgtcttgacggtacctaatcagaaagccacggctaactacgtgccagcagccg…	Bacteria;	k__Bacteria;p__Firmicutes;c__Bacilli;o__Bacillales;f__Staphylococcaceae;g__Staphylococcus;s__epidermidis;	Unclassified;	Bacteria;Firmicutes;Bacilli;Bacillales;Staphylococcaceae;Staphylococcus;	Bacteria;Firmicutes;Bacilli;Bacillales;Staphylococcaceae;Staphylococcus;
AM062_003	tataagactgggataacttcgggaaaccggagctaataccggataacatgttgaaccgcatggttcaacagtgaaagacggtcttgctgtcacttatagatggatccgcgccgcattagctagttggtaaggtaacggcttaccaaggcaacgatgcgtagccgacctgagagggtgatcggccacactggaactgagacacggtccagactcctacgggaggcagcagtagggaatcttccgcaatgggcgaaagcctgacggagcaacgccgcgtgagtgaagaaggtcttcggatcgtaaaactctgttattagggaagaacaaatgtgtaagtaactatgcacgtcttgacggtacctaatcagaaagccacggctaactacgtgccagcagccg…	Bacteria;	k__Bacteria;p__Firmicutes;c__Bacilli;o__Bacillales;f__Staphylococcaceae;g__Staphylococcus;	Unclassified;	Bacteria;Firmicutes;Bacilli;Bacillales;Staphylococcaceae;Staphylococcus;	Bacteria;Firmicutes;Bacilli;Bacillales;Staphylococcaceae;Staphylococcus;
AM062_004	tataagactgggataacttcgggaaaccggagctaataccggataatatattgaaccgcatggttcaatagtgaaagacggttttgctgtcacttatagatggatccgcgccgcattagctagttggtaaggtaacggcttaccaaggcaacgatgcgtagccgacctgagagggtgatcggccacactggaactgagacacggtccagactcctacgggaggcagcagtagggaatcttccgcaatgggcgaaagcctgacggagcaacgccgcgtgagtgatgaaggtcttcggatcgtaaaactctgttattagggaagaacaaatgtgtaagtaactatgcacgtcttgacggtacctaatcagaaagccacggctaactacgtgccagcagccg…	Bacteria;Firmicutes;Bacilli;Bacillales;Staphylococcaceae;Staphylococcus;	k__Bacteria;p__Firmicutes;c__Bacilli;o__Bacillales;f__Staphylococcaceae;g__Staphylococcus;s__epidermidis;	Unclassified;	Bacteria;Firmicutes;Bacilli;Bacillales;Staphylococcaceae;Staphylococcus;	Bacteria;Firmicutes;Bacilli;Bacillales;Staphylococcaceae;Staphylococcus;
AM062_005	tataagactgggataacttcgggaaaccggagctaataccggataacatgttgaaccgcatggttcaacagtgaaagacggtcttgctgtcacttatagatggatccgcgccgcattagctagttggtaaggtaacggcttaccaaggcaacgatgcgtagccgacctgagagggtgatcggccacactggaactgagacacggtccagactcctacgggaggcagcagtagggaatcttccgcaatgggcgaaagcctgacggagcaacgccgcgtgagtgaagaaggtcttcggatcgtaaaactctgttattagggaagaacaaatgtgtaagtaactatgcacgtcttgacggtacctaatcagaaagccacggctaactacgtgccagcagccg…	Bacteria;	k__Bacteria;p__Firmicutes;c__Bacilli;o__Bacillales;f__Staphylococcaceae;g__Staphylococcus;	Unclassified;	Bacteria;Firmicutes;Bacilli;Bacillales;Staphylococcaceae;Staphylococcus;	Bacteria;Firmicutes;Bacilli;Bacillales;Staphylococcaceae;Staphylococcus;
AM062_006	tataagactgggataacttcgggaaaccggagctaataccggataatatattgaaccgcatggttcaatagtgaaagacggttttgctgtcacttatagatggatccgcgccgcattagctagttggtaaggtaacggcttaccaaggcaacgatgcgtagccaacctgagagggtgatcggccacactggaactgaaacacggtccaaactcctacgggaggcagcagtagggaatcttccgcaatgggcgaaagcctgacggagcaacgccgcgtgagtgatgaaggtcttcggatcgtaaaactctgttattagggaaaaacaaatgtgtaagtaactatgcacgtcttgacggtacctaatcaaaaagccacggctaactacgtgccagcagccg…	Bacteria;	k__Bacteria;p__Firmicutes;c__Bacilli;o__Bacillales;f__Staphylococcaceae;g__Staphylococcus;s__epidermidis;	Unclassified;	Bacteria;Firmicutes;Bacilli;Bacillales;Staphylococcaceae;Staphylococcus;	Bacteria;Firmicutes;Bacilli;Bacillales;Staphylococcaceae;Staphylococcus;
AM063_001	tataagactgggataacttcgggaaaccggagctaataccggataacatttggaaccgcatggttctaaagtgaaagatggttttgctatcacttatagatggacccgcgccgtattagctagttggtaaggtaacggcttaccaaggcgacgatacgtagccgacctgagagggtgatcggccacactggaactgagacacggtccagactcctacgggaggcagcagtagggaatcttccgcaatgggcgaaagcctgacggagcaacgccgcgtgagtgatgaagggtttcggctcgtaaaactctgttattagggaagaacaaacgtgtaagtaactgtgcacgtcttgacggtacctaatcagaaagccacggctaactacgtgccagcagccg…	Bacteria;Firmicutes;Bacilli;Bacillales;Staphylococcaceae;Staphylococcus;	k__Bacteria;p__Firmicutes;c__Bacilli;o__Bacillales;f__Staphylococcaceae;g__Staphylococcus;	Bacteria;Firmicutes;Bacilli;Bacillales;Staphylococcaceae;Staphylococcus;	Bacteria;Firmicutes;Bacilli;Bacillales;Staphylococcaceae;Staphylococcus;	Bacteria;Firmicutes;Bacilli;Bacillales;Staphylococcaceae;Staphylococcus;
AM063_004	tataagactgggataacttcgggaaaccggagctaataccggataacatttggaaccgcatggttctaaagtgaaagatggttttgctatcacttatagatggacccgcgccgtattagctagttggtaaggtaacggcttaccaaggcgacgatacgtagccgacctgagagggtgatcggccacactggaactgagacacggtccagactcctacgggaggcagcagtagggaatcttccgcaatgggcgaaagcctgacggagcaacgccgcgtgagtgatgaagggtttcggctcgtaaaactctgttattagggaagaacaaacgtgtaagtaactgtgcacgtcttgacggtacctaatcagaaagccacggctaactacgtgccagcagccg…	Bacteria;Firmicutes;Bacilli;Bacillales;Staphylococcaceae;Staphylococcus;	k__Bacteria;p__Firmicutes;c__Bacilli;o__Bacillales;f__Staphylococcaceae;g__Staphylococcus;	Bacteria;Firmicutes;Bacilli;Bacillales;Staphylococcaceae;Staphylococcus;	Bacteria;Firmicutes;Bacilli;Bacillales;Staphylococcaceae;Staphylococcus;	Bacteria;Firmicutes;Bacilli;Bacillales;Staphylococcaceae;Staphylococcus;
AM063_005	tataagactgggataacttcgggaaaccggagctaataccggataacatttggaaccgcatggttctaaagtgaaagatggttttgctatcacttatagatggacccgcgccgtattagctagttggtaaggtaacggcttaccaaggcgacgatacgtagccgacctgagagggtgatcggccacactggaactgagacacggtccagactcctacgggaggcagcagtagggaatcttccgcaatgggcgaaagcctgacggagcaacgccgcgtgagtgatgaagggtttcggctcgtaaaactctgttattagggaagaacaaacgtgtaagtaactgtgcacgtcttgacggtacctaatcagaaagccacggctaactacgtgccagcagccg…	Bacteria;Firmicutes;Bacilli;Bacillales;Staphylococcaceae;Staphylococcus;	k__Bacteria;p__Firmicutes;c__Bacilli;o__Bacillales;f__Staphylococcaceae;g__Staphylococcus;	Bacteria;Firmicutes;Bacilli;Bacillales;Staphylococcaceae;Staphylococcus;	Bacteria;Firmicutes;Bacilli;Bacillales;Staphylococcaceae;Staphylococcus;	Bacteria;Firmicutes;Bacilli;Bacillales;Staphylococcaceae;Staphylococcus;
AM063_101	tataagactgggataacttcgggaaaccggagctaataccggataacatttggaaccgcatggttctaaagtgaaagatggttttgctatcacttatagatggacccgcgccgtattagctagttggtaaggtaacggcttaccaaggcgacgatacgtagccgacctgagagggtgatcggccacactggaactgagacacggtccagactcctacgggaggcagcagtagggaatcttccgcaatgggcgaaagcctgacggagcaacgccgcgtgagtgatgaagggtttcggctcgtaaaactctgttattagggaagaacaaacgtgtaagtaactgtgcacgtcttgacggtacctaatcagaaagccacggctaactacgtgccagcagccg…	Bacteria;Firmicutes;Bacilli;Bacillales;Staphylococcaceae;Staphylococcus;	k__Bacteria;p__Firmicutes;c__Bacilli;o__Bacillales;f__Staphylococcaceae;g__Staphylococcus;	Bacteria;Firmicutes;Bacilli;Bacillales;Staphylococcaceae;Staphylococcus;	Bacteria;Firmicutes;Bacilli;Bacillales;Staphylococcaceae;Staphylococcus;	Bacteria;Firmicutes;Bacilli;Bacillales;Staphylococcaceae;Staphylococcus;
AM063_102	tatggnactgggataacttcgggaaaccggagctaataccggataacatttggaaccgcatggttctaaagtgaaagatggttttgctatcacttatagatggacccgcgccgtattagctagttggtaaggtaacggcttaccaaggcgacgatacgtagccgacctgagagggtgatcggccacactggaactgagacacggtccagactcctacgggaggcagcagtagggaatcttccgcaatgggcgaaagcctgacggagcaacgccgcgtgagtgatgaagggtttcggctcgtaaaactctgttattagggaagaacaaacgtgtaagtaactgtgcacgtcttgacggtacctaatcagaaagccacggctaactacgtgccagcagccg…	Bacteria;Firmicutes;Bacilli;Bacillales;Staphylococcaceae;Staphylococcus;	k__Bacteria;p__Firmicutes;c__Bacilli;o__Bacillales;f__Staphylococcaceae;g__Staphylococcus;	Bacteria;Firmicutes;Bacilli;Bacillales;Staphylococcaceae;Staphylococcus;	Bacteria;Firmicutes;Bacilli;Bacillales;Staphylococcaceae;Staphylococcus;	Bacteria;Firmicutes;Bacilli;Bacillales;Staphylococcaceae;Staphylococcus;
AM063_105	tataagactgggataacttcgggaaaccggagctaataccggataatatttcgaaccgcatggttcgatagtgaaagatggctttgctatcacttatagatggacctgcgccgtattagctagttggtaaggtaacggcttaccaaggcaacgatacgtagccgacctgagagggtgatcggccacactggaactgagacacggtccagactcctacgggaggcagcagtagggaatcttccgcaatgggcgaaagcctgacggagcaacgccgcgtgagtgatgaaggtcttcggatcgtaaaactctgttattagggaagaacaaacgtgtaagtaactgtgcacgtcttgacggtacctaatcagaaagccacggctaactacgtgccagcagccg…	Bacteria;	k__Bacteria;p__Firmicutes;c__Bacilli;o__Bacillales;f__Staphylococcaceae;g__Staphylococcus;	Unclassified;	Bacteria;Firmicutes;Bacilli;Bacillales;Staphylococcaceae;Staphylococcus;	Bacteria;Firmicutes;Bacilli;Bacillales;Staphylococcaceae;Staphylococcus;
AM063_106	tataagactgggataacttcgggaaaccggagctaataccggataacatttggaaccgcatggttctaaagtgaaagatggttttgctatcacttatagatggacccgcgccgtattagctagttggtaaggtaacggcttaccaaggcgacgatacgtagccgacctgagagggtgatcggccacactggaactgagacacggtccagactcctacgggaggcagcagtagggaatcttccgcaatgggcgaaagcctgacggagcaacgccgcgtgagtgatgaagggtttcggctcgtaaaactctgttattagggaagaacaaacgtgtaagtaactgtgcacgtcttgacggtacctaatcagaaagccacggctaactacgtgccagcagccg…	Bacteria;Firmicutes;Bacilli;Bacillales;Staphylococcaceae;Staphylococcus;	k__Bacteria;p__Firmicutes;c__Bacilli;o__Bacillales;f__Staphylococcaceae;g__Staphylococcus;	Bacteria;Firmicutes;Bacilli;Bacillales;Staphylococcaceae;Staphylococcus;	Bacteria;Firmicutes;Bacilli;Bacillales;Staphylococcaceae;Staphylococcus;	Bacteria;Firmicutes;Bacilli;Bacillales;Staphylococcaceae;Staphylococcus;
AM063_201	cttgactttgggataacttcaggaaactggggctaataccggataggagctcctgctgcatggtgggggttggaaagtttcggcggttggggatggactcgcggcttatcagcttgttggtggggtagtggcttaccaaggctttgacgggtagccggcctgagagggtgaccggccacattgggactgagatacggcccagactcctacgggaggcagcagtggggaatattgcacaatgggtggaagcctgatgcagcaacgccgtgtgcgggatgacggccttcgggttgtaaaccgctttcgctcatgacgaagctttgtgtgacggtagtgggtaaagaagcaccggctaactacgtgccagcagccgcggtgatacgtagggtgcgagcgttg…	Unclassified;	k__Bacteria;p__Actinobacteria;c__Actinobacteria;o__Actinomycetales;f__Propionibacteriaceae;g__Propionibacterium;s__acnes;	Unclassified;	Bacteria;"Actinobacteria";Actinobacteria;Actinobacteridae;Actinomycetales;Propionibacterineae;Propionibacteriaceae;Propionibacterium;	Bacteria;Actinobacteria;Actinobacteria;Propionibacteriales;Propionibacteriaceae;Cutibacterium;
AM063_202	cttgactttgggataacttcaggaaactggggctaataccggataggagctcctgctgcatggtgggggttggaaagtttcggcggttggggatggactcgcggcttatcagcttgttggtggggtagtggcttaccaaggctttgacgggtagccggcctgagagggtgaccggccacattgggactgagatacggcccagactcctacgggaggcagcagtggggaatattgcacaatgggcggaagcctgatgcagcaacgccgcgtgcgggatgacggccttcgggttgtaaaccgctttcgcctgtgacgaagcgtgagtgacggtaatgggtaaagaagcaccggctaactacgtgccagcagccgcggtgatacgtagggtgcgagcgttgt…	Bacteria;	k__Bacteria;p__Actinobacteria;c__Actinobacteria;o__Actinomycetales;f__Propionibacteriaceae;g__Propionibacterium;s__acnes;	Unclassified;	Bacteria;"Actinobacteria";Actinobacteria;Actinobacteridae;Actinomycetales;Propionibacterineae;Propionibacteriaceae;Propionibacterium;	Bacteria;Actinobacteria;Actinobacteria;Propionibacteriales;Propionibacteriaceae;Cutibacterium;
AM063_203	cttgacttggggataacttcaggaaactggggctaataccggataggagctcctgctgcatggtgggggttggaaagtttcggcggttggggatggactcgcggcttatcagcttgttggtggggtagtggcttaccaaggctttgacgggtagccggcctgagagggtgaccggccacattgggactgagatacggcccagactcctacgggaggcagcagtggggaatattgcacaatgggtggaagcctgatgcagcaacgccgtgtgcgggatgacggccttcgggttgtaaaccgctttcgctcatgacgaagctttgtgtgacggtagtgggtaaagaagcaccggctaactacgtgccagcagccgcggtgatacgtagggtgcgagcgttg…	Unclassified;	k__Bacteria;p__Actinobacteria;c__Actinobacteria;o__Actinomycetales;f__Propionibacteriaceae;g__Propionibacterium;s__acnes;	Unclassified;	Bacteria;"Actinobacteria";Actinobacteria;Actinobacteridae;Actinomycetales;Propionibacterineae;Propionibacteriaceae;Propionibacterium;	Bacteria;Actinobacteria;Actinobacteria;Propionibacteriales;Propionibacteriaceae;Cutibacterium;
AM063_204	tataagactgggataacttcgggaaaccggagctaataccggataatatattgaaccgcatggttcaatagtgaaagacggttttgctgtcacttatagatggatccgcgccgcattagctagttggtaaggtaacggcttaccaaggcaacgatgcgtagccgacctgagagggtgatcggccacactggaactgagacacggtccagactcctacgggaggcagcagtagggaatcttccgcaatgggcgaaagcctgacggagcaacgccgcgtgagtgatgaaggtcttcggatcgtaaaactctgttattagggaagaacaaatgtgtaagtaactatgcacgtcttgacggtacctaatcagaaagccacggctaactacgtgccagcagccg…	Bacteria;Firmicutes;Bacilli;Bacillales;Staphylococcaceae;Staphylococcus;	k__Bacteria;p__Firmicutes;c__Bacilli;o__Bacillales;f__Staphylococcaceae;g__Staphylococcus;s__epidermidis;	Unclassified;	Bacteria;Firmicutes;Bacilli;Bacillales;Staphylococcaceae;Staphylococcus;	Bacteria;Firmicutes;Bacilli;Bacillales;Staphylococcaceae;Staphylococcus;
AM063_205	tataagactgggataacttcgggaaaccggagctaataccggataatatattgaaccgcatggttcaatagtgaaagacggttttgctgtcacttatagatggatccgcgccgcattagctagttggtaaggtaacggcttaccaaggcaacgatgcgtagccgacctgagagggtgatcggccacactggaactgagacacggtccagactcctacgggaggcagcagtagggaatcttccgcaatgggcgaaagcctgacggagcaacgccgcgtgagtgatgaaggtcttcggatcgtaaaactctgttattagggaagaacaaatgtgtaagtaactatgcacgtcttgacggtacctaatcagaaagccacggctaactacgtgccagcagccg…	Bacteria;Firmicutes;Bacilli;Bacillales;Staphylococcaceae;Staphylococcus;	k__Bacteria;p__Firmicutes;c__Bacilli;o__Bacillales;f__Staphylococcaceae;g__Staphylococcus;s__epidermidis;	Unclassified;	Bacteria;Firmicutes;Bacilli;Bacillales;Staphylococcaceae;Staphylococcus;	Bacteria;Firmicutes;Bacilli;Bacillales;Staphylococcaceae;Staphylococcus;
AM063_206	tataagactgggataacttcgggaaaccggagctaataccggataacatttggaaccgcatggttctaaagtgaaagatggttttgctatcacttatagatggacccgcgccgtattagctagttggtaaggtaacggcttaccaaggcgacgatacgtagccgacctgagagggtgatcggccacactggaactgagacacggtccagactcctacgggaggcagcagtagggaatcttccgcaatgggcgaaagcctgacggagcaacgccgcgtgagtgatgaagggtttcggctcgtaaaactctgttattagggaagaacaaatgtgtaagtaactgtgcacgtcttgacggtacctaatcagaaagccacggctaactacgtgccagcagccg…	Bacteria;Firmicutes;Bacilli;Bacillales;Staphylococcaceae;Staphylococcus;	k__Bacteria;p__Firmicutes;c__Bacilli;o__Bacillales;f__Staphylococcaceae;g__Staphylococcus;	Unclassified;	Bacteria;Firmicutes;Bacilli;Bacillales;Staphylococcaceae;Staphylococcus;	Bacteria;Firmicutes;Bacilli;Bacillales;Staphylococcaceae;Staphylococcus;
AM063_207	cttgactttgggataacttcaggaaactggggctaataccggataggagctcctgctgcatggtgggggttggaaagtttcggcggttggggatggactcgcggcttatcagcttgttggtggggtagtggcttaccaaggctttgacgggtagccggcctgagagggtgaccggccacattgggactgagatacggcccagactcctacgggaggcagcagtggggaatattgcacaatgggcggaagcctgatgcagcaacgccgcgtgcgggatgacggccttcgggttgtaaaccgctttcgcctgtgacgaagcgtgagtgacggtaatgggtaaagaagcaccggctaactacgtgccagcagccgcggtgatacgtagggtgcgagcgttgt…	Bacteria;	k__Bacteria;p__Actinobacteria;c__Actinobacteria;o__Actinomycetales;f__Propionibacteriaceae;g__Propionibacterium;s__acnes;	Unclassified;	Bacteria;"Actinobacteria";Actinobacteria;Actinobacteridae;Actinomycetales;Propionibacterineae;Propionibacteriaceae;Propionibacterium;	Bacteria;Actinobacteria;Actinobacteria;Propionibacteriales;Propionibacteriaceae;Cutibacterium;
AM063_208	tataagactgggataacttcgggaaaccggagctaataccggataatatattgaaccgcatggttcaatagtgaaagacggttttgctgtcacttatagatggatccgcgccgcattagctagttggtaaggtaacggcttaccaaggcaacgatgcgtagccgacctgagagggtgatcggccacactggaactgagacacggtccagactcctacgggaggcagcagtagggaatcttccgcaatgggcgaaagcctgacggagcaacgccgcgtgagtgatgaaggtcttcggatcgtaaaactctgttattagggaagaacaaatgtgtaagtaactatgcacgtcttgacggtacctaatcagaaagccacggctaactacgtgccagcagccg…	Bacteria;	k__Bacteria;p__Firmicutes;c__Bacilli;o__Bacillales;f__Staphylococcaceae;g__Staphylococcus;s__epidermidis;	Unclassified;	Bacteria;Firmicutes;Bacilli;Bacillales;Staphylococcaceae;Staphylococcus;	Bacteria;Firmicutes;Bacilli;Bacillales;Staphylococcaceae;Staphylococcus;
AM063_401	catggtaaanctaaatcttgtagaagtaggacctaataccggataacntttggaaccgcatggttctaaagtgaaagatggttttgctatcacttatagatggacccgcgccgtattagctagttggtaaggtaacggcttaccaaggcgacgatacgtagccgacctgagagggtgatcggccacactggaactgagacacggtccagactcctacgggaggcagcagtagggaatcttccgcaatgggcgaaagcctgacggagcaacgccgcgtgagtgatgaagggtttcggctcgtaaaactctgttattagggaagaacaaacgtgtaagtaactgtgcacgtcttgacggtacctaatcagaaagccacggctaactacgtgccagcagccg…	Bacteria;Firmicutes;Bacilli;Bacillales;Staphylococcaceae;Staphylococcus;	k__Bacteria;p__Firmicutes;c__Bacilli;o__Bacillales;f__Staphylococcaceae;g__Staphylococcus;	Bacteria;Firmicutes;Bacilli;Bacillales;Staphylococcaceae;Staphylococcus;	Bacteria;Firmicutes;Bacilli;Bacillales;Staphylococcaceae;Staphylococcus;	Bacteria;Firmicutes;Bacilli;Bacillales;Staphylococcaceae;Staphylococcus;
AM063_402	tataagactgggataacttcgggaaaccggagctaataccggataatatttcgaaccgcatggttcgatagtgaaagatggctttgctatcacttatagatggacctgcgccgtattagctagttggtaaggtaacggcttaccaaggcaacgatacgtagccgacctgagagggtgatcggccacactggaactgagacacggtccagactcctacgggaggcagcagtagggaatcttccgcaatgggcgaaagcctgacggagcaacgccgcgtgagtgatgaaggtcttcggatcgtaaaactctgttattagggaagaacaaacgtgtaagtaactgtgcacgtcttgacggtacctaatcagaaagccacggctaactacgtgccagcagccg…	Bacteria;	k__Bacteria;p__Firmicutes;c__Bacilli;o__Bacillales;f__Staphylococcaceae;g__Staphylococcus;	Unclassified;	Bacteria;Firmicutes;Bacilli;Bacillales;Staphylococcaceae;Staphylococcus;	Bacteria;Firmicutes;Bacilli;Bacillales;Staphylococcaceae;Staphylococcus;
AM063_601	tataagactgggataacttcgggaaaccggagctaataccggataacatttggaaccgcatggttctaaagtgaaagatggttttgctatcacttatagatggacccgcgccgtattagctagttggtaaggtaacggcttaccaaggcgacgatacgtagccgacctgagagggtgatcggccacactggaactgagacacggtccagactcctacgggaggcagcagtagggaatcttccgcaatgggcgaaagcctgacggagcaacgccgcgtgagtgatgaagggtttcggctcgtaaaactctgttattagggaagaacaaatgtgtaagtaactgtgcacgtcttgacggtacctaatcagaaagccacggctaactacgtgccagcagccg…	Bacteria;Firmicutes;Bacilli;Bacillales;Staphylococcaceae;Staphylococcus;	k__Bacteria;p__Firmicutes;c__Bacilli;o__Bacillales;f__Staphylococcaceae;g__Staphylococcus;	Unclassified;	Bacteria;Firmicutes;Bacilli;Bacillales;Staphylococcaceae;Staphylococcus;	Bacteria;Firmicutes;Bacilli;Bacillales;Staphylococcaceae;Staphylococcus;
AM063_602	tataagactgggataacttcgggaaaccggagctaataccggataacatttggaaccgcatggttctaaagtgaaagatggttttgctatcacttatagatggacccgcgccgtattagctagttggtaaggtaacggcttaccaaggcgacgatacgtagccgacctgagagggtgatcggccacactggaactgagacacggtccagactcctacgggaggcagcagtagggaatcttccgcaatgggcgaaagcctgacggagcaacgccgcgtgagtgatgaagggtttcggctcgtaaaactctgttattagggaagaacaaacgtgtaagtaactgtgcacgtcttgacggtacctaatcagaaagccacggctaactacgtgccagcagccg…	Bacteria;Firmicutes;Bacilli;Bacillales;Staphylococcaceae;Staphylococcus;	k__Bacteria;p__Firmicutes;c__Bacilli;o__Bacillales;f__Staphylococcaceae;g__Staphylococcus;	Bacteria;Firmicutes;Bacilli;Bacillales;Staphylococcaceae;Staphylococcus;	Bacteria;Firmicutes;Bacilli;Bacillales;Staphylococcaceae;Staphylococcus;	Bacteria;Firmicutes;Bacilli;Bacillales;Staphylococcaceae;Staphylococcus;
AM063_701	tataagactggaataactccgggaaaccggggctaatgccggataacatttagaaccgcatggttctaaagtgaaagatggttttgctatcacttatagatggacccgcgccgtattagctagttggtaaggtaacggcttaccaaggcaacgatacgtagccgacctgagagggtgatcggccacactggaactgagacacggtccagactcctacgggaggcagcagtagggaatcttccgcaatgggcgaaagcctgacggagcaacgccgcgtgagtgatgaaggtcttcggatcgtaaaactctgttattagggaagaacaaatgtgtaagtaactgtgcacgtcttgacggtacctaatcagaaagccacggctaactacgtgccagcagccg…	Bacteria;Firmicutes;Bacilli;	k__Bacteria;p__Firmicutes;c__Bacilli;o__Bacillales;f__Staphylococcaceae;g__Staphylococcus;	Bacteria;Firmicutes;Bacilli;Bacillales;Staphylococcaceae;Staphylococcus;	Bacteria;Firmicutes;Bacilli;Bacillales;Staphylococcaceae;Staphylococcus;	Bacteria;Firmicutes;Bacilli;Bacillales;Staphylococcaceae;Staphylococcus;
AM063_703	tatggnactggaataactccgggaaaccggggctaatgccggataacatttagaaccgcatggttctaaagtgaaagatggttttgctatcacttatagatggacccgcgccgtattagctagttggtaaggtaacggcttaccaaggcaacgatacgtagccgacctgagagggtgatcggccacactggaactgagacacggtccagactcctacgggaggcagcagtagggaatcttccgcaatgggcgaaagcctgacggagcaacgccgcgtgagtgatgaaggtcttcggatcgtaaaactctgttattagggaagaacaaatgtgtaagtaactgtgcacgtcttgacggtacctaatcagaaagccacggctaactacgtgccagcagccg…	Bacteria;Firmicutes;Bacilli;	k__Bacteria;p__Firmicutes;c__Bacilli;o__Bacillales;f__Staphylococcaceae;g__Staphylococcus;	Bacteria;Firmicutes;Bacilli;Bacillales;Staphylococcaceae;Staphylococcus;	Bacteria;Firmicutes;Bacilli;Bacillales;Staphylococcaceae;Staphylococcus;	Bacteria;Firmicutes;Bacilli;Bacillales;Staphylococcaceae;Staphylococcus;
AM064_001	tataagactgggataacttcgggaaaccggagctaataccggataatatttcgaaccgcatggttcgatagtgaaagatggctttgctatcacttatagatggacctgcgccgtattagctagttggtaaggtaacggcttaccaaggcaacgatacgtagccgacctgagagggtgatcggccacactggaactgagacacggtccagactcctacgggaggcagcagtagggaatcttccgcaatgggcgaaagcctgacggagcaacgccgcgtgagtgatgaaggtcttcggatcgtaaaactctgttattagggaagaacaaacgtgtaagtaactgtgcacgtcttgacggtacctaatcagaaagccacggctaactacgtgccagcagccg…	Bacteria;	k__Bacteria;p__Firmicutes;c__Bacilli;o__Bacillales;f__Staphylococcaceae;g__Staphylococcus;	Unclassified;	Bacteria;Firmicutes;Bacilli;Bacillales;Staphylococcaceae;Staphylococcus;	Bacteria;Firmicutes;Bacilli;Bacillales;Staphylococcaceae;Staphylococcus;
AM064_002	tataagactgggataacttcgggaaaccggagctaataccggataatatattgaaccgcatggttcaatagtgaaagacggttttgctgtcacttatagatggatccgcgccgcattagctagttggtaaggtaacggcttaccaaggcaacgatgcgtagccgacctgagagggtgatcggccacactggaactgagacacggtccagactcctacgggaggcagcagtagggaatcttccgcaatgggcgaaagcctgacggagcaacgccgcgtgagtgatgaaggtcttcggatcgtaaaactctgttattagggaagaacaaatgtgtaagtaactatgcacgtcttgacggtacctaatcagaaagccacggctaactacgtgccagcagccg…	Bacteria;Firmicutes;Bacilli;Bacillales;Staphylococcaceae;Staphylococcus;	k__Bacteria;p__Firmicutes;c__Bacilli;o__Bacillales;f__Staphylococcaceae;g__Staphylococcus;s__epidermidis;	Unclassified;	Bacteria;Firmicutes;Bacilli;Bacillales;Staphylococcaceae;Staphylococcus;	Bacteria;Firmicutes;Bacilli;Bacillales;Staphylococcaceae;Staphylococcus;
AM065_002	tataagactgggataacttcgggaaaccggagctaataccggataatatttcgaaccgcatggttcgatagtgaaagatggctctgctatcacttatagatggacctgcgccgtattagctagttggtaaggtaacggcttaccaaggcaacgatacgtagccgacctgagagggtgatcggccacactggaactgagacacggtccagactcctacgggaggcagcagtagggaatcttccgcaatgggcgaaagcctgacggagcaacgccgcgtgagtgatgaaggtcttcggatcgtaaaactctgttattagggaagaacaaacgtgtaagtaactgtgcacgtcttgacggtacctaatcagaaagccacggctaactacgtgccagcagccg…	Bacteria;Firmicutes;Bacilli;Bacillales;Staphylococcaceae;Staphylococcus;	k__Bacteria;p__Firmicutes;c__Bacilli;o__Bacillales;f__Staphylococcaceae;g__Staphylococcus;	Unclassified;	Bacteria;Firmicutes;Bacilli;Bacillales;Staphylococcaceae;Staphylococcus;	Bacteria;Firmicutes;Bacilli;Bacillales;Staphylococcaceae;Staphylococcus;
AM065_003	tataagactgggataacttcgggaaaccggagctaataccggataatatttcgaaccgcatggttcgatagtgaaagatggctctgctatcacttatagatggacctgcgccgtattagctagttggtaaggtaacggcttaccaaggcaacgatacgtagccgacctgagagggtgatcggccacactggaactgagacacggtccagactcctacgggaggcagcagtagggaatcttccgcaatgggcgaaagcctgacggagcaacgccgcgtgagtgatgaaggtcttcggatcgtaaaactctgttattagggaagaacaaacgtgtaagtaactgtgcacgtcttgacggtacctaatcagaaagccacggctaactacgtgccagcagccg…	Bacteria;Firmicutes;Bacilli;Bacillales;Staphylococcaceae;Staphylococcus;	k__Bacteria;p__Firmicutes;c__Bacilli;o__Bacillales;f__Staphylococcaceae;g__Staphylococcus;	Unclassified;	Bacteria;Firmicutes;Bacilli;Bacillales;Staphylococcaceae;Staphylococcus;	Bacteria;Firmicutes;Bacilli;Bacillales;Staphylococcaceae;Staphylococcus;
AM065_004	cttaactctgggataagcctgggaaactgggtctaataccggataggagcgtccaccgcatggtgggtgttggaaagatttatcggttttggatggactcgcggcctatcagcttgttggtgaggtaatggctcaccaaggcgacgacgggtagccggcctgagagggtgaccggccacactgggactgagacacggcccagactcctacgggaggcagcagtggggaatattgcacaatgggcgcaagcctgatgcagcgacgccgcgtgagggatgacggccttcgggttgtaaacctctttcagtagggaagaagcgaaagtgacggtacctgcagaagaagcaccggctaactacgtgccagcagccgcggtaatacgtagggtgcgagcgttat…	Bacteria;Actinobacteria;Micrococcales;Micrococcaceae;Micrococcus;	k__Bacteria;p__Actinobacteria;c__Actinobacteria;o__Actinomycetales;f__Micrococcaceae;g__Micrococcus;s__luteus;	Unclassified;	Bacteria;"Actinobacteria";Actinobacteria;Actinobacteridae;Actinomycetales;Micrococcineae;Micrococcaceae;Micrococcus;	Bacteria;Actinobacteria;Actinobacteria;Micrococcales;Micrococcaceae;Micrococcus;
AM065_006	tgtaagactgggataactccgggaaaccggggctaataccggataattctttccctcacatgagggaaagctgaaagatggtttcggctatcacttacagatgggcccgcggcgcattagctagttggtgaggtaacggctcaccaaggcaacgatgcgtagccgacctgagagggtgatcggccacactgggactgagacacggcccagactcctacgggaggcagcagtagggaatcttccgcaatggacgaaagtctgacggagcaacgccgcgtgagtgatgaaggttttcggatcgtaaaactctgttgttagggaagaacaagtaccggagtaactgccggtaccttgacggtacctaaccagaaagccacggctaactacgtgccagcagcc…	Bacteria;Firmicutes;Bacilli;Bacillales;Bacillaceae;Bacillus;	k__Bacteria;p__Firmicutes;c__Bacilli;o__Bacillales;f__Bacillaceae;g__Bacillus;s__firmus;	Unclassified;	Bacteria;Firmicutes;Bacilli;Bacillales;Bacillaceae 1;Bacillus;	Bacteria;Firmicutes;Bacilli;Bacillales;Bacillaceae;Bacillus;
AM065_007	ctgtagattgggataactccgggaaaccggggctaataccgaataatccatttcctcacatggggagatgttaaaagacggcttctcgctgtcactacnggaggggcccgcggcgcattagctagttggtgaggtaacggctcaccaaggcaacaatgcgtagccaacctgagagggtgatcggccacactgggactgaaacacggcccaaactcctacgggaggcagcagtagggaatcttccacaatggacaaaagtctgatggagcaatgccgcgtgagtgaagaaggttttcggatcgtaaaactctgttgtgagggaagaacaagtacaagagtaactgctcgtaccttgacggtacctcattagaaagccacggctaactacgtgccagcagc…	Bacteria;Firmicutes;Bacilli;Bacillales;Bacillaceae;	k__Bacteria;p__Firmicutes;c__Bacilli;o__Bacillales;f__Planococcaceae;	Bacteria;Firmicutes;Bacilli;Bacillales;Bacillaceae;Psychrobacillus;	Bacteria;Firmicutes;Bacilli;Bacillales;Planococcaceae;Planococcaceae_incertae_sedis;	Bacteria;Firmicutes;Bacilli;Bacillales;Planococcaceae;Psychrobacillus;
AM065_008	cataagactgggataactccgggaaaccggggctaataccggataacattttgaaccgcatggttcgaaattgaaaggcggcttcggctgtcacttatggatggacccgcgtcgcattagctagttggtgaggtaacggctcaccaaggcaacgatgcgtagccgacctgagagggtgatcggccacactgggactgagacacggcccagactcctacgggaggcagcagtagggaatcttccgcaatggacgaaagtctgacggagcaacgccgcgtgagtgatgaaggctttcgggtcgtaaaactctgttgttagggaagaacaagtgctagttgaataagctggcaccttgacggtacctaaccagaaagccacggctaactacgtgccagcagc…	Bacteria;Firmicutes;Bacilli;Bacillales;Bacillaceae;Bacillus;Bacillus cereus group;	k__Bacteria;p__Firmicutes;c__Bacilli;o__Bacillales;f__Bacillaceae;	Unclassified;	Bacteria;Firmicutes;Bacilli;Bacillales;Bacillaceae 1;Bacillus;	Bacteria;Firmicutes;Bacilli;Bacillales;Bacillaceae;Bacillus;
AM065_009	tataanactgggataacttcgggaaaccggagctaataccggataatatttcgaaccgcatggttcgatagtgaaagatggctttgctatcacttatagatggacctgcgccgtattagctagttggtaaggtaacggcttaccaaggcaacgatacgtagccgacctgagagggtgatcggccacactggaactgagacacggtccagactcctacgggaggcagcagtagggaatcttccgcaatgggcgaaagcctgacggagcaacgccgcgtgagtgatgaaggtcttcggatcgtaaaactctgttattagggaagaacaaacgtgtaagtaactgtgcacgtcttgacggtacctaatcagaaagccacggctaactacgtgccagcagccg…	Bacteria;	k__Bacteria;p__Firmicutes;c__Bacilli;o__Bacillales;f__Staphylococcaceae;g__Staphylococcus;	Unclassified;	Bacteria;Firmicutes;Bacilli;Bacillales;Staphylococcaceae;Staphylococcus;	Bacteria;Firmicutes;Bacilli;Bacillales;Staphylococcaceae;Staphylococcus;
AM065_010	tataagactgggataacttcgggaaaccggagctaataccggataatatttcgaaccgcatggttcgatagtgaaagatggctttgctatcacttatagatggacctgcgccgtattagctagttggtaaggtaacggcttaccaaggcaacgatacgtagccgacctgagagggtgatcggccacactggaactgagacacggtccagactcctacgggaggcagcagtagggaatcttccgcaatgggcgaaagcctgacggagcaacgccgcgtgagtgatgaaggtcttcggatcgtaaaactctgttattagggaagaacaaacgtgtaagtaactgtgcacgtcttgacggtacctaatcagaaagccacggctaactacgtgccagcagccg…	Bacteria;	k__Bacteria;p__Firmicutes;c__Bacilli;o__Bacillales;f__Staphylococcaceae;g__Staphylococcus;	Unclassified;	Bacteria;Firmicutes;Bacilli;Bacillales;Staphylococcaceae;Staphylococcus;	Bacteria;Firmicutes;Bacilli;Bacillales;Staphylococcaceae;Staphylococcus;
AM065_011	tataagactgggataacttcgggaaaccggagctaataccggataatatattgaaccgcatggttcaatagtgaaagacggttttgctgtcacttatagatggatccgcgccgcattagctagttggtaaggtaacggcttaccaaggcaacgatgcgtagccgacctgagagggtgatcggccacactggaactgagacacggtccagactcctacgggaggcagcagtagggaatcttccgcaatgggcgaaagcctgacggagcaacgccgcgtgagtgatgaaggtcttcggatcgtaaaactctgttattagggaagaacaaatgtgtaagtaactatgcacgtcttgacggtacctaatcagaaagccacggctaactacgtgccagcagccg…	Bacteria;	k__Bacteria;p__Firmicutes;c__Bacilli;o__Bacillales;f__Staphylococcaceae;g__Staphylococcus;s__epidermidis;	Unclassified;	Bacteria;Firmicutes;Bacilli;Bacillales;Staphylococcaceae;Staphylococcus;	Bacteria;Firmicutes;Bacilli;Bacillales;Staphylococcaceae;Staphylococcus;
AM065_013	tatggnactgggataacttcgggaaaccggagctaataccggataatatttcgaaccgcatggttcgatagtgaaagatggctttgctatcacttatagatggacctgcgccgtattagctagttggtaaggtaacggcttaccaaggcaacgatacgtagccgacctgagagggtgatcggccacactggaactgagacacggtccagactcctacgggaggcagcagtagggaatcttccgcaatgggcgaaagcctgacggagcaacgccgcgtgagtgatgaaggtcttcggatcgtaaaactctgttattagggaagaacaaacgtgtaagtaactgtgcacgtcttgacggtacctaatcagaaagccacggctaactacgtgccagcagccg…	Bacteria;	k__Bacteria;p__Firmicutes;c__Bacilli;o__Bacillales;f__Staphylococcaceae;g__Staphylococcus;	Unclassified;	Bacteria;Firmicutes;Bacilli;Bacillales;Staphylococcaceae;Staphylococcus;	Bacteria;Firmicutes;Bacilli;Bacillales;Staphylococcaceae;Staphylococcus;
AM065_014	tatggnactgggataacttcgggaaaccggagctaataccggataatatattgaaccgcatggttcaatagtgaaagacggttttgctgtcacttatagatggatccgcgccgcattagctagttggtaaggtaacggcttaccaaggcaacgatgcgtagccgacctgagagggtgatcggccacactggaactgagacacggtccagactcctacgggaggcagcagtagggaatcttccgcaatgggcgaaagcctgacggagcaacgccgcgtgagtgatgaaggtcttcggatcgtaaaactctgttattagggaagaacaaatgtgtaagtaactatgcacgtcttgacggtacctaatcagaaagccacggctaactacgtgccagcagccg…	Bacteria;	k__Bacteria;p__Firmicutes;c__Bacilli;o__Bacillales;f__Staphylococcaceae;g__Staphylococcus;s__epidermidis;	Unclassified;	Bacteria;Firmicutes;Bacilli;Bacillales;Staphylococcaceae;Staphylococcus;	Bacteria;Firmicutes;Bacilli;Bacillales;Staphylococcaceae;Staphylococcus;
AM065_015	tataagactgggataacttcgggaaaccggagctaataccggataatatttcgaaccgcatggttcgatagtgaaagatggctttgctatcacttatagatggacctgcgccgtattagctagttggtaaggtaacggcttaccaaggcaacgatacgtagccgacctgagagggtgatcggccacactggaactgagacacggtccagactcctacgggaggcagcagtagggaatcttccgcaatgggcgaaagcctgacggagcaacgccgcgtgagtgatgaaggtcttcggatcgtaaaactctgttattagggaagaacaaacgtgtaagtaactgtgcacgtcttgacggtacctaatcagaaagccacggctaactacgtgccagcagccg…	Bacteria;	k__Bacteria;p__Firmicutes;c__Bacilli;o__Bacillales;f__Staphylococcaceae;g__Staphylococcus;	Unclassified;	Bacteria;Firmicutes;Bacilli;Bacillales;Staphylococcaceae;Staphylococcus;	Bacteria;Firmicutes;Bacilli;Bacillales;Staphylococcaceae;Staphylococcus;
AM065_017	tataagactgggataacttcgggaaaccggagctaataccggataatatattgaaccgcatggttcaatagtgaaagacggttttgctgtcacttatagatggatccgcgccgcattagctagttggtaaggtaacggcttaccaaggcaacgatgcgtagccgacctgagagggtgatcggccacactggaactgagacacggtccagactcctacgggaggcagcagtagggaatcttccgcaatgggcgaaagcctgacggagcaacgccgcgtgagtgatgaaggtcttcggatcgtaaaactctgttattagggaagaacaaatgtgtaagtaactatgcacgtcttgacggtacctaatcagaaagccacggctaactacgtgccagcagccg…	Bacteria;	k__Bacteria;p__Firmicutes;c__Bacilli;o__Bacillales;f__Staphylococcaceae;g__Staphylococcus;s__epidermidis;	Bacteria;Firmicutes;Bacilli;Bacillales;Staphylococcaceae;Staphylococcus;	Bacteria;Firmicutes;Bacilli;Bacillales;Staphylococcaceae;Staphylococcus;	Bacteria;Firmicutes;Bacilli;Bacillales;Staphylococcaceae;Staphylococcus;
AM066_001	tataagactgggataacttcgggaaaccggagctaataccggataatatattgaaccgcatggttcaatagtgaaagacggttttgctgtcacttatagatggatccgcgccgcattagctagttggtaaggtaacggcttaccaaggcaacgatgcgtagccgacctgagagggtgatcggccacactggaactgagacacggtccagactcctacgggaggcagcagtagggaatcttccgcaatgggcgaaagcctgacggagcaacgccgcgtgagtgatgaaggtcttcggatcgtaaaactctgttattagggaagaacaaatgtgtaagtaactatgcacgtcttgacggtacctaatcagaaagccacggctaactacgtgccagcagccg…	Bacteria;	k__Bacteria;p__Firmicutes;c__Bacilli;o__Bacillales;f__Staphylococcaceae;g__Staphylococcus;s__epidermidis;	Unclassified;	Bacteria;Firmicutes;Bacilli;Bacillales;Staphylococcaceae;Staphylococcus;	Bacteria;Firmicutes;Bacilli;Bacillales;Staphylococcaceae;Staphylococcus;
AM066_002	tataagactgggataacttcgggaaaccggagctaataccggataatatattgaaccgcatggttcaatagtgaaagacggttttgctgtcacttatagatggatccgcgccgcattagctagttggtaaggtaacggcttaccaaggcaacgatgcgtagccgacctgagagggtgatcggccacactggaactgagacacggtccagactcctacgggaggcagcagtagggaatcttccgcaatgggcgaaagcctgacggagcaacgccgcgtgagtgatgaaggtcttcggatcgtaaaactctgttattagggaagaacaaatgtgtaagtaactatgcacgtcttgacggtacctaatcagaaagccacggctaactacgtgccagcagccg…	Bacteria;Firmicutes;Bacilli;Bacillales;Staphylococcaceae;Staphylococcus;	k__Bacteria;p__Firmicutes;c__Bacilli;o__Bacillales;f__Staphylococcaceae;g__Staphylococcus;s__epidermidis;	Unclassified;	Bacteria;Firmicutes;Bacilli;Bacillales;Staphylococcaceae;Staphylococcus;	Bacteria;Firmicutes;Bacilli;Bacillales;Staphylococcaceae;Staphylococcus;
AM066_003	ctgacatggtagattttaatggggaactggttctaataccggataggagcgtccaccgcatggtgggtgttggaaagatttatcggttttggatggactcgcggcctatcagcttgttggtgaggtaatggctcaccaaggcgacgacgggtagccggcctgagagggtgaccggccacactgggactgagacacggcccagactcctacgggaggcagcagtggggaatattgcacaatgggcgcaagcctgatgcagcgacgccgcgtgagggatgacggccttcgggttgtaaacctctttcagtagggaagaagcgaaagtgacggtacctgcagaagaagcaccggctaactacgtgccagcagccgcggtaatacgtagggtgcgagcgtatc…	Bacteria;Actinobacteria;Micrococcales;Micrococcaceae;Micrococcus;	k__Bacteria;p__Actinobacteria;c__Actinobacteria;o__Actinomycetales;f__Micrococcaceae;g__Micrococcus;s__luteus;	Unclassified;	Bacteria;"Actinobacteria";Actinobacteria;Actinobacteridae;Actinomycetales;Micrococcineae;Micrococcaceae;Micrococcus;	Bacteria;Actinobacteria;Actinobacteria;Micrococcales;Micrococcaceae;Micrococcus;
AM066_009	ctttggactgggataactaccggaaacggtagctaataccagataattcacttcttcgcatggagaagtgaggaaagacggagcaatctgtcaccggaggatgggcctgcggcgcattagctagttggagaggtaacggctccccaaggcgacgatgcgtagccgacctgagagggtgatcggccacactgggactgagacacggcccagactcctacgggaggcagcagtagggaatcttccgcaatgggcgaaagcctgacggagcaacgccgcgtgagtgatgaaggttttcggatcgtaaagctctgttgccaaggaagaacgtccttaagagtaactgcttaaggagtgacggtacttgagaagaaagccccggctaactacgtgccagcagcc…	Bacteria;Firmicutes;Bacilli;Bacillales;Paenibacillaceae;Paenibacillus;	k__Bacteria;p__Firmicutes;c__Bacilli;o__Bacillales;f__Paenibacillaceae;g__Paenibacillus;	Bacteria;Firmicutes;Bacilli;Bacillales;Paenibacillaceae;Paenibacillus;	Bacteria;Firmicutes;Bacilli;Bacillales;Paenibacillaceae 1;Paenibacillus;	Bacteria;Firmicutes;Bacilli;Bacillales;Paenibacillaceae;Paenibacillus;
AM066_010	tataagactgggataacttcgggaaaccggagctaataccggataacatgttgaaccgcatggttcaacagtgaaagacggtcttgctgtcacttatagatggatccgcgccgcattagctagttggtaaggtaacggcttaccaaggcaacgatgcgtagccgacctgagagggtgatcggccacactggaactgagacacggtccagactcctacgggaggcagcagtagggaatcttccgcaatgggcgaaagcctgacggagcaacgccgcgtgagtgaagaaggtcttcggatcgtaaaactctgttattagggaagaacaaatgtgtaagtaactatgcacgtcttgacggtacctaatcagaaagccacggctaactacgtgccagcagccg…	Bacteria;	k__Bacteria;p__Firmicutes;c__Bacilli;o__Bacillales;f__Staphylococcaceae;g__Staphylococcus;	Unclassified;	Bacteria;Firmicutes;Bacilli;Bacillales;Staphylococcaceae;Staphylococcus;	Bacteria;Firmicutes;Bacilli;Bacillales;Staphylococcaceae;Staphylococcus;
AM066_015	tataagactgggataacttcgggaaaccggagctaataccggataacatgttgaaccgcatggttcaacagtgaaagacggtcttgctgtcacttatagatggatccgcgccgcattagctagttggtaaggtaacggcttaccaaggcaacgatgcgtagccgacctgagagggtgatcggccacactggaactgagacacggtccagactcctacgggaggcagcagtagggaatcttccgcaatgggcgaaagcctgacggagcaacgccgcgtgagtgaagaaggtcttcggatcgtaaaactctgttattagggaagaacaaatgtgtaagtaactatgcacgtcttgacggtacctaatcagaaagccacggctaactacgtgccagcagccg…	Bacteria;	k__Bacteria;p__Firmicutes;c__Bacilli;o__Bacillales;f__Staphylococcaceae;g__Staphylococcus;	Unclassified;	Bacteria;Firmicutes;Bacilli;Bacillales;Staphylococcaceae;Staphylococcus;	Bacteria;Firmicutes;Bacilli;Bacillales;Staphylococcaceae;Staphylococcus;
AM066_016	tataagactgggataacttcgggaaaccggagctaataccggataacatgttgaaccgcatggttcaacagtgaaagacggtcttgctgtcacttatagatggatccgcgccgcattagctagttggtaaggtaacggcttaccaaggcaacgatgcgtagccgacctgagagggtgatcggccacactggaactgagacacggtccagactcctacgggaggcagcagtagggaatcttccgcaatgggcgaaagcctgacggagcaacgccgcgtgagtgaagaaggtcttcggatcgtaaaactctgttattagggaagaacaaatgtgtaagtaactatgcacgtcttgacggtacctaatcagaaagccacggctaactacgtgccagcagccg…	Bacteria;	k__Bacteria;p__Firmicutes;c__Bacilli;o__Bacillales;f__Staphylococcaceae;g__Staphylococcus;	Unclassified;	Bacteria;Firmicutes;Bacilli;Bacillales;Staphylococcaceae;Staphylococcus;	Bacteria;Firmicutes;Bacilli;Bacillales;Staphylococcaceae;Staphylococcus;
AM066_101	ctaacatggtagatcttaatcgggaactggtacatctaaacgatggaaacgtccaccgcatggtgggtgttggaaagatttatcggttttggatggactcgcggcctatcagcttgttggtgaggtaatggctcaccaaggcgacgacgggtagccggcctgagagggtgaccggccacactgggactgagacacggcccagactcctacgggaggcagcagtggggaatattgcacaatgggcgcaagcctgatgcagcgacgccgcgtgagggatgacggccttcgggttgtaaacctctttcagtagggaagaagcgaaagtgacggtacctgcagaagaagcaccggctaactacgtgccagcagccgcggtaatacgtagggtgcgagcgttat…	Bacteria;Actinobacteria;Micrococcales;Micrococcaceae;Micrococcus;	k__Bacteria;p__Actinobacteria;c__Actinobacteria;o__Actinomycetales;f__Micrococcaceae;g__Micrococcus;s__luteus;	Unclassified;	Bacteria;"Actinobacteria";Actinobacteria;Actinobacteridae;Actinomycetales;Micrococcineae;Micrococcaceae;Micrococcus;	Bacteria;Actinobacteria;Actinobacteria;Micrococcales;Micrococcaceae;Micrococcus;
AM066_103	tataagactgggataacttcgggaaaccggagctaataccggataacatgttgaaccgcatggttcaacagtgaaagacggtcttgctgtcacttatagatggatccgcgccgcattagctagttggtaaggtaacggcttaccaaggcaacgatgcgtagccgacctgagagggtgatcggccacactggaactgagacacggtccagactcctacgggaggcagcagtagggaatcttccgcaatgggcgaaagcctgacggagcaacgccgcgtgagtgaagaaggtcttcggatcgtaaaactctgttattagggaagaacaaatgtgtaagtaactatgcacgtcttgacggtacctaatcagaaagccacggctaactacgtgccagcagccg…	Bacteria;	k__Bacteria;p__Firmicutes;c__Bacilli;o__Bacillales;f__Staphylococcaceae;g__Staphylococcus;	Unclassified;	Bacteria;Firmicutes;Bacilli;Bacillales;Staphylococcaceae;Staphylococcus;	Bacteria;Firmicutes;Bacilli;Bacillales;Staphylococcaceae;Staphylococcus;
AM066_105	catgantgggggacaacatctcgaaagggatgctaataccgcatacgtcctacgggagaaagcaggggaccttcgggccttgcgctaatagatgagcctaagtcggattagctagttggtggggtaaaggcctaccaaggcgacgatctgtagcgggtctgagaggatgatccgccacactgggactgagacacggcccagactcctacgggaggcagcagtggggaatattggacaatggggggaaccctgatccagccatgccgcgtgtgtgaagaaggccttttggttgtaaagcactttaagcgaggaggaggctaccgagattaatactcttggatagtggacgttactcgcagaataagcaccggctaactctgtgccagcagccgcggtaat…	Bacteria;	k__Bacteria;p__Proteobacteria;c__Gammaproteobacteria;o__Pseudomonadales;f__Moraxellaceae;g__Acinetobacter;s__lwoffii;	Unclassified;	Bacteria;"Proteobacteria";Gammaproteobacteria;Pseudomonadales;Moraxellaceae;Acinetobacter;	Bacteria;Proteobacteria;Gammaproteobacteria;Pseudomonadales;Moraxellaceae;Acinetobacter;
AM066_106	tataagactgggataacttcgggaaaccggagctaataccggataatatttcgaaccgcatggttcgatagtgaaagatggctttgctatcacttatagatggacctgcgccgtattagctagttggtaaggtaacggcttaccaaggcaacgatacgtagccgacctgagagggtgatcggccacactggaactgagacacggtccagactcctacgggaggcagcagtagggaatcttccgcaatgggcgaaagcctgacggagcaacgccgcgtgagtgatgaaggtcttcggatcgtaaaactctgttattagggaagaacaaacgtgtaagtaactgtgcacgtcttgacggtacctaatcagaaagccacggctaactacgtgccagcagccg…	Bacteria;	k__Bacteria;p__Firmicutes;c__Bacilli;o__Bacillales;f__Staphylococcaceae;g__Staphylococcus;	Unclassified;	Bacteria;Firmicutes;Bacilli;Bacillales;Staphylococcaceae;Staphylococcus;	Bacteria;Firmicutes;Bacilli;Bacillales;Staphylococcaceae;Staphylococcus;
AM066_107	tataagactgggataacttcgggaaaccggagctaataccggataatatttcgaaccgcatggttcgatagtgaaagatggctttgctatcacttatagatggacctgcgccgtattagctagttggtaaggtaacggcttaccaaggcaacgatacgtagccgacctgagagggtgatcggccacactggaactgagacacggtccagactcctacgggaggcagcagtagggaatcttccgcaatgggcgaaagcctgacggagcaacgccgcgtgagtgatgaaggtcttcggatcgtaaaactctgttattagggaagaacaaacgtgtaagtaactgtgcacgtcttgacggtacctaatcagaaagccacggctaactacgtgccagcagccg…	Bacteria;	k__Bacteria;p__Firmicutes;c__Bacilli;o__Bacillales;f__Staphylococcaceae;g__Staphylococcus;	Unclassified;	Bacteria;Firmicutes;Bacilli;Bacillales;Staphylococcaceae;Staphylococcus;	Bacteria;Firmicutes;Bacilli;Bacillales;Staphylococcaceae;Staphylococcus;
AM066_401	tattagtgggggacaacatctcgaaagggatgctaataccgcatacgtcctacgggagaaagcaggggaccttcgggccttgcgctaatagatgagcctaagtcggattagctagttggtggggtaaaggcctaccaaggcgacgatctgtagcgggtctgagaggatgatccgccacactgggactgagacacggcccagactcctacgggaggcagcagtggggaatattggacaatggggggaaccctgatccagccatgccgcgtgtgtgaagaaggccttttggttgtaaagcactttaagcgaggaggaggctaccgagattaatactcttggatagtggacgttactcgcagaataagcaccggctaactctgtgccagcagccgcggtaat…	Bacteria;	k__Bacteria;p__Proteobacteria;c__Gammaproteobacteria;o__Pseudomonadales;f__Moraxellaceae;g__Acinetobacter;s__lwoffii;	Unclassified;	Bacteria;"Proteobacteria";Gammaproteobacteria;Pseudomonadales;Moraxellaceae;Acinetobacter;	Bacteria;Proteobacteria;Gammaproteobacteria;Pseudomonadales;Moraxellaceae;Acinetobacter;
AM066_402	cgtagntcgtaacacggtagggttcggtcttactcagggaaacttgtgctaataccgaatgtgcccttcgggggaaagatttatcgccattagagcggcccgcgtctgattagctagttggtgaggtaaaggctcaccaaggcgacgatcagtagctggtctgagaggatgaccagccacactgggactgagacacggcccagactcctacgggaggcagcagtggggaatcttgcgcaatgggcgaaagcctgacgcagccatgccgcgtgaatgatgaaggtcttaggattgtaaaattctttcaccggggacgataatgacggtacccggagaagaagccccggctaacttcgtgccagcagccgcggtaatacgaagggggctagcgttgctcgg…	Bacteria;Proteobacteria;Alphaproteobacteria;Caulobacterales;Caulobacteraceae;Brevundimonas;	k__Bacteria;p__Proteobacteria;c__Alphaproteobacteria;o__Caulobacterales;f__Caulobacteraceae;	Bacteria;Proteobacteria;Alphaproteobacteria;Caulobacterales;Caulobacteraceae;Brevundimonas;	Bacteria;"Proteobacteria";Alphaproteobacteria;Caulobacterales;Caulobacteraceae;Brevundimonas;	Bacteria;Proteobacteria;Alphaproteobacteria;Caulobacterales;Caulobacteraceae;Brevundimonas;
AM066_403	tataagactgggataacttcgggaaaccggagctaataccggataatatattgaaccgcatggttcaatagtgaaagacggttttgctgtcacttatagatggatccgcgccgcattagctagttggtaaggtaacggcttaccaaggcaacgatgcgtagccgacctgagagggtgatcggccacactggaactgagacacggtccagactcctacgggaggcagcagtagggaatcttccgcaatgggcgaaagcctgacggagcaacgccgcgtgagtgatgaaggtcttcggatcgtaaaactctgttattagggaagaacaaatgtgtaagtaactatgcacgtcttgacggtacctaatcagaaagccacggctaactacgtgccagcagccg…	Bacteria;Firmicutes;Bacilli;Bacillales;Staphylococcaceae;Staphylococcus;	k__Bacteria;p__Firmicutes;c__Bacilli;o__Bacillales;f__Staphylococcaceae;g__Staphylococcus;s__epidermidis;	Unclassified;	Bacteria;Firmicutes;Bacilli;Bacillales;Staphylococcaceae;Staphylococcus;	Bacteria;Firmicutes;Bacilli;Bacillales;Staphylococcaceae;Staphylococcus;
AM066_801	tataagactgggataacttcgggaaaccggagctaataccggataatatattgaaccgcatggttcaatagtgaaagacggttttgctgtcacttatagatggatccgcgccgcattagctagttggtaaggtaacggcttaccaaggcaacgatgcgtagccgacctgagagggtgatcggccacactggaactgagacacggtccagactcctacgggaggcagcagtagggaatcttccgcaatgggcgaaagcctgacggagcaacgccgcgtgagtgatgaaggtcttcggatcgtaaaactctgttattagggaagaacaaatgtgtaagtaactatgcacgtcttgacggtacctaatcagaaagccacggctaactacgtgccagcagccg…	Bacteria;	k__Bacteria;p__Firmicutes;c__Bacilli;o__Bacillales;f__Staphylococcaceae;g__Staphylococcus;s__epidermidis;	Unclassified;	Bacteria;Firmicutes;Bacilli;Bacillales;Staphylococcaceae;Staphylococcus;	Bacteria;Firmicutes;Bacilli;Bacillales;Staphylococcaceae;Staphylococcus;
AM067_002	tataagactgggataacttcgggaaaccggagctaataccggataatatattgaaccgcatggttcaatagtgaaagacggttttgctgtcacttatagatggatccgcgccgcattagctagttggtaaggtaacggcttaccaaggcaacgatgcgtagccgacctgagagggtgatcggccacactggaactgagacacggtccagactcctacgggaggcagcagtagggaatcttccgcaatgggcgaaagcctgacggagcaacgccgcgtgaatgatgaaggtcttcggatcgtaaaactctgttattagggaagaacaaatgtgtaagtaactatgcacgtcttgacggtacctaatcagaaagccacggctaactacgtgccagcagccg…	Bacteria;	k__Bacteria;p__Firmicutes;c__Bacilli;o__Bacillales;f__Staphylococcaceae;g__Staphylococcus;s__epidermidis;	Unclassified;	Bacteria;Firmicutes;Bacilli;Bacillales;Staphylococcaceae;Staphylococcus;	Bacteria;Firmicutes;Bacilli;Bacillales;Staphylococcaceae;Staphylococcus;
AM067_003	tataagactgggataacttcgggaaaccggagctaataccggataatatattgaaccgcatggttcaatagtgaaagacggttttgctgtcacttatagatggatccgcgccgcattagctagttggtaaggtaacggcttaccaaggcaacgatgcgtagccgacctgagagggtgatcggccacactggaactgagacacggtccagactcctacgggaggcagcagtagggaatcttccgcaatgggcgaaagcctgacggagcaacgccgcgtgagtgatgaaggtcttcggatcgtaaaactctgttattagggaagaacaaatgtgtaagtaactatgcacgtcttgacggtacctaatcagaaagccacggctaactacgtgccagcagccg…	Bacteria;Firmicutes;Bacilli;Bacillales;Staphylococcaceae;Staphylococcus;	k__Bacteria;p__Firmicutes;c__Bacilli;o__Bacillales;f__Staphylococcaceae;g__Staphylococcus;s__epidermidis;	Unclassified;	Bacteria;Firmicutes;Bacilli;Bacillales;Staphylococcaceae;Staphylococcus;	Bacteria;Firmicutes;Bacilli;Bacillales;Staphylococcaceae;Staphylococcus;
AM067_005	tataanactgggataacttcgggaaaccggagctaataccggataatatttcgaaccgcatggttcgatagtgaaagatggctttgctatcacttatagatggacctgcgccgtattagctagttggtaaggtaacggcttaccaaggcaacgatacgtagccgacctgagagggtgatcggccacactggaactgagacacggtccagactcctacgggaggcagcagtagggaatcttccgcaatgggcgaaagcctgacggagcaacgccgcgtgagtgatgaaggtcttcggatcgtaaaactctgttattagggaagaacaaacgtgtaagtaactgtgcacgtcttgacggtacctaatcagaaagccacggctaactacgtgccagcagccg…	Bacteria;	k__Bacteria;p__Firmicutes;c__Bacilli;o__Bacillales;f__Staphylococcaceae;g__Staphylococcus;	Unclassified;	Bacteria;Firmicutes;Bacilli;Bacillales;Staphylococcaceae;Staphylococcus;	Bacteria;Firmicutes;Bacilli;Bacillales;Staphylococcaceae;Staphylococcus;
AM067_006	tataanactgggataacttcgggaaaccggagctaataccggataatatttcgaaccgcatggttcgatagtgaaagatggttttgctatcacttatagatggacccgcgccgtattagctagttggtaaggtaacggcttaccaaggcgacgatacgtagccgacctgagagggtgatcggccacactggaactgagacacggtccagactcctacgggaggcagcagtagggaatcttccgcaatgggcgaaagcctgacggagcaacgccgcgtgagtgatgaaggtcttcggatcgtaaaactctgttattagggaagaacatacgtgtaagtaactatgcacgtcttgacggtacctaatcagaaagccacggctaactacgtgccagcagccg…	Bacteria;	k__Bacteria;p__Firmicutes;c__Bacilli;o__Bacillales;f__Staphylococcaceae;g__Staphylococcus;s__haemolyticus;	Unclassified;	Bacteria;Firmicutes;Bacilli;Bacillales;Staphylococcaceae;Staphylococcus;	Bacteria;Firmicutes;Bacilli;Bacillales;Staphylococcaceae;Staphylococcus;
AM067_007	tataagactgggataacttcgggaaaccggagctaataccggataatatttcgaaccgcatggttcgatagtgaaagatggctttgctatcacttatagatggacctgcgccgtattagctagttggtaaggtaacggcttaccaaggcaacgatacgtagccgacctgagagggtgatcggccacactggaactgagacacggtccagactcctacgggaggcagcagtagggaatcttccgcaatgggcgaaagcctgacggagcaacgccgcgtgagtgatgaaggtcttcggatcgtaaaactctgttattagggaagaacaaacgtgtaagtaactgtgcacgtcttgacggtacctaatcagaaagccacggctaactacgtgccagcagccg…	Bacteria;	k__Bacteria;p__Firmicutes;c__Bacilli;o__Bacillales;f__Staphylococcaceae;g__Staphylococcus;	Unclassified;	Bacteria;Firmicutes;Bacilli;Bacillales;Staphylococcaceae;Staphylococcus;	Bacteria;Firmicutes;Bacilli;Bacillales;Staphylococcaceae;Staphylococcus;
AM067_010	tataagactgggataacttcgggaaaccggagctaataccggataatatattgaaccgcatggttcaatagtgaaagacggttttgctgtcacttatagatggatccgcgccgcattagctagttggtaaggtaacggcttaccaaggcaacgatgcgtagccgacctgagagggtgatcggccacactggaactgagacacggtccagactcctacgggaggcagcagtagggaatcttccgcaatgggcgaaagcctgacggagcaacgccgcgtgagtgatgaaggtcttcggatcgtaaaactctgttattagggaagaacaaatgtgtaagtaactatgcacgtcttgacggtacctaatcagaaagccacggctaactacgtgccagcagccg…	Bacteria;Firmicutes;Bacilli;Bacillales;Staphylococcaceae;Staphylococcus;	k__Bacteria;p__Firmicutes;c__Bacilli;o__Bacillales;f__Staphylococcaceae;g__Staphylococcus;s__epidermidis;	Unclassified;	Bacteria;Firmicutes;Bacilli;Bacillales;Staphylococcaceae;Staphylococcus;	Bacteria;Firmicutes;Bacilli;Bacillales;Staphylococcaceae;Staphylococcus;
AM069_001	tataagactgggataacttcgggaaaccggagctaataccggataatatattgaaccgcatggttcaatagtgaaagacggttttgctgtcacttatagatggatccgcgccgcattagctagttggtaaggtaacggcttaccaaggcaacgatgcgtagccgacctgagagggtgatcggccacactggaactgagacacggtccagactcctacgggaggcagcagtagggaatcttccgcaatgggcgaaagcctgacggagcaacgccgcgtgagtgatgaaggtcttcggatcgtaaaactctgttattagggaagaacaaatgtgtaagtaactatgcacgtcttgacggtacctaatcagaaagccacggctaactacgtgccagcagccg…	Bacteria;	k__Bacteria;p__Firmicutes;c__Bacilli;o__Bacillales;f__Staphylococcaceae;g__Staphylococcus;s__epidermidis;	Unclassified;	Bacteria;Firmicutes;Bacilli;Bacillales;Staphylococcaceae;Staphylococcus;	Bacteria;Firmicutes;Bacilli;Bacillales;Staphylococcaceae;Staphylococcus;
AM069_002	tataagactgggataacttcgggaaaccggagctaataccggataatatttcgaaccgcatggttcgatagtgaaagatggctctgctatcacttatagatggacctgcgccgtattagctagttggtaaggtaacggcttaccaaggcaacgatacgtagccgacctgagagggtgatcggccacactggaactgagacacggtccagactcctacgggaggcagcagtagggaatcttccgcaatgggcgaaagcctgacggagcaacgccgcgtgagtgatgaaggtcttcggatcgtaaaactctgttattagggaagaacaaacgtgtaagtaactgtgcacgtcttgacggtacctaatcagaaagccacggctaactacgtgccagcagccg…	Bacteria;Firmicutes;Bacilli;Bacillales;Staphylococcaceae;Staphylococcus;	k__Bacteria;p__Firmicutes;c__Bacilli;o__Bacillales;f__Staphylococcaceae;g__Staphylococcus;	Unclassified;	Bacteria;Firmicutes;Bacilli;Bacillales;Staphylococcaceae;Staphylococcus;	Bacteria;Firmicutes;Bacilli;Bacillales;Staphylococcaceae;Staphylococcus;
AM069_003	tataagactgggataacttcgggaaaccggagctaataccggataatatttcgaaccgcatggttcgatagtgaaagatggctttgctatcacttatagatggacctgcgccgtattagctagttggtaaggtaacggcttaccaaggcaacgatacgtagccgacctgagagggtgatcggccacactggaactgagacacggtccagactcctacgggaggcagcagtagggaatcttccgcaatgggcgaaagcctgacggagcaacgccgcgtgagtgatgaaggtcttcggatcgtaaaactctgttattagggaagaacaaacgtgtaagtaactgtgcacgtcttgacggtacctaatcagaaagccacggctaactacgtgccagcagccg…	Bacteria;	k__Bacteria;p__Firmicutes;c__Bacilli;o__Bacillales;f__Staphylococcaceae;g__Staphylococcus;	Unclassified;	Bacteria;Firmicutes;Bacilli;Bacillales;Staphylococcaceae;Staphylococcus;	Bacteria;Firmicutes;Bacilli;Bacillales;Staphylococcaceae;Staphylococcus;
AM069_004	tataagactgggataacttcgggaaaccggagctaataccggataatatattgaaccgcatggttcaatagtgaaagacggttttgctgtcacttatagatggatccgcgccgcattagctagttggtaaggtaacggcttaccaaggcaacgatgcgtagccgacctgagagggtgatcggccacactggaactgagacacggtccagactcctacgggaggcagcagtagggaatcttccgcaatgggcgaaagcctgacggagcaacgccgcgtgagtgatgaaggtcttcggatcgtaaaactctgttattagggaagaacaaatgtgtaagtaactatgcacgtcttgacggtacctaatcagaaagccacggctaactacgtgccagcagccg…	Bacteria;Firmicutes;Bacilli;Bacillales;Staphylococcaceae;Staphylococcus;	k__Bacteria;p__Firmicutes;c__Bacilli;o__Bacillales;f__Staphylococcaceae;g__Staphylococcus;s__epidermidis;	Unclassified;	Bacteria;Firmicutes;Bacilli;Bacillales;Staphylococcaceae;Staphylococcus;	Bacteria;Firmicutes;Bacilli;Bacillales;Staphylococcaceae;Staphylococcus;
AM069_005	tataagactgggataacttcgggaaaccggagctaataccggataatatattgaaccgcatggttcaatagtgaaagacggttttgctgtcacttatagatggatccgcgccgcattagctagttggtaaggtaacggcttaccaaggcaacgatgcgtagccgacctgagagggtgatcggccacactggaactgagacacggtccagactcctacgggaggcagcagtagggaatcttccgcaatgggcgaaagcctgacggagcaacgccgcgtgagtgatgaaggtcttcggatcgtaaaactctgttattagggaagaacaaatgtgtaagtaactatgcacgtcttgacggtacctaatcagaaagccacggctaactacgtgccagcagccg…	Bacteria;Firmicutes;Bacilli;Bacillales;Staphylococcaceae;Staphylococcus;	k__Bacteria;p__Firmicutes;c__Bacilli;o__Bacillales;f__Staphylococcaceae;g__Staphylococcus;s__epidermidis;	Unclassified;	Bacteria;Firmicutes;Bacilli;Bacillales;Staphylococcaceae;Staphylococcus;	Bacteria;Firmicutes;Bacilli;Bacillales;Staphylococcaceae;Staphylococcus;
AM069_006	tataagactgggataacttcgggaaaccggagctaataccggataatatttcgaaccgcatggttcgatagtgaaagatggctttgctatcacttatagatggacctgcgccgtattagctagttggtaaggtaacggcttaccaaggcaacgatacgtagccgacctgagagggtgatcggccacactggaactgagacacggtccagactcctacgggaggcagcagtagggaatcttccgcaatgggcgaaagcctgacggagcaacgccgcgtgagtgatgaaggtcttcggatcgtaaaactctgttattagggaagaacaaacgtgtaagtaactgtgcacgtcttgacggtacctaatcagaaagccacggctaactacgtgccagcagccg…	Bacteria;	k__Bacteria;p__Firmicutes;c__Bacilli;o__Bacillales;f__Staphylococcaceae;g__Staphylococcus;	Unclassified;	Bacteria;Firmicutes;Bacilli;Bacillales;Staphylococcaceae;Staphylococcus;	Bacteria;Firmicutes;Bacilli;Bacillales;Staphylococcaceae;Staphylococcus;
AM069_007	tgtaagactgggataacttcgggaaaccggagctaataccggataatcctttccctctcatgagggaaagctgaaagacggtttcggctgtcacttacagatgggcccgcggcgcattagctagttggtgaggtaacggctcaccaaggcgacgatgcgtagccgacctgagagggtgatcggccacactgggactgagacacggcccagactcctacgggaggcagcagtagggaatcttccgcaatggacgaaagtctgacggagcaacgccgcgtgagcgatgaaggccttcgggtcgtaaagctctgttgtcagggaagaacaagtaccggagtaactgccggtaccttgacggtacctgaccagaaagccacggctaactacgtgccagcagcc…	Bacteria;Firmicutes;Bacilli;Bacillales;Bacillaceae;Bacillus;	k__Bacteria;p__Firmicutes;c__Bacilli;o__Bacillales;f__Bacillaceae;g__Bacillus;s__selenatarsenatis;	Unclassified;	Bacteria;Firmicutes;Bacilli;Bacillales;Bacillaceae 1;Bacillus;	Bacteria;Firmicutes;Bacilli;Bacillales;Bacillaceae;Bacillus;
AM069_008	tataagactgggataacttcgggaaaccggagctaataccggataatatattgaaccgcatggttcaatagtgaaagacggttttgctgtcacttatagatggatccgcgccgcattagctagttggtaaggtaacggcttaccaaggcaacgatgcgtagccgacctgagagggtgatcggccacactggaactgagacacggtccagactcctacgggaggcagcagtagggaatcttccgcaatgggcgaaagcctgacggagcaacgccgcgtgagtgatgaaggtcttcggatcgtaaaactctgttattagggaagaacaaatgtgtaagtaactatgcacgtcttgacggtacctaatcagaaagccacggctaactacgtgccagcagccg…	Bacteria;Firmicutes;Bacilli;Bacillales;Staphylococcaceae;Staphylococcus;	k__Bacteria;p__Firmicutes;c__Bacilli;o__Bacillales;f__Staphylococcaceae;g__Staphylococcus;s__epidermidis;	Unclassified;	Bacteria;Firmicutes;Bacilli;Bacillales;Staphylococcaceae;Staphylococcus;	Bacteria;Firmicutes;Bacilli;Bacillales;Staphylococcaceae;Staphylococcus;
AM069_009	tataagactgggataacttcgggaaaccggagctaataccggataatatttcgaaccgcatggttcgatagtgaaagatggctttgctatcacttatagatggacctgcgccgtattagctagttggtaaggtaacggcttaccaaggcaacgatacgtagccgacctgagagggtgatcggccacactggaactgagacacggtccagactcctacgggaggcagcagtagggaatcttccgcaatgggcgaaagcctgacggagcaacgccgcgtgagtgatgaaggtcttcggatcgtaaaactctgttattagggaagaacaaacgtgtaagtaactgtgcacgtcttgacggtacctaatcagaaagccacggctaactacgtgccagcagccg…	Bacteria;	k__Bacteria;p__Firmicutes;c__Bacilli;o__Bacillales;f__Staphylococcaceae;g__Staphylococcus;	Unclassified;	Bacteria;Firmicutes;Bacilli;Bacillales;Staphylococcaceae;Staphylococcus;	Bacteria;Firmicutes;Bacilli;Bacillales;Staphylococcaceae;Staphylococcus;
AM069_012	tataanactgggataacttcgggaaaccggagctaataccggataatatttcgaaccgcatggttcgatagtgaaagatggctctgctatcacttatagatggacctgcgccgtattagctagttggtaaggtaacggcttaccaaggcaacgatacgtagccgacctgagagggtgatcggccacactggaactgagacacggtccagactcctacgggaggcagcagtagggaatcttccgcaatgggcgaaagcctgacggagcaacgccgcgtgagtgatgaaggtcttcggatcgtaaaactctgttattagggaagaacaaacgtgtaagtaactgtgcacgtcttgacggtacctaatcagaaagccacggctaactacgtgccagcagccg…	Bacteria;Firmicutes;Bacilli;Bacillales;Staphylococcaceae;Staphylococcus;	k__Bacteria;p__Firmicutes;c__Bacilli;o__Bacillales;f__Staphylococcaceae;g__Staphylococcus;	Unclassified;	Bacteria;Firmicutes;Bacilli;Bacillales;Staphylococcaceae;Staphylococcus;	Bacteria;Firmicutes;Bacilli;Bacillales;Staphylococcaceae;Staphylococcus;
AM069_013	tataagactgggataacttcgggaaaccggagctaataccggataatatttcgaaccgcatggttcgatagtgaaagatggctctgctatcacttatagatggacctgcgccgtattagctagttggtaaggtaacggcttaccaaggcaacgatacgtagccgacctgagagggtgatcggccacactggaactgagacacggtccagactcctacgggaggcagcagtagggaatcttccgcaatgggcgaaagcctgacggagcaacgccgcgtgagtgatgaaggtcttcggatcgtaaaactctgttattagggaagaacaaacgtgtaagtaactgtgcacgtcttgacggtacctaatcagaaagccacggctaactacgtgccagcagccg…	Bacteria;Firmicutes;Bacilli;Bacillales;Staphylococcaceae;Staphylococcus;	k__Bacteria;p__Firmicutes;c__Bacilli;o__Bacillales;f__Staphylococcaceae;g__Staphylococcus;	Unclassified;	Bacteria;Firmicutes;Bacilli;Bacillales;Staphylococcaceae;Staphylococcus;	Bacteria;Firmicutes;Bacilli;Bacillales;Staphylococcaceae;Staphylococcus;
AM069_014	tataagactgggataacttcgggaaaccggagctaataccggataatatattgaaccgcatggttcaatagtgaaagacggttttgctgtcacttatagatggatccgcgccgcattagctagttggtaaggtaacggcttaccaaggcaacgatgcgtagccgacctgagagggtgatcggccacactggaactgagacacggtccagactcctacgggaggcagcagtagggaatcttccgcaatgggcgaaagcctgacggagcaacgccgcgtgagtgatgaaggtcttcggatcgtaaaactctgttattagggaagaacaaatgtgtaagtaactatgcacgtcttgacggtacctaatcagaaagccacggctaactacgtgccagcagccg…	Bacteria;Firmicutes;Bacilli;Bacillales;Staphylococcaceae;Staphylococcus;	k__Bacteria;p__Firmicutes;c__Bacilli;o__Bacillales;f__Staphylococcaceae;g__Staphylococcus;s__epidermidis;	Unclassified;	Bacteria;Firmicutes;Bacilli;Bacillales;Staphylococcaceae;Staphylococcus;	Bacteria;Firmicutes;Bacilli;Bacillales;Staphylococcaceae;Staphylococcus;
AM070_001	tgtaagactgggataactccgggaaaccggggctaataccggatggttgtttgaaccgcatggttcagacataaaaggtggcttcggctaccacttacagatggacccgcggcgcattagctagttggtgaggtaacggctcaccaaggcgacgatgcgtagccgacctgagagggtgatcggccacactgggactgagacacggcccagactcctacgggaggcagcagtagggaatcttccgcaatggacgaaagtctgacggagcaacgccgcgtgagtgatgaaggttttcggatcgtaaagctctgttgttagggaagaacaagtgccgttcaaatagggcggcaccttgacggtacctaaccagaaagccacggctaactacgtgccagcagc…	Bacteria;Firmicutes;Bacilli;Bacillales;Bacillaceae;Bacillus;	k__Bacteria;p__Firmicutes;c__Bacilli;o__Bacillales;f__Bacillaceae;g__Bacillus;	Unclassified;	Bacteria;Firmicutes;Bacilli;Bacillales;Bacillaceae 1;Bacillus;	Bacteria;Firmicutes;Bacilli;Bacillales;Bacillaceae;Bacillus;
AM070_003	tataagactgggataacttcgggaaaccggagctaataccggataatatattgaaccgcatggttcaatagtgaaagacggttttgctgtcacttatagatggatccgcgccgcattagctagttggtaaggtaacggcttaccaaggcaacgatgcgtagccgacctgagagggtgatcggccacactggaactgagacacggtccagactcctacgggaggcagcagtagggaatcttccgcaatgggcgaaagcctgacggagcaacgccgcgtgagtgatgaaggtcttcggatcgtaaaactctgttattagggaagaacaaatgtgtaagtaactatgcacgtcttgacggtacctaatcagaaagccacggctaactacgtgccagcagccg…	Bacteria;Firmicutes;Bacilli;Bacillales;Staphylococcaceae;Staphylococcus;	k__Bacteria;p__Firmicutes;c__Bacilli;o__Bacillales;f__Staphylococcaceae;g__Staphylococcus;s__epidermidis;	Unclassified;	Bacteria;Firmicutes;Bacilli;Bacillales;Staphylococcaceae;Staphylococcus;	Bacteria;Firmicutes;Bacilli;Bacillales;Staphylococcaceae;Staphylococcus;
AM070_008	tataagactgggataacttcgggaaaccggagctaataccggataatatttcgaaccgcatggttcgatagtgaaagatggctttgctatcacttatagatggacctgcgccgtattagctagttggtaaggtaacggcttaccaaggcaacgatacgtagccgacctgagagggtgatcggccacactggaactgagacacggtccagactcctacgggaggcagcagtagggaatcttccgcaatgggcgaaagcctgacggagcaacgccgcgtgagtgatgaaggtcttcggatcgtaaaactctgttattagggaagaacaaacgtgtaagtaactgtgcacgtcttgacggtacctaatcagaaagccacggctaactacgtgccagcagccg…	Bacteria;Firmicutes;Bacilli;Bacillales;Staphylococcaceae;Staphylococcus;	k__Bacteria;p__Firmicutes;c__Bacilli;o__Bacillales;f__Staphylococcaceae;g__Staphylococcus;	Bacteria;Firmicutes;Bacilli;Bacillales;Staphylococcaceae;Staphylococcus;	Bacteria;Firmicutes;Bacilli;Bacillales;Staphylococcaceae;Staphylococcus;	Bacteria;Firmicutes;Bacilli;Bacillales;Staphylococcaceae;Staphylococcus;
AM070_013	ctgaggtgggggacaaccccgggaaactggggctaataccgcatatgggctgaggcccaaagccgagaggcgcctttggagcggcctgcgtccgattaggtagttggtggggtaaaggcctaccaagcctgcgatcggtagctggtctgagaggacgaccagccacactgggactgagacacggcccagactcctacgggaggcagcagtggggaatattggacaatgggcgaaagcctgatccagcaatgccgcgtgggtgaagaaggtcttcggatcgtaaagccctttcgacggggacgatgatgacggtacccgtagaagaagccccggctaacttcgtgccagcagccgcggtaatacgaagggggctagcgttgctcggaattactgggcgta…	Bacteria;Proteobacteria;Alphaproteobacteria;Rhodospirillales;Acetobacteraceae;Roseomonas;	k__Bacteria;p__Proteobacteria;c__Alphaproteobacteria;o__Rhodospirillales;f__Acetobacteraceae;g__Roseomonas;s__mucosa;	Bacteria;Proteobacteria;Alphaproteobacteria;Rhodospirillales;Acetobacteraceae;Roseomonas;	Bacteria;"Proteobacteria";Alphaproteobacteria;Rhodospirillales;Acetobacteraceae;Roseomonas;	Bacteria;Proteobacteria;Alphaproteobacteria;Acetobacterales;Acetobacteraceae;Roseomonas;
AM070_014	ctgaggtgggggacaaccccgggaaactggggctaataccgcatatgggctgaggcccaaagccgagaggcgcctttggagcggcctgcgtccgattaggtagttggtggggtaaaggcctaccaagcctgcgatcggtagctggtctgagaggacgaccagccacactgggactgagacacggcccagactcctacgggaggcagcagtggggaatattggacaatgggcgaaagcctgatccagcaatgccgcgtgggtgaagaaggtcttcggatcgtaaagccctttcgacggggacgatgatgacggtacccgtagaagaagccccggctaacttcgtgccagcagccgcggtaatacgaagggggctagcgttgctcggaattactgggcgta…	Bacteria;Proteobacteria;Alphaproteobacteria;Rhodospirillales;Acetobacteraceae;Roseomonas;	k__Bacteria;p__Proteobacteria;c__Alphaproteobacteria;o__Rhodospirillales;f__Acetobacteraceae;g__Roseomonas;s__mucosa;	Bacteria;Proteobacteria;Alphaproteobacteria;Rhodospirillales;Acetobacteraceae;Roseomonas;	Bacteria;"Proteobacteria";Alphaproteobacteria;Rhodospirillales;Acetobacteraceae;Roseomonas;	Bacteria;Proteobacteria;Alphaproteobacteria;Acetobacterales;Acetobacteraceae;Roseomonas;
AM070_104	ctgacatggtagatcttaatggggaactggttcttctaccggataggaacgtccaccgcatggtgggtgttggaaagatttatcggttttggatggactcgcggcctatcagcttgttggtgaggtaatggctcaccaaggcgacgacgggtagccggcctgagagggtgaccggccacactgggactgagacacggcccagactcctacgggaggcagcagtggggaatattgcacaatgggcgcaagcctgatgcagcgacgccgcgtgagggatgacggccttcgggttgtaaacctctttcagtagggaagaagcgaaagtgacggtacctgcagaagaagcaccggctaactacgtgccagcagccgcggtaatacgtagggtgcgagcgttat…	Bacteria;Actinobacteria;Micrococcales;Micrococcaceae;Micrococcus;	k__Bacteria;p__Actinobacteria;c__Actinobacteria;o__Actinomycetales;f__Micrococcaceae;g__Micrococcus;s__luteus;	Unclassified;	Bacteria;"Actinobacteria";Actinobacteria;Actinobacteridae;Actinomycetales;Micrococcineae;Micrococcaceae;Micrococcus;	Bacteria;Actinobacteria;Actinobacteria;Micrococcales;Micrococcaceae;Micrococcus;
AM070_107	tataagactgggataacttcgggaaaccggagctaataccggataatatttcgaaccgcatggttcgatagtgaaagatggctttgctatcacttatagatggacctgcgccgtattagctagttggtaaggtaacggcttaccaaggcaacgatacgtagccgacctgagagggtgatcggccacactggaactgagacacggtccagactcctacgggaggcagcagtagggaatcttccgcaatgggcgaaagcctgacggagcaacgccgcgtgagtgatgaaggtcttcggatcgtaaaactctgttattagggaagaacaaacgtgtaagtaactgtgcacgtcttgacggtacctaatcagaaagccacggctaactacgtgccagcagccg…	Bacteria;	k__Bacteria;p__Firmicutes;c__Bacilli;o__Bacillales;f__Staphylococcaceae;g__Staphylococcus;	Unclassified;	Bacteria;Firmicutes;Bacilli;Bacillales;Staphylococcaceae;Staphylococcus;	Bacteria;Firmicutes;Bacilli;Bacillales;Staphylococcaceae;Staphylococcus;
AM070_109	ctgaggtgggggacaaccccgggaaactggggctaataccgcatatgggctgaggcccaaagccgagaggcgcctttggagcggcctgcgtccgattaggtagttggtggggtaaaggcctaccaagcctgcgatcggtagctggtctgagaggacgaccagccacactgggactgagacacggcccagactcctacgggaggcagcagtggggaatattggacaatgggcgaaagcctgatccagcaatgccgcgtgggtgaagaaggtcttcggatcgtaaagccctttcgacggggacgatgatgacggtacccgtagaagaagccccggctaacttcgtgccagcagccgcggtaatacgaagggggctagcgttgctcggaattactgggcgta…	Bacteria;Proteobacteria;Alphaproteobacteria;Rhodospirillales;Acetobacteraceae;Roseomonas;	k__Bacteria;p__Proteobacteria;c__Alphaproteobacteria;o__Rhodospirillales;f__Acetobacteraceae;g__Roseomonas;s__mucosa;	Bacteria;Proteobacteria;Alphaproteobacteria;Rhodospirillales;Acetobacteraceae;Roseomonas;	Bacteria;"Proteobacteria";Alphaproteobacteria;Rhodospirillales;Acetobacteraceae;Roseomonas;	Bacteria;Proteobacteria;Alphaproteobacteria;Acetobacterales;Acetobacteraceae;Roseomonas;
AM070_201	cttgactttgggataacttcaggaaactggggctaataccggataggagctcctgctgcatggtgggggttggaaagtttcggcggttggggatggactcgcggcttatcagcttgttggtggggtagtggcttaccaaggctttgacgggtagccggcctgagagggtgaccggccacattgggactgagatacggcccagactcctacgggaggcagcagtggggaatattgcacaatgggcggaagcctgatgcagcaacgccgcgtgcgggatgacggccttcgggttgtaaaccgctttcgcctgtgacgaagcgtgagtgacggtaatgggtaaagaagcaccggctaactacgtgccagcagccgcggtgatacgtagggtgcgagcgttgt…	Bacteria;	k__Bacteria;p__Actinobacteria;c__Actinobacteria;o__Actinomycetales;f__Propionibacteriaceae;g__Propionibacterium;s__acnes;	Unclassified;	Bacteria;"Actinobacteria";Actinobacteria;Actinobacteridae;Actinomycetales;Propionibacterineae;Propionibacteriaceae;Propionibacterium;	Bacteria;Actinobacteria;Actinobacteria;Propionibacteriales;Propionibacteriaceae;Cutibacterium;
AM070_202	tataagactgggataacttcgggaaaccggagctaataccggataatatttcgaaccgcatggttcgatagtgaaagatggctttgctatcacttatagatggacctgcgccgtattagctagttggtaaggtaacggcttaccaaggcaacgatacgtagccgacctgagagggtgatcggccacactggaactgagacacggtccagactcctacgggaggcagcagtagggaatcttccgcaatgggcgaaagcctgacggagcaacgccgcgtgagtgatgaaggtcttcggatcgtaaaactctgttattagggaagaacaaacgtgtaagtaactgtgcacgtcttgacggtacctaatcagaaagccacggctaactacgtgccagcagccg…	Bacteria;	k__Bacteria;p__Firmicutes;c__Bacilli;o__Bacillales;f__Staphylococcaceae;g__Staphylococcus;	Unclassified;	Bacteria;Firmicutes;Bacilli;Bacillales;Staphylococcaceae;Staphylococcus;	Bacteria;Firmicutes;Bacilli;Bacillales;Staphylococcaceae;Staphylococcus;
AM070_401	tggtagtgggggacaacgtttcgaaaggaacgctaataccgcatacgtcntacgggagaaagtgggggatcttcggacctcacgctatcagatgagcntaggtcggattagctagttggtggggtaacggctcaccaaggcgacgatccgtaactggtctgagaggatgatcagtcacactggaactgagacacggtccagactcctacgggaggcagcagtggggaatattggacaatgggcgaaagcctgatccagccatgccgcgtgtgtgaagaaggccctcgggtcgtaaagcactttaagctgggaggaagggttgtaacctaatacgttgcagctttgacgttaccagcagaataagcaccggctaactctgtgccagcagccgcggtaata…	Bacteria;	k__Bacteria;p__Proteobacteria;c__Gammaproteobacteria;o__Pseudomonadales;f__Pseudomonadaceae;g__Pseudomonas;	Unclassified;	Bacteria;"Proteobacteria";Gammaproteobacteria;Pseudomonadales;Pseudomonadaceae;Pseudomonas;	Bacteria;Proteobacteria;Gammaproteobacteria;Pseudomonadales;Pseudomonadaceae;Pseudomonas;
AM070_403	cttaactctgggataagcctgggaaactgggtctaataccggataggagcgtccaccgcatggtgggtgttggaaagatttatcggttttggatggactcgcggcctatcagcttgttggtgaggtaatggctcaccaaggcgacgacgggtagccggcctgagagggtgaccggccacactgggactgagacacggcccagactcctacgggaggcagcagtggggaatattgcacaatgggcgcaagcctgatgcagcgacgccgcgtgagggatgacggccttcgggttgtaaacctctttcagtagggaagaagcgaaagtgacggtacctgcagaagaagcaccggctaactacgtgccagcagccgcggtaatacgtagggtgcgagcgttat…	Bacteria;Actinobacteria;Micrococcales;Micrococcaceae;Micrococcus;	k__Bacteria;p__Actinobacteria;c__Actinobacteria;o__Actinomycetales;f__Micrococcaceae;g__Micrococcus;s__luteus;	Unclassified;	Bacteria;"Actinobacteria";Actinobacteria;Actinobacteridae;Actinomycetales;Micrococcineae;Micrococcaceae;Micrococcus;	Bacteria;Actinobacteria;Actinobacteria;Micrococcales;Micrococcaceae;Micrococcus;
AM070_404	ctgaggtgggggacaaccccgggaaactggggctaataccgcatatgggctgaggcccaaagccgagaggcgcctttggagcggcctgcgtccgattaggtagttggtggggtaaaggcctaccaagcctgcgatcggtagctggtctgagaggacgaccagccacactgggactgagacacggcccagactcctacgggaggcagcagtggggaatattggacaatgggcgaaagcctgatccagcaatgccgcgtgggtgaagaaggtcttcggatcgtaaagccctttcgacggggacgatgatgacggtacccgtagaagaagccccggctaacttcgtgccagcagccgcggtaatacgaagggggctagcgttgctcggaattactgggcgta…	Bacteria;Proteobacteria;Alphaproteobacteria;Rhodospirillales;Acetobacteraceae;Roseomonas;	k__Bacteria;p__Proteobacteria;c__Alphaproteobacteria;o__Rhodospirillales;f__Acetobacteraceae;g__Roseomonas;s__mucosa;	Bacteria;Proteobacteria;Alphaproteobacteria;Rhodospirillales;Acetobacteraceae;Roseomonas;	Bacteria;"Proteobacteria";Alphaproteobacteria;Rhodospirillales;Acetobacteraceae;Roseomonas;	Bacteria;Proteobacteria;Alphaproteobacteria;Acetobacterales;Acetobacteraceae;Roseomonas;
AM070_406	tataagactgggataacttcgggaaaccggagctaataccggataatatattgaaccgcatggttcaatagtgaaagacggttttgctgtcacttatagatggatccgcgccgcattagctagttggtaaggtaacggcttaccaaggcaacgatgcgtagccgacctgagagggtgatcggccacactggaactgagacacggtccagactcctacgggaggcagcagtagggaatcttccgcaatgggcgaaagcctgacggagcaacgccgcgtgagtgatgaaggtcttcggatcgtaaaactctgttattagggaagaacaaatgtgtaagtaactatgcacgtcttgacggtacctaatcagaaagccacggctaactacgtgccagcagccg…	Bacteria;Firmicutes;Bacilli;Bacillales;Staphylococcaceae;Staphylococcus;	k__Bacteria;p__Firmicutes;c__Bacilli;o__Bacillales;f__Staphylococcaceae;g__Staphylococcus;s__epidermidis;	Unclassified;	Bacteria;Firmicutes;Bacilli;Bacillales;Staphylococcaceae;Staphylococcus;	Bacteria;Firmicutes;Bacilli;Bacillales;Staphylococcaceae;Staphylococcus;
AM070_504	nngaggtgggggacaaccccgggaaactggggctaataccgcatatgggctgaggcccaaagccgagaggcgcctttggagcggcctgcgtccgattaggtagttggtggggtaaaggcctaccaagcctgcgatcggtagctggtctgagaggacgaccagccacactgggactgagacacggcccagactcctacgggaggcagcagtggggaatattggacaatgggcgaaagcctgatccagcaatgccgcgtgggtgaagaaggtcttcggatcgtaaagccctttcgacggggacgatgatgacggtacccgtagaagaagccccggctaacttcgtgccagcagccgcggtaatacgaagggggctagcgttgctcggaattactgggcgta…	Bacteria;Proteobacteria;Alphaproteobacteria;Rhodospirillales;Acetobacteraceae;Roseomonas;	k__Bacteria;p__Proteobacteria;c__Alphaproteobacteria;o__Rhodospirillales;f__Acetobacteraceae;g__Roseomonas;s__mucosa;	Bacteria;Proteobacteria;Alphaproteobacteria;Rhodospirillales;Acetobacteraceae;Roseomonas;	Bacteria;"Proteobacteria";Alphaproteobacteria;Rhodospirillales;Acetobacteraceae;Roseomonas;	Bacteria;Proteobacteria;Alphaproteobacteria;Acetobacterales;Acetobacteraceae;Roseomonas;
AM070_601	ctgaggtgggggacaaccccgggaaactggggctaataccgcatatgggctgaggcccaaagccgagaggcgcctttggagcggcctgcgtccgattaggtagttggtggggtaaaggcctaccaagcctgcgatcggtagctggtctgagaggacgaccagccacactgggactgagacacggcccagactcctacgggaggcagcagtggggaatattggacaatgggcgaaagcctgatccagcaatgccgcgtgggtgaagaaggtcttcggatcgtaaagccctttcgacggggacgatgatgacggtacccgtagaagaagccccggctaacttcgtgccagcagccgcggtaatacgaagggggctagcgttgctcggaattactgggcgta…	Bacteria;Proteobacteria;Alphaproteobacteria;Rhodospirillales;Acetobacteraceae;Roseomonas;	k__Bacteria;p__Proteobacteria;c__Alphaproteobacteria;o__Rhodospirillales;f__Acetobacteraceae;g__Roseomonas;s__mucosa;	Bacteria;Proteobacteria;Alphaproteobacteria;Rhodospirillales;Acetobacteraceae;Roseomonas;	Bacteria;"Proteobacteria";Alphaproteobacteria;Rhodospirillales;Acetobacteraceae;Roseomonas;	Bacteria;Proteobacteria;Alphaproteobacteria;Acetobacterales;Acetobacteraceae;Roseomonas;
FM054_001	cttcagactgggataactaccggaaacggtagctaataccggataatttcttttttctcctgagagaagaatgaaagacggagcaatctgtcactgagggatgggcctgcggcgcattagctagttggtggggtaacggcccaccaaggcgacgatgcgtagccgacctgagagggtgaacggccacactgggactgagacacggcccagactcctacgggaggcagcagtagggaatcttccgcaatgggcgaaagcctgacggagcaacgccgcgtgagtgatgaaggttttcggatcgtaaagctctgttgccagggaagaacgtccggtagagtaactgctaccggagtgacggtacctgagaagaaagccccggctaactacgtgccagcagcc…	Bacteria;Firmicutes;Bacilli;Bacillales;Paenibacillaceae;Paenibacillus;	k__Bacteria;p__Firmicutes;c__Bacilli;o__Bacillales;f__Paenibacillaceae;g__Paenibacillus;	Unclassified;	Bacteria;Firmicutes;Bacilli;Bacillales;Paenibacillaceae 1;Paenibacillus;	Bacteria;Firmicutes;Bacilli;Bacillales;Paenibacillaceae;Paenibacillus;
FM054_002	tataagactgggataacttcgggaaaccggagctaataccggataatatattgaaccgcatggttcaatagtgaaagacggttttgctgtcacttatagatggatccgcgccgcattagctagttggtaaggtaacggcttaccaaggcaacgatgcgtagccgacctgagagggtgatcggccacactggaactgagacacggtccagactcctacgggaggcagcagtagggaatcttccgcaatgggcgaaagcctgacggagcaacgccgcgtgagtgatgaaggtcttcggatcgtaaaactctgttattagggaagaacaaatgtgtaagtaactatgcacgtcttgacggtacctaatcagaaagccacggctaactacgtgccagcagccg…	Bacteria;	k__Bacteria;p__Firmicutes;c__Bacilli;o__Bacillales;f__Staphylococcaceae;g__Staphylococcus;s__epidermidis;	Unclassified;	Bacteria;Firmicutes;Bacilli;Bacillales;Staphylococcaceae;Staphylococcus;	Bacteria;Firmicutes;Bacilli;Bacillales;Staphylococcaceae;Staphylococcus;
FM054_003	cttcagactgggataactaccggaaacggtagctaataccggataatttcttttttctcctgagagaagaatgaaagacggagcaatctgtcactgagggatgggcctgcggcgcattagctagttggtggggtaacggcccaccaaggcgacgatgcgtagccgacctgagagggtgaacggccacactgggactgagacacggcccagactcctacgggaggcagcagtagggaatcttccgcaatgggcgaaagcctgacggagcaacgccgcgtgagtgatgaaggttttcggatcgtaaagctctgttgccagggaagaacgtccggtagagtaactgctatcggagtgacggtacctgagaagaaagccccggctaactacgtgccagcagcc…	Bacteria;Firmicutes;Bacilli;Bacillales;Paenibacillaceae;Paenibacillus;	k__Bacteria;p__Firmicutes;c__Bacilli;o__Bacillales;f__Paenibacillaceae;g__Paenibacillus;	Unclassified;	Bacteria;Firmicutes;Bacilli;Bacillales;Paenibacillaceae 1;Paenibacillus;	Bacteria;Firmicutes;Bacilli;Bacillales;Paenibacillaceae;Paenibacillus;
FM054_004	cttgactctgggataagcctgggaaactgggtctaatactggatatgacctcctgtcgcatggtggggggtggaaagggtttgtactggttgtggatgggctcacggcctatcagcttgttggtggggtaatggcctaccaaggcgacgacgggtagccggcctgagagggtgaccggccacactgggactgagacacggcccagactcctacgggaggcagcagtggggaatattgcacaatgggcgcaagcctgatgcagcgacgccgcgtgagggatgacggccttcgggttgtaaacctctttcagcacggaagaagcgaaagtgacggtacgtgcagaagaagcgccggctaactacgtgccagcagccgcggtaatacgtagggcgcaagcgt…	Bacteria;	k__Bacteria;p__Actinobacteria;c__Actinobacteria;o__Actinomycetales;f__Micrococcaceae;g__Kocuria;	Unclassified;	Bacteria;"Actinobacteria";Actinobacteria;Actinobacteridae;Actinomycetales;Micrococcineae;Micrococcaceae;Kocuria;	Bacteria;Actinobacteria;Actinobacteria;Micrococcales;Micrococcaceae;Kocuria;
FM054_007	cttaactctgggataagcctgggaaactgggtctaataccggatangagcgtcccaccgcatggtgggtgttggaaagatttatcggttttggatggactcgcggcctatcagcttgttggtgaggtaatggctcaccaaggcgacgacgggtagccggcctgagagggtgaccggccacactgggactgagacacggcccagactcctacgggaggcagcagtggggaatattgcacaatgggcgcaagcctgatgcagcgacgccgcgtgagggatgacggccttcgggttgtaaacctctttcagtagggaagaagcgaaagtgacggtacctgcagaagaagcaccggctaactacgtgccagcagccgcggtaatacgtagggtgcgagcgtta…	Bacteria;Actinobacteria;Micrococcales;Micrococcaceae;Micrococcus;	k__Bacteria;p__Actinobacteria;c__Actinobacteria;o__Actinomycetales;f__Micrococcaceae;g__Micrococcus;s__luteus;	Unclassified;	Bacteria;"Actinobacteria";Actinobacteria;Actinobacteridae;Actinomycetales;Micrococcineae;Micrococcaceae;Micrococcus;	Bacteria;Actinobacteria;Actinobacteria;Micrococcales;Micrococcaceae;Micrococcus;
FM054_009	cttgactctgggataagcctgggaaactgggtctaatactggatatgacctcttgccgcatggtgggaggtggaaagatttattggtcttggatggactcgcggcctatcagcttgttggtgaggtaatggctcaccaaggcgacgacgggtagccggcctgagagggtgaccggccacactgggactgagacacggcccagactcctacgggaggcagcagtggggaatattgcacaatgggcgcaagcctgatgcagcgacgccgcgtgagggatgacggccttcgggttgtaaacctctttcagtagggaagaagcgaaagtgacggtacctgcagaagaagcgccggctaactacgtgccagcagccgcggtaatacgtagggcgcgagcgttat…	Bacteria;Actinobacteria;Micrococcales;Micrococcaceae;Micrococcus;	k__Bacteria;p__Actinobacteria;c__Actinobacteria;o__Actinomycetales;f__Micrococcaceae;	Bacteria;Actinobacteria;Actinobacteria;Micrococcales;Micrococcaceae;Micrococcus;	Bacteria;"Actinobacteria";Actinobacteria;Actinobacteridae;Actinomycetales;Micrococcineae;Micrococcaceae;Micrococcus;	Bacteria;Actinobacteria;Actinobacteria;Micrococcales;Micrococcaceae;Micrococcus;
FM054_010	cttgactctgggataagcctgggaaactgggtctaatactggatatgacctcttgccgcatggtgggaggtggaaagatttattggtcttggatggactcgcggcctatcagcttgttggtgaggtaatggctcaccaaggcgacgacgggtagccggcctgagagggtgaccggccacactgggactgagacacggcccagactcctacgggaggcagcagtggggaatattgcacaatgggcgcaagcctgatgcagcgacgccgcgtgagggatgacggccttcgggttgtaaacctctttcagtagggaagaagcgaaagtgacggtacctgcagaagaagcgccggctaactacgtgccagcagccgcggtaatacgtagggcgcgagcgttat…	Bacteria;Actinobacteria;Micrococcales;Micrococcaceae;Micrococcus;	k__Bacteria;p__Actinobacteria;c__Actinobacteria;o__Actinomycetales;f__Micrococcaceae;	Bacteria;Actinobacteria;Actinobacteria;Micrococcales;Micrococcaceae;Micrococcus;	Bacteria;"Actinobacteria";Actinobacteria;Actinobacteridae;Actinomycetales;Micrococcineae;Micrococcaceae;Micrococcus;	Bacteria;Actinobacteria;Actinobacteria;Micrococcales;Micrococcaceae;Micrococcus;
FM054_011	tgtaagactgggataactccgggaaaccggagctaataccggatagttccttgaaccgcatggttcaaggatgaaagacggtttcggctgtcacttacagatggacccgcggcgcattagctagttggtggggtaatggctcaccaaggcgacgatgcgtagccgacctgagagggtgatcggccacactgggactgagacacggcccagactcctacgggaggcagcagtagggaatcttccgcaatggacgaaagtctgacggagcaacgccgcgtgagtgatgaaggttttcggatcgtaaagctctgttgttagggaagaacaagtgcgagagtaactgctcgcaccttgacggtacctaaccagaaagccacggctaactacgtgccagcagcc…	Bacteria;Firmicutes;Bacilli;Bacillales;Bacillaceae;Bacillus;	k__Bacteria;p__Firmicutes;c__Bacilli;o__Bacillales;f__Bacillaceae;g__Bacillus;	Unclassified;	Bacteria;Firmicutes;Bacilli;Bacillales;Bacillaceae 1;Bacillus;	Bacteria;Firmicutes;Bacilli;Bacillales;Bacillaceae;Bacillus;
FM054_012	ctgcacttcgggataagcctgggaaactgggtctaataccggatattcagttcctgccgcatggtgggggttggaaagtttttcggtgcaggatgagcccgcggcctatcagcttgttggtggggtaatggcctaccaaggcgacgacgggtagccggcctgagagggtgatcggccacactgggactgagacacggcccagactcctacgggaggcagcagtggggaatattgcacaatgggcgaaagcctgatgcagcgacgccgcgtgggggatgacggtcttcggattgtaaacccctttcagtagggacgaagcgcaagtgacggtacctgcagaagaagcaccggccaactacgtgccagcagccgcggtaatacgtagggtgcgagcgttgt…	Bacteria;	k__Bacteria;p__Actinobacteria;c__Actinobacteria;o__Actinomycetales;f__Dietziaceae;g__Dietzia;	Bacteria;Actinobacteria;Actinobacteria;Actinomycetales;Corynebacterineae;Dietziaceae;Dietzia;	Bacteria;"Actinobacteria";Actinobacteria;Actinobacteridae;Actinomycetales;Corynebacterineae;Dietziaceae;Dietzia;	Bacteria;Actinobacteria;Actinobacteria;Corynebacteriales;Dietziaceae;Dietzia;
FM054_017	ctgcacttcnggataagcctgggaaactgggtctaataccggatattcagttcctgccgcatggtgggggttggaaagtttttcggtgcaggatgagcccgcggcctatcagcttgttggtggggtaatggcctaccaaggcgacgacgggtagccggcctgagagggtgatcggccacactgggactgagacacggcccagactcctacgggaggcagcagtggggaatattgcacaatgggcgaaagcctgatgcagcgacgccgcgtgggggatgacggtcttcggattgtaaacccctttcagtagggacgaagcgcaagtgacggtacctgcagaagaagcaccggccaactacgtgccagcagccgcggtaatacgtagggtgcgagcgttgt…	Bacteria;	k__Bacteria;p__Actinobacteria;c__Actinobacteria;o__Actinomycetales;f__Dietziaceae;g__Dietzia;	Bacteria;Actinobacteria;Actinobacteria;Actinomycetales;Corynebacterineae;Dietziaceae;Dietzia;	Bacteria;"Actinobacteria";Actinobacteria;Actinobacteridae;Actinomycetales;Corynebacterineae;Dietziaceae;Dietzia;	Bacteria;Actinobacteria;Actinobacteria;Corynebacteriales;Dietziaceae;Dietzia;
FM054_019	cttanctcggggataagcctggggnactgggactaataccggatatgagcgtctaccgcatggtgggtgttggaaagatttatcggttttggatggactcgcggcctatcagcttgttggtgaggtaatggctcaccaaggcgacgacgggtagccggcctgagagggtgaccggccacactgggactgagacacggcccagactcctacgggaggcagcagtggggaatattgcacaatgggcgaaagcctgatgcagcgacgccgcgtgagggatgacggccttcgggttgtaaacctctttcagtagggaagaagcgaaagtgacggtacctgcagaagaagcaccggctaactacgtgccagcagccgcggtaatacgtagggtgcgagcgttat…	Bacteria;Actinobacteria;Micrococcales;Micrococcaceae;Micrococcus;	k__Bacteria;p__Actinobacteria;c__Actinobacteria;o__Actinomycetales;f__Micrococcaceae;g__Micrococcus;s__luteus;	Bacteria;Actinobacteria;Actinobacteria;Micrococcales;Micrococcaceae;Micrococcus;	Bacteria;"Actinobacteria";Actinobacteria;Actinobacteridae;Actinomycetales;Micrococcineae;Micrococcaceae;Micrococcus;	Bacteria;Actinobacteria;Actinobacteria;Micrococcales;Micrococcaceae;Micrococcus;
FM055_003	tataagactgggataacttcgggaaaccggagctaataccggataatatattgaaccgcatggttcaatagtgaaagacggttttgctgtcacttatagatggatccgcgccgcattagctagttggtaaggtaacggcttaccaaggcaacgatgcgtagccgacctgagagggtgatcggccacactggaactgagacacggtccagactcctacgggaggcagcagtagggaatcttccgcaatgggcgaaagcctgacggagcaacgccgcgtgagtgatgaaggtcttcggatcgtaaaactctgttattagggaagaacaaatgtgtaagtaactatgcacgtcttgacggtacctaatcagaaagccacggctaactacgtgccagcagccg…	Bacteria;	k__Bacteria;p__Firmicutes;c__Bacilli;o__Bacillales;f__Staphylococcaceae;g__Staphylococcus;s__epidermidis;	Unclassified;	Bacteria;Firmicutes;Bacilli;Bacillales;Staphylococcaceae;Staphylococcus;	Bacteria;Firmicutes;Bacilli;Bacillales;Staphylococcaceae;Staphylococcus;
FM055_004	tataagactgggataacttcgggaaaccggagctaataccggataacatattgaaccgcatggttcaatagtgaaaggcggctttgctgtcacttatagatggatccgcgccgtattagctagttggtaaggtaacggcttaccaaggcaacgatacgtagccgacctgagagggtgatcggccacactggaactgagacacggtccagactcctacgggaggcagcagtagggaatcttccgcaatgggcgaaagcctgacggagcaacgccgcgtgagtgatgaaggtcttcggatcgtaaaactctgttatcagggaagaacaaatgtgtaagtaactgtgcacatcttgacggtacctgatcagaaagccacggctaactacgtgccagcagccg…	Bacteria;Firmicutes;Bacilli;Bacillales;Staphylococcaceae;Staphylococcus;	k__Bacteria;p__Firmicutes;c__Bacilli;o__Bacillales;f__Staphylococcaceae;g__Staphylococcus;	Unclassified;	Bacteria;Firmicutes;Bacilli;Bacillales;Staphylococcaceae;Staphylococcus;	Bacteria;Firmicutes;Bacilli;Bacillales;Staphylococcaceae;Staphylococcus;
FM055_005	tataagactgggataacttcgggaaaccggagctaataccggataatatattgaaccgcatggttcaatagtgaaagacggttttgctgtcacttatagatggatccgcgccgcattagctagttggtaaggtaacggcttaccaaggcaacgatgcgtagccgacctgagagggtgatcggccacactggaactgagacacggtccagactcctacgggaggcagcagtagggaatcttccgcaatgggcgaaagcctgacggagcaacgccgcgtgagtgatgaaggtcttcggatcgtaaaactctgttattagggaagaacaaatgtgtaagtaactatgcacgtcttgacggtacctaatcagaaagccacggctaactacgtgccagcagccg…	Bacteria;	k__Bacteria;p__Firmicutes;c__Bacilli;o__Bacillales;f__Staphylococcaceae;g__Staphylococcus;s__epidermidis;	Unclassified;	Bacteria;Firmicutes;Bacilli;Bacillales;Staphylococcaceae;Staphylococcus;	Bacteria;Firmicutes;Bacilli;Bacillales;Staphylococcaceae;Staphylococcus;
FM055_006	tataagactgggataacttcgggaaaccggagctaataccggataatatattgaaccgcatggttcaatagtgaaagacggttttgctgtcacttatagatggatccgcgccgcattagctagttggtaaggtaacggcttaccaaggcaacgatgcgtagccgacctgagagggtgatcggccacactggaactgagacacggtccagactcctacgggaggcagcagtagggaatcttccgcaatgggcgaaagcctgacggagcaacgccgcgtgagtgatgaaggtcttcggatcgtaaaactctgttattagggaagaacaaatgtgtaagtaactatgcacgtcttgacggtacctaatcagaaagccacggctaactacgtgccagcagccg…	Bacteria;	k__Bacteria;p__Firmicutes;c__Bacilli;o__Bacillales;f__Staphylococcaceae;g__Staphylococcus;s__epidermidis;	Unclassified;	Bacteria;Firmicutes;Bacilli;Bacillales;Staphylococcaceae;Staphylococcus;	Bacteria;Firmicutes;Bacilli;Bacillales;Staphylococcaceae;Staphylococcus;
FM055_008	tataagactgggataacttcgggaaaccggagctaataccggataatatattgaaccgcatggttcaatagtgaaagacggttttgctgtcacttatagatggatccgcgccgcattagctagttggtaaggtaacggcttaccaaggcaacgatgcgtagccgacctgagagggtgatcggccacactggaactgagacacggtccagactcctacgggaggcagcagtagggaatcttccgcaatgggcgaaagcctgacggagcaacgccgcgtgagtgatgaaggtcttcggatcgtaaaactctgttattagggaagaacaaatgtgtaagtaactatgcacgtcttgacggtacctaatcagaaagccacggctaactacgtgccagcagccg…	Bacteria;	k__Bacteria;p__Firmicutes;c__Bacilli;o__Bacillales;f__Staphylococcaceae;g__Staphylococcus;s__epidermidis;	Unclassified;	Bacteria;Firmicutes;Bacilli;Bacillales;Staphylococcaceae;Staphylococcus;	Bacteria;Firmicutes;Bacilli;Bacillales;Staphylococcaceae;Staphylococcus;
FM055_009	cttaactctgggataagcctgggaaactgggtctaataccggataggagcgtccaccgcatggtgggtgttggaaagatttatcggttttggatggactcgcggcctatcagcttgttggtgaggtaatggctcaccaaggcgacgacgggtagccggcctgagagggtgaccggccacactgggactgagacacggcccagactcctacgggaggcagcagtggggaatattgcacaatgggcgaaagcctgatgcagcgacgccgcgtgagggatgacggccttcgggttgtaaacctctttcagtagggaagaagcgaaagtgacggtacctgcagaagaagcaccggctaactacgtgccagcagccgcggtaatacgtagggtgcgagcgttat…	Bacteria;Actinobacteria;Micrococcales;Micrococcaceae;Micrococcus;	k__Bacteria;p__Actinobacteria;c__Actinobacteria;o__Actinomycetales;f__Micrococcaceae;g__Micrococcus;s__luteus;	Bacteria;Actinobacteria;Actinobacteria;Micrococcales;Micrococcaceae;Micrococcus;	Bacteria;"Actinobacteria";Actinobacteria;Actinobacteridae;Actinomycetales;Micrococcineae;Micrococcaceae;Micrococcus;	Bacteria;Actinobacteria;Actinobacteria;Micrococcales;Micrococcaceae;Micrococcus;
FM055_010	tataagactgggataacttcgggaaaccggagctaataccggataacatattgaaccgcatggttcaatagtgaaaggcggctttgctgtcacttatagatggatccgcgccgtattagctagttggtaaggtaacggcttaccaaggcaacgatacgtagccgacctgagagggtgatcggccacactggaactgagacacggtccagactcctacgggaggcagcagtagggaatcttccgcaatgggcgaaagcctgacggagcaacgccgcgtgagtgatgaaggtcttcggatcgtaaaactctgttatcagggaagaacaaatgtgtaagtaactgtgcacatcttgacggtacctgatcagaaagccacggctaactacgtgccagcagccg…	Bacteria;Firmicutes;Bacilli;Bacillales;Staphylococcaceae;Staphylococcus;	k__Bacteria;p__Firmicutes;c__Bacilli;o__Bacillales;f__Staphylococcaceae;g__Staphylococcus;	Unclassified;	Bacteria;Firmicutes;Bacilli;Bacillales;Staphylococcaceae;Staphylococcus;	Bacteria;Firmicutes;Bacilli;Bacillales;Staphylococcaceae;Staphylococcus;
FM055_017	tataagactgggataacttcgggaaaccggagctaataccggataatatattgaaccgcatggttcaatagtgaaagacggttttgctgtcacttatagatggatccgcgccgcattagctagttggtaaggtaacggcttaccaaggcaacgatgcgtagccgacctgagagggtgatcggccacactggaactgagacacggtccagactcctacgggaggcagcagtagggaatcttccgcaatgggcgaaagcctgacggagcaacgccgcgtgagtgatgaaggtcttcggatcgtaaaactctgttattagggaagaacaaatgtgtaagtaactatgcacgtcttgacggtacctaatcagaaagccacggctaactacgtgccagcagccg…	Bacteria;Firmicutes;Bacilli;Bacillales;Staphylococcaceae;Staphylococcus;	k__Bacteria;p__Firmicutes;c__Bacilli;o__Bacillales;f__Staphylococcaceae;g__Staphylococcus;s__epidermidis;	Unclassified;	Bacteria;Firmicutes;Bacilli;Bacillales;Staphylococcaceae;Staphylococcus;	Bacteria;Firmicutes;Bacilli;Bacillales;Staphylococcaceae;Staphylococcus;
FM055_019	tataagactgggataacttcgggaaaccggagctaataccggataacatattgaaccgcatggttcaatagtgaaaggcggctttgctgtcacttatagatggatccgcgccgtattagctagttggtaaggtaacggcttaccaaggcaacgatacgtagccgacctgagagggtgatcggccacactggaactgagacacggtccagactcctacgggaggcagcagtagggaatcttccgcaatgggcgaaagcctgacggagcaacgccgcgtgagtgatgaaggtcttcggatcgtaaaactctgttatcagggaagaacaaatgtgtaagtaactgtgcacatcttgacggtacctgatcagaaagccacggctaactacgtgccagcagccg…	Bacteria;Firmicutes;Bacilli;Bacillales;Staphylococcaceae;Staphylococcus;	k__Bacteria;p__Firmicutes;c__Bacilli;o__Bacillales;f__Staphylococcaceae;g__Staphylococcus;	Unclassified;	Bacteria;Firmicutes;Bacilli;Bacillales;Staphylococcaceae;Staphylococcus;	Bacteria;Firmicutes;Bacilli;Bacillales;Staphylococcaceae;Staphylococcus;
FM055_020	tatggnactgggataacttcgggaaaccggagctaataccggataacatattgaaccgcatggttcaatagtgaaaggcggctttgctgtcacttatagatggatccgcgccgtattagctagttggtaaggtaacggcttaccaaggcaacgatacgtagccgacctgagagggtgatcggccacactggaactgagacacggtccagactcctacgggaggcagcagtagggaatcttccgcaatgggcgaaagcctgacggagcaacgccgcgtgagtgatgaaggtcttcggatcgtaaaactctgttatcagggaagaacaaatgtgtaagtaactgtgcacatcttgacggtacctgatcagaaagccacggctaactacgtgccagcagccg…	Bacteria;Firmicutes;Bacilli;Bacillales;Staphylococcaceae;Staphylococcus;	k__Bacteria;p__Firmicutes;c__Bacilli;o__Bacillales;f__Staphylococcaceae;g__Staphylococcus;	Unclassified;	Bacteria;Firmicutes;Bacilli;Bacillales;Staphylococcaceae;Staphylococcus;	Bacteria;Firmicutes;Bacilli;Bacillales;Staphylococcaceae;Staphylococcus;
FM056_001	tattagtgggggacaacatttcgaaagggatgctaataccgcatacgtcctacgggagaaagcaggggatcttcggaccttgcgctaatagatgagcctaagtcggattagctagttggtggggtaaaggcctaccaaggcgacgatctgtagcgggtctgagaggatgatccgccacactgggactgagacacggcccagactcctacgggaggcagcagtggggaatattggacaatggggggaaccctgatccagccatgccgcgtgtgtgaagaaggccttatggttgtaaagcactttaagcgaggaggagggtactggtattaatactaccaggtactggacgttactcgcagaataagcaccggctaactctgtgccagcagccgcggtaat…	Bacteria;	k__Bacteria;p__Proteobacteria;c__Gammaproteobacteria;o__Pseudomonadales;f__Moraxellaceae;g__Acinetobacter;	Unclassified;	Bacteria;"Proteobacteria";Gammaproteobacteria;Pseudomonadales;Moraxellaceae;Acinetobacter;	Bacteria;Proteobacteria;Gammaproteobacteria;Pseudomonadales;Moraxellaceae;Acinetobacter;
FM056_002	tattagtgggggacaacatttcgaaagggatgctaataccgcatacgtcctacgggagaaagcaggggatcttcggaccttgcgctaatagatgagcctaagtcggattagctagttggtggggtaaaggcctaccaaggcgacgatctgtagcgggtctgagaggatgatccgccacactgggactgagacacggcccagactcctacgggaggcagcagtggggaatattggacaatggggggaaccctgatccagccatgccgcgtgtgtgaagaaggccttatggttgtaaagcactttaagcgaggaggagggtactggtattaatactaccaggtactggacgttactcgcagaataagcaccggctaactctgtgccagcagccgcggtaat…	Bacteria;	k__Bacteria;p__Proteobacteria;c__Gammaproteobacteria;o__Pseudomonadales;f__Moraxellaceae;g__Acinetobacter;	Unclassified;	Bacteria;"Proteobacteria";Gammaproteobacteria;Pseudomonadales;Moraxellaceae;Acinetobacter;	Bacteria;Proteobacteria;Gammaproteobacteria;Pseudomonadales;Moraxellaceae;Acinetobacter;
FM056_003	tataagactgggataacttcgggaaaccggagctaataccggataatatattgaaccgcatggttcaatagtgaaagacggttttgctgtcacttatagatggatccgcgccgcattagctagttggtaaggtaacggcttaccaaggcaacgatgcgtagccgacctgagagggtgatcggccacactggaactgagacacggtccagactcctacgggaggcagcagtagggaatcttccgcaatgggcgaaagcctgacggagcaacgccgcgtgagtgatgaaggtcttcggatcgtaaaactctgttattagggaagaacaaatgtgtaagtaactatgcacgtcttgacggtacctaatcagaaagccacggctaactacgtgccagcagccg…	Bacteria;	k__Bacteria;p__Firmicutes;c__Bacilli;o__Bacillales;f__Staphylococcaceae;g__Staphylococcus;s__epidermidis;	Unclassified;	Bacteria;Firmicutes;Bacilli;Bacillales;Staphylococcaceae;Staphylococcus;	Bacteria;Firmicutes;Bacilli;Bacillales;Staphylococcaceae;Staphylococcus;
FM056_004	tataagactggaataactccgggaaaccggggctaatgccggataacatttagaaccgcatggttctaaagtgaaagatggttttgctatcacttatagatggacccgcgccgtattagctagttggtaaggtaacggcttaccaaggcaacgatacgtagccgacctgagagggtgatcggccacactggaactgagacacggtccagactcctacgggaggcagcagtagggaatcttccgcaatgggcgaaagcctgacggagcaacgccgcgtgagtgatgaaggtcttcggatcgtaaaactctgttattagggaagaacaaatgtgtaagtaactgtgcacgtcttgacggtacctaatcagaaagccacggctaactacgtgccagcagccg…	Bacteria;Firmicutes;Bacilli;	k__Bacteria;p__Firmicutes;c__Bacilli;o__Bacillales;f__Staphylococcaceae;g__Staphylococcus;	Bacteria;Firmicutes;Bacilli;Bacillales;Staphylococcaceae;Staphylococcus;	Bacteria;Firmicutes;Bacilli;Bacillales;Staphylococcaceae;Staphylococcus;	Bacteria;Firmicutes;Bacilli;Bacillales;Staphylococcaceae;Staphylococcus;
FM056_005	tataagactgggataacttcgggaaaccggagctaataccggataatatattgaaccgcatggttcaatagtgaaagacggttttgctgtcacttatagatggatccgcgccgcattagctagttggtaaggtaacggcttaccaaggcaacgatgcgtagccgacctgagagggtgatcggccacactggaactgagacacggtccagactcctacgggaggcagcagtagggaatcttccgcaatgggcgaaagcctgacggagcaacgccgcgtgagtgatgaaggtcttcggatcgtaaaactctgttattagggaagaacaaatgtgtaagtaactatgcacgtcttgacggtacctaatcagaaagccacggctaactacgtgccagcagccg…	Bacteria;	k__Bacteria;p__Firmicutes;c__Bacilli;o__Bacillales;f__Staphylococcaceae;g__Staphylococcus;s__epidermidis;	Unclassified;	Bacteria;Firmicutes;Bacilli;Bacillales;Staphylococcaceae;Staphylococcus;	Bacteria;Firmicutes;Bacilli;Bacillales;Staphylococcaceae;Staphylococcus;
FM056_006	tataagactgggataacttcgggaaaccggagctaataccggataatatattgaaccgcatggttcaatagtgaaagacggttttgctgtcacttatagatggatccgcgccgcattagctagttggtaaggtaacggcttaccaaggcaacgatgcgtagccgacctgagagggtgatcggccacactggaactgagacacggtccagactcctacgggaggcagcagtagggaatcttccgcaatgggcgaaagcctgacggagcaacgccgcgtgagtgatgaaggtcttcggatcgtaaaactctgttattagggaagaacaaatgtgtaagtaactatgcacgtcttgacggtacctaatcagaaagccacggctaactacgtgccagcagccg…	Bacteria;	k__Bacteria;p__Firmicutes;c__Bacilli;o__Bacillales;f__Staphylococcaceae;g__Staphylococcus;s__epidermidis;	Unclassified;	Bacteria;Firmicutes;Bacilli;Bacillales;Staphylococcaceae;Staphylococcus;	Bacteria;Firmicutes;Bacilli;Bacillales;Staphylococcaceae;Staphylococcus;
FM056_007	tataagactgggataacttcgggaaaccggagctaataccggataatatattgaaccgcatggttcaatagtgaaagacggttttgctgtcacttatagatggatccgcgccgcattagctagttggtaaggtaacggcttaccaaggcaacgatgcgtagccgacctgagagggtgatcggccacactggaactgagacacggtccagactcctacgggaggcagcagtagggaatcttccgcaatgggcgaaagcctgacggagcaacgccgcgtgagtgatgaaggtcttcggatcgtaaaactctgttattagggaagaacaaatgtgtaagtaactatgcacgtcttgacggtacctaatcagaaagccacggctaactacgtgccagcagccg…	Bacteria;Firmicutes;Bacilli;Bacillales;Staphylococcaceae;Staphylococcus;	k__Bacteria;p__Firmicutes;c__Bacilli;o__Bacillales;f__Staphylococcaceae;g__Staphylococcus;s__epidermidis;	Unclassified;	Bacteria;Firmicutes;Bacilli;Bacillales;Staphylococcaceae;Staphylococcus;	Bacteria;Firmicutes;Bacilli;Bacillales;Staphylococcaceae;Staphylococcus;
FM056_008	cttaactctgggataagcctgggaaactgggtctaataccggataggagcgccnaccgcatggtgggtgttggaaagatttatcggttttggatggactcgcggcctatcagcttgttggtgaggtaatggctcaccaaggcgacgacgggtagccggcctgagagggtgaccggccacactgggactgagacacggcccagactcctacgggaggcagcagtggggaatattgcacaatgggcgaaagcctgatgcagcgacgccgcgtgagggatgacggccttcgggttgtaaacctctttcagtagggaagaagcgaaagtgacggtacctgcagaagaagcaccggctaactacgtgccagcagccgcggtaatacgtagggtgcgagcgttat…	Bacteria;Actinobacteria;Micrococcales;Micrococcaceae;Micrococcus;	k__Bacteria;p__Actinobacteria;c__Actinobacteria;o__Actinomycetales;f__Micrococcaceae;g__Micrococcus;s__luteus;	Unclassified;	Bacteria;"Actinobacteria";Actinobacteria;Actinobacteridae;Actinomycetales;Micrococcineae;Micrococcaceae;Micrococcus;	Bacteria;Actinobacteria;Actinobacteria;Micrococcales;Micrococcaceae;Micrococcus;
FM056_009	tataagactgggataacttcgggaaaccggagctaataccggataatatattgaaccgcatggttcaatagtgaaagacggttttgctgtcacttatagatggatccgcgccgcattagctagttggtaaggtaacggcttaccaaggcaacgatgcgtagccgacctgagagggtgatcggccacactggaactgagacacggtccagactcctacgggaggcagcagtagggaatcttccgcaatgggcgaaagcctgacggagcaacgccgcgtgagtgatgaaggtcttcggatcgtaaaactctgttattagggaagaacaaatgtgtaagtaactatgcacgtcttgacggtacctaatcagaaagccacggctaactacgtgccagcagccg…	Bacteria;	k__Bacteria;p__Firmicutes;c__Bacilli;o__Bacillales;f__Staphylococcaceae;g__Staphylococcus;s__epidermidis;	Unclassified;	Bacteria;Firmicutes;Bacilli;Bacillales;Staphylococcaceae;Staphylococcus;	Bacteria;Firmicutes;Bacilli;Bacillales;Staphylococcaceae;Staphylococcus;
FM056_011	cttaactctgggataagcctgggaaactgggtctaataccggataggagcgccnaccgcatggtgggtgttggaaagatttatcggttttggatggactcgcggcctatcagcttgttggtgaggtaatggctcaccaaggcgacgacgggtagccggcctgagagggtgaccggccacactgggactgagacacggcccagactcctacgggaggcagcagtggggaatattgcacaatgggcgaaagcctgatgcagcgacgccgcgtgagggatgacggccttcgggttgtaaacctctttcagtagggaagaagcgaaagtgacggtacctgcagaagaagcaccggctaactacgtgccagcagccgcggtaatacgtagggtgcgagcgttat…	Bacteria;Actinobacteria;Micrococcales;Micrococcaceae;Micrococcus;	k__Bacteria;p__Actinobacteria;c__Actinobacteria;o__Actinomycetales;f__Micrococcaceae;g__Micrococcus;s__luteus;	Bacteria;Actinobacteria;Actinobacteria;Micrococcales;Micrococcaceae;Micrococcus;	Bacteria;"Actinobacteria";Actinobacteria;Actinobacteridae;Actinomycetales;Micrococcineae;Micrococcaceae;Micrococcus;	Bacteria;Actinobacteria;Actinobacteria;Micrococcales;Micrococcaceae;Micrococcus;
FM056_012	tataagactgggataacttcgggaaaccggagctaataccggataatatattgaaccgcatggttcaatagtgaaagacggttttgctgtcacttatagatggatccgcgccgcattagctagttggtaaggtaacggcttaccaaggcaacgatgcgtagccgacctgagagggtgatcggccacactggaactgagacacggtccagactcctacgggaggcagcagtagggaatcttccgcaatgggcgaaagcctgacggagcaacgccgcgtgagtgatgaaggtcttcggatcgtaaaactctgttattagggaagaacaaatgtgtaagtaactatgcacgtcttgacggtacctaatcagaaagccacggctaactacgtgccagcagccg…	Bacteria;Firmicutes;Bacilli;Bacillales;Staphylococcaceae;Staphylococcus;	k__Bacteria;p__Firmicutes;c__Bacilli;o__Bacillales;f__Staphylococcaceae;g__Staphylococcus;s__epidermidis;	Unclassified;	Bacteria;Firmicutes;Bacilli;Bacillales;Staphylococcaceae;Staphylococcus;	Bacteria;Firmicutes;Bacilli;Bacillales;Staphylococcaceae;Staphylococcus;
FM056_013	tataagactgggataacttcgggaaaccggagctaataccggataatatattgaaccgcatggttcaatagtgaaagacggttttgctgtcacttatagatggatccgcgccgcattagctagttggtaaggtaacggcttaccaaggcaacgatgcgtagccgacctgagagggtgatcggccacactggaactgagacacggtccagactcctacgggaggcagcagtagggaatcttccgcaatgggcgaaagcctgacggagcaacgccgcgtgagtgatgaaggtcttcggatcgtaaaactctgttattagggaagaacaaatgtgtaagtaactatgcacgtcttgacggtacctaatcagaaagccacggctaactacgtgccagcagccg…	Bacteria;	k__Bacteria;p__Firmicutes;c__Bacilli;o__Bacillales;f__Staphylococcaceae;g__Staphylococcus;s__epidermidis;	Unclassified;	Bacteria;Firmicutes;Bacilli;Bacillales;Staphylococcaceae;Staphylococcus;	Bacteria;Firmicutes;Bacilli;Bacillales;Staphylococcaceae;Staphylococcus;
FM056_014	tataagactgggataacttcgggaaaccggagctaataccggataatatattgaaccgcatggttcaatagtgaaagacggttttgctgtcacttatagatggatccgcgccgcattagctagttggtaaggtaacggcttaccaaggcaacgatgcgtagccgacctgagagggtgatcggccacactggaactgagacacggtccagactcctacgggaggcagcagtagggaatcttccgcaatgggcgaaagcctgacggagcaacgccgcgtgagtgatgaaggtcttcggatcgtaaaactctgttattagggaagaacaaatgtgtaagtaactatgcacgtcttgacggtacctaatcagaaagccacggctaactacgtgccagcagccg…	Bacteria;	k__Bacteria;p__Firmicutes;c__Bacilli;o__Bacillales;f__Staphylococcaceae;g__Staphylococcus;s__epidermidis;	Unclassified;	Bacteria;Firmicutes;Bacilli;Bacillales;Staphylococcaceae;Staphylococcus;	Bacteria;Firmicutes;Bacilli;Bacillales;Staphylococcaceae;Staphylococcus;
FM056_015	tataagactgggataacttcgggaaaccggagctaataccggataatatattgaaccgcatggttcaatagtgaaagacggttttgctgtcacttatagatggatccgcgccgcattagctagttggtaaggtaacggcttaccaaggcaacgatgcgtagccgacctgagagggtgatcggccacactggaactgagacacggtccagactcctacgggaggcagcagtagggaatcttccgcaatgggcgaaagcctgacggagcaacgccgcgtgagtgatgaaggtcttcggatcgtaaaactctgttattagggaagaacaaatgtgtaagtaactatgcacgtcttgacggtacctaatcagaaagccacggctaactacgtgccagcagccg…	Bacteria;	k__Bacteria;p__Firmicutes;c__Bacilli;o__Bacillales;f__Staphylococcaceae;g__Staphylococcus;s__epidermidis;	Unclassified;	Bacteria;Firmicutes;Bacilli;Bacillales;Staphylococcaceae;Staphylococcus;	Bacteria;Firmicutes;Bacilli;Bacillales;Staphylococcaceae;Staphylococcus;
FM057_001	cctgactctgggataagcgttggaaacgacgtctaatactggatatgatcactggccgcatggtctggtggtggaaagattttttggttggggatggactcgcggcctatcagcttgttggtgaggtaatggctcaccaaggcgacgacgggtagccggcctgagagggtgaccggccacactgggactgagacacggcccagactcctacgggaggcagcagtggggaatattgcacaatgggcgaaagcctgatgcagcaacgccgcgtgagggatgacggccttcgggttgtaaacctcttttagtagggaagaagcgaaagtgacggtacctgcagaaaaagcaccggctaactacgtgccagcagccgcggtaatacgtagggtgcaagcgttg…	Bacteria;Actinobacteria;Micrococcales;Microbacteriaceae;Curtobacterium;	k__Bacteria;p__Actinobacteria;c__Actinobacteria;o__Actinomycetales;f__Microbacteriaceae;g__Curtobacterium;	Unclassified;	Bacteria;"Actinobacteria";Actinobacteria;Actinobacteridae;Actinomycetales;Micrococcineae;Microbacteriaceae;Curtobacterium;	Bacteria;Actinobacteria;Actinobacteria;Micrococcales;Microbacteriaceae;Curtobacterium;
FM057_002	tataagactgggataacttcgggaaaccggagctaataccggataatatattgaaccgcatggttcaatagtgaaagacggttttgctgtcacttatagatggatccgcgccgcattagctagttggtaaggtaacggcttaccaaggcaacgatgcgtagccgacctgagagggtgatcggccacactggaactgagacacggtccagactcctacgggaggcagcagtagggaatcttccgcaatgggcgaaagcctgacggagcaacgccgcgtgagtgatgaaggtcttcggatcgtaaaactctgttattagggaagaacaaatgtgtaagtaactatgcacgtcttgacggtacctaatcagaaagccacggctaactacgtgccagcagccg…	Bacteria;Firmicutes;Bacilli;Bacillales;Staphylococcaceae;Staphylococcus;	k__Bacteria;p__Firmicutes;c__Bacilli;o__Bacillales;f__Staphylococcaceae;g__Staphylococcus;s__epidermidis;	Bacteria;Firmicutes;Bacilli;Bacillales;Staphylococcaceae;Staphylococcus;	Bacteria;Firmicutes;Bacilli;Bacillales;Staphylococcaceae;Staphylococcus;	Bacteria;Firmicutes;Bacilli;Bacillales;Staphylococcaceae;Staphylococcus;
FM057_003	tataagactgggataacttcgggaaaccggagctaataccggataacatgttgaaccgcatggttcaacagtgaaagacggtcttgctgtcacttatagatggatccgcgccgcattagctagttggtaaggtaacggcttaccaaggcaacgatgcgtagccgacctgagagggtgatcggccacactggaactgagacacggtccagactcctacgggaggcagcagtagggaatcttccgcaatgggcgaaagcctgacggagcaacgccgcgtgagtgaagaaggtcttcggatcgtaaaactctgttattagggaagaacaaatgtgtaagtaactatgcacgtcttgacggtacctaatcagaaagccacggctaactacgtgccagcagccg…	Bacteria;	k__Bacteria;p__Firmicutes;c__Bacilli;o__Bacillales;f__Staphylococcaceae;g__Staphylococcus;	Unclassified;	Bacteria;Firmicutes;Bacilli;Bacillales;Staphylococcaceae;Staphylococcus;	Bacteria;Firmicutes;Bacilli;Bacillales;Staphylococcaceae;Staphylococcus;
FM057_004	tataagactgggataacttcgggaaaccggagctaataccggataatatattgaaccgcatggttcaatagtgaaagacggttttgctgtcacttatagatggatccgcgccgcattagctagttggtaaggtaacggcttaccaaggcaacgatgcgtagccgacctgagagggtgatcggccacactggaactgagacacggtccagactcctacgggaggcagcagtagggaatcttccgcaatgggcgaaagcctgacggagcaacgccgcgtgagtgatgaaggtcttcggatcgtaaaactctgttattagggaagaacaaatgtgtaagtaactatgcacgtcttgacggtacctaatcagaaagccacggctaactacgtgccagcagccg…	Bacteria;Firmicutes;Bacilli;Bacillales;Staphylococcaceae;Staphylococcus;	k__Bacteria;p__Firmicutes;c__Bacilli;o__Bacillales;f__Staphylococcaceae;g__Staphylococcus;s__epidermidis;	Unclassified;	Bacteria;Firmicutes;Bacilli;Bacillales;Staphylococcaceae;Staphylococcus;	Bacteria;Firmicutes;Bacilli;Bacillales;Staphylococcaceae;Staphylococcus;
FM057_005	tttaactctgggataagccttggaaacgaggtctaataccggatacgactagttcccgcatgggatgctggtggaaagggatatgtactggttttagatgggctcacggcctatcagcttgttggtgaggtaacggctcaccaaggcgacgacgggtagccggcctgagagggtgaccggccacactgggactgagacacggcccagactcctacgggaggcagcagtggggaatattgcacaatgggcgcaagcctgatgcagcgacgccgcgtgagggatgacggccttcgggttgtaaacctctttcagcagggaagaagcgaaagtgacggtacctgcagaagaagcgccggctaactacgtgccagcagccgcggtaatacgtagggcgcgagc…	Unclassified;	k__Bacteria;p__Actinobacteria;c__Actinobacteria;o__Actinomycetales;f__Micrococcaceae;	Bacteria;Actinobacteria;Actinobacteria;Micrococcales;Micrococcaceae;Rothia;	Bacteria;"Actinobacteria";Actinobacteria;Actinobacteridae;Actinomycetales;Micrococcineae;Micrococcaceae;Rothia;	Bacteria;Actinobacteria;Actinobacteria;Micrococcales;Micrococcaceae;Rothia;
FM057_006	tataagactgggataacttcgggaaaccggagctaataccggataatatattgaaccgcatggttcaatagtgaaagacggttttgctgtcacttatagatggatccgcgccgcattagctagttggtaaggtaacggcttaccaaggcaacgatgcgtagccgacctgagagggtgatcggccacactggaactgagacacggtccagactcctacgggaggcagcagtagggaatcttccgcaatgggcgaaagcctgacggagcaacgccgcgtgagtgatgaaggtcttcggatcgtaaaactctgttattagggaagaacaaatgtgtaagtaactatgcacgtcttgacggtacctaatcagaaagccacggctaactacgtgccagcagccg…	Bacteria;	k__Bacteria;p__Firmicutes;c__Bacilli;o__Bacillales;f__Staphylococcaceae;g__Staphylococcus;s__epidermidis;	Unclassified;	Bacteria;Firmicutes;Bacilli;Bacillales;Staphylococcaceae;Staphylococcus;	Bacteria;Firmicutes;Bacilli;Bacillales;Staphylococcaceae;Staphylococcus;
FM057_007	tataagactggaataactccgggaaaccggggctaatgccggataacatttagaaccgcatggttctaaagtgaaagatggttttgctatcacttatagatggacccgcgccgtattagctagttggtaaggtaacggcttaccaaggcaacgatacgtagccgacctgagagggtgatcggccacactggaactgagacacggtccagactcctacgggaggcagcagtagggaatcttccgcaatgggcgaaagcctgacggagcaacgccgcgtgagtgatgaaggtcttcggatcgtaaaactctgttattagggaagaacaaatgtgtaagtaactatgcacgtcttgacggtacctaatcagaaagccacggctaactacgtgccagcagccg…	Bacteria;Firmicutes;Bacilli;Bacillales;Staphylococcaceae;Staphylococcus;	k__Bacteria;p__Firmicutes;c__Bacilli;o__Bacillales;f__Staphylococcaceae;g__Staphylococcus;	Unclassified;	Bacteria;Firmicutes;Bacilli;Bacillales;Staphylococcaceae;Staphylococcus;	Bacteria;Firmicutes;Bacilli;Bacillales;Staphylococcaceae;Staphylococcus;
FM057_008	cttgactctgggataagcgctggaaacggcgtctaataccggatatgacaaccgacggcatcgtctggttgtggaaagaattttggtcaaggatggactcgcggcctatcagcttgttggtgaggtaatggctcaccaaggcgacgacgggtagccggcctgagagggtgaccggccacactgggactgagacacggcccagactcctacgggaggcagcagtggggaatattgcacaatgggcgaaagcctgatgcagcaacgccgcgtgagggacgacggccttcgggttgtaaacctcttttagcagggaagaagcgaaagtgacggtacctgcagaaaaagcaccggctaactacgtgccagcagccgcggtaatacgtagggtgcaagcgttgt…	Bacteria;	k__Bacteria;p__Actinobacteria;c__Actinobacteria;o__Actinomycetales;f__Microbacteriaceae;g__Mycetocola;	Bacteria;Actinobacteria;Actinobacteria;Micrococcales;Microbacteriaceae;Okibacterium;	Bacteria;"Actinobacteria";Actinobacteria;Actinobacteridae;Actinomycetales;Micrococcineae;Microbacteriaceae;Okibacterium;	Bacteria;Actinobacteria;Actinobacteria;Micrococcales;Microbacteriaceae;Okibacterium;
FM057_010	tataagactgggataacttcgggaaaccggagctaataccggataatatttcgaaccgcatggttcgatagtgaaagatggctctgctatcacttatagatggacctgcgccgtattagctagttggtaaggtaacggcttaccaaggcaacgatacgtagccgacctgagagggtgatcggccacactggaactgagacacggtccagactcctacgggaggcagcagtagggaatcttccgcaatgggcgaaagcctgacggagcaacgccgcgtgagtgatgaaggtcttcggatcgtaaaactctgttattagggaagaacaaacgtgtaagtaactgtgcacgtcttgacggtacctaatcagaaagccacggctaactacgtgccagcagccg…	Bacteria;Firmicutes;Bacilli;Bacillales;Staphylococcaceae;Staphylococcus;	k__Bacteria;p__Firmicutes;c__Bacilli;o__Bacillales;f__Staphylococcaceae;g__Staphylococcus;	Unclassified;	Bacteria;Firmicutes;Bacilli;Bacillales;Staphylococcaceae;Staphylococcus;	Bacteria;Firmicutes;Bacilli;Bacillales;Staphylococcaceae;Staphylococcus;
FM057_013	tataagactgggataacttcgggaaaccggagctaataccggataacatgttgaaccgcatggttcaacagtgaaagacggtcttgctgtcacttatagatggatccgcgccgcattagctagttggtaaggtaacggcttaccaaggcaacgatgcgtagccgacctgagagggtgatcggccacactggaactgagacacggtccagactcctacgggaggcagcagtagggaatcttccgcaatgggcgaaagcctgacggagcaacgccgcgtgagtgaagaaggtcttcggatcgtaaaactctgttattagggaagaacaaatgtgtaagtaactatgcacgtcttgacggtacctaatcagaaagccacggctaactacgtgccagcagccg…	Bacteria;	k__Bacteria;p__Firmicutes;c__Bacilli;o__Bacillales;f__Staphylococcaceae;g__Staphylococcus;	Unclassified;	Bacteria;Firmicutes;Bacilli;Bacillales;Staphylococcaceae;Staphylococcus;	Bacteria;Firmicutes;Bacilli;Bacillales;Staphylococcaceae;Staphylococcus;
FM057_014	tataagactgggataacttcgggaaaccggagctaataccggataacatgttgaaccgcatggttcaacagtgaaagacggtcttgctgtcacttatagatggatccgcgccgcattagctagttggtaaggtaacggcttaccaaggcaacgatgcgtagccgacctgagagggtgatcggccacactggaactgagacacggtccagactcctacgggaggcagcagtagggaatcttccgcaatgggcgaaagcctgacggagcaacgccgcgtgagtgaagaaggtcttcggatcgtaaaactctgttattagggaagaacaaatgtgtaagtaactatgcacgtcttgacggtacctaatcagaaagccacggctaactacgtgccagcagccg…	Bacteria;	k__Bacteria;p__Firmicutes;c__Bacilli;o__Bacillales;f__Staphylococcaceae;g__Staphylococcus;	Unclassified;	Bacteria;Firmicutes;Bacilli;Bacillales;Staphylococcaceae;Staphylococcus;	Bacteria;Firmicutes;Bacilli;Bacillales;Staphylococcaceae;Staphylococcus;
FM057_015	cttgactctgggataagcgctggaaacggcgtctaataccggatatgacaaccgacggcatcgtctggttgtggaaagaattttggtcaaggatggactcgcggcctatcagcttgttggtgaggtaatggctcaccaaggcgacgacgggtagccggcctgagagggtgaccggccacactgggactgagacacggcccagactcctacgggaggcagcagtggggaatattgcacaatgggcgaaagcctgatgcagcaacgccgcgtgagggacgacggccttcgggttgtaaacctcttttagcagggaagaagcgaaagtgacggtacctgcagaaaaagcaccggctaactacgtgccagcagccgcggtaatacgtagggtgcaagcgttgt…	Bacteria;	k__Bacteria;p__Actinobacteria;c__Actinobacteria;o__Actinomycetales;f__Microbacteriaceae;g__Mycetocola;	Bacteria;Actinobacteria;Actinobacteria;Micrococcales;Microbacteriaceae;Okibacterium;	Bacteria;"Actinobacteria";Actinobacteria;Actinobacteridae;Actinomycetales;Micrococcineae;Microbacteriaceae;Okibacterium;	Bacteria;Actinobacteria;Actinobacteria;Micrococcales;Microbacteriaceae;Okibacterium;
FM057_016	tataagactgggataacttcgggaaaccggagctaataccggataatatattgaaccgcatggttcaatagtgaaagacggttttgctgtcacttatagatggatccgcgccgcattagctagttggtaaggtaacggcttaccaaggcaacgatgcgtagccgacctgagagggtgatcggccacactggaactgagacacggtccagactcctacgggaggcagcagtagggaatcttccgcaatgggcgaaagcctgacggagcaacgccgcgtgagtgatgaaggtcttcggatcgtaaaactctgttattagggaagaacaaatgtgtaagtaactatgcacgtcttgacggtacctaatcagaaagccacggctaactacgtgccagcagccg…	Bacteria;Firmicutes;Bacilli;Bacillales;Staphylococcaceae;Staphylococcus;	k__Bacteria;p__Firmicutes;c__Bacilli;o__Bacillales;f__Staphylococcaceae;g__Staphylococcus;s__epidermidis;	Unclassified;	Bacteria;Firmicutes;Bacilli;Bacillales;Staphylococcaceae;Staphylococcus;	Bacteria;Firmicutes;Bacilli;Bacillales;Staphylococcaceae;Staphylococcus;
FM058_001	tttaggttcggaataactcagggaaacttgtgctaataccgaatgtgcccttcgggggaaagatttatcgcctttagagcggcccgcgtctgattagctagttggtgaggtaaaggctcaccaaggcgacgatcagtagctggtctgagaggatgatcagccacattgggactgagacacggcccaaactcctacgggaggcagcagtggggaatcttgcgcaatgggcgaaagcctgacgcagccatgccgcgtgaatgatgaaggtcttaggattgtaaaattctttcaccggggacgataatgacggtacccggagaagaagccccggctaacttcgtgccagcagccgcggtaatacgaagggggctagcgttgctcggaattactgggcgtaaa…	Bacteria;	k__Bacteria;p__Proteobacteria;c__Alphaproteobacteria;o__Caulobacterales;f__Caulobacteraceae;	Unclassified;	Bacteria;"Proteobacteria";Alphaproteobacteria;Caulobacterales;Caulobacteraceae;Brevundimonas;	Bacteria;Proteobacteria;Alphaproteobacteria;Caulobacterales;Caulobacteraceae;Brevundimonas;
[truncated: 232 more rows]

## Sheet: ST4_TreeGroups
Silva Accession	Taxonomy	Number of Isolates' best blast hits	Isolates >>
AB098569-FYOSp303	Acinetobacter_sp-_TUT1001	1	AM058_018
AF423078-HQPAc330	actinobacterium_'#33_yellow'	1	AF066_408
AY238501-GEJS1194	Arthrobacter_sp-_108	1	AF058_013
CP004858-BcsTh240	Bacillus thuringiensis_serovar_kurstaki_str._YBT-1520	2	AF060_101	AM054_006
AY224387-BcsCer29	Bacillus_cereus	1	FM062_002
CP001283-BcsCe347	Bacillus_cereus_AH820	1	AM065_008
AHCU01000001-BcsC2727	Bacillus_cereus_BAG1X2-2	5	AF054_001	AF060_301	AF063_001	AF063_008	FM058_014
LABL01000036-BcsC2396	Bacillus_cereus_MHI_226	5	AF054_002	AF054_022	AF054_024	AM054_003	FM070_101
[truncated: 75 more rows]
[truncated: 88 more columns]

## Sheet: ST5_FungalIsolates
	name for tree	merged ITS 1 and 2 (repeated Ns truncated to single N for brevity
[truncated: 63 more rows]

[truncated: 3 more sheets: ST6_CarbonSources, ST7_IsolateDiversityBySite, ST8_IsolationConditionsSummary]
